# Supplementary material for: Conserved MicroRNAs in Human Nasopharynx Tissue Samples from Swabs Are Differentially Expressed in Response to SARS-CoV-2
Source: MDPI journal article supplement (doi:10.3390/genes13020348), 2022-02-14
Supplement: s1 [file s1]

This document certifies that the manuscript

**Conserved microRNAs in human nasopharynx tissue samples from swabs are differentially expressed in response to SARS-CoV-2**

prepared by the authors

**Aleš Eichmeier. Tomáš Kiss. Mária Kocanová. Eliška Hakalová. Milan Špetík. Jana Čechová. Boris Tichý**

was edited for proper English language, grammar, punctuation, spelling, and overall style by one or more of the highly qualified native English speaking editors at AJE.

This certificate was issued on **July 20, 2021** and may be verified on the [AJE website](#) using the verification code **024B-94EO-945B-E7D2-E70A**.

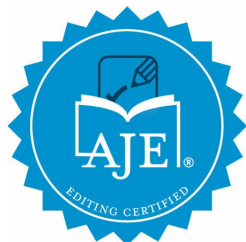

Neither the research content nor the authors' intentions were altered in any way during the editing process. Documents receiving this certification should be English-ready for publication; however, the author has the ability to accept or reject our suggestions and changes. To verify the final AJE edited version, please visit our verification page at [aje.com/certificate](#). If you have any questions or concerns about this edited document, please contact AJE at [support@aje.com](mailto:support@aje.com).
