# Supplementary material for: Conserved MicroRNAs in Human Nasopharynx Tissue Samples from Swabs Are Differentially Expressed in Response to SARS-CoV-2
Source: Genes (Basel). 2022 Feb 14;13(2):348. doi: 10.3390/genes13020348 (PMC8871708; doi:10.3390/genes13020348)
Supplement: Supplementary file 1 [file genes-13-00348-s001.zip]

Archive with 12 entries (12 files):
- Fig_1.tif
- Fig_2.tif
- Fig_3.tif
- Fig_4.tif
- Fig_5.tif
- Fig_6.tif
- Figure legends.docx
- Supplementary Table S1.ods
- Supplementary Table S2.ods
- Supplementary Table S3.xlsx
- Supplementary Table S4.xlsx
- ZDPM89FB_024B-94E0-945B-E7D2-E70A.pdf
