# Supplementary material for: Conserved MicroRNAs in Human Nasopharynx Tissue Samples from Swabs Are Differentially Expressed in Response to SARS-CoV-2
Source: Genes (Basel). 2022 Feb 14;13(2):348. doi: 10.3390/genes13020348 (PMC8871708; doi:10.3390/genes13020348)
Supplement: Supplementary file 1 [file genes-13-00348-s001.zip › Supplementary Table S1.ods]

## Sheet: 1A
Expression values	Name	Resource	Exact mature 5'	Mature 5'	Unique exact mature 5'	Unique mature 5'	Exact mature 3'	Mature 3'	Unique exact mature 3'	Unique mature 3'	Exact other	Other	Total
74,051.00	mir-148a	Homo sapiens	16	27	16	27	66619	73974	66619	73878	46	50	74051
11,860.00	mir-21	Homo sapiens	4356	11699	4356	11699	2	5	2	5	135	156	11860
10,461.00	mir-99a	Homo sapiens	99	10439	99	10423	0	0	0	0	20	22	10461
10,100.00	mir-200a	Homo sapiens	303	638	303	638	7	9422	7	9405	40	40	10100
9,409.00	mir-34c	Homo sapiens	1673	8567	1673	8566	58	105	58	105	698	737	9409
7,084.00	let-7b	Homo sapiens	2655	6376	2655	6370	0	2	0	2	643	706	7084
6,646.00	mir-27b	Homo sapiens	0	0	0	0	345	6633	345	6609	1	13	6646
6,503.00	mir-151a	Homo sapiens	19	34	19	34	4232	6417	4232	6417	16	52	6503
5,856.00	mir-200b	Homo sapiens	35	115	35	115	588	5696	588	5686	7	45	5856
3,837.00	mir-375	Homo sapiens	0	0	0	0	911	3654	911	3654	166	183	3837
3,575.00	let-7i	Homo sapiens	2713	3505	2713	3500	0	2	0	2	60	68	3575
3,557.00	mir-27a	Homo sapiens	18	30	18	30	18	3526	18	3503	0	1	3557
3,463.00	mir-30d	Homo sapiens	616	3375	616	3371	1	5	1	5	69	83	3463
2,874.00	mir-200c	Homo sapiens	0	0	0	0	752	2800	752	2794	71	74	2874
2,146.00	let-7c	Homo sapiens	1397	2074	1397	2066	0	0	0	0	58	72	2146
2,117.00	mir-3074	Homo sapiens	0	2094	0	2094	0	23	0	23	0	0	2117
1,716.00	mir-26a-2	Homo sapiens	1428	1707	0	0	0	2	0	2	7	7	1716
1,712.00	mir-26a-1	Homo sapiens	1428	1705	0	0	0	0	0	0	7	7	1712
1,659.00	mir-423	Homo sapiens	633	1305	633	1305	118	253	118	253	92	101	1659
1,433.00	mir-10400	Homo sapiens	0	1433	0	1433	0	0	0	0	0	0	1433
1,365.00	mir-429	Homo sapiens	0	0	0	0	686	1341	686	1341	23	24	1365
1,354.00	let-7f-2	Homo sapiens	211	1329	0	205	0	2	0	2	19	23	1354
1,264.00	let-7g	Homo sapiens	334	1249	334	1244	0	0	0	0	15	15	1264
1,236.00	mir-30a	Homo sapiens	170	908	170	906	68	232	68	227	83	96	1236
1,169.00	mir-205	Homo sapiens	305	1165	305	1165	0	0	0	0	4	4	1169
1,153.00	let-7f-1	Homo sapiens	211	1132	0	7	0	0	0	0	19	21	1153
1,144.00	mir-203b	Homo sapiens	2	1143	2	1143	0	0	0	0	1	1	1144
1,059.00	mir-3960	Homo sapiens	0	0	0	0	0	20	0	20	0	1039	1059
1,052.00	let-7a-1	Homo sapiens	139	996	0	2	1	11	0	0	26	45	1052
1,046.00	let-7a-3	Homo sapiens	140	989	0	0	1	11	0	0	27	46	1046
1,044.00	let-7a-2	Homo sapiens	140	998	0	0	0	0	0	0	26	46	1044
1,043.00	mir-183	Homo sapiens	640	1042	640	1042	0	0	0	0	0	1	1043
811.00	mir-146b	Homo sapiens	448	808	448	802	0	2	0	2	0	1	811
764.00	mir-22	Homo sapiens	1	72	1	72	348	654	348	654	35	38	764
753.00	mir-378a	Homo sapiens	0	0	0	0	12	753	12	753	0	0	753
614.00	mir-146a	Homo sapiens	224	612	224	606	0	0	0	0	2	2	614
596.00	mir-92b	Homo sapiens	0	20	0	20	129	490	129	473	66	86	596
588.00	mir-8072	Homo sapiens	0	0	0	0	0	0	0	0	0	588	588
562.00	mir-320a	Homo sapiens	0	0	0	0	224	540	224	516	6	22	562
512.00	mir-29a	Homo sapiens	0	3	0	3	7	463	7	463	40	46	512
491.00	mir-100	Homo sapiens	10	484	10	468	0	0	0	0	7	7	491
470.00	mir-182	Homo sapiens	59	395	59	395	0	3	0	3	64	72	470
470.00	mir-30e	Homo sapiens	33	205	33	203	88	187	88	182	75	78	470
438.00	mir-25	Homo sapiens	2	3	2	3	242	430	242	430	4	5	438
428.00	mir-148b	Homo sapiens	0	2	0	2	167	426	167	331	0	0	428
412.00	mir-99b	Homo sapiens	87	373	87	373	15	31	15	31	4	8	412
386.00	mir-532	Homo sapiens	321	384	321	384	0	2	0	2	0	0	386
385.00	mir-222	Homo sapiens	0	0	0	0	137	303	137	303	63	82	385
372.00	mir-125a	Homo sapiens	5	314	5	314	0	10	0	10	46	48	372
339.00	mir-128-1	Homo sapiens	0	0	0	0	93	338	0	128	0	1	339
288.00	mir-101-2	Homo sapiens	0	0	0	0	38	281	0	22	5	7	288
281.00	mir-192	Homo sapiens	39	207	39	207	0	0	0	0	49	74	281
281.00	mir-1246	Homo sapiens	1	281	1	281	0	0	0	0	0	0	281
276.00	mir-101-1	Homo sapiens	0	0	0	0	39	268	0	0	6	8	276
263.00	mir-186	Homo sapiens	136	263	136	263	0	0	0	0	0	0	263
247.00	mir-34b	Homo sapiens	0	3	0	3	1	244	1	244	0	0	247
246.00	mir-184	Homo sapiens	0	0	0	0	181	239	181	239	5	7	246
236.00	mir-1180	Homo sapiens	0	0	0	0	139	236	139	236	0	0	236
231.00	mir-152	Homo sapiens	0	0	0	0	29	231	29	231	0	0	231
226.00	mir-744	Homo sapiens	11	218	11	218	0	0	0	0	6	8	226
216.00	mir-26b	Homo sapiens	90	216	90	216	0	0	0	0	0	0	216
216.00	mir-128-2	Homo sapiens	0	0	0	0	94	216	0	7	0	0	216
214.00	mir-142	Homo sapiens	2	22	2	22	3	13	3	13	159	179	214
212.00	mir-141	Homo sapiens	2	2	2	2	0	182	0	161	26	28	212
207.00	mir-361	Homo sapiens	5	8	5	8	19	195	19	195	4	4	207
204.00	mir-181a-2	Homo sapiens	12	155	0	0	3	15	3	15	31	34	204
203.00	mir-224	Homo sapiens	0	157	0	157	0	1	0	1	44	45	203
194.00	mir-181a-1	Homo sapiens	11	155	0	0	3	6	3	6	28	33	194
193.00	mir-191	Homo sapiens	79	180	79	180	0	0	0	0	13	13	193
190.00	mir-140	Homo sapiens	18	24	18	24	19	126	19	126	16	40	190
183.00	mir-28	Homo sapiens	3	42	3	42	36	138	36	138	3	3	183
170.00	mir-2110	Homo sapiens	28	128	28	128	0	0	0	0	16	42	170
143.00	mir-143	Homo sapiens	0	0	0	0	83	143	83	143	0	0	143
136.00	mir-340	Homo sapiens	72	123	72	123	8	13	8	13	0	0	136
135.00	mir-221	Homo sapiens	0	16	0	16	24	104	24	104	15	15	135
133.00	mir-3184	Homo sapiens	0	31	0	31	0	0	0	0	92	102	133
129.00	mir-92a-1	Homo sapiens	0	0	0	0	50	127	0	14	0	2	129
115.00	mir-125b-2	Homo sapiens	19	82	0	0	0	15	0	15	17	18	115
115.00	mir-190b	Homo sapiens	34	115	34	115	0	0	0	0	0	0	115
114.00	let-7d	Homo sapiens	1	105	1	100	0	2	0	2	7	7	114
113.00	mir-92a-2	Homo sapiens	0	0	0	0	51	113	0	2	0	0	113
101.00	mir-24-2	Homo sapiens	0	29	0	29	0	63	0	0	9	9	101
100.00	mir-125b-1	Homo sapiens	20	82	0	0	0	2	0	2	16	16	100
99.00	let-7e	Homo sapiens	7	94	7	90	0	1	0	1	4	4	99
98.00	mir-3159	Homo sapiens	0	0	0	0	0	0	0	0	17	98	98
97.00	mir-449a	Homo sapiens	53	88	53	87	0	0	0	0	8	9	97
93.00	mir-3615	Homo sapiens	0	0	0	0	0	90	0	90	0	3	93
91.00	mir-342	Homo sapiens	12	75	12	75	6	15	6	15	1	1	91
87.00	mir-449c	Homo sapiens	6	87	6	87	0	0	0	0	0	0	87
76.00	mir-95	Homo sapiens	0	0	0	0	4	76	4	76	0	0	76
69.00	mir-98	Homo sapiens	33	53	33	51	0	0	0	0	9	16	69
68.00	mir-16-2	Homo sapiens	10	33	0	0	10	31	10	31	3	4	68
66.00	mir-23b	Homo sapiens	4	21	4	21	0	24	0	24	11	21	66
65.00	mir-1285-1	Homo sapiens	0	2	0	2	0	2	0	0	18	61	65
64.00	mir-24-1	Homo sapiens	0	4	0	4	0	60	0	0	0	0	64
61.00	mir-6510	Homo sapiens	0	0	0	0	8	61	8	61	0	0	61
58.00	mir-218-2	Homo sapiens	35	58	0	0	0	0	0	0	0	0	58
57.00	mir-218-1	Homo sapiens	35	57	0	0	0	0	0	0	0	0	57
55.00	mir-708	Homo sapiens	0	1	0	1	0	53	0	53	1	1	55
53.00	mir-30c-2	Homo sapiens	30	38	0	0	0	8	0	8	7	7	53
52.00	mir-363	Homo sapiens	0	0	0	0	29	52	29	52	0	0	52
51.00	mir-451a	Homo sapiens	2	50	2	50	0	0	0	0	1	1	51
49.00	mir-135b	Homo sapiens	38	49	38	49	0	0	0	0	0	0	49
46.00	mir-8086	Homo sapiens	0	0	0	0	0	0	0	0	0	46	46
45.00	mir-30c-1	Homo sapiens	29	38	0	0	0	0	0	0	7	7	45
44.00	mir-223	Homo sapiens	0	9	0	9	4	33	4	33	2	2	44
44.00	mir-9-1	Homo sapiens	2	31	0	0	1	1	0	0	11	12	44
44.00	mir-9-2	Homo sapiens	2	28	0	0	0	2	0	0	13	14	44
43.00	mir-1843	Homo sapiens	1	38	1	38	0	0	0	0	1	5	43
42.00	mir-9-3	Homo sapiens	3	27	0	0	1	2	0	0	12	13	42
42.00	mir-155	Homo sapiens	0	33	0	33	0	0	0	0	6	9	42
42.00	mir-582	Homo sapiens	0	0	0	0	31	42	31	42	0	0	42
42.00	mir-769	Homo sapiens	24	42	24	42	0	0	0	0	0	0	42
40.00	mir-32	Homo sapiens	19	35	19	35	0	5	0	5	0	0	40
39.00	mir-132	Homo sapiens	1	21	1	21	4	8	4	8	8	10	39
37.00	mir-378i	Homo sapiens	0	37	0	37	0	0	0	0	0	0	37
36.00	mir-425	Homo sapiens	0	29	0	29	0	7	0	7	0	0	36
35.00	mir-16-1	Homo sapiens	10	35	0	1	0	0	0	0	0	0	35
33.00	mir-7851	Homo sapiens	0	0	0	0	0	0	0	0	0	33	33
32.00	mir-1290	Homo sapiens	0	0	0	0	0	32	0	32	0	0	32
31.00	mir-1307	Homo sapiens	4	4	4	4	0	27	0	27	0	0	31
30.00	mir-181b-1	Homo sapiens	1	12	0	0	0	0	0	0	16	18	30
30.00	mir-106b	Homo sapiens	0	3	0	3	2	16	2	16	11	11	30
29.00	mir-7-1	Homo sapiens	21	26	0	0	0	0	0	0	3	3	29
29.00	mir-619	Homo sapiens	2	11	2	11	0	0	0	0	1	18	29
28.00	mir-7-2	Homo sapiens	20	26	0	0	0	0	0	0	2	2	28
28.00	mir-7-3	Homo sapiens	20	26	0	0	0	0	0	0	2	2	28
28.00	mir-149	Homo sapiens	1	21	1	21	0	0	0	0	7	7	28
28.00	mir-181b-2	Homo sapiens	1	10	0	0	0	0	0	0	17	18	28
27.00	mir-328	Homo sapiens	0	0	0	0	22	26	22	26	1	1	27
26.00	mir-345	Homo sapiens	6	25	6	25	0	0	0	0	1	1	26
26.00	mir-629	Homo sapiens	16	26	16	26	0	0	0	0	0	0	26
26.00	mir-1299	Homo sapiens	0	0	0	0	0	26	0	26	0	0	26
26.00	mir-4430	Homo sapiens	0	0	0	0	0	0	0	0	0	26	26
25.00	mir-10a	Homo sapiens	1	25	1	25	0	0	0	0	0	0	25
25.00	mir-339	Homo sapiens	0	2	0	2	2	18	2	18	5	5	25
25.00	mir-651	Homo sapiens	2	25	2	25	0	0	0	0	0	0	25
24.00	mir-23a	Homo sapiens	0	1	0	1	0	22	0	22	0	1	24
24.00	mir-204	Homo sapiens	13	23	13	23	0	1	0	1	0	0	24
24.00	mir-628	Homo sapiens	2	8	2	8	6	16	6	16	0	0	24
23.00	mir-30b	Homo sapiens	6	22	6	22	0	1	0	1	0	0	23
23.00	mir-511	Homo sapiens	11	23	11	23	0	0	0	0	0	0	23
23.00	mir-642b	Homo sapiens	10	23	10	23	0	0	0	0	0	0	23
22.00	mir-330	Homo sapiens	0	4	0	4	3	18	3	18	0	0	22
22.00	mir-574	Homo sapiens	0	2	0	2	9	12	9	12	6	8	22
22.00	mir-320b-1	Homo sapiens	0	0	0	0	0	21	0	0	0	1	22
22.00	mir-4446	Homo sapiens	0	0	0	0	9	19	9	19	3	3	22
21.00	mir-625	Homo sapiens	0	16	0	16	0	5	0	5	0	0	21
21.00	mir-320b-2	Homo sapiens	0	0	0	0	0	21	0	0	0	0	21
21.00	mir-1287	Homo sapiens	10	20	10	20	0	0	0	0	1	1	21
20.00	mir-96	Homo sapiens	19	20	19	20	0	0	0	0	0	0	20
20.00	mir-3135b	Homo sapiens	0	2	0	2	0	0	0	0	0	18	20
20.00	mir-4485	Homo sapiens	0	0	0	0	0	7	0	7	6	13	20
18.00	mir-501	Homo sapiens	0	0	0	0	0	18	0	18	0	0	18
18.00	mir-103b-1	Homo sapiens	9	16	0	0	0	0	0	0	1	2	18
18.00	mir-7706	Homo sapiens	0	0	0	0	0	17	0	17	1	1	18
17.00	mir-484	Homo sapiens	8	17	8	17	0	0	0	0	0	0	17
17.00	mir-3929	Homo sapiens	0	0	0	0	0	0	0	0	4	17	17
16.00	mir-20a	Homo sapiens	15	16	15	16	0	0	0	0	0	0	16
16.00	mir-29b-2	Homo sapiens	0	0	0	0	0	14	0	0	1	2	16
16.00	mir-150	Homo sapiens	5	10	5	10	0	6	0	6	0	0	16
16.00	mir-103b-2	Homo sapiens	9	15	0	0	0	0	0	0	1	1	16
16.00	mir-4472-2	Homo sapiens	0	0	0	0	0	0	0	0	3	16	16
16.00	mir-6842	Homo sapiens	0	0	0	0	7	16	7	16	0	0	16
16.00	mir-1273h	Homo sapiens	0	1	0	1	0	0	0	0	4	15	16
15.00	mir-193a	Homo sapiens	0	15	0	15	0	0	0	0	0	0	15
15.00	mir-452	Homo sapiens	0	0	0	0	0	0	0	0	14	15	15
15.00	mir-660	Homo sapiens	0	15	0	15	0	0	0	0	0	0	15
15.00	mir-1262	Homo sapiens	2	11	2	11	0	0	0	0	3	4	15
14.00	mir-29b-1	Homo sapiens	0	0	0	0	0	14	0	0	0	0	14
14.00	mir-1301	Homo sapiens	0	0	0	0	0	8	0	8	6	6	14
14.00	mir-874	Homo sapiens	0	0	0	0	7	14	7	14	0	0	14
13.00	mir-29c	Homo sapiens	0	5	0	5	2	7	2	7	0	1	13
13.00	mir-374a	Homo sapiens	1	9	1	9	0	4	0	4	0	0	13
13.00	mir-335	Homo sapiens	0	0	0	0	8	13	8	13	0	0	13
13.00	mir-374b	Homo sapiens	4	13	4	13	0	0	0	0	0	0	13
13.00	mir-941-3	Homo sapiens	0	0	0	0	9	13	0	0	0	0	13
13.00	mir-10395	Homo sapiens	0	0	0	0	2	10	2	10	3	3	13
12.00	mir-455	Homo sapiens	0	8	0	8	0	2	0	2	0	2	12
12.00	mir-941-1	Homo sapiens	0	0	0	0	8	12	0	0	0	0	12
12.00	mir-941-2	Homo sapiens	0	0	0	0	9	12	0	0	0	0	12
12.00	mir-941-4	Homo sapiens	0	0	0	0	8	12	0	0	0	0	12
11.00	mir-215	Homo sapiens	0	10	0	9	0	0	0	0	0	1	11
11.00	mir-194-2	Homo sapiens	0	8	0	0	3	3	3	3	0	0	11
11.00	mir-486-1	Homo sapiens	2	11	0	1	0	0	0	0	0	0	11
11.00	mir-499a	Homo sapiens	5	11	5	11	0	0	0	0	0	0	11
10.00	mir-185	Homo sapiens	1	10	1	10	0	0	0	0	0	0	10
10.00	mir-324	Homo sapiens	3	3	3	3	0	0	0	0	0	7	10
10.00	mir-3158-1	Homo sapiens	0	8	0	0	0	2	0	0	0	0	10
10.00	mir-941-5	Homo sapiens	0	0	0	0	8	10	0	0	0	0	10
9.00	mir-31	Homo sapiens	0	9	0	9	0	0	0	0	0	0	9
9.00	mir-576	Homo sapiens	0	0	0	0	3	9	3	9	0	0	9
9.00	mir-671	Homo sapiens	0	0	0	0	1	9	1	9	0	0	9
9.00	mir-1269a	Homo sapiens	0	0	0	0	1	8	1	8	0	1	9
8.00	mir-422a	Homo sapiens	0	8	0	8	0	0	0	0	0	0	8
8.00	mir-193b	Homo sapiens	0	1	0	1	6	7	6	7	0	0	8
8.00	mir-449b	Homo sapiens	2	8	2	7	0	0	0	0	0	0	8
8.00	mir-1304	Homo sapiens	0	0	0	0	0	0	0	0	4	8	8
8.00	mir-3158-2	Homo sapiens	0	6	0	0	0	2	0	0	0	0	8
8.00	mir-3665	Homo sapiens	0	0	0	0	0	0	0	0	0	8	8
8.00	mir-486-2	Homo sapiens	1	8	0	0	0	0	0	0	0	0	8
7.00	mir-210	Homo sapiens	0	0	0	0	0	6	0	6	0	1	7
7.00	mir-126	Homo sapiens	0	0	0	0	0	7	0	7	0	0	7
7.00	mir-194-1	Homo sapiens	0	7	0	0	0	0	0	0	0	0	7
7.00	mir-509-3	Homo sapiens	0	7	0	7	0	0	0	0	0	0	7
7.00	mir-1303	Homo sapiens	0	0	0	0	3	6	3	6	1	1	7
7.00	mir-3913-2	Homo sapiens	0	5	0	0	0	0	0	0	2	2	7
6.00	mir-34a	Homo sapiens	1	6	1	6	0	0	0	0	0	0	6
6.00	mir-130a	Homo sapiens	0	0	0	0	0	6	0	6	0	0	6
6.00	mir-181d	Homo sapiens	1	6	1	6	0	0	0	0	0	0	6
6.00	mir-450a-2	Homo sapiens	0	4	0	0	0	2	0	2	0	0	6
6.00	mir-1285-2	Homo sapiens	0	0	0	0	0	3	0	0	0	3	6
6.00	mir-1306	Homo sapiens	0	0	0	0	0	5	0	5	1	1	6
6.00	mir-3613	Homo sapiens	0	6	0	6	0	0	0	0	0	0	6
6.00	mir-548o-2	Homo sapiens	0	0	0	0	5	6	0	0	0	0	6
6.00	mir-4423	Homo sapiens	0	0	0	0	0	6	0	6	0	0	6
6.00	mir-6747	Homo sapiens	0	0	0	0	0	6	0	6	0	0	6
5.00	mir-500a	Homo sapiens	0	0	0	0	0	5	0	4	0	0	5
5.00	mir-548o	Homo sapiens	0	0	0	0	5	5	0	0	0	0	5
5.00	mir-3177	Homo sapiens	0	0	0	0	4	5	4	5	0	0	5
5.00	mir-3913-1	Homo sapiens	0	5	0	0	0	0	0	0	0	0	5
5.00	mir-3936	Homo sapiens	0	0	0	0	5	5	5	5	0	0	5
5.00	mir-4488	Homo sapiens	0	5	0	5	0	0	0	0	0	0	5
5.00	mir-6843	Homo sapiens	0	0	0	0	0	5	0	5	0	0	5
5.00	mir-9985	Homo sapiens	0	5	0	5	0	0	0	0	0	0	5
5.00	mir-10396b	Homo sapiens	0	0	0	0	0	0	0	0	5	5	5
5.00	mir-12136	Homo sapiens	0	0	0	0	0	0	0	0	3	5	5
4.00	mir-19a	Homo sapiens	0	0	0	0	0	4	0	4	0	0	4
4.00	mir-19b-1	Homo sapiens	0	0	0	0	0	4	0	0	0	0	4
4.00	mir-199a-1	Homo sapiens	0	0	0	0	1	4	0	0	0	0	4
4.00	mir-122	Homo sapiens	4	4	4	4	0	0	0	0	0	0	4
4.00	mir-589	Homo sapiens	0	4	0	4	0	0	0	0	0	0	4
4.00	mir-652	Homo sapiens	0	0	0	0	2	4	2	4	0	0	4
4.00	mir-659	Homo sapiens	2	4	2	4	0	0	0	0	0	0	4
4.00	mir-873	Homo sapiens	0	4	0	4	0	0	0	0	0	0	4
4.00	mir-944	Homo sapiens	0	0	0	0	0	4	0	4	0	0	4
4.00	mir-1268a	Homo sapiens	0	0	0	0	0	0	0	0	0	4	4
4.00	mir-3135a	Homo sapiens	0	0	0	0	0	0	0	0	0	4	4
4.00	mir-378c	Homo sapiens	0	3	0	3	0	0	0	0	1	1	4
4.00	mir-3648-1	Homo sapiens	0	0	0	0	0	0	0	0	2	4	4
4.00	mir-5684	Homo sapiens	0	0	0	0	0	0	0	0	0	4	4
4.00	mir-6827	Homo sapiens	0	4	0	4	0	0	0	0	0	0	4
4.00	mir-10399	Homo sapiens	0	0	0	0	0	2	0	2	2	2	4
3.00	mir-19b-2	Homo sapiens	0	0	0	0	0	3	0	0	0	0	3
3.00	mir-197	Homo sapiens	0	0	0	0	0	3	0	3	0	0	3
3.00	mir-129-1	Homo sapiens	3	3	0	0	0	0	0	0	0	0	3
3.00	mir-181c	Homo sapiens	0	3	0	3	0	0	0	0	0	0	3
3.00	mir-187	Homo sapiens	0	0	0	0	0	3	0	3	0	0	3
3.00	mir-199a-2	Homo sapiens	0	0	0	0	0	2	0	0	0	1	3
3.00	mir-212	Homo sapiens	0	1	0	1	0	2	0	2	0	0	3
3.00	mir-15b	Homo sapiens	1	1	1	1	1	2	1	2	0	0	3
3.00	mir-145	Homo sapiens	0	0	0	0	0	3	0	3	0	0	3
3.00	mir-365a	Homo sapiens	0	0	0	0	0	3	0	0	0	0	3
3.00	mir-338	Homo sapiens	0	3	0	3	0	0	0	0	0	0	3
3.00	mir-450a-1	Homo sapiens	0	3	0	0	0	0	0	0	0	0	3
3.00	mir-561	Homo sapiens	0	3	0	3	0	0	0	0	0	0	3
3.00	mir-590	Homo sapiens	0	0	0	0	2	3	2	3	0	0	3
3.00	mir-421	Homo sapiens	0	0	0	0	0	3	0	3	0	0	3
3.00	mir-450b	Homo sapiens	2	3	2	3	0	0	0	0	0	0	3
3.00	mir-760	Homo sapiens	0	0	0	0	0	3	0	3	0	0	3
3.00	mir-548k	Homo sapiens	2	3	2	2	0	0	0	0	0	0	3
3.00	mir-1294	Homo sapiens	0	3	0	3	0	0	0	0	0	0	3
3.00	mir-1276	Homo sapiens	0	3	0	3	0	0	0	0	0	0	3
3.00	mir-1278	Homo sapiens	0	0	0	0	0	0	0	0	3	3	3
3.00	mir-3128	Homo sapiens	0	3	0	3	0	0	0	0	0	0	3
3.00	mir-3195	Homo sapiens	0	0	0	0	0	0	0	0	0	3	3
3.00	mir-3605	Homo sapiens	0	3	0	3	0	0	0	0	0	0	3
3.00	mir-676	Homo sapiens	0	1	0	1	2	2	2	2	0	0	3
3.00	mir-378f	Homo sapiens	0	0	0	0	0	2	0	2	0	1	3
3.00	mir-4662a	Homo sapiens	3	3	3	3	0	0	0	0	0	0	3
3.00	mir-3529	Homo sapiens	0	0	0	0	0	0	0	0	3	3	3
3.00	mir-5571	Homo sapiens	0	0	0	0	0	0	0	0	3	3	3
2.00	mir-33a	Homo sapiens	0	2	0	2	0	0	0	0	0	0	2
2.00	mir-107	Homo sapiens	0	0	0	0	0	0	0	0	2	2	2
2.00	mir-199b	Homo sapiens	0	0	0	0	0	2	0	0	0	0	2
2.00	mir-203a	Homo sapiens	0	0	0	0	0	2	0	2	0	0	2
2.00	mir-129-2	Homo sapiens	2	2	0	0	0	0	0	0	0	0	2
2.00	mir-365b	Homo sapiens	0	0	0	0	0	2	0	0	0	0	2
2.00	mir-382	Homo sapiens	2	2	2	2	0	0	0	0	0	0	2
2.00	mir-331	Homo sapiens	0	2	0	2	0	0	0	0	0	0	2
2.00	mir-424	Homo sapiens	0	0	0	0	0	2	0	2	0	0	2
2.00	mir-505	Homo sapiens	0	2	0	2	0	0	0	0	0	0	2
2.00	mir-514a-1	Homo sapiens	0	0	0	0	1	2	0	0	0	0	2
2.00	mir-514a-2	Homo sapiens	0	0	0	0	2	2	0	0	0	0	2
2.00	mir-514a-3	Homo sapiens	0	0	0	0	2	2	0	0	0	0	2
2.00	mir-556	Homo sapiens	0	2	0	2	0	0	0	0	0	0	2
2.00	mir-597	Homo sapiens	0	0	0	0	0	0	0	0	0	2	2
2.00	mir-548d-2	Homo sapiens	0	2	0	2	0	0	0	0	0	0	2
2.00	mir-942	Homo sapiens	0	2	0	2	0	0	0	0	0	0	2
2.00	mir-548f-2	Homo sapiens	0	0	0	0	0	2	0	0	0	0	2
2.00	mir-548i-1	Homo sapiens	1	2	0	0	0	0	0	0	0	0	2
2.00	mir-320d-1	Homo sapiens	0	0	0	0	2	2	0	0	0	0	2
2.00	mir-320c-2	Homo sapiens	0	0	0	0	0	2	0	0	0	0	2
2.00	mir-544b	Homo sapiens	0	0	0	0	0	0	0	0	0	2	2
2.00	mir-548u	Homo sapiens	0	0	0	0	0	2	0	2	0	0	2
2.00	mir-500b	Homo sapiens	0	0	0	0	0	2	0	2	0	0	2
2.00	mir-3690-1	Homo sapiens	0	0	0	0	0	0	0	0	2	2	2
2.00	mir-3909	Homo sapiens	0	0	0	0	1	1	1	1	0	1	2
2.00	mir-3941	Homo sapiens	0	0	0	0	0	0	0	0	2	2	2
2.00	mir-378g	Homo sapiens	0	2	0	2	0	0	0	0	0	0	2
2.00	mir-4452	Homo sapiens	0	0	0	0	0	0	0	0	0	2	2
2.00	mir-4645	Homo sapiens	0	0	0	0	0	2	0	2	0	0	2
2.00	mir-5193	Homo sapiens	0	0	0	0	2	2	2	2	0	0	2
2.00	mir-664b	Homo sapiens	0	1	0	1	0	0	0	0	1	1	2
2.00	mir-1295b	Homo sapiens	0	0	0	0	0	2	0	2	0	0	2
2.00	mir-6515	Homo sapiens	0	0	0	0	0	2	0	2	0	0	2
2.00	mir-6808	Homo sapiens	0	0	0	0	0	2	0	2	0	0	2
2.00	mir-6866	Homo sapiens	0	2	0	2	0	0	0	0	0	0	2
2.00	mir-3690-2	Homo sapiens	0	0	0	0	0	0	0	0	2	2	2
2.00	mir-9902-1	Homo sapiens	0	0	0	0	0	0	0	0	0	2	2
2.00	mir-10396a	Homo sapiens	0	0	0	0	0	0	0	0	2	2	2
2.00	mir-10527	Homo sapiens	2	2	2	2	0	0	0	0	0	0	2
1.00	mir-93	Homo sapiens	0	0	0	0	0	1	0	1	0	0	1
1.00	mir-103a-2	Homo sapiens	0	0	0	0	0	0	0	0	1	1	1
1.00	mir-103a-1	Homo sapiens	0	0	0	0	0	0	0	0	1	1	1
1.00	mir-10b	Homo sapiens	0	1	0	0	0	0	0	0	0	0	1
1.00	mir-153-2	Homo sapiens	0	0	0	0	1	1	0	0	0	0	1
1.00	mir-195	Homo sapiens	0	0	0	0	0	1	0	1	0	0	1
1.00	mir-409	Homo sapiens	0	0	0	0	0	0	0	0	1	1	1
1.00	mir-432	Homo sapiens	0	1	0	1	0	0	0	0	0	0	1
1.00	mir-504	Homo sapiens	0	1	0	1	0	0	0	0	0	0	1
1.00	mir-616	Homo sapiens	0	0	0	0	0	1	0	1	0	0	1
1.00	mir-653	Homo sapiens	0	0	0	0	0	0	0	0	1	1	1
1.00	mir-320c-1	Homo sapiens	0	0	0	0	0	1	0	0	0	0	1
1.00	mir-1468	Homo sapiens	0	1	0	1	0	0	0	0	0	0	1
1.00	mir-454	Homo sapiens	0	0	0	0	1	1	1	1	0	0	1
1.00	mir-378d-2	Homo sapiens	0	1	0	1	0	0	0	0	0	0	1
1.00	mir-147b	Homo sapiens	0	0	0	0	0	1	0	1	0	0	1
1.00	mir-935	Homo sapiens	0	0	0	0	0	0	0	0	0	1	1
1.00	mir-548e	Homo sapiens	0	0	0	0	0	1	0	1	0	0	1
1.00	mir-1295a	Homo sapiens	0	0	0	0	0	1	0	1	0	0	1
1.00	mir-548f-1	Homo sapiens	0	1	0	1	0	0	0	0	0	0	1
1.00	mir-548f-3	Homo sapiens	0	0	0	0	0	1	0	0	0	0	1
1.00	mir-1260a	Homo sapiens	0	0	0	0	0	0	0	0	0	1	1
1.00	mir-548i-4	Homo sapiens	1	1	0	0	0	0	0	0	0	0	1
1.00	mir-1284	Homo sapiens	0	1	0	1	0	0	0	0	0	0	1
1.00	mir-1288	Homo sapiens	0	0	0	0	0	1	0	1	0	0	1
1.00	mir-664a	Homo sapiens	0	1	0	1	0	0	0	0	0	0	1
1.00	mir-320d-2	Homo sapiens	0	0	0	0	1	1	0	0	0	0	1
1.00	mir-3174	Homo sapiens	0	1	0	1	0	0	0	0	0	0	1
1.00	mir-3180-2	Homo sapiens	0	0	0	0	0	0	0	0	0	1	1
1.00	mir-3180-3	Homo sapiens	0	0	0	0	0	0	0	0	1	1	1
1.00	mir-3065	Homo sapiens	0	1	0	1	0	0	0	0	0	0	1
1.00	mir-1244-3	Homo sapiens	0	0	0	0	0	0	0	0	0	1	1
1.00	mir-1972-2	Homo sapiens	0	0	0	0	0	0	0	0	0	1	1
1.00	mir-3679	Homo sapiens	0	0	0	0	0	0	0	0	1	1	1
1.00	mir-548ae-1	Homo sapiens	0	0	0	0	0	1	0	0	0	0	1
1.00	mir-4448	Homo sapiens	0	0	0	0	0	1	0	1	0	0	1
1.00	mir-4511	Homo sapiens	0	1	0	1	0	0	0	0	0	0	1
1.00	mir-4529	Homo sapiens	0	1	0	1	0	0	0	0	0	0	1
1.00	mir-4539	Homo sapiens	0	0	0	0	0	0	0	0	1	1	1
1.00	mir-4652	Homo sapiens	0	1	0	1	0	0	0	0	0	0	1
1.00	mir-4661	Homo sapiens	0	1	0	1	0	0	0	0	0	0	1
1.00	mir-4677	Homo sapiens	0	1	0	1	0	0	0	0	0	0	1
1.00	mir-1343	Homo sapiens	0	0	0	0	0	1	0	1	0	0	1
1.00	mir-4703	Homo sapiens	0	0	0	0	0	1	0	1	0	0	1
1.00	mir-4709	Homo sapiens	0	1	0	1	0	0	0	0	0	0	1
1.00	mir-4742	Homo sapiens	1	1	1	1	0	0	0	0	0	0	1
1.00	mir-4746	Homo sapiens	0	1	0	1	0	0	0	0	0	0	1
1.00	mir-4763	Homo sapiens	0	0	0	0	0	1	0	1	0	0	1
1.00	mir-4772	Homo sapiens	0	0	0	0	1	1	1	1	0	0	1
1.00	mir-4779	Homo sapiens	0	0	0	0	1	1	1	1	0	0	1
1.00	mir-5584	Homo sapiens	0	1	0	1	0	0	0	0	0	0	1
1.00	mir-5701-1	Homo sapiens	0	1	0	0	0	0	0	0	0	0	1
1.00	mir-5708	Homo sapiens	0	0	0	0	0	0	0	0	1	1	1
1.00	mir-5701-2	Homo sapiens	0	1	0	0	0	0	0	0	0	0	1
1.00	mir-5787	Homo sapiens	0	1	0	1	0	0	0	0	0	0	1
1.00	mir-6735	Homo sapiens	0	0	0	0	0	0	0	0	1	1	1
1.00	mir-6743	Homo sapiens	0	0	0	0	0	0	0	0	0	1	1
1.00	mir-6777	Homo sapiens	0	1	0	1	0	0	0	0	0	0	1
1.00	mir-6833	Homo sapiens	0	1	0	1	0	0	0	0	0	0	1
1.00	mir-6837	Homo sapiens	0	0	0	0	1	1	1	1	0	0	1
1.00	mir-6839	Homo sapiens	0	1	0	1	0	0	0	0	0	0	1
1.00	mir-6873	Homo sapiens	0	0	0	0	0	1	0	1	0	0	1
1.00	mir-7703	Homo sapiens	0	0	0	0	0	1	0	1	0	0	1
1.00	mir-6516	Homo sapiens	0	1	0	1	0	0	0	0	0	0	1
1.00	mir-8485	Homo sapiens	0	0	0	0	0	0	0	0	0	1	1
1.00	mir-1244-4	Homo sapiens	0	0	0	0	0	0	0	0	0	1	1
1.00	mir-9902-2	Homo sapiens	0	0	0	0	0	0	0	0	0	1	1
0.00	mir-153-1	Homo sapiens	0	0	0	0	0	0	0	0	0	0	0
0.00	mir-502	Homo sapiens	0	0	0	0	0	0	0	0	0	0	0
0.00	mir-548f-4	Homo sapiens	0	0	0	0	0	0	0	0	0	0	0
0.00	mir-1244-1	Homo sapiens	0	0	0	0	0	0	0	0	0	0	0
0.00	mir-548i-2	Homo sapiens	0	0	0	0	0	0	0	0	0	0	0
0.00	mir-548i-3	Homo sapiens	0	0	0	0	0	0	0	0	0	0	0
0.00	mir-1972-1	Homo sapiens	0	0	0	0	0	0	0	0	0	0	0
0.00	mir-3180-1	Homo sapiens	0	0	0	0	0	0	0	0	0	0	0
0.00	mir-1244-2	Homo sapiens	0	0	0	0	0	0	0	0	0	0	0
0.00	mir-548ab	Homo sapiens	0	0	0	0	0	0	0	0	0	0	0
0.00	mir-548ae-2	Homo sapiens	0	0	0	0	0	0	0	0	0	0	0
0.00	mir-451b	Homo sapiens	0	0	0	0	0	0	0	0	0	0	0
0.00	mir-3648-2	Homo sapiens	0	0	0	0	0	0	0	0	0	0	0
0.00	mir-5701-3	Homo sapiens	0	0	0	0	0	0	0	0	0	0	0

## Sheet: 2A
Expression values	Name	Resource	Exact mature 5'	Mature 5'	Unique exact mature 5'	Unique mature 5'	Exact mature 3'	Mature 3'	Unique exact mature 3'	Unique mature 3'	Exact other	Other	Total
46,477.00	mir-148a	Homo sapiens	4	5	4	5	42196	46437	42196	46369	31	35	46477
5,996.00	mir-21	Homo sapiens	1209	5933	1209	5933	3	4	3	4	53	59	5996
5,635.00	mir-200a	Homo sapiens	513	891	513	891	1	4733	1	4724	11	11	5635
4,490.00	mir-151a	Homo sapiens	5	7	5	7	3149	4461	3149	4461	6	22	4490
2,646.00	let-7i	Homo sapiens	2106	2613	2106	2610	0	0	0	0	31	33	2646
2,505.00	mir-200b	Homo sapiens	13	39	13	39	87	2450	87	2448	4	16	2505
2,444.00	let-7b	Homo sapiens	1141	2283	1141	2278	0	0	0	0	149	161	2444
2,354.00	mir-34c	Homo sapiens	504	2035	504	2035	16	25	16	25	284	294	2354
1,926.00	mir-99a	Homo sapiens	47	1924	47	1921	0	0	0	0	2	2	1926
1,049.00	mir-375	Homo sapiens	0	0	0	0	217	993	217	993	52	56	1049
1,024.00	mir-30d	Homo sapiens	148	1008	148	1006	0	0	0	0	9	16	1024
1,011.00	mir-27b	Homo sapiens	0	0	0	0	75	1003	75	1001	1	8	1011
872.00	mir-200c	Homo sapiens	0	1	0	1	330	854	330	853	15	17	872
701.00	mir-423	Homo sapiens	219	584	219	584	41	74	41	74	42	43	701
604.00	let-7f-2	Homo sapiens	123	595	0	197	0	0	0	0	6	9	604
574.00	mir-30a	Homo sapiens	45	365	45	363	40	162	40	153	36	47	574
559.00	let-7c	Homo sapiens	369	538	369	534	0	0	0	0	20	21	559
514.00	mir-26a-2	Homo sapiens	424	513	0	0	0	0	0	0	1	1	514
512.00	mir-26a-1	Homo sapiens	425	511	0	0	0	0	0	0	1	1	512
491.00	mir-27a	Homo sapiens	1	8	1	8	0	483	0	481	0	0	491
481.00	let-7g	Homo sapiens	225	475	225	467	0	0	0	0	5	6	481
471.00	mir-146a	Homo sapiens	123	468	123	468	0	0	0	0	2	3	471
460.00	mir-449c	Homo sapiens	102	449	102	449	0	4	0	4	2	7	460
400.00	let-7f-1	Homo sapiens	123	390	0	1	0	3	0	3	5	7	400
368.00	mir-320a	Homo sapiens	0	0	0	0	125	359	125	348	3	9	368
367.00	mir-183	Homo sapiens	242	365	242	365	0	0	0	0	0	2	367
309.00	mir-3074	Homo sapiens	0	303	0	303	0	6	0	6	0	0	309
309.00	mir-203b	Homo sapiens	0	309	0	309	0	0	0	0	0	0	309
281.00	mir-205	Homo sapiens	45	280	45	280	0	0	0	0	1	1	281
281.00	mir-146b	Homo sapiens	130	278	130	277	0	2	0	2	0	1	281
252.00	mir-182	Homo sapiens	71	236	71	236	0	1	0	1	13	15	252
245.00	let-7a-1	Homo sapiens	50	222	0	0	1	6	0	0	10	17	245
245.00	let-7a-3	Homo sapiens	51	223	0	0	1	7	0	0	11	15	245
237.00	let-7a-2	Homo sapiens	50	221	0	0	0	0	0	0	12	16	237
228.00	mir-92b	Homo sapiens	0	42	0	42	37	163	37	161	13	23	228
220.00	mir-25	Homo sapiens	0	1	0	1	97	218	97	218	0	1	220
208.00	mir-378a	Homo sapiens	0	0	0	0	1	208	1	208	0	0	208
207.00	mir-222	Homo sapiens	0	0	0	0	66	115	66	115	81	92	207
204.00	mir-361	Homo sapiens	0	1	0	1	18	199	18	199	3	4	204
196.00	mir-184	Homo sapiens	0	0	0	0	158	189	158	189	7	7	196
195.00	mir-140	Homo sapiens	1	5	1	5	12	150	12	150	9	40	195
172.00	mir-429	Homo sapiens	0	0	0	0	59	167	59	167	5	5	172
166.00	mir-100	Homo sapiens	4	160	4	155	0	0	0	0	6	6	166
165.00	mir-148b	Homo sapiens	0	0	0	0	55	165	55	98	0	0	165
162.00	mir-99b	Homo sapiens	49	138	49	138	12	17	12	17	7	7	162
160.00	mir-30e	Homo sapiens	3	41	3	38	29	76	29	66	41	43	160
144.00	mir-449a	Homo sapiens	80	117	80	115	0	0	0	0	23	27	144
141.00	mir-191	Homo sapiens	69	130	69	130	0	0	0	0	9	11	141
128.00	mir-224	Homo sapiens	3	110	3	110	0	0	0	0	18	18	128
119.00	mir-29a	Homo sapiens	0	0	0	0	5	92	5	92	27	27	119
104.00	mir-92a-1	Homo sapiens	0	0	0	0	34	104	0	16	0	0	104
103.00	mir-22	Homo sapiens	0	7	0	7	31	83	31	83	13	13	103
103.00	mir-34b	Homo sapiens	0	4	0	3	0	97	0	97	0	2	103
93.00	mir-192	Homo sapiens	7	79	7	78	0	0	0	0	13	14	93
93.00	mir-186	Homo sapiens	23	89	23	89	0	0	0	0	2	4	93
92.00	mir-10400	Homo sapiens	0	92	0	92	0	0	0	0	0	0	92
91.00	mir-1180	Homo sapiens	0	0	0	0	38	84	38	84	5	7	91
87.00	mir-28	Homo sapiens	0	13	0	13	34	74	34	74	0	0	87
86.00	mir-92a-2	Homo sapiens	0	0	0	0	34	86	0	0	0	0	86
84.00	mir-141	Homo sapiens	2	6	2	6	0	71	0	62	7	7	84
83.00	mir-3184	Homo sapiens	0	37	0	37	0	0	0	0	43	46	83
82.00	mir-128-1	Homo sapiens	0	0	0	0	21	79	0	30	0	3	82
82.00	mir-744	Homo sapiens	6	81	6	81	0	0	0	0	0	1	82
81.00	mir-532	Homo sapiens	68	81	68	81	0	0	0	0	0	0	81
78.00	mir-101-2	Homo sapiens	0	0	0	0	15	77	0	5	1	1	78
78.00	mir-2110	Homo sapiens	5	43	5	43	0	0	0	0	9	35	78
75.00	mir-95	Homo sapiens	0	0	0	0	1	75	1	75	0	0	75
75.00	mir-101-1	Homo sapiens	0	0	0	0	15	74	0	0	0	1	75
68.00	mir-152	Homo sapiens	0	0	0	0	2	64	2	64	0	4	68
67.00	mir-425	Homo sapiens	1	63	1	63	0	4	0	4	0	0	67
64.00	mir-3960	Homo sapiens	0	0	0	0	0	0	0	0	0	64	64
63.00	mir-181a-2	Homo sapiens	5	48	0	0	0	0	0	0	12	15	63
59.00	mir-181a-1	Homo sapiens	4	46	0	0	0	0	0	0	10	13	59
57.00	mir-125a	Homo sapiens	4	43	4	43	0	4	0	4	10	10	57
54.00	mir-128-2	Homo sapiens	0	0	0	0	21	54	0	0	0	0	54
51.00	mir-3615	Homo sapiens	0	0	0	0	0	51	0	51	0	0	51
47.00	mir-221	Homo sapiens	0	9	0	9	9	21	9	21	15	17	47
47.00	mir-342	Homo sapiens	2	27	2	27	1	15	1	15	5	5	47
45.00	mir-7706	Homo sapiens	0	0	0	0	7	45	7	45	0	0	45
44.00	mir-340	Homo sapiens	21	36	21	36	1	8	1	8	0	0	44
40.00	mir-26b	Homo sapiens	21	40	21	40	0	0	0	0	0	0	40
40.00	mir-7-2	Homo sapiens	29	36	0	0	0	0	0	0	3	4	40
39.00	mir-155	Homo sapiens	0	37	0	37	0	0	0	0	1	2	39
38.00	mir-7-3	Homo sapiens	28	35	0	0	0	0	0	0	3	3	38
37.00	mir-7-1	Homo sapiens	28	33	0	0	1	1	1	1	3	3	37
37.00	mir-142	Homo sapiens	1	2	1	2	1	6	1	6	26	29	37
32.00	mir-23b	Homo sapiens	1	9	1	9	0	12	0	12	6	11	32
31.00	mir-363	Homo sapiens	0	0	0	0	19	30	19	30	1	1	31
31.00	mir-582	Homo sapiens	0	0	0	0	26	31	26	31	0	0	31
31.00	mir-1843	Homo sapiens	1	29	1	29	0	0	0	0	0	2	31
30.00	mir-1307	Homo sapiens	0	0	0	0	0	30	0	30	0	0	30
29.00	mir-106b	Homo sapiens	0	0	0	0	7	21	7	21	8	8	29
28.00	mir-98	Homo sapiens	14	25	14	25	0	0	0	0	1	3	28
25.00	mir-143	Homo sapiens	0	0	0	0	19	25	19	25	0	0	25
25.00	mir-708	Homo sapiens	0	3	0	3	0	21	0	21	1	1	25
25.00	mir-8072	Homo sapiens	0	0	0	0	0	0	0	0	0	25	25
24.00	mir-30c-2	Homo sapiens	12	17	0	0	1	5	1	5	2	2	24
23.00	mir-574	Homo sapiens	0	1	0	1	16	16	16	16	6	6	23
21.00	mir-96	Homo sapiens	19	21	19	21	0	0	0	0	0	0	21
21.00	mir-125b-1	Homo sapiens	0	16	0	1	0	3	0	3	2	2	21
21.00	mir-125b-2	Homo sapiens	0	14	0	0	0	4	0	4	2	3	21
21.00	mir-181b-2	Homo sapiens	5	13	0	2	0	0	0	0	6	8	21
21.00	mir-135b	Homo sapiens	14	21	14	21	0	0	0	0	0	0	21
21.00	mir-941-1	Homo sapiens	0	0	0	0	15	21	0	0	0	0	21
21.00	mir-941-3	Homo sapiens	0	0	0	0	15	21	0	0	0	0	21
19.00	mir-16-2	Homo sapiens	1	7	0	0	0	9	0	9	3	3	19
19.00	mir-150	Homo sapiens	9	15	9	15	0	4	0	4	0	0	19
19.00	mir-30c-1	Homo sapiens	12	17	0	0	0	0	0	0	2	2	19
19.00	mir-147b	Homo sapiens	0	0	0	0	0	19	0	19	0	0	19
18.00	let-7d	Homo sapiens	0	17	0	17	0	1	0	1	0	0	18
18.00	mir-24-2	Homo sapiens	0	13	0	13	0	4	0	0	1	1	18
18.00	mir-32	Homo sapiens	12	15	12	15	0	3	0	3	0	0	18
18.00	mir-449b	Homo sapiens	13	18	13	16	0	0	0	0	0	0	18
18.00	mir-769	Homo sapiens	6	18	6	18	0	0	0	0	0	0	18
18.00	mir-941-2	Homo sapiens	0	0	0	0	15	18	0	0	0	0	18
17.00	mir-126	Homo sapiens	0	0	0	0	4	17	4	17	0	0	17
17.00	mir-941-4	Homo sapiens	0	0	0	0	15	17	0	0	0	0	17
16.00	mir-23a	Homo sapiens	0	1	0	1	0	15	0	15	0	0	16
16.00	mir-10a	Homo sapiens	4	15	4	14	0	0	0	0	1	1	16
16.00	mir-181b-1	Homo sapiens	4	9	0	0	0	0	0	0	7	7	16
16.00	mir-941-5	Homo sapiens	0	0	0	0	14	16	0	0	0	0	16
15.00	mir-1246	Homo sapiens	0	15	0	15	0	0	0	0	0	0	15
13.00	mir-218-1	Homo sapiens	6	13	0	0	0	0	0	0	0	0	13
13.00	mir-455	Homo sapiens	0	6	0	6	0	1	0	1	0	6	13
13.00	mir-320b-1	Homo sapiens	0	0	0	0	0	13	0	0	0	0	13
12.00	mir-132	Homo sapiens	0	4	0	4	0	5	0	5	3	3	12
12.00	mir-1301	Homo sapiens	0	0	0	0	5	11	5	11	1	1	12
11.00	mir-103b-1	Homo sapiens	8	11	0	0	0	0	0	0	0	0	11
11.00	mir-4664	Homo sapiens	0	0	0	0	0	11	0	11	0	0	11
10.00	mir-511	Homo sapiens	2	10	2	10	0	0	0	0	0	0	10
10.00	mir-103b-2	Homo sapiens	8	10	0	0	0	0	0	0	0	0	10
9.00	mir-24-1	Homo sapiens	0	2	0	2	0	7	0	0	0	0	9
9.00	mir-218-2	Homo sapiens	5	9	0	0	0	0	0	0	0	0	9
9.00	mir-30b	Homo sapiens	0	7	0	7	0	0	0	0	1	2	9
9.00	mir-9-1	Homo sapiens	1	6	0	0	0	0	0	0	3	3	9
9.00	mir-9-2	Homo sapiens	2	7	0	0	0	0	0	0	2	2	9
9.00	mir-345	Homo sapiens	3	9	3	9	0	0	0	0	0	0	9
9.00	mir-451a	Homo sapiens	0	9	0	9	0	0	0	0	0	0	9
9.00	mir-320b-2	Homo sapiens	0	0	0	0	0	9	0	0	0	0	9
9.00	mir-1285-1	Homo sapiens	0	0	0	0	0	1	0	0	0	8	9
9.00	mir-642b	Homo sapiens	4	9	4	9	0	0	0	0	0	0	9
9.00	mir-378i	Homo sapiens	0	9	0	9	0	0	0	0	0	0	9
8.00	mir-16-1	Homo sapiens	2	8	0	0	0	0	0	0	0	0	8
8.00	mir-223	Homo sapiens	0	2	0	2	1	6	1	6	0	0	8
8.00	mir-9-3	Homo sapiens	1	6	0	0	0	0	0	0	1	2	8
8.00	mir-149	Homo sapiens	1	8	1	8	0	0	0	0	0	0	8
8.00	mir-330	Homo sapiens	0	3	0	3	0	5	0	5	0	0	8
8.00	mir-328	Homo sapiens	0	0	0	0	3	8	3	8	0	0	8
8.00	mir-339	Homo sapiens	0	0	0	0	1	8	1	8	0	0	8
8.00	mir-514a-3	Homo sapiens	0	0	0	0	5	8	0	0	0	0	8
8.00	mir-4446	Homo sapiens	0	0	0	0	1	8	1	8	0	0	8
7.00	mir-10b	Homo sapiens	0	7	0	7	0	0	0	0	0	0	7
7.00	mir-210	Homo sapiens	0	0	0	0	4	6	4	6	0	1	7
7.00	mir-499a	Homo sapiens	0	7	0	7	0	0	0	0	0	0	7
7.00	mir-589	Homo sapiens	0	7	0	7	0	0	0	0	0	0	7
7.00	mir-374b	Homo sapiens	2	7	2	6	0	0	0	0	0	0	7
7.00	mir-3665	Homo sapiens	0	0	0	0	0	0	0	0	0	7	7
7.00	mir-6842	Homo sapiens	0	0	0	0	4	7	4	7	0	0	7
7.00	mir-8086	Homo sapiens	0	0	0	0	0	0	0	0	1	7	7
6.00	let-7e	Homo sapiens	0	5	0	4	0	0	0	0	1	1	6
6.00	mir-29b-1	Homo sapiens	0	0	0	0	1	2	0	0	4	4	6
6.00	mir-629	Homo sapiens	3	6	3	6	0	0	0	0	0	0	6
6.00	mir-660	Homo sapiens	3	6	3	6	0	0	0	0	0	0	6
6.00	mir-190b	Homo sapiens	0	6	0	6	0	0	0	0	0	0	6
6.00	mir-548o	Homo sapiens	0	0	0	0	6	6	0	0	0	0	6
6.00	mir-3159	Homo sapiens	0	0	0	0	0	0	0	0	0	6	6
6.00	mir-4326	Homo sapiens	0	0	0	0	0	0	0	0	6	6	6
6.00	mir-548o-2	Homo sapiens	0	0	0	0	6	6	0	0	0	0	6
6.00	mir-4485	Homo sapiens	0	0	0	0	0	2	0	2	0	4	6
6.00	mir-6510	Homo sapiens	0	0	0	0	2	6	2	6	0	0	6
6.00	mir-7851	Homo sapiens	0	0	0	0	0	0	0	0	0	6	6
5.00	mir-29b-2	Homo sapiens	0	0	0	0	1	3	0	0	2	2	5
5.00	mir-374a	Homo sapiens	0	4	0	4	0	1	0	1	0	0	5
5.00	mir-452	Homo sapiens	0	2	0	2	0	0	0	0	3	3	5
5.00	mir-486-1	Homo sapiens	2	5	0	0	0	0	0	0	0	0	5
5.00	mir-625	Homo sapiens	0	5	0	5	0	0	0	0	0	0	5
5.00	mir-874	Homo sapiens	0	0	0	0	1	5	1	5	0	0	5
4.00	mir-501	Homo sapiens	0	0	0	0	0	4	0	4	0	0	4
4.00	mir-514a-1	Homo sapiens	0	0	0	0	4	4	0	0	0	0	4
4.00	mir-514a-2	Homo sapiens	0	0	0	0	4	4	0	0	0	0	4
4.00	mir-619	Homo sapiens	0	2	0	2	0	0	0	0	0	2	4
4.00	mir-671	Homo sapiens	0	0	0	0	2	4	2	4	0	0	4
4.00	mir-1292	Homo sapiens	1	1	1	1	0	0	0	0	3	3	4
4.00	mir-1306	Homo sapiens	0	0	0	0	0	2	0	2	1	2	4
4.00	mir-3158-1	Homo sapiens	0	4	0	0	0	0	0	0	0	0	4
4.00	mir-3158-2	Homo sapiens	0	4	0	0	0	0	0	0	0	0	4
4.00	mir-3065	Homo sapiens	0	4	0	4	0	0	0	0	0	0	4
4.00	mir-3605	Homo sapiens	0	4	0	4	0	0	0	0	0	0	4
4.00	mir-4430	Homo sapiens	0	0	0	0	0	0	0	0	0	4	4
4.00	mir-1269b	Homo sapiens	0	4	0	4	0	0	0	0	0	0	4
4.00	mir-486-2	Homo sapiens	2	4	0	0	0	0	0	0	0	0	4
3.00	mir-20a	Homo sapiens	3	3	3	3	0	0	0	0	0	0	3
3.00	mir-185	Homo sapiens	0	2	0	2	0	1	0	1	0	0	3
3.00	mir-335	Homo sapiens	0	2	0	2	1	1	1	1	0	0	3
3.00	mir-628	Homo sapiens	1	1	1	1	0	1	0	1	1	1	3
3.00	mir-509-3	Homo sapiens	2	3	2	3	0	0	0	0	0	0	3
3.00	mir-934	Homo sapiens	0	3	0	3	0	0	0	0	0	0	3
3.00	mir-548f-2	Homo sapiens	0	0	0	0	0	3	0	0	0	0	3
3.00	mir-3135a	Homo sapiens	0	0	0	0	0	0	0	0	0	3	3
3.00	mir-3614	Homo sapiens	0	1	0	1	0	0	0	0	2	2	3
3.00	mir-4488	Homo sapiens	0	3	0	3	0	0	0	0	0	0	3
3.00	mir-3529	Homo sapiens	0	0	0	0	0	0	0	0	3	3	3
3.00	mir-6501	Homo sapiens	0	3	0	3	0	0	0	0	0	0	3
2.00	mir-199a-1	Homo sapiens	1	1	0	0	0	1	0	0	0	0	2
2.00	mir-199a-2	Homo sapiens	1	1	0	0	0	1	0	0	0	0	2
2.00	mir-204	Homo sapiens	0	2	0	2	0	0	0	0	0	0	2
2.00	mir-15b	Homo sapiens	1	2	1	2	0	0	0	0	0	0	2
2.00	mir-127	Homo sapiens	0	0	0	0	0	2	0	2	0	0	2
2.00	mir-29c	Homo sapiens	0	0	0	0	0	0	0	0	2	2	2
2.00	mir-365a	Homo sapiens	0	2	0	2	0	0	0	0	0	0	2
2.00	mir-422a	Homo sapiens	0	2	0	2	0	0	0	0	0	0	2
2.00	mir-424	Homo sapiens	0	0	0	0	0	2	0	2	0	0	2
2.00	mir-484	Homo sapiens	1	2	1	2	0	0	0	0	0	0	2
2.00	mir-181d	Homo sapiens	0	1	0	1	0	0	0	0	1	1	2
2.00	mir-576	Homo sapiens	0	0	0	0	0	2	0	2	0	0	2
2.00	mir-584	Homo sapiens	0	2	0	2	0	0	0	0	0	0	2
2.00	mir-651	Homo sapiens	1	2	1	2	0	0	0	0	0	0	2
2.00	mir-944	Homo sapiens	0	0	0	0	0	2	0	2	0	0	2
2.00	mir-1293	Homo sapiens	0	2	0	2	0	0	0	0	0	0	2
2.00	mir-1299	Homo sapiens	0	0	0	0	0	1	0	1	1	1	2
2.00	mir-548f-3	Homo sapiens	0	0	0	0	0	2	0	0	0	0	2
2.00	mir-1249	Homo sapiens	0	0	0	0	0	2	0	2	0	0	2
2.00	mir-3163	Homo sapiens	0	2	0	2	0	0	0	0	0	0	2
2.00	mir-3616	Homo sapiens	0	2	0	2	0	0	0	0	0	0	2
2.00	mir-3913-1	Homo sapiens	0	2	0	0	0	0	0	0	0	0	2
2.00	mir-3913-2	Homo sapiens	0	2	0	0	0	0	0	0	0	0	2
2.00	mir-3929	Homo sapiens	0	0	0	0	0	0	0	0	0	2	2
2.00	mir-378f	Homo sapiens	0	0	0	0	0	2	0	2	0	0	2
2.00	mir-664b	Homo sapiens	2	2	2	2	0	0	0	0	0	0	2
2.00	mir-5585	Homo sapiens	0	0	0	0	0	2	0	2	0	0	2
2.00	mir-5689	Homo sapiens	0	0	0	0	0	0	0	0	0	2	2
2.00	mir-6499	Homo sapiens	0	2	0	2	0	0	0	0	0	0	2
2.00	mir-548az	Homo sapiens	0	2	0	2	0	0	0	0	0	0	2
2.00	mir-6503	Homo sapiens	0	0	0	0	0	2	0	2	0	0	2
2.00	mir-6837	Homo sapiens	0	0	0	0	0	2	0	2	0	0	2
1.00	mir-17	Homo sapiens	0	1	0	1	0	0	0	0	0	0	1
1.00	mir-19a	Homo sapiens	0	0	0	0	0	1	0	1	0	0	1
1.00	mir-19b-2	Homo sapiens	0	0	0	0	0	1	0	0	0	0	1
1.00	mir-103a-2	Homo sapiens	0	0	0	0	0	0	0	0	0	1	1
1.00	mir-197	Homo sapiens	0	0	0	0	1	1	1	1	0	0	1
1.00	mir-34a	Homo sapiens	0	1	0	1	0	0	0	0	0	0	1
1.00	mir-181c	Homo sapiens	0	0	0	0	0	1	0	1	0	0	1
1.00	mir-199b	Homo sapiens	0	0	0	0	0	1	0	0	0	0	1
1.00	mir-203a	Homo sapiens	0	0	0	0	0	1	0	1	0	0	1
1.00	mir-211	Homo sapiens	1	1	1	1	0	0	0	0	0	0	1
1.00	mir-215	Homo sapiens	0	1	0	1	0	0	0	0	0	0	1
1.00	mir-153-1	Homo sapiens	0	0	0	0	0	1	0	0	0	0	1
1.00	mir-153-2	Homo sapiens	0	0	0	0	0	1	0	0	0	0	1
1.00	mir-188	Homo sapiens	0	1	0	1	0	0	0	0	0	0	1
1.00	mir-193a	Homo sapiens	0	1	0	1	0	0	0	0	0	0	1
1.00	mir-194-1	Homo sapiens	0	1	0	0	0	0	0	0	0	0	1
1.00	mir-194-2	Homo sapiens	0	1	0	0	0	0	0	0	0	0	1
1.00	mir-296	Homo sapiens	0	0	0	0	0	1	0	1	0	0	1
1.00	mir-450a-1	Homo sapiens	0	1	0	0	0	0	0	0	0	0	1
1.00	mir-493	Homo sapiens	1	1	1	1	0	0	0	0	0	0	1
1.00	mir-193b	Homo sapiens	0	0	0	0	0	1	0	1	0	0	1
1.00	mir-505	Homo sapiens	1	1	1	1	0	0	0	0	0	0	1
1.00	mir-556	Homo sapiens	0	1	0	1	0	0	0	0	0	0	1
1.00	mir-581	Homo sapiens	0	1	0	1	0	0	0	0	0	0	1
1.00	mir-642a	Homo sapiens	0	1	0	1	0	0	0	0	0	0	1
1.00	mir-659	Homo sapiens	1	1	1	1	0	0	0	0	0	0	1
1.00	mir-421	Homo sapiens	0	0	0	0	0	1	0	1	0	0	1
1.00	mir-320c-1	Homo sapiens	0	0	0	0	0	1	0	0	0	0	1
1.00	mir-877	Homo sapiens	0	0	0	0	0	0	0	0	0	1	1
1.00	mir-760	Homo sapiens	0	0	0	0	0	1	0	1	0	0	1
1.00	mir-939	Homo sapiens	0	1	0	1	0	0	0	0	0	0	1
1.00	mir-942	Homo sapiens	0	1	0	1	0	0	0	0	0	0	1
1.00	mir-1285-2	Homo sapiens	0	0	0	0	0	0	0	0	0	1	1
1.00	mir-1289-1	Homo sapiens	0	0	0	0	0	0	0	0	1	1	1
1.00	mir-548l	Homo sapiens	0	1	0	1	0	0	0	0	0	0	1
1.00	mir-1248	Homo sapiens	0	0	0	0	0	0	0	0	1	1	1
1.00	mir-1262	Homo sapiens	0	1	0	1	0	0	0	0	0	0	1
1.00	mir-1269a	Homo sapiens	0	0	0	0	0	1	0	1	0	0	1
1.00	mir-1910	Homo sapiens	0	0	0	0	1	1	1	1	0	0	1
1.00	mir-3120	Homo sapiens	0	1	0	1	0	0	0	0	0	0	1
1.00	mir-3127	Homo sapiens	0	0	0	0	0	1	0	1	0	0	1
1.00	mir-548t	Homo sapiens	0	1	0	1	0	0	0	0	0	0	1
1.00	mir-3177	Homo sapiens	0	0	0	0	1	1	1	1	0	0	1
1.00	mir-3180-2	Homo sapiens	0	0	0	0	1	1	0	0	0	0	1
1.00	mir-3617	Homo sapiens	0	1	0	1	0	0	0	0	0	0	1
1.00	mir-3690-1	Homo sapiens	0	0	0	0	0	0	0	0	1	1	1
1.00	mir-3941	Homo sapiens	0	0	0	0	0	0	0	0	1	1	1
1.00	mir-4448	Homo sapiens	0	0	0	0	0	1	0	1	0	0	1
1.00	mir-4472-2	Homo sapiens	0	0	0	0	0	0	0	0	0	1	1
1.00	mir-4473	Homo sapiens	0	0	0	0	0	1	0	1	0	0	1
1.00	mir-4477a	Homo sapiens	0	0	0	0	0	1	0	1	0	0	1
1.00	mir-4529	Homo sapiens	0	0	0	0	0	0	0	0	1	1	1
1.00	mir-4746	Homo sapiens	0	1	0	1	0	0	0	0	0	0	1
1.00	mir-4776-1	Homo sapiens	1	1	0	0	0	0	0	0	0	0	1
1.00	mir-4781	Homo sapiens	0	0	0	0	0	1	0	1	0	0	1
1.00	mir-4999	Homo sapiens	0	1	0	1	0	0	0	0	0	0	1
1.00	mir-5701-2	Homo sapiens	0	1	0	0	0	0	0	0	0	0	1
1.00	mir-5787	Homo sapiens	0	1	0	1	0	0	0	0	0	0	1
1.00	mir-6500	Homo sapiens	0	0	0	0	1	1	1	1	0	0	1
1.00	mir-6744	Homo sapiens	0	0	0	0	0	0	0	0	0	1	1
1.00	mir-6843	Homo sapiens	0	0	0	0	0	1	0	1	0	0	1
1.00	mir-6882	Homo sapiens	0	0	0	0	0	0	0	0	1	1	1
1.00	mir-7704	Homo sapiens	0	1	0	1	0	0	0	0	0	0	1
1.00	mir-1273h	Homo sapiens	0	0	0	0	0	0	0	0	0	1	1
1.00	mir-8485	Homo sapiens	0	0	0	0	0	0	0	0	0	1	1
1.00	mir-3648-2	Homo sapiens	0	0	0	0	0	0	0	0	1	1	1
0.00	mir-19b-1	Homo sapiens	0	0	0	0	0	0	0	0	0	0	0
0.00	mir-103a-1	Homo sapiens	0	0	0	0	0	0	0	0	0	0	0
0.00	mir-450a-2	Homo sapiens	0	0	0	0	0	0	0	0	0	0	0
0.00	mir-320c-2	Homo sapiens	0	0	0	0	0	0	0	0	0	0	0
0.00	mir-3180-1	Homo sapiens	0	0	0	0	0	0	0	0	0	0	0
0.00	mir-3180-3	Homo sapiens	0	0	0	0	0	0	0	0	0	0	0
0.00	mir-3648-1	Homo sapiens	0	0	0	0	0	0	0	0	0	0	0
0.00	mir-4776-2	Homo sapiens	0	0	0	0	0	0	0	0	0	0	0
0.00	mir-5684	Homo sapiens	0	0	0	0	0	0	0	0	0	0	0
0.00	mir-5701-1	Homo sapiens	0	0	0	0	0	0	0	0	0	0	0
0.00	mir-3690-2	Homo sapiens	0	0	0	0	0	0	0	0	0	0	0
0.00	mir-5701-3	Homo sapiens	0	0	0	0	0	0	0	0	0	0	0

## Sheet: 3A
Expression values	Name	Resource	Exact mature 5'	Mature 5'	Unique exact mature 5'	Unique mature 5'	Exact mature 3'	Mature 3'	Unique exact mature 3'	Unique mature 3'	Exact other	Other	Total
13,684.00	mir-148a	Homo sapiens	3	3	3	3	12394	13672	12394	13652	7	9	13684
848.00	mir-21	Homo sapiens	248	840	248	840	0	0	0	0	8	8	848
837.00	mir-200a	Homo sapiens	51	107	51	107	0	728	0	728	2	2	837
780.00	mir-99a	Homo sapiens	3	777	3	777	0	0	0	0	3	3	780
757.00	mir-151a	Homo sapiens	1	2	1	2	488	751	488	751	4	4	757
712.00	let-7b	Homo sapiens	280	640	280	639	0	0	0	0	64	72	712
589.00	mir-34c	Homo sapiens	122	543	122	543	4	5	4	5	39	41	589
566.00	mir-375	Homo sapiens	0	0	0	0	124	560	124	560	5	6	566
496.00	mir-200b	Homo sapiens	5	8	5	8	34	487	34	487	0	1	496
428.00	mir-30d	Homo sapiens	44	418	44	418	0	0	0	0	9	10	428
383.00	let-7i	Homo sapiens	295	380	295	379	0	0	0	0	2	3	383
305.00	mir-423	Homo sapiens	144	270	144	270	6	29	6	29	5	6	305
224.00	mir-200c	Homo sapiens	0	0	0	0	66	223	66	221	1	1	224
214.00	mir-27b	Homo sapiens	0	0	0	0	9	212	9	210	0	2	214
158.00	mir-26a-1	Homo sapiens	128	158	0	0	0	0	0	0	0	0	158
152.00	mir-26a-2	Homo sapiens	128	152	0	0	0	0	0	0	0	0	152
107.00	mir-27a	Homo sapiens	0	0	0	0	0	107	0	106	0	0	107
105.00	mir-30a	Homo sapiens	11	68	11	68	5	21	5	19	15	16	105
102.00	mir-203b	Homo sapiens	0	102	0	102	0	0	0	0	0	0	102
98.00	mir-3074	Homo sapiens	0	95	0	95	0	3	0	3	0	0	98
97.00	let-7c	Homo sapiens	49	91	49	90	0	1	0	1	4	5	97
96.00	mir-183	Homo sapiens	61	96	61	96	0	0	0	0	0	0	96
84.00	mir-205	Homo sapiens	8	84	8	84	0	0	0	0	0	0	84
83.00	let-7g	Homo sapiens	28	83	28	83	0	0	0	0	0	0	83
78.00	mir-378a	Homo sapiens	0	0	0	0	1	78	1	78	0	0	78
72.00	mir-320a	Homo sapiens	0	0	0	0	23	69	23	66	2	3	72
67.00	let-7f-2	Homo sapiens	11	66	0	39	0	0	0	0	1	1	67
62.00	mir-146b	Homo sapiens	30	61	30	61	0	0	0	0	1	1	62
57.00	mir-92b	Homo sapiens	0	4	0	4	14	45	14	43	6	8	57
54.00	mir-361	Homo sapiens	0	0	0	0	3	52	3	52	2	2	54
52.00	mir-429	Homo sapiens	0	0	0	0	29	51	29	51	0	1	52
51.00	mir-22	Homo sapiens	0	1	0	1	19	47	19	47	3	3	51
48.00	mir-128-1	Homo sapiens	0	0	0	0	5	48	0	24	0	0	48
42.00	mir-184	Homo sapiens	0	0	0	0	27	40	27	40	2	2	42
40.00	mir-100	Homo sapiens	0	40	0	40	0	0	0	0	0	0	40
38.00	mir-146a	Homo sapiens	10	38	10	37	0	0	0	0	0	0	38
37.00	let-7f-1	Homo sapiens	11	34	0	0	0	0	0	0	2	3	37
37.00	mir-25	Homo sapiens	0	0	0	0	13	36	13	36	0	1	37
36.00	mir-30e	Homo sapiens	0	10	0	9	12	17	12	14	8	9	36
31.00	mir-29a	Homo sapiens	0	0	0	0	0	28	0	28	3	3	31
29.00	mir-148b	Homo sapiens	0	0	0	0	4	29	4	12	0	0	29
28.00	mir-224	Homo sapiens	0	19	0	19	0	3	0	3	5	6	28
28.00	mir-1180	Homo sapiens	0	0	0	0	14	27	14	27	1	1	28
27.00	mir-192	Homo sapiens	4	23	4	23	0	0	0	0	2	4	27
27.00	mir-99b	Homo sapiens	5	25	5	25	0	1	0	1	1	1	27
25.00	let-7a-2	Homo sapiens	3	24	0	0	0	0	0	0	1	1	25
25.00	mir-128-2	Homo sapiens	0	0	0	0	5	25	0	2	0	0	25
24.00	let-7a-3	Homo sapiens	4	22	0	0	0	2	0	0	0	0	24
24.00	mir-140	Homo sapiens	0	1	0	1	2	14	2	14	2	9	24
23.00	let-7a-1	Homo sapiens	4	22	0	0	0	0	0	0	0	1	23
23.00	mir-222	Homo sapiens	0	0	0	0	4	10	4	10	11	13	23
23.00	mir-191	Homo sapiens	17	23	17	23	0	0	0	0	0	0	23
22.00	mir-34b	Homo sapiens	0	1	0	1	2	20	2	20	1	1	22
22.00	mir-190b	Homo sapiens	3	22	3	22	0	0	0	0	0	0	22
22.00	mir-2110	Homo sapiens	0	7	0	7	0	0	0	0	6	15	22
22.00	mir-3184	Homo sapiens	0	14	0	14	0	0	0	0	7	8	22
20.00	mir-182	Homo sapiens	2	14	2	14	0	0	0	0	6	6	20
20.00	mir-141	Homo sapiens	1	1	1	1	0	17	0	16	2	2	20
19.00	mir-92a-2	Homo sapiens	0	0	0	0	7	19	0	1	0	0	19
19.00	mir-125a	Homo sapiens	0	16	0	16	0	0	0	0	3	3	19
18.00	mir-340	Homo sapiens	11	14	11	14	1	4	1	4	0	0	18
18.00	mir-449c	Homo sapiens	6	18	6	18	0	0	0	0	0	0	18
17.00	mir-532	Homo sapiens	12	17	12	17	0	0	0	0	0	0	17
15.00	mir-671	Homo sapiens	0	0	0	0	3	12	3	12	0	3	15
14.00	mir-28	Homo sapiens	0	0	0	0	6	14	6	14	0	0	14
14.00	mir-92a-1	Homo sapiens	0	0	0	0	8	14	0	0	0	0	14
13.00	mir-10a	Homo sapiens	0	13	0	13	0	0	0	0	0	0	13
13.00	mir-101-2	Homo sapiens	0	0	0	0	2	13	0	3	0	0	13
12.00	mir-95	Homo sapiens	0	0	0	0	0	12	0	12	0	0	12
12.00	mir-101-1	Homo sapiens	0	0	0	0	2	12	0	0	0	0	12
12.00	mir-708	Homo sapiens	0	0	0	0	0	12	0	12	0	0	12
11.00	mir-181a-2	Homo sapiens	0	8	0	0	2	2	2	2	1	1	11
11.00	mir-181a-1	Homo sapiens	0	8	0	0	0	1	0	1	2	2	11
11.00	mir-186	Homo sapiens	4	11	4	11	0	0	0	0	0	0	11
11.00	mir-449a	Homo sapiens	7	11	7	11	0	0	0	0	0	0	11
10.00	mir-582	Homo sapiens	0	0	0	0	10	10	10	10	0	0	10
9.00	mir-26b	Homo sapiens	2	9	2	9	0	0	0	0	0	0	9
9.00	mir-342	Homo sapiens	2	9	2	9	0	0	0	0	0	0	9
9.00	mir-3615	Homo sapiens	0	0	0	0	0	9	0	9	0	0	9
9.00	mir-1843	Homo sapiens	1	6	1	6	0	0	0	0	0	3	9
8.00	mir-152	Homo sapiens	0	0	0	0	2	8	2	8	0	0	8
8.00	mir-509-3	Homo sapiens	3	8	3	8	0	0	0	0	0	0	8
8.00	mir-10400	Homo sapiens	0	8	0	8	0	0	0	0	0	0	8
7.00	mir-24-2	Homo sapiens	0	3	0	3	0	3	0	0	1	1	7
7.00	mir-16-2	Homo sapiens	0	2	0	0	0	5	0	5	0	0	7
7.00	mir-6510	Homo sapiens	0	0	0	0	1	7	1	7	0	0	7
6.00	mir-221	Homo sapiens	0	1	0	1	1	3	1	3	2	2	6
6.00	mir-106b	Homo sapiens	0	0	0	0	0	2	0	2	4	4	6
6.00	mir-320b-1	Homo sapiens	0	0	0	0	0	6	0	0	0	0	6
6.00	mir-1307	Homo sapiens	0	0	0	0	0	6	0	6	0	0	6
5.00	mir-125b-1	Homo sapiens	1	4	0	0	0	0	0	0	1	1	5
5.00	mir-142	Homo sapiens	0	0	0	0	0	1	0	1	2	4	5
5.00	mir-143	Homo sapiens	0	0	0	0	4	5	4	5	0	0	5
5.00	mir-155	Homo sapiens	0	3	0	3	0	0	0	0	1	2	5
5.00	mir-135b	Homo sapiens	4	5	4	5	0	0	0	0	0	0	5
5.00	mir-769	Homo sapiens	3	5	3	5	0	0	0	0	0	0	5
5.00	mir-744	Homo sapiens	0	5	0	5	0	0	0	0	0	0	5
4.00	mir-24-1	Homo sapiens	0	0	0	0	0	4	0	0	0	0	4
4.00	mir-7-2	Homo sapiens	2	4	0	0	0	0	0	0	0	0	4
4.00	mir-210	Homo sapiens	0	0	0	0	0	4	0	4	0	0	4
4.00	mir-150	Homo sapiens	3	4	3	4	0	0	0	0	0	0	4
4.00	mir-455	Homo sapiens	0	4	0	4	0	0	0	0	0	0	4
4.00	mir-628	Homo sapiens	0	0	0	0	0	4	0	4	0	0	4
4.00	mir-629	Homo sapiens	3	4	3	4	0	0	0	0	0	0	4
4.00	mir-1301	Homo sapiens	0	0	0	0	0	4	0	4	0	0	4
4.00	mir-3960	Homo sapiens	0	0	0	0	0	0	0	0	0	4	4
3.00	mir-218-1	Homo sapiens	1	3	0	0	0	0	0	0	0	0	3
3.00	mir-218-2	Homo sapiens	2	3	0	0	0	0	0	0	0	0	3
3.00	mir-132	Homo sapiens	0	0	0	0	0	2	0	2	1	1	3
3.00	mir-9-1	Homo sapiens	0	2	0	0	0	0	0	0	1	1	3
3.00	mir-149	Homo sapiens	0	3	0	3	0	0	0	0	0	0	3
3.00	mir-30c-1	Homo sapiens	2	3	0	0	0	0	0	0	0	0	3
3.00	mir-363	Homo sapiens	0	0	0	0	3	3	3	3	0	0	3
3.00	mir-425	Homo sapiens	0	3	0	3	0	0	0	0	0	0	3
3.00	mir-320b-2	Homo sapiens	0	0	0	0	0	3	0	0	0	0	3
3.00	mir-6843	Homo sapiens	0	0	0	0	0	3	0	3	0	0	3
2.00	mir-98	Homo sapiens	1	2	1	2	0	0	0	0	0	0	2
2.00	mir-197	Homo sapiens	0	0	0	0	0	2	0	2	0	0	2
2.00	mir-30c-2	Homo sapiens	1	1	0	0	0	1	0	1	0	0	2
2.00	mir-7-1	Homo sapiens	2	2	0	0	0	0	0	0	0	0	2
2.00	mir-7-3	Homo sapiens	2	2	0	0	0	0	0	0	0	0	2
2.00	mir-215	Homo sapiens	0	2	0	2	0	0	0	0	0	0	2
2.00	mir-9-2	Homo sapiens	0	1	0	0	0	0	0	0	1	1	2
2.00	mir-9-3	Homo sapiens	0	1	0	0	0	0	0	0	1	1	2
2.00	mir-125b-2	Homo sapiens	1	2	0	0	0	0	0	0	0	0	2
2.00	mir-193a	Homo sapiens	1	1	1	1	0	0	0	0	1	1	2
2.00	mir-339	Homo sapiens	0	0	0	0	1	2	1	2	0	0	2
2.00	mir-335	Homo sapiens	0	0	0	0	1	2	1	2	0	0	2
2.00	mir-422a	Homo sapiens	0	2	0	2	0	0	0	0	0	0	2
2.00	mir-499a	Homo sapiens	0	2	0	2	0	0	0	0	0	0	2
2.00	mir-501	Homo sapiens	0	0	0	0	0	2	0	2	0	0	2
2.00	mir-514a-1	Homo sapiens	0	0	0	0	2	2	0	0	0	0	2
2.00	mir-514a-2	Homo sapiens	0	0	0	0	2	2	0	0	0	0	2
2.00	mir-574	Homo sapiens	0	0	0	0	2	2	2	2	0	0	2
2.00	mir-651	Homo sapiens	0	2	0	2	0	0	0	0	0	0	2
2.00	mir-675	Homo sapiens	0	0	0	0	2	2	2	2	0	0	2
2.00	mir-874	Homo sapiens	0	0	0	0	2	2	2	2	0	0	2
2.00	mir-877	Homo sapiens	0	0	0	0	0	0	0	0	0	2	2
2.00	mir-934	Homo sapiens	0	2	0	2	0	0	0	0	0	0	2
2.00	mir-941-3	Homo sapiens	0	0	0	0	0	2	0	0	0	0	2
2.00	mir-548o	Homo sapiens	0	0	0	0	2	2	0	0	0	0	2
2.00	mir-642b	Homo sapiens	2	2	2	2	0	0	0	0	0	0	2
2.00	mir-4664	Homo sapiens	0	0	0	0	1	2	1	2	0	0	2
2.00	mir-6755	Homo sapiens	0	2	0	2	0	0	0	0	0	0	2
2.00	mir-7706	Homo sapiens	0	0	0	0	0	2	0	2	0	0	2
2.00	mir-8086	Homo sapiens	0	0	0	0	0	0	0	0	0	2	2
1.00	let-7d	Homo sapiens	0	1	0	1	0	0	0	0	0	0	1
1.00	let-7e	Homo sapiens	0	1	0	1	0	0	0	0	0	0	1
1.00	mir-16-1	Homo sapiens	0	1	0	0	0	0	0	0	0	0	1
1.00	mir-20a	Homo sapiens	1	1	1	1	0	0	0	0	0	0	1
1.00	mir-32	Homo sapiens	1	1	1	1	0	0	0	0	0	0	1
1.00	mir-199a-1	Homo sapiens	0	0	0	0	0	1	0	0	0	0	1
1.00	mir-181b-1	Homo sapiens	0	1	0	0	0	0	0	0	0	0	1
1.00	mir-211	Homo sapiens	1	1	1	1	0	0	0	0	0	0	1
1.00	mir-223	Homo sapiens	0	0	0	0	0	1	0	1	0	0	1
1.00	mir-23b	Homo sapiens	0	1	0	1	0	0	0	0	0	0	1
1.00	mir-126	Homo sapiens	0	0	0	0	1	1	1	1	0	0	1
1.00	mir-194-1	Homo sapiens	0	1	0	0	0	0	0	0	0	0	1
1.00	mir-181b-2	Homo sapiens	0	0	0	0	0	0	0	0	1	1	1
1.00	mir-365a	Homo sapiens	0	0	0	0	0	1	0	0	0	0	1
1.00	mir-365b	Homo sapiens	0	0	0	0	0	1	0	0	0	0	1
1.00	mir-374a	Homo sapiens	0	1	0	1	0	0	0	0	0	0	1
1.00	mir-330	Homo sapiens	0	0	0	0	0	1	0	1	0	0	1
1.00	mir-345	Homo sapiens	0	1	0	1	0	0	0	0	0	0	1
1.00	mir-451a	Homo sapiens	0	1	0	1	0	0	0	0	0	0	1
1.00	mir-452	Homo sapiens	1	1	1	1	0	0	0	0	0	0	1
1.00	mir-511	Homo sapiens	0	1	0	1	0	0	0	0	0	0	1
1.00	mir-514a-3	Homo sapiens	0	0	0	0	1	1	0	0	0	0	1
1.00	mir-556	Homo sapiens	0	0	0	0	0	1	0	1	0	0	1
1.00	mir-589	Homo sapiens	0	1	0	1	0	0	0	0	0	0	1
1.00	mir-642a	Homo sapiens	0	0	0	0	0	0	0	0	0	1	1
1.00	mir-652	Homo sapiens	0	0	0	0	1	1	1	1	0	0	1
1.00	mir-449b	Homo sapiens	0	1	0	1	0	0	0	0	0	0	1
1.00	mir-320c-1	Homo sapiens	0	0	0	0	1	1	0	0	0	0	1
1.00	mir-147b	Homo sapiens	0	0	0	0	0	1	0	1	0	0	1
1.00	mir-887	Homo sapiens	0	1	0	1	0	0	0	0	0	0	1
1.00	mir-873	Homo sapiens	0	0	0	0	0	0	0	0	1	1	1
1.00	mir-374b	Homo sapiens	1	1	1	1	0	0	0	0	0	0	1
1.00	mir-941-1	Homo sapiens	0	0	0	0	1	1	0	0	0	0	1
1.00	mir-941-4	Homo sapiens	0	0	0	0	0	1	0	0	0	0	1
1.00	mir-1285-2	Homo sapiens	0	0	0	0	0	0	0	0	0	1	1
1.00	mir-1304	Homo sapiens	0	0	0	0	0	0	0	0	0	1	1
1.00	mir-1262	Homo sapiens	0	1	0	1	0	0	0	0	0	0	1
1.00	mir-548n	Homo sapiens	0	0	0	0	0	0	0	0	0	1	1
1.00	mir-548q	Homo sapiens	0	1	0	1	0	0	0	0	0	0	1
1.00	mir-3158-1	Homo sapiens	0	1	0	0	0	0	0	0	0	0	1
1.00	mir-3159	Homo sapiens	0	0	0	0	0	0	0	0	0	1	1
1.00	mir-3679	Homo sapiens	0	0	0	0	0	0	0	0	0	1	1
1.00	mir-3913-2	Homo sapiens	0	1	0	0	0	0	0	0	0	0	1
1.00	mir-676	Homo sapiens	0	0	0	0	0	1	0	1	0	0	1
1.00	mir-548o-2	Homo sapiens	0	0	0	0	1	1	0	0	0	0	1
1.00	mir-4446	Homo sapiens	0	0	0	0	1	1	1	1	0	0	1
1.00	mir-548ah	Homo sapiens	0	0	0	0	1	1	1	1	0	0	1
1.00	mir-4508	Homo sapiens	0	0	0	0	0	0	0	0	0	1	1
1.00	mir-4708	Homo sapiens	0	0	0	0	0	1	0	1	0	0	1
1.00	mir-4742	Homo sapiens	0	0	0	0	0	1	0	1	0	0	1
1.00	mir-4750	Homo sapiens	0	1	0	1	0	0	0	0	0	0	1
1.00	mir-4776-2	Homo sapiens	1	1	0	0	0	0	0	0	0	0	1
1.00	mir-6747	Homo sapiens	0	0	0	0	0	1	0	1	0	0	1
1.00	mir-6842	Homo sapiens	0	0	0	0	1	1	1	1	0	0	1
1.00	mir-3690-2	Homo sapiens	0	0	0	0	0	0	0	0	1	1	1
1.00	mir-8072	Homo sapiens	0	0	0	0	0	0	0	0	0	1	1
1.00	mir-9903	Homo sapiens	0	0	0	0	0	1	0	1	0	0	1
1.00	mir-10395	Homo sapiens	0	0	0	0	0	1	0	1	0	0	1
1.00	mir-12136	Homo sapiens	0	1	0	1	0	0	0	0	0	0	1
0.00	mir-199a-2	Homo sapiens	0	0	0	0	0	0	0	0	0	0	0
0.00	mir-199b	Homo sapiens	0	0	0	0	0	0	0	0	0	0	0
0.00	mir-194-2	Homo sapiens	0	0	0	0	0	0	0	0	0	0	0
0.00	mir-548c	Homo sapiens	0	0	0	0	0	0	0	0	0	0	0
0.00	mir-548d-1	Homo sapiens	0	0	0	0	0	0	0	0	0	0	0
0.00	mir-548d-2	Homo sapiens	0	0	0	0	0	0	0	0	0	0	0
0.00	mir-941-2	Homo sapiens	0	0	0	0	0	0	0	0	0	0	0
0.00	mir-548h-2	Homo sapiens	0	0	0	0	0	0	0	0	0	0	0
0.00	mir-548h-4	Homo sapiens	0	0	0	0	0	0	0	0	0	0	0
0.00	mir-548i-1	Homo sapiens	0	0	0	0	0	0	0	0	0	0	0
0.00	mir-548i-2	Homo sapiens	0	0	0	0	0	0	0	0	0	0	0
0.00	mir-548i-4	Homo sapiens	0	0	0	0	0	0	0	0	0	0	0
0.00	mir-320c-2	Homo sapiens	0	0	0	0	0	0	0	0	0	0	0
0.00	mir-548t	Homo sapiens	0	0	0	0	0	0	0	0	0	0	0
0.00	mir-3158-2	Homo sapiens	0	0	0	0	0	0	0	0	0	0	0
0.00	mir-548w	Homo sapiens	0	0	0	0	0	0	0	0	0	0	0
0.00	mir-3690-1	Homo sapiens	0	0	0	0	0	0	0	0	0	0	0
0.00	mir-3913-1	Homo sapiens	0	0	0	0	0	0	0	0	0	0	0
0.00	mir-548z	Homo sapiens	0	0	0	0	0	0	0	0	0	0	0
0.00	mir-548aa-1	Homo sapiens	0	0	0	0	0	0	0	0	0	0	0
0.00	mir-548aa-2	Homo sapiens	0	0	0	0	0	0	0	0	0	0	0
0.00	mir-548ab	Homo sapiens	0	0	0	0	0	0	0	0	0	0	0
0.00	mir-548ac	Homo sapiens	0	0	0	0	0	0	0	0	0	0	0
0.00	mir-548ad	Homo sapiens	0	0	0	0	0	0	0	0	0	0	0
0.00	mir-548am	Homo sapiens	0	0	0	0	0	0	0	0	0	0	0
0.00	mir-548an	Homo sapiens	0	0	0	0	0	0	0	0	0	0	0
0.00	mir-4776-1	Homo sapiens	0	0	0	0	0	0	0	0	0	0	0
0.00	mir-548ap	Homo sapiens	0	0	0	0	0	0	0	0	0	0	0
0.00	mir-548ay	Homo sapiens	0	0	0	0	0	0	0	0	0	0	0
0.00	mir-548az	Homo sapiens	0	0	0	0	0	0	0	0	0	0	0
0.00	mir-7851	Homo sapiens	0	0	0	0	0	0	0	0	0	0	0
0.00	mir-941-5	Homo sapiens	0	0	0	0	0	0	0	0	0	0	0

## Sheet: 5A
Expression values	Name	Resource	Exact mature 5'	Mature 5'	Unique exact mature 5'	Unique mature 5'	Exact mature 3'	Mature 3'	Unique exact mature 3'	Unique mature 3'	Exact other	Other	Total
18,410.00	mir-148a	Homo sapiens	6	12	6	12	16247	18349	16247	18319	45	49	18410
10,781.00	mir-21	Homo sapiens	3994	10655	3994	10655	0	0	0	0	114	126	10781
6,008.00	mir-34c	Homo sapiens	804	5429	804	5429	32	54	32	54	496	525	6008
4,590.00	mir-200a	Homo sapiens	96	162	96	162	1	4408	1	4400	18	20	4590
3,411.00	mir-200b	Homo sapiens	10	59	10	59	969	3335	969	3330	11	17	3411
2,620.00	mir-99a	Homo sapiens	13	2610	13	2608	0	1	0	1	8	9	2620
2,072.00	mir-27b	Homo sapiens	0	0	0	0	93	2072	93	2064	0	0	2072
2,011.00	let-7i	Homo sapiens	1346	1958	1346	1951	0	0	0	0	47	53	2011
1,921.00	mir-27a	Homo sapiens	13	22	13	22	6	1898	6	1887	1	1	1921
1,855.00	mir-200c	Homo sapiens	0	0	0	0	506	1773	506	1767	77	82	1855
1,801.00	let-7g	Homo sapiens	471	1790	471	1779	0	0	0	0	10	11	1801
1,651.00	mir-151a	Homo sapiens	45	71	45	71	1034	1572	1034	1572	5	8	1651
1,603.00	mir-375	Homo sapiens	0	0	0	0	402	1479	402	1479	110	124	1603
1,513.00	mir-30d	Homo sapiens	320	1478	320	1477	0	5	0	3	27	30	1513
1,373.00	mir-3960	Homo sapiens	0	0	0	0	0	52	0	52	1	1321	1373
1,292.00	let-7b	Homo sapiens	438	1090	438	1086	1	5	1	5	194	197	1292
1,089.00	mir-10400	Homo sapiens	0	1089	0	1089	0	0	0	0	0	0	1089
1,084.00	mir-146a	Homo sapiens	404	1081	404	1066	0	0	0	0	3	3	1084
1,066.00	mir-3074	Homo sapiens	1	1061	1	1061	0	5	0	5	0	0	1066
999.00	let-7f-2	Homo sapiens	278	989	0	34	0	0	0	0	8	10	999
980.00	let-7f-1	Homo sapiens	278	964	0	8	0	2	0	2	11	14	980
951.00	mir-8072	Homo sapiens	0	0	0	0	0	0	0	0	0	951	951
859.00	mir-26a-1	Homo sapiens	661	853	0	0	0	0	0	0	6	6	859
856.00	mir-26a-2	Homo sapiens	662	845	0	0	0	4	0	4	6	7	856
806.00	mir-92b	Homo sapiens	0	24	0	24	109	675	109	662	77	107	806
751.00	mir-22	Homo sapiens	0	33	0	33	274	647	274	647	66	71	751
582.00	mir-429	Homo sapiens	0	0	0	0	259	574	259	574	8	8	582
553.00	let-7a-3	Homo sapiens	114	535	0	0	0	1	0	0	13	17	553
552.00	let-7a-1	Homo sapiens	115	533	0	0	0	1	0	0	12	18	552
544.00	let-7a-2	Homo sapiens	114	531	0	0	0	0	0	0	12	13	544
506.00	mir-25	Homo sapiens	0	0	0	0	307	505	307	505	0	1	506
471.00	mir-142	Homo sapiens	30	99	30	99	2	27	2	27	310	345	471
442.00	mir-423	Homo sapiens	56	150	56	150	109	246	109	246	44	46	442
439.00	mir-146b	Homo sapiens	176	436	176	423	0	1	0	1	2	2	439
427.00	mir-125a	Homo sapiens	15	365	15	365	0	4	0	4	48	58	427
410.00	mir-26b	Homo sapiens	236	409	236	409	1	1	1	1	0	0	410
403.00	mir-30a	Homo sapiens	84	320	84	320	10	67	10	62	14	16	403
386.00	mir-143	Homo sapiens	0	2	0	2	255	384	255	384	0	0	386
348.00	mir-203b	Homo sapiens	0	347	0	347	0	1	0	1	0	0	348
337.00	mir-191	Homo sapiens	97	306	97	306	0	2	0	2	27	29	337
330.00	let-7c	Homo sapiens	162	300	162	293	0	0	0	0	27	30	330
322.00	mir-29a	Homo sapiens	0	0	0	0	13	274	13	274	44	48	322
290.00	mir-378a	Homo sapiens	1	2	1	2	1	288	1	288	0	0	290
285.00	mir-222	Homo sapiens	0	0	0	0	140	257	140	257	24	28	285
273.00	mir-30e	Homo sapiens	56	184	56	184	36	64	36	62	19	25	273
247.00	mir-100	Homo sapiens	4	244	4	241	0	0	0	0	3	3	247
245.00	mir-101-2	Homo sapiens	0	0	0	0	36	240	0	8	4	5	245
236.00	mir-1246	Homo sapiens	12	234	12	234	0	0	0	0	0	2	236
230.00	mir-101-1	Homo sapiens	0	0	0	0	37	224	0	0	4	6	230
224.00	mir-128-1	Homo sapiens	0	0	0	0	66	224	0	74	0	0	224
222.00	mir-205	Homo sapiens	41	218	41	218	0	0	0	0	3	4	222
206.00	mir-183	Homo sapiens	115	204	115	204	0	0	0	0	0	2	206
204.00	mir-449a	Homo sapiens	122	198	122	193	0	0	0	0	5	6	204
192.00	mir-148b	Homo sapiens	0	1	0	1	80	190	80	156	1	1	192
189.00	mir-221	Homo sapiens	0	18	0	18	13	134	13	134	32	37	189
178.00	mir-140	Homo sapiens	15	18	15	18	13	126	13	126	8	34	178
173.00	mir-186	Homo sapiens	87	167	87	167	0	0	0	0	6	6	173
173.00	mir-34b	Homo sapiens	0	7	0	6	3	164	3	164	2	2	173
173.00	mir-99b	Homo sapiens	30	153	30	152	5	14	5	14	6	6	173
168.00	mir-320a	Homo sapiens	0	0	0	0	66	164	66	155	0	4	168
164.00	mir-152	Homo sapiens	0	0	0	0	39	161	39	161	0	3	164
160.00	mir-92a-1	Homo sapiens	0	0	0	0	69	160	0	14	0	0	160
159.00	mir-223	Homo sapiens	0	22	0	22	22	127	22	127	8	10	159
155.00	mir-449c	Homo sapiens	12	149	12	149	0	0	0	0	5	6	155
152.00	mir-128-2	Homo sapiens	0	0	0	0	65	152	0	0	0	0	152
151.00	mir-92a-2	Homo sapiens	0	0	0	0	69	150	0	3	0	1	151
150.00	mir-141	Homo sapiens	0	3	0	3	0	119	0	112	27	28	150
146.00	mir-181a-2	Homo sapiens	20	113	0	0	0	7	0	7	22	26	146
143.00	mir-181a-1	Homo sapiens	19	113	0	0	0	0	0	0	26	30	143
141.00	mir-532	Homo sapiens	117	140	117	140	0	0	0	0	0	1	141
140.00	mir-3159	Homo sapiens	0	0	0	0	0	0	0	0	28	140	140
134.00	mir-192	Homo sapiens	22	106	22	106	0	0	0	0	16	28	134
119.00	mir-2110	Homo sapiens	5	90	5	90	0	0	0	0	13	29	119
118.00	mir-340	Homo sapiens	55	105	55	105	2	13	2	13	0	0	118
116.00	mir-8086	Homo sapiens	0	0	0	0	0	0	0	0	5	116	116
109.00	mir-182	Homo sapiens	10	64	10	64	0	3	0	3	39	42	109
107.00	mir-1180	Homo sapiens	0	0	0	0	47	101	47	101	6	6	107
102.00	mir-125b-2	Homo sapiens	18	75	0	0	0	12	0	12	15	15	102
100.00	mir-28	Homo sapiens	0	26	0	26	31	72	31	72	1	2	100
100.00	mir-619	Homo sapiens	0	59	0	59	0	0	0	0	9	41	100
96.00	mir-1290	Homo sapiens	0	0	0	0	0	96	0	96	0	0	96
95.00	mir-224	Homo sapiens	0	62	0	62	0	0	0	0	30	33	95
95.00	mir-125b-1	Homo sapiens	17	76	0	1	0	1	0	1	16	18	95
93.00	mir-1285-1	Homo sapiens	0	2	0	2	0	2	0	0	11	89	93
89.00	let-7d	Homo sapiens	0	75	0	71	0	11	0	11	1	3	89
84.00	mir-155	Homo sapiens	0	69	0	69	0	0	0	0	11	15	84
79.00	mir-3615	Homo sapiens	0	0	0	0	0	74	0	74	0	5	79
74.00	mir-16-2	Homo sapiens	10	43	0	0	4	26	4	26	5	5	74
73.00	mir-361	Homo sapiens	1	9	1	9	2	55	2	55	7	9	73
66.00	mir-23a	Homo sapiens	0	0	0	0	0	65	0	65	1	1	66
66.00	mir-3184	Homo sapiens	0	19	0	19	0	0	0	0	45	47	66
60.00	mir-24-2	Homo sapiens	0	12	0	12	0	45	0	0	2	3	60
60.00	mir-150	Homo sapiens	35	56	35	56	0	4	0	4	0	0	60
60.00	mir-744	Homo sapiens	5	57	5	57	0	0	0	0	1	3	60
55.00	mir-106b	Homo sapiens	0	2	0	2	4	47	4	47	5	6	55
54.00	mir-449b	Homo sapiens	0	53	0	50	0	0	0	0	0	1	54
46.00	mir-20a	Homo sapiens	41	46	41	46	0	0	0	0	0	0	46
46.00	mir-24-1	Homo sapiens	0	1	0	1	0	45	0	0	0	0	46
44.00	mir-16-1	Homo sapiens	11	42	0	0	0	0	0	0	2	2	44
44.00	mir-98	Homo sapiens	12	44	12	44	0	0	0	0	0	0	44
44.00	mir-190b	Homo sapiens	23	44	23	44	0	0	0	0	0	0	44
39.00	mir-582	Homo sapiens	0	1	0	1	18	32	18	32	6	6	39
38.00	mir-3929	Homo sapiens	0	0	0	0	0	0	0	0	0	38	38
37.00	mir-103b-1	Homo sapiens	21	36	0	0	0	0	0	0	1	1	37
34.00	mir-197	Homo sapiens	0	0	0	0	10	33	10	33	1	1	34
33.00	mir-103b-2	Homo sapiens	20	33	0	0	0	0	0	0	0	0	33
32.00	mir-328	Homo sapiens	0	0	0	0	19	32	19	32	0	0	32
32.00	mir-342	Homo sapiens	2	16	2	16	4	15	4	15	1	1	32
32.00	mir-425	Homo sapiens	3	24	3	24	1	5	1	5	1	3	32
32.00	mir-769	Homo sapiens	12	30	12	30	0	0	0	0	2	2	32
32.00	mir-1307	Homo sapiens	7	9	7	9	0	23	0	23	0	0	32
30.00	mir-451a	Homo sapiens	1	30	1	30	0	0	0	0	0	0	30
30.00	mir-4430	Homo sapiens	0	0	0	0	0	0	0	0	0	30	30
29.00	mir-30c-1	Homo sapiens	11	23	0	0	0	0	0	0	6	6	29
28.00	mir-30c-2	Homo sapiens	12	20	0	0	0	3	0	3	5	5	28
28.00	mir-452	Homo sapiens	5	9	5	9	0	0	0	0	19	19	28
28.00	mir-1843	Homo sapiens	1	24	1	24	0	0	0	0	0	4	28
27.00	mir-181b-2	Homo sapiens	4	13	0	0	0	0	0	0	13	14	27
26.00	mir-181b-1	Homo sapiens	3	13	0	0	0	0	0	0	13	13	26
26.00	mir-629	Homo sapiens	16	26	16	26	0	0	0	0	0	0	26
25.00	mir-3665	Homo sapiens	0	0	0	0	0	0	0	0	1	25	25
25.00	mir-7851	Homo sapiens	0	0	0	0	0	0	0	0	0	25	25
24.00	mir-7-1	Homo sapiens	7	22	0	0	0	0	0	0	2	2	24
24.00	mir-23b	Homo sapiens	1	6	1	6	0	9	0	9	7	9	24
23.00	mir-7-3	Homo sapiens	6	21	0	0	0	0	0	0	2	2	23
23.00	mir-1273h	Homo sapiens	0	0	0	0	0	1	0	1	1	22	23
22.00	mir-625	Homo sapiens	0	20	0	20	0	2	0	2	0	0	22
22.00	mir-941-1	Homo sapiens	0	0	0	0	13	21	0	0	1	1	22
22.00	mir-941-3	Homo sapiens	0	0	0	0	12	21	0	0	1	1	22
21.00	mir-484	Homo sapiens	5	17	5	17	0	0	0	0	4	4	21
21.00	mir-652	Homo sapiens	0	0	0	0	7	21	7	21	0	0	21
20.00	mir-7-2	Homo sapiens	7	18	0	0	0	0	0	0	2	2	20
20.00	mir-941-5	Homo sapiens	0	0	0	0	12	19	0	0	1	1	20
19.00	mir-96	Homo sapiens	11	17	11	17	0	0	0	0	0	2	19
19.00	mir-199b	Homo sapiens	3	7	3	7	0	11	0	0	1	1	19
19.00	mir-185	Homo sapiens	2	15	2	15	0	3	0	3	0	1	19
19.00	mir-363	Homo sapiens	0	0	0	0	7	19	7	19	0	0	19
19.00	mir-345	Homo sapiens	3	19	3	19	0	0	0	0	0	0	19
19.00	mir-501	Homo sapiens	0	0	0	0	0	13	0	13	5	6	19
19.00	mir-941-2	Homo sapiens	0	0	0	0	12	19	0	0	0	0	19
19.00	mir-941-4	Homo sapiens	0	0	0	0	12	19	0	0	0	0	19
18.00	mir-95	Homo sapiens	0	0	0	0	0	18	0	18	0	0	18
18.00	mir-193a	Homo sapiens	8	17	8	17	0	0	0	0	1	1	18
18.00	mir-339	Homo sapiens	1	2	1	2	4	16	4	16	0	0	18
18.00	mir-708	Homo sapiens	0	0	0	0	0	18	0	18	0	0	18
17.00	mir-31	Homo sapiens	0	17	0	17	0	0	0	0	0	0	17
17.00	mir-218-1	Homo sapiens	10	17	0	0	0	0	0	0	0	0	17
17.00	mir-184	Homo sapiens	0	0	0	0	14	17	14	17	0	0	17
17.00	mir-7706	Homo sapiens	0	0	0	0	0	16	0	16	1	1	17
16.00	mir-132	Homo sapiens	4	7	4	7	1	7	1	7	2	2	16
16.00	mir-135b	Homo sapiens	14	16	14	16	0	0	0	0	0	0	16
16.00	mir-5684	Homo sapiens	0	2	0	2	0	0	0	0	1	14	16
15.00	mir-32	Homo sapiens	8	15	8	15	0	0	0	0	0	0	15
15.00	mir-29b-2	Homo sapiens	0	1	0	1	3	8	0	0	6	6	15
15.00	mir-199a-1	Homo sapiens	0	1	0	0	0	13	0	0	1	1	15
15.00	mir-218-2	Homo sapiens	10	15	0	0	0	0	0	0	0	0	15
15.00	mir-338	Homo sapiens	0	15	0	15	0	0	0	0	0	0	15
15.00	mir-378i	Homo sapiens	0	15	0	13	0	0	0	0	0	0	15
14.00	mir-511	Homo sapiens	5	14	5	14	0	0	0	0	0	0	14
14.00	mir-671	Homo sapiens	0	0	0	0	4	14	4	14	0	0	14
13.00	let-7e	Homo sapiens	0	12	0	9	0	0	0	0	1	1	13
13.00	mir-29b-1	Homo sapiens	0	0	0	0	3	8	0	0	4	5	13
13.00	mir-10a	Homo sapiens	1	13	1	13	0	0	0	0	0	0	13
13.00	mir-424	Homo sapiens	0	0	0	0	3	13	3	13	0	0	13
13.00	mir-574	Homo sapiens	0	0	0	0	9	10	9	10	3	3	13
13.00	mir-628	Homo sapiens	4	10	4	10	1	3	1	3	0	0	13
13.00	mir-10395	Homo sapiens	0	0	0	0	4	13	4	13	0	0	13
12.00	mir-199a-2	Homo sapiens	0	0	0	0	0	11	0	0	1	1	12
12.00	mir-374a	Homo sapiens	1	12	1	12	0	0	0	0	0	0	12
12.00	mir-499a	Homo sapiens	4	12	4	12	0	0	0	0	0	0	12
12.00	mir-6842	Homo sapiens	0	0	0	0	2	12	2	12	0	0	12
12.00	mir-3648-2	Homo sapiens	0	0	0	0	0	0	0	0	10	12	12
11.00	mir-15b	Homo sapiens	2	8	2	8	0	3	0	3	0	0	11
11.00	mir-9-1	Homo sapiens	0	6	0	0	0	0	0	0	4	5	11
11.00	mir-9-2	Homo sapiens	0	7	0	0	0	1	0	0	3	3	11
11.00	mir-9-3	Homo sapiens	0	6	0	0	0	0	0	0	5	5	11
11.00	mir-181d	Homo sapiens	5	5	5	5	0	0	0	0	6	6	11
11.00	mir-320b-1	Homo sapiens	0	0	0	0	0	11	0	0	0	0	11
11.00	mir-3648-1	Homo sapiens	0	0	0	0	0	0	0	0	9	11	11
11.00	mir-4472-2	Homo sapiens	0	0	0	0	0	0	0	0	2	11	11
10.00	mir-542	Homo sapiens	0	0	0	0	2	7	2	7	2	3	10
10.00	mir-1301	Homo sapiens	0	0	0	0	0	5	0	5	4	5	10
10.00	mir-1269a	Homo sapiens	0	0	0	0	2	10	2	10	0	0	10
10.00	mir-3135b	Homo sapiens	0	2	0	2	0	0	0	0	0	8	10
9.00	mir-330	Homo sapiens	0	1	0	1	1	6	1	6	0	2	9
9.00	mir-320b-2	Homo sapiens	0	0	0	0	0	9	0	0	0	0	9
8.00	mir-15a	Homo sapiens	1	7	1	7	0	0	0	0	0	1	8
8.00	mir-19b-2	Homo sapiens	0	0	0	0	0	8	0	0	0	0	8
8.00	mir-502	Homo sapiens	0	0	0	0	6	8	6	8	0	0	8
8.00	mir-764	Homo sapiens	0	1	0	1	0	0	0	0	0	7	8
8.00	mir-548e	Homo sapiens	0	0	0	0	3	8	3	8	0	0	8
8.00	mir-1268a	Homo sapiens	0	0	0	0	0	0	0	0	0	8	8
8.00	mir-486-2	Homo sapiens	2	7	0	0	0	1	0	0	0	0	8
8.00	mir-7704	Homo sapiens	0	8	0	8	0	0	0	0	0	0	8
7.00	mir-19b-1	Homo sapiens	0	0	0	0	0	7	0	0	0	0	7
7.00	mir-1304	Homo sapiens	0	3	0	3	0	0	0	0	0	4	7
7.00	mir-3613	Homo sapiens	3	7	3	7	0	0	0	0	0	0	7
7.00	mir-3614	Homo sapiens	0	6	0	6	0	0	0	0	0	1	7
7.00	mir-5588	Homo sapiens	0	0	0	0	0	0	0	0	1	7	7
6.00	mir-19a	Homo sapiens	0	0	0	0	0	6	0	6	0	0	6
6.00	mir-181c	Homo sapiens	3	3	3	3	0	3	0	3	0	0	6
6.00	mir-450a-1	Homo sapiens	0	6	0	0	0	0	0	0	0	0	6
6.00	mir-450a-2	Homo sapiens	1	6	0	0	0	0	0	0	0	0	6
6.00	mir-147b	Homo sapiens	0	2	0	2	0	4	0	4	0	0	6
6.00	mir-1285-2	Homo sapiens	0	0	0	0	0	1	0	0	0	5	6
6.00	mir-1273c	Homo sapiens	0	0	0	0	0	0	0	0	0	6	6
6.00	mir-4488	Homo sapiens	0	6	0	6	0	0	0	0	0	0	6
6.00	mir-6510	Homo sapiens	0	0	0	0	1	6	1	6	0	0	6
6.00	mir-10396a	Homo sapiens	0	0	0	0	0	0	0	0	6	6	6
6.00	mir-10396b	Homo sapiens	0	0	0	0	0	0	0	0	6	6	6
5.00	mir-30b	Homo sapiens	0	5	0	5	0	0	0	0	0	0	5
5.00	mir-29c	Homo sapiens	0	2	0	2	0	2	0	2	1	1	5
5.00	mir-335	Homo sapiens	0	2	0	2	1	3	1	3	0	0	5
5.00	mir-378c	Homo sapiens	0	2	0	2	0	0	0	0	2	3	5
5.00	mir-5585	Homo sapiens	0	0	0	0	0	3	0	3	0	2	5
5.00	mir-10399	Homo sapiens	0	2	0	2	0	2	0	2	1	1	5
4.00	mir-17	Homo sapiens	1	3	1	3	0	1	0	1	0	0	4
4.00	mir-126	Homo sapiens	0	0	0	0	1	4	1	4	0	0	4
4.00	mir-486-1	Homo sapiens	1	3	0	0	0	1	0	0	0	0	4
4.00	mir-503	Homo sapiens	0	0	0	0	0	0	0	0	3	4	4
4.00	mir-599	Homo sapiens	0	0	0	0	0	0	0	0	3	4	4
4.00	mir-374b	Homo sapiens	0	2	0	2	1	1	1	1	1	1	4
4.00	mir-1303	Homo sapiens	0	0	0	0	0	0	0	0	0	4	4
4.00	mir-4446	Homo sapiens	0	0	0	0	0	2	0	2	2	2	4
4.00	mir-4449	Homo sapiens	0	0	0	0	0	1	0	1	3	3	4
4.00	mir-4452	Homo sapiens	0	0	0	0	0	0	0	0	0	4	4
4.00	mir-4485	Homo sapiens	0	0	0	0	0	1	0	1	0	3	4
4.00	mir-3529	Homo sapiens	0	0	0	0	0	0	0	0	4	4	4
4.00	mir-5689	Homo sapiens	0	0	0	0	0	0	0	0	0	4	4
4.00	mir-6866	Homo sapiens	2	4	2	4	0	0	0	0	0	0	4
3.00	mir-106a	Homo sapiens	0	1	0	0	0	0	0	0	2	2	3
3.00	mir-194-2	Homo sapiens	1	3	0	0	0	0	0	0	0	0	3
3.00	mir-324	Homo sapiens	0	2	0	2	0	1	0	1	0	0	3
3.00	mir-500a	Homo sapiens	0	0	0	0	0	3	0	3	0	0	3
3.00	mir-455	Homo sapiens	1	3	1	3	0	0	0	0	0	0	3
3.00	mir-589	Homo sapiens	0	3	0	3	0	0	0	0	0	0	3
3.00	mir-659	Homo sapiens	3	3	3	3	0	0	0	0	0	0	3
3.00	mir-450b	Homo sapiens	0	2	0	2	0	0	0	0	1	1	3
3.00	mir-1287	Homo sapiens	0	3	0	3	0	0	0	0	0	0	3
3.00	mir-1291	Homo sapiens	0	3	0	3	0	0	0	0	0	0	3
3.00	mir-1248	Homo sapiens	0	0	0	0	0	0	0	0	3	3	3
3.00	mir-3135a	Homo sapiens	0	0	0	0	0	0	0	0	0	3	3
3.00	mir-3158-1	Homo sapiens	0	3	0	0	0	0	0	0	0	0	3
3.00	mir-3158-2	Homo sapiens	0	3	0	0	0	0	0	0	0	0	3
3.00	mir-3913-2	Homo sapiens	0	3	0	0	0	0	0	0	0	0	3
3.00	mir-642b	Homo sapiens	1	3	1	3	0	0	0	0	0	0	3
3.00	mir-1268b	Homo sapiens	0	0	0	0	0	0	0	0	0	3	3
3.00	mir-5708	Homo sapiens	0	0	0	0	0	0	0	0	0	3	3
3.00	mir-6786	Homo sapiens	0	0	0	0	0	0	0	0	3	3	3
2.00	mir-103a-2	Homo sapiens	0	0	0	0	0	0	0	0	1	2	2
2.00	mir-203a	Homo sapiens	0	0	0	0	0	2	0	2	0	0	2
2.00	mir-210	Homo sapiens	0	0	0	0	0	1	0	1	0	1	2
2.00	mir-194-1	Homo sapiens	0	2	0	0	0	0	0	0	0	0	2
2.00	mir-331	Homo sapiens	0	2	0	2	0	0	0	0	0	0	2
2.00	mir-504	Homo sapiens	1	2	1	2	0	0	0	0	0	0	2
2.00	mir-576	Homo sapiens	0	0	0	0	0	2	0	2	0	0	2
2.00	mir-618	Homo sapiens	2	2	2	2	0	0	0	0	0	0	2
2.00	mir-660	Homo sapiens	0	2	0	2	0	0	0	0	0	0	2
2.00	mir-1468	Homo sapiens	0	2	0	2	0	0	0	0	0	0	2
2.00	mir-940	Homo sapiens	0	0	0	0	2	2	2	2	0	0	2
2.00	mir-944	Homo sapiens	0	0	0	0	0	2	0	2	0	0	2
2.00	mir-1237	Homo sapiens	0	0	0	0	0	2	0	2	0	0	2
2.00	mir-548o	Homo sapiens	0	0	0	0	1	2	0	0	0	0	2
2.00	mir-548i-2	Homo sapiens	0	1	0	0	0	0	0	0	1	1	2
2.00	mir-548i-4	Homo sapiens	0	2	0	0	0	0	0	0	0	0	2
2.00	mir-1306	Homo sapiens	0	0	0	0	0	0	0	0	2	2	2
2.00	mir-1909	Homo sapiens	0	2	0	2	0	0	0	0	0	0	2
2.00	mir-2278	Homo sapiens	0	2	0	2	0	0	0	0	0	0	2
2.00	mir-3125	Homo sapiens	0	0	0	0	0	0	0	0	0	2	2
2.00	mir-3164	Homo sapiens	0	0	0	0	0	0	0	0	0	2	2
2.00	mir-1260b	Homo sapiens	0	2	0	2	0	0	0	0	0	0	2
2.00	mir-548w	Homo sapiens	0	2	0	2	0	0	0	0	0	0	2
2.00	mir-3194	Homo sapiens	0	0	0	0	1	2	1	2	0	0	2
2.00	mir-3908	Homo sapiens	0	0	0	0	0	0	0	0	0	2	2
2.00	mir-4489	Homo sapiens	0	2	0	2	0	0	0	0	0	0	2
2.00	mir-4662a	Homo sapiens	1	2	1	2	0	0	0	0	0	0	2
2.00	mir-4705	Homo sapiens	1	2	1	2	0	0	0	0	0	0	2
2.00	mir-4728	Homo sapiens	0	0	0	0	0	0	0	0	2	2	2
2.00	mir-5680	Homo sapiens	0	0	0	0	0	2	0	2	0	0	2
2.00	mir-5787	Homo sapiens	0	2	0	2	0	0	0	0	0	0	2
2.00	mir-6747	Homo sapiens	0	0	0	0	0	2	0	2	0	0	2
2.00	mir-7110	Homo sapiens	0	0	0	0	0	0	0	0	0	2	2
2.00	mir-6511b-2	Homo sapiens	0	0	0	0	0	2	0	0	0	0	2
2.00	mir-8054	Homo sapiens	0	0	0	0	0	0	0	0	0	2	2
1.00	mir-33a	Homo sapiens	0	1	0	1	0	0	0	0	0	0	1
1.00	mir-107	Homo sapiens	0	0	0	0	0	0	0	0	1	1	1
1.00	mir-34a	Homo sapiens	0	0	0	0	0	0	0	0	1	1	1
1.00	mir-204	Homo sapiens	0	1	0	1	0	0	0	0	0	0	1
1.00	mir-212	Homo sapiens	0	0	0	0	0	0	0	0	1	1	1
1.00	mir-215	Homo sapiens	0	1	0	0	0	0	0	0	0	0	1
1.00	mir-130a	Homo sapiens	0	0	0	0	0	1	0	1	0	0	1
1.00	mir-145	Homo sapiens	0	0	0	0	0	1	0	1	0	0	1
1.00	mir-149	Homo sapiens	0	0	0	0	0	0	0	0	1	1	1
1.00	mir-1-1	Homo sapiens	0	0	0	0	0	1	0	0	0	0	1
1.00	mir-130b	Homo sapiens	0	0	0	0	0	1	0	1	0	0	1
1.00	mir-382	Homo sapiens	1	1	1	1	0	0	0	0	0	0	1
1.00	mir-422a	Homo sapiens	0	1	0	1	0	0	0	0	0	0	1
1.00	mir-20b	Homo sapiens	0	0	0	0	0	0	0	0	1	1	1
1.00	mir-492	Homo sapiens	0	0	0	0	0	0	0	0	1	1	1
1.00	mir-508	Homo sapiens	0	0	0	0	0	1	0	1	0	0	1
1.00	mir-514a-1	Homo sapiens	0	0	0	0	1	1	0	0	0	0	1
1.00	mir-514a-2	Homo sapiens	0	0	0	0	1	1	0	0	0	0	1
1.00	mir-514a-3	Homo sapiens	0	0	0	0	1	1	0	0	0	0	1
1.00	mir-552	Homo sapiens	0	0	0	0	1	1	1	1	0	0	1
1.00	mir-556	Homo sapiens	0	1	0	1	0	0	0	0	0	0	1
1.00	mir-584	Homo sapiens	0	0	0	0	0	0	0	0	1	1	1
1.00	mir-607	Homo sapiens	0	0	0	0	0	0	0	0	0	1	1
1.00	mir-642a	Homo sapiens	1	1	1	1	0	0	0	0	0	0	1
1.00	mir-651	Homo sapiens	1	1	1	1	0	0	0	0	0	0	1
1.00	mir-421	Homo sapiens	0	0	0	0	0	1	0	1	0	0	1
1.00	mir-454	Homo sapiens	0	0	0	0	1	1	1	1	0	0	1
1.00	mir-766	Homo sapiens	0	0	0	0	1	1	1	1	0	0	1
1.00	mir-934	Homo sapiens	0	1	0	1	0	0	0	0	0	0	1
1.00	mir-942	Homo sapiens	0	1	0	1	0	0	0	0	0	0	1
1.00	mir-1181	Homo sapiens	0	0	0	0	0	0	0	0	0	1	1
1.00	mir-548f-2	Homo sapiens	0	0	0	0	0	0	0	0	0	1	1
1.00	mir-1277	Homo sapiens	0	0	0	0	0	0	0	0	1	1	1
1.00	mir-548i-1	Homo sapiens	0	0	0	0	0	0	0	0	0	1	1
1.00	mir-548i-3	Homo sapiens	0	1	0	0	0	0	0	0	0	0	1
1.00	mir-1292	Homo sapiens	0	0	0	0	0	0	0	0	1	1	1
1.00	mir-664a	Homo sapiens	0	0	0	0	1	1	1	1	0	0	1
1.00	mir-513b	Homo sapiens	0	1	0	1	0	0	0	0	0	0	1
1.00	mir-320d-1	Homo sapiens	0	0	0	0	1	1	0	0	0	0	1
1.00	mir-1908	Homo sapiens	0	1	0	1	0	0	0	0	0	0	1
1.00	mir-1976	Homo sapiens	0	0	0	0	0	1	0	1	0	0	1
1.00	mir-2116	Homo sapiens	0	0	0	0	0	1	0	1	0	0	1
1.00	mir-2277	Homo sapiens	0	1	0	1	0	0	0	0	0	0	1
1.00	mir-3065	Homo sapiens	0	0	0	0	1	1	1	1	0	0	1
1.00	mir-500b	Homo sapiens	0	0	0	0	0	1	0	1	0	0	1
1.00	mir-3620	Homo sapiens	0	0	0	0	0	0	0	0	0	1	1
1.00	mir-3690-1	Homo sapiens	0	0	0	0	0	0	0	0	0	1	1
1.00	mir-3180-5	Homo sapiens	1	1	0	0	0	0	0	0	0	0	1
1.00	mir-3909	Homo sapiens	0	0	0	0	1	1	1	1	0	0	1
1.00	mir-3913-1	Homo sapiens	0	1	0	0	0	0	0	0	0	0	1
1.00	mir-3150b	Homo sapiens	0	0	0	0	0	1	0	1	0	0	1
1.00	mir-3924	Homo sapiens	0	0	0	0	0	0	0	0	0	1	1
1.00	mir-374c	Homo sapiens	0	0	0	0	0	0	0	0	1	1	1
1.00	mir-548o-2	Homo sapiens	0	0	0	0	1	1	0	0	0	0	1
1.00	mir-4423	Homo sapiens	0	1	0	1	0	0	0	0	0	0	1
1.00	mir-4504	Homo sapiens	0	0	0	0	1	1	1	1	0	0	1
1.00	mir-4508	Homo sapiens	0	0	0	0	0	0	0	0	0	1	1
1.00	mir-4512	Homo sapiens	0	0	0	0	0	1	0	1	0	0	1
1.00	mir-4634	Homo sapiens	0	1	0	1	0	0	0	0	0	0	1
1.00	mir-4639	Homo sapiens	0	1	0	1	0	0	0	0	0	0	1
1.00	mir-4667	Homo sapiens	0	0	0	0	0	0	0	0	1	1	1
1.00	mir-4742	Homo sapiens	0	0	0	0	0	1	0	1	0	0	1
1.00	mir-4776-1	Homo sapiens	0	0	0	0	0	0	0	0	1	1	1
1.00	mir-4436b-1	Homo sapiens	0	0	0	0	0	1	0	0	0	0	1
1.00	mir-4802	Homo sapiens	0	0	0	0	0	0	0	0	1	1	1
1.00	mir-5089	Homo sapiens	0	0	0	0	0	1	0	1	0	0	1
1.00	mir-5571	Homo sapiens	0	0	0	0	0	0	0	0	1	1	1
1.00	mir-548ay	Homo sapiens	1	1	1	1	0	0	0	0	0	0	1
1.00	mir-6500	Homo sapiens	0	0	0	0	0	1	0	1	0	0	1
1.00	mir-6715b	Homo sapiens	0	0	0	0	1	1	1	1	0	0	1
1.00	mir-6511b-1	Homo sapiens	0	0	0	0	0	1	0	0	0	0	1
1.00	mir-6811	Homo sapiens	0	0	0	0	0	0	0	0	1	1	1
1.00	mir-6814	Homo sapiens	0	0	0	0	0	0	0	0	1	1	1
1.00	mir-6827	Homo sapiens	0	0	0	0	0	1	0	1	0	0	1
1.00	mir-6861	Homo sapiens	0	1	0	1	0	0	0	0	0	0	1
1.00	mir-6877	Homo sapiens	0	1	0	1	0	0	0	0	0	0	1
1.00	mir-3690-2	Homo sapiens	0	0	0	0	0	0	0	0	0	1	1
1.00	mir-6511a-3	Homo sapiens	0	0	0	0	0	1	0	0	0	0	1
1.00	mir-6511a-4	Homo sapiens	0	0	0	0	0	1	0	0	0	0	1
1.00	mir-7151	Homo sapiens	0	1	0	1	0	0	0	0	0	0	1
1.00	mir-7856	Homo sapiens	0	0	0	0	0	0	0	0	0	1	1
1.00	mir-9901	Homo sapiens	1	1	1	1	0	0	0	0	0	0	1
1.00	mir-9902-1	Homo sapiens	0	0	0	0	0	0	0	0	0	1	1
1.00	mir-9985	Homo sapiens	0	1	0	1	0	0	0	0	0	0	1
1.00	mir-10392	Homo sapiens	0	1	0	1	0	0	0	0	0	0	1
1.00	mir-10527	Homo sapiens	0	1	0	1	0	0	0	0	0	0	1
1.00	mir-12136	Homo sapiens	0	0	0	0	0	0	0	0	1	1	1
1.00	mir-9902-2	Homo sapiens	0	0	0	0	0	0	0	0	0	1	1
0.00	mir-103a-1	Homo sapiens	0	0	0	0	0	0	0	0	0	0	0
0.00	mir-1-2	Homo sapiens	0	0	0	0	0	0	0	0	0	0	0
0.00	mir-378d-2	Homo sapiens	0	0	0	0	0	0	0	0	0	0	0
0.00	mir-548f-3	Homo sapiens	0	0	0	0	0	0	0	0	0	0	0
0.00	mir-320d-2	Homo sapiens	0	0	0	0	0	0	0	0	0	0	0
0.00	mir-1972-1	Homo sapiens	0	0	0	0	0	0	0	0	0	0	0
0.00	mir-1972-2	Homo sapiens	0	0	0	0	0	0	0	0	0	0	0
0.00	mir-3180-4	Homo sapiens	0	0	0	0	0	0	0	0	0	0	0
0.00	mir-378g	Homo sapiens	0	0	0	0	0	0	0	0	0	0	0
0.00	mir-4510	Homo sapiens	0	0	0	0	0	0	0	0	0	0	0
0.00	mir-4776-2	Homo sapiens	0	0	0	0	0	0	0	0	0	0	0
0.00	mir-4436b-2	Homo sapiens	0	0	0	0	0	0	0	0	0	0	0
0.00	mir-6511a-1	Homo sapiens	0	0	0	0	0	0	0	0	0	0	0
0.00	mir-6511a-2	Homo sapiens	0	0	0	0	0	0	0	0	0	0	0

## Sheet: 6A
Expression values	Name	Resource	Exact mature 5'	Mature 5'	Unique exact mature 5'	Unique mature 5'	Exact mature 3'	Mature 3'	Unique exact mature 3'	Unique mature 3'	Exact other	Other	Total
23,843.00	mir-148a	Homo sapiens	3	10	3	10	21574	23810	21574	23776	19	23	23843
6,833.00	mir-21	Homo sapiens	2759	6756	2759	6756	0	3	0	3	69	74	6833
2,806.00	mir-200b	Homo sapiens	14	56	14	56	852	2731	852	2725	5	19	2806
2,443.00	mir-99a	Homo sapiens	13	2443	13	2440	0	0	0	0	0	0	2443
2,292.00	mir-27b	Homo sapiens	0	0	0	0	206	2291	206	2280	0	1	2292
2,115.00	mir-200a	Homo sapiens	71	135	71	135	2	1969	2	1964	10	11	2115
2,077.00	mir-34c	Homo sapiens	451	1973	451	1973	5	12	5	12	89	92	2077
1,595.00	mir-375	Homo sapiens	0	0	0	0	530	1526	530	1526	63	69	1595
1,519.00	mir-27a	Homo sapiens	1	1	1	1	7	1518	7	1508	0	0	1519
1,347.00	mir-151a	Homo sapiens	1	1	1	1	921	1332	921	1332	5	14	1347
1,295.00	mir-200c	Homo sapiens	0	0	0	0	323	1252	323	1246	41	43	1295
1,125.00	mir-3074	Homo sapiens	0	1109	0	1109	0	16	0	16	0	0	1125
1,008.00	mir-30d	Homo sapiens	147	979	147	979	0	1	0	1	25	28	1008
737.00	mir-3960	Homo sapiens	0	0	0	0	0	28	0	28	0	709	737
675.00	mir-1246	Homo sapiens	75	675	75	675	0	0	0	0	0	0	675
604.00	mir-22	Homo sapiens	1	66	1	66	264	489	264	489	43	49	604
561.00	let-7b	Homo sapiens	179	482	179	481	0	3	0	3	71	76	561
560.00	let-7i	Homo sapiens	345	540	345	536	0	0	0	0	18	20	560
559.00	let-7g	Homo sapiens	109	550	109	547	0	0	0	0	9	9	559
533.00	mir-203b	Homo sapiens	0	532	0	532	0	0	0	0	0	1	533
525.00	mir-429	Homo sapiens	0	0	0	0	267	522	267	522	3	3	525
435.00	mir-205	Homo sapiens	66	434	66	434	0	0	0	0	0	1	435
419.00	let-7f-2	Homo sapiens	86	408	0	9	0	0	0	0	10	11	419
413.00	let-7f-1	Homo sapiens	87	404	0	2	0	0	0	0	8	9	413
321.00	mir-10400	Homo sapiens	0	321	0	321	0	0	0	0	0	0	321
320.00	mir-30a	Homo sapiens	51	230	51	229	22	61	22	61	26	29	320
308.00	let-7a-3	Homo sapiens	45	295	0	0	0	1	0	0	8	12	308
306.00	let-7a-1	Homo sapiens	44	291	0	0	0	3	0	0	8	12	306
306.00	mir-378a	Homo sapiens	0	0	0	0	5	306	5	306	0	0	306
301.00	mir-8072	Homo sapiens	0	0	0	0	0	0	0	0	0	301	301
297.00	let-7a-2	Homo sapiens	44	289	0	0	0	0	0	0	7	8	297
280.00	mir-26a-2	Homo sapiens	197	276	0	0	0	0	0	0	4	4	280
268.00	mir-26a-1	Homo sapiens	197	263	0	0	0	0	0	0	5	5	268
250.00	mir-92b	Homo sapiens	0	3	0	3	44	220	44	215	16	27	250
224.00	mir-183	Homo sapiens	113	224	113	224	0	0	0	0	0	0	224
223.00	mir-125a	Homo sapiens	5	208	5	208	0	1	0	1	13	14	223
201.00	mir-152	Homo sapiens	0	0	0	0	52	198	52	198	0	3	201
182.00	mir-29a	Homo sapiens	0	0	0	0	16	166	16	166	14	16	182
174.00	let-7c	Homo sapiens	111	160	111	160	3	4	3	4	9	10	174
171.00	mir-146a	Homo sapiens	89	170	89	168	0	0	0	0	0	1	171
168.00	mir-423	Homo sapiens	22	55	22	55	46	90	46	90	22	23	168
144.00	mir-182	Homo sapiens	13	106	13	106	0	0	0	0	37	38	144
140.00	mir-320a	Homo sapiens	0	0	0	0	67	139	67	132	0	1	140
133.00	mir-25	Homo sapiens	0	0	0	0	87	133	87	133	0	0	133
130.00	mir-99b	Homo sapiens	13	119	13	119	4	9	4	9	2	2	130
129.00	mir-141	Homo sapiens	0	1	0	1	0	112	0	107	15	16	129
128.00	mir-148b	Homo sapiens	0	0	0	0	51	128	51	94	0	0	128
121.00	mir-26b	Homo sapiens	54	119	54	119	0	0	0	0	0	2	121
114.00	mir-101-1	Homo sapiens	0	1	0	1	20	113	0	0	0	0	114
113.00	mir-222	Homo sapiens	0	0	0	0	47	107	47	107	3	6	113
112.00	mir-101-2	Homo sapiens	0	0	0	0	21	111	0	4	1	1	112
98.00	mir-100	Homo sapiens	1	98	1	94	0	0	0	0	0	0	98
97.00	mir-128-1	Homo sapiens	0	0	0	0	30	97	0	35	0	0	97
96.00	mir-30e	Homo sapiens	8	60	8	59	9	21	9	21	10	15	96
87.00	mir-532	Homo sapiens	66	87	66	87	0	0	0	0	0	0	87
84.00	mir-181a-1	Homo sapiens	3	63	0	0	1	2	1	2	19	19	84
83.00	mir-224	Homo sapiens	0	68	0	68	0	0	0	0	15	15	83
79.00	mir-181a-2	Homo sapiens	3	61	0	0	0	1	0	1	17	17	79
77.00	mir-221	Homo sapiens	0	8	0	8	9	64	9	64	4	5	77
77.00	mir-191	Homo sapiens	16	69	16	69	0	1	0	1	7	7	77
75.00	mir-449a	Homo sapiens	27	67	27	66	0	0	0	0	2	8	75
68.00	mir-146b	Homo sapiens	34	68	34	66	0	0	0	0	0	0	68
68.00	mir-744	Homo sapiens	11	66	11	66	0	0	0	0	0	2	68
63.00	mir-186	Homo sapiens	21	63	21	63	0	0	0	0	0	0	63
56.00	mir-92a-1	Homo sapiens	0	0	0	0	33	56	0	8	0	0	56
55.00	mir-28	Homo sapiens	3	21	3	21	9	31	9	31	2	3	55
55.00	mir-192	Homo sapiens	9	45	9	45	0	0	0	0	7	10	55
54.00	mir-128-2	Homo sapiens	0	0	0	0	31	54	0	0	0	0	54
53.00	mir-125b-2	Homo sapiens	17	44	0	0	0	1	0	1	6	8	53
53.00	mir-340	Homo sapiens	22	50	22	50	0	2	0	2	1	1	53
51.00	mir-92a-2	Homo sapiens	0	0	0	0	33	51	0	0	0	0	51
50.00	mir-34b	Homo sapiens	0	2	0	2	1	48	1	48	0	0	50
49.00	mir-140	Homo sapiens	5	9	5	9	3	28	3	28	7	12	49
47.00	mir-125b-1	Homo sapiens	17	42	0	0	0	0	0	0	5	5	47
47.00	mir-361	Homo sapiens	3	10	3	10	3	37	3	37	0	0	47
47.00	mir-2110	Homo sapiens	3	33	3	33	0	0	0	0	6	14	47
46.00	mir-24-2	Homo sapiens	0	5	0	5	0	36	0	0	5	5	46
46.00	mir-1180	Homo sapiens	0	0	0	0	29	44	29	44	2	2	46
44.00	let-7d	Homo sapiens	0	42	0	39	0	2	0	2	0	0	44
43.00	mir-1290	Homo sapiens	0	0	0	0	0	43	0	43	0	0	43
40.00	mir-3159	Homo sapiens	0	0	0	0	0	0	0	0	8	40	40
36.00	mir-24-1	Homo sapiens	0	3	0	3	0	33	0	0	0	0	36
36.00	mir-98	Homo sapiens	11	33	11	32	0	0	0	0	3	3	36
32.00	mir-23b	Homo sapiens	2	9	2	9	0	12	0	11	8	11	32
30.00	mir-143	Homo sapiens	0	0	0	0	24	30	24	30	0	0	30
30.00	mir-1285-1	Homo sapiens	0	2	0	2	0	0	0	0	4	28	30
29.00	mir-142	Homo sapiens	2	8	2	8	3	4	3	4	17	17	29
29.00	mir-3184	Homo sapiens	0	4	0	4	0	0	0	0	23	25	29
26.00	mir-190b	Homo sapiens	17	26	17	26	0	0	0	0	0	0	26
25.00	mir-23a	Homo sapiens	1	1	1	1	0	24	0	24	0	0	25
25.00	mir-103b-1	Homo sapiens	15	24	0	0	0	0	0	0	1	1	25
24.00	mir-95	Homo sapiens	0	0	0	0	3	24	3	24	0	0	24
23.00	mir-106b	Homo sapiens	0	0	0	0	1	20	1	20	3	3	23
22.00	mir-16-2	Homo sapiens	3	14	0	0	3	8	3	8	0	0	22
22.00	mir-103b-2	Homo sapiens	15	22	0	0	0	0	0	0	0	0	22
21.00	mir-8086	Homo sapiens	0	0	0	0	0	0	0	0	1	21	21
20.00	mir-223	Homo sapiens	1	2	1	2	3	15	3	15	3	3	20
20.00	mir-619	Homo sapiens	1	7	1	7	0	0	0	0	2	13	20
20.00	mir-628	Homo sapiens	6	9	6	9	1	6	1	6	5	5	20
20.00	mir-708	Homo sapiens	3	8	3	8	0	11	0	11	1	1	20
19.00	mir-126	Homo sapiens	0	0	0	0	12	19	12	19	0	0	19
19.00	mir-452	Homo sapiens	5	6	5	6	0	0	0	0	13	13	19
18.00	mir-9-1	Homo sapiens	2	13	0	0	0	2	0	0	3	3	18
18.00	mir-9-2	Homo sapiens	2	13	0	0	0	2	0	0	3	3	18
18.00	mir-449c	Homo sapiens	0	17	0	17	0	0	0	0	1	1	18
17.00	mir-20a	Homo sapiens	15	17	15	17	0	0	0	0	0	0	17
17.00	mir-96	Homo sapiens	13	17	13	17	0	0	0	0	0	0	17
17.00	mir-9-3	Homo sapiens	2	11	0	0	0	2	0	0	4	4	17
17.00	mir-6510	Homo sapiens	0	0	0	0	7	17	7	17	0	0	17
16.00	mir-132	Homo sapiens	2	7	2	7	0	7	0	7	2	2	16
16.00	mir-184	Homo sapiens	0	0	0	0	5	9	5	9	7	7	16
16.00	mir-1307	Homo sapiens	0	1	0	1	0	15	0	15	0	0	16
15.00	mir-32	Homo sapiens	6	15	6	15	0	0	0	0	0	0	15
15.00	mir-135b	Homo sapiens	13	14	13	14	0	1	0	1	0	0	15
15.00	mir-3615	Homo sapiens	0	0	0	0	0	15	0	15	0	0	15
14.00	mir-16-1	Homo sapiens	3	14	0	0	0	0	0	0	0	0	14
14.00	mir-185	Homo sapiens	2	14	2	14	0	0	0	0	0	0	14
14.00	mir-181b-2	Homo sapiens	3	8	0	0	0	0	0	0	5	6	14
13.00	mir-31	Homo sapiens	0	13	0	13	0	0	0	0	0	0	13
13.00	mir-769	Homo sapiens	3	13	3	13	0	0	0	0	0	0	13
12.00	mir-218-1	Homo sapiens	7	12	0	0	0	0	0	0	0	0	12
12.00	mir-30c-1	Homo sapiens	4	11	0	0	0	0	0	0	1	1	12
12.00	mir-339	Homo sapiens	0	0	0	0	0	12	0	12	0	0	12
12.00	mir-345	Homo sapiens	2	12	2	12	0	0	0	0	0	0	12
12.00	mir-7851	Homo sapiens	0	0	0	0	0	0	0	0	0	12	12
11.00	mir-181b-1	Homo sapiens	3	5	0	0	0	0	0	0	6	6	11
11.00	mir-218-2	Homo sapiens	8	11	0	0	0	0	0	0	0	0	11
11.00	mir-149	Homo sapiens	3	10	3	10	0	0	0	0	1	1	11
11.00	mir-29c	Homo sapiens	0	0	0	0	0	5	0	5	6	6	11
11.00	mir-3929	Homo sapiens	0	0	0	0	0	0	0	0	0	11	11
11.00	mir-4430	Homo sapiens	0	0	0	0	0	0	0	0	0	11	11
11.00	mir-378i	Homo sapiens	0	11	0	11	0	0	0	0	0	0	11
11.00	mir-1843	Homo sapiens	0	6	0	6	0	0	0	0	0	5	11
10.00	let-7e	Homo sapiens	1	10	1	9	0	0	0	0	0	0	10
10.00	mir-582	Homo sapiens	0	0	0	0	8	10	8	10	0	0	10
10.00	mir-1287	Homo sapiens	4	10	4	10	0	0	0	0	0	0	10
10.00	mir-4485	Homo sapiens	0	0	0	0	0	2	0	2	4	8	10
9.00	mir-30c-2	Homo sapiens	3	8	0	0	0	0	0	0	1	1	9
9.00	mir-204	Homo sapiens	1	9	1	9	0	0	0	0	0	0	9
9.00	mir-374a	Homo sapiens	1	9	1	9	0	0	0	0	0	0	9
9.00	mir-328	Homo sapiens	0	0	0	0	5	9	5	9	0	0	9
9.00	mir-320b-2	Homo sapiens	0	0	0	0	0	9	0	0	0	0	9
9.00	mir-12136	Homo sapiens	0	3	0	3	0	0	0	0	3	6	9
8.00	mir-3665	Homo sapiens	0	0	0	0	0	0	0	0	0	8	8
7.00	mir-19a	Homo sapiens	0	0	0	0	0	7	0	7	0	0	7
7.00	mir-7-1	Homo sapiens	2	5	0	0	0	2	0	2	0	0	7
7.00	mir-342	Homo sapiens	2	3	2	3	0	4	0	4	0	0	7
7.00	mir-1273h	Homo sapiens	2	2	2	2	0	0	0	0	0	5	7
7.00	mir-10395	Homo sapiens	0	0	0	0	3	7	3	7	0	0	7
6.00	mir-210	Homo sapiens	0	0	0	0	4	6	4	6	0	0	6
6.00	mir-195	Homo sapiens	1	5	1	5	0	1	0	1	0	0	6
6.00	mir-425	Homo sapiens	1	4	1	4	0	2	0	2	0	0	6
6.00	mir-501	Homo sapiens	0	0	0	0	0	4	0	4	0	2	6
6.00	mir-449b	Homo sapiens	0	4	0	3	0	2	0	2	0	0	6
6.00	mir-421	Homo sapiens	0	0	0	0	0	6	0	6	0	0	6
6.00	mir-320b-1	Homo sapiens	0	0	0	0	0	6	0	0	0	0	6
6.00	mir-3613	Homo sapiens	0	3	0	3	0	0	0	0	3	3	6
6.00	mir-10396b	Homo sapiens	0	3	0	3	0	0	0	0	3	3	6
5.00	mir-10a	Homo sapiens	0	5	0	5	0	0	0	0	0	0	5
5.00	mir-499a	Homo sapiens	3	5	3	5	0	0	0	0	0	0	5
5.00	mir-625	Homo sapiens	0	5	0	5	0	0	0	0	0	0	5
4.00	mir-15b	Homo sapiens	0	0	0	0	0	4	0	4	0	0	4
4.00	mir-194-1	Homo sapiens	0	4	0	0	0	0	0	0	0	0	4
4.00	mir-335	Homo sapiens	0	1	0	1	3	3	3	3	0	0	4
4.00	mir-484	Homo sapiens	2	4	2	4	0	0	0	0	0	0	4
4.00	mir-589	Homo sapiens	0	4	0	4	0	0	0	0	0	0	4
4.00	mir-629	Homo sapiens	1	4	1	4	0	0	0	0	0	0	4
4.00	mir-1301	Homo sapiens	0	0	0	0	0	1	0	1	3	3	4
4.00	mir-378d-2	Homo sapiens	0	3	0	3	0	0	0	0	0	1	4
4.00	mir-509-3	Homo sapiens	2	4	2	4	0	0	0	0	0	0	4
4.00	mir-941-4	Homo sapiens	0	0	0	0	2	4	0	0	0	0	4
4.00	mir-1268a	Homo sapiens	0	0	0	0	0	0	0	0	0	4	4
4.00	mir-4472-2	Homo sapiens	0	0	0	0	0	0	0	0	0	4	4
4.00	mir-5588	Homo sapiens	0	0	0	0	0	1	0	1	1	3	4
3.00	mir-19b-1	Homo sapiens	0	0	0	0	1	3	0	0	0	0	3
3.00	mir-29b-2	Homo sapiens	0	0	0	0	0	2	0	0	1	1	3
3.00	mir-107	Homo sapiens	0	0	0	0	2	2	2	2	1	1	3
3.00	mir-7-2	Homo sapiens	2	3	0	0	0	0	0	0	0	0	3
3.00	mir-7-3	Homo sapiens	1	3	0	0	0	0	0	0	0	0	3
3.00	mir-215	Homo sapiens	0	3	0	1	0	0	0	0	0	0	3
3.00	mir-194-2	Homo sapiens	0	3	0	0	0	0	0	0	0	0	3
3.00	mir-130b	Homo sapiens	0	0	0	0	0	3	0	3	0	0	3
3.00	mir-363	Homo sapiens	0	0	0	0	2	3	2	3	0	0	3
3.00	mir-331	Homo sapiens	0	3	0	3	0	0	0	0	0	0	3
3.00	mir-451a	Homo sapiens	0	3	0	3	0	0	0	0	0	0	3
3.00	mir-181d	Homo sapiens	1	1	1	1	0	0	0	0	2	2	3
3.00	mir-514a-1	Homo sapiens	0	0	0	0	2	3	0	0	0	0	3
3.00	mir-455	Homo sapiens	0	2	0	2	0	0	0	0	0	1	3
3.00	mir-574	Homo sapiens	0	0	0	0	3	3	3	3	0	0	3
3.00	mir-671	Homo sapiens	0	2	0	2	1	1	1	1	0	0	3
3.00	mir-941-3	Homo sapiens	0	0	0	0	1	3	0	0	0	0	3
3.00	mir-1299	Homo sapiens	0	0	0	0	0	2	0	2	1	1	3
3.00	mir-1260b	Homo sapiens	0	3	0	3	0	0	0	0	0	0	3
3.00	mir-3648-1	Homo sapiens	0	0	0	0	0	0	0	0	1	3	3
3.00	mir-4677	Homo sapiens	0	1	0	1	0	2	0	2	0	0	3
3.00	mir-548az	Homo sapiens	0	3	0	3	0	0	0	0	0	0	3
3.00	mir-7704	Homo sapiens	0	3	0	3	0	0	0	0	0	0	3
3.00	mir-10396a	Homo sapiens	0	0	0	0	0	0	0	0	3	3	3
2.00	mir-19b-2	Homo sapiens	0	0	0	0	1	2	0	0	0	0	2
2.00	mir-29b-1	Homo sapiens	0	0	0	0	0	1	0	0	1	1	2
2.00	mir-10b	Homo sapiens	0	2	0	2	0	0	0	0	0	0	2
2.00	mir-181c	Homo sapiens	0	0	0	0	0	2	0	2	0	0	2
2.00	mir-30b	Homo sapiens	0	2	0	2	0	0	0	0	0	0	2
2.00	mir-193a	Homo sapiens	2	2	2	2	0	0	0	0	0	0	2
2.00	mir-330	Homo sapiens	0	1	0	1	0	1	0	1	0	0	2
2.00	mir-324	Homo sapiens	0	0	0	0	0	0	0	0	0	2	2
2.00	mir-338	Homo sapiens	0	2	0	2	0	0	0	0	0	0	2
2.00	mir-422a	Homo sapiens	0	2	0	2	0	0	0	0	0	0	2
2.00	mir-486-1	Homo sapiens	1	2	0	0	0	0	0	0	0	0	2
2.00	mir-193b	Homo sapiens	0	0	0	0	0	2	0	2	0	0	2
2.00	mir-576	Homo sapiens	0	0	0	0	0	2	0	2	0	0	2
2.00	mir-598	Homo sapiens	0	0	0	0	0	0	0	0	2	2	2
2.00	mir-652	Homo sapiens	0	0	0	0	0	2	0	2	0	0	2
2.00	mir-660	Homo sapiens	1	2	1	2	0	0	0	0	0	0	2
2.00	mir-874	Homo sapiens	0	0	0	0	1	2	1	2	0	0	2
2.00	mir-374b	Homo sapiens	0	2	0	2	0	0	0	0	0	0	2
2.00	mir-941-1	Homo sapiens	0	0	0	0	1	2	0	0	0	0	2
2.00	mir-1295a	Homo sapiens	0	0	0	0	2	2	2	2	0	0	2
2.00	mir-548o	Homo sapiens	0	0	0	0	2	2	0	0	0	0	2
2.00	mir-1284	Homo sapiens	0	2	0	2	0	0	0	0	0	0	2
2.00	mir-3177	Homo sapiens	0	0	0	0	0	2	0	2	0	0	2
2.00	mir-378c	Homo sapiens	0	0	0	0	0	0	0	0	1	2	2
2.00	mir-548o-2	Homo sapiens	0	0	0	0	2	2	0	0	0	0	2
2.00	mir-378f	Homo sapiens	0	0	0	0	0	1	0	1	0	1	2
2.00	mir-6132	Homo sapiens	0	0	0	0	0	0	0	0	0	2	2
2.00	mir-7110	Homo sapiens	0	0	0	0	0	0	0	0	0	2	2
2.00	mir-7706	Homo sapiens	0	0	0	0	0	2	0	2	0	0	2
2.00	mir-3648-2	Homo sapiens	0	0	0	0	0	0	0	0	2	2	2
2.00	mir-941-5	Homo sapiens	0	0	0	0	1	2	0	0	0	0	2
2.00	mir-9985	Homo sapiens	0	2	0	2	0	0	0	0	0	0	2
2.00	mir-10527	Homo sapiens	1	2	1	2	0	0	0	0	0	0	2
1.00	mir-15a	Homo sapiens	0	1	0	1	0	0	0	0	0	0	1
1.00	mir-103a-2	Homo sapiens	0	0	0	0	0	0	0	0	1	1	1
1.00	mir-197	Homo sapiens	0	0	0	0	1	1	1	1	0	0	1
1.00	mir-199a-2	Homo sapiens	0	0	0	0	0	1	0	0	0	0	1
1.00	mir-199b	Homo sapiens	0	0	0	0	0	1	0	0	0	0	1
1.00	mir-219a-1	Homo sapiens	0	0	0	0	0	1	0	1	0	0	1
1.00	mir-133a-1	Homo sapiens	0	0	0	0	0	1	0	0	0	0	1
1.00	mir-153-2	Homo sapiens	0	0	0	0	1	1	0	0	0	0	1
1.00	mir-1-1	Homo sapiens	0	0	0	0	0	1	0	0	0	0	1
1.00	mir-155	Homo sapiens	0	0	0	0	0	0	0	0	1	1	1
1.00	mir-424	Homo sapiens	0	0	0	0	1	1	1	1	0	0	1
1.00	mir-511	Homo sapiens	1	1	1	1	0	0	0	0	0	0	1
1.00	mir-516b-1	Homo sapiens	0	1	0	1	0	0	0	0	0	0	1
1.00	mir-502	Homo sapiens	0	0	0	0	1	1	1	1	0	0	1
1.00	mir-514a-2	Homo sapiens	0	0	0	0	1	1	0	0	0	0	1
1.00	mir-514a-3	Homo sapiens	0	0	0	0	1	1	0	0	0	0	1
1.00	mir-556	Homo sapiens	0	1	0	1	0	0	0	0	0	0	1
1.00	mir-579	Homo sapiens	0	0	0	0	0	0	0	0	0	1	1
1.00	mir-590	Homo sapiens	0	0	0	0	0	1	0	1	0	0	1
1.00	mir-651	Homo sapiens	1	1	1	1	0	0	0	0	0	0	1
1.00	mir-760	Homo sapiens	0	0	0	0	0	1	0	1	0	0	1
1.00	mir-941-2	Homo sapiens	0	0	0	0	1	1	0	0	0	0	1
1.00	mir-1183	Homo sapiens	0	0	0	0	0	0	0	0	0	1	1
1.00	mir-1285-2	Homo sapiens	0	0	0	0	0	1	0	0	0	0	1
1.00	mir-1304	Homo sapiens	0	0	0	0	0	0	0	0	1	1	1
1.00	mir-1269a	Homo sapiens	0	0	0	0	0	1	0	1	0	0	1
1.00	mir-1277	Homo sapiens	0	0	0	0	0	0	0	0	1	1	1
1.00	mir-1278	Homo sapiens	0	0	0	0	1	1	1	1	0	0	1
1.00	mir-320c-2	Homo sapiens	0	0	0	0	0	1	0	0	0	0	1
1.00	mir-3135a	Homo sapiens	0	0	0	0	0	0	0	0	0	1	1
1.00	mir-3150a	Homo sapiens	0	1	0	1	0	0	0	0	0	0	1
1.00	mir-3158-1	Homo sapiens	0	1	0	0	0	0	0	0	0	0	1
1.00	mir-3158-2	Homo sapiens	0	1	0	0	0	0	0	0	0	0	1
1.00	mir-3065	Homo sapiens	0	0	0	0	0	1	0	1	0	0	1
1.00	mir-3913-1	Homo sapiens	0	1	0	0	0	0	0	0	0	0	1
1.00	mir-3913-2	Homo sapiens	0	1	0	0	0	0	0	0	0	0	1
1.00	mir-378d-1	Homo sapiens	0	0	0	0	0	1	0	1	0	0	1
1.00	mir-378e	Homo sapiens	0	0	0	0	0	1	0	1	0	0	1
1.00	mir-4418	Homo sapiens	0	0	0	0	0	0	0	0	0	1	1
1.00	mir-378g	Homo sapiens	0	1	0	1	0	0	0	0	0	0	1
1.00	mir-4446	Homo sapiens	0	0	0	0	0	1	0	1	0	0	1
1.00	mir-4449	Homo sapiens	0	0	0	0	0	1	0	1	0	0	1
1.00	mir-4454	Homo sapiens	0	0	0	0	0	0	0	0	0	1	1
1.00	mir-4491	Homo sapiens	0	0	0	0	0	0	0	0	1	1	1
1.00	mir-4524a	Homo sapiens	0	0	0	0	0	0	0	0	0	1	1
1.00	mir-4661	Homo sapiens	0	1	0	1	0	0	0	0	0	0	1
1.00	mir-4662a	Homo sapiens	1	1	1	1	0	0	0	0	0	0	1
1.00	mir-4676	Homo sapiens	0	0	0	0	0	0	0	0	0	1	1
1.00	mir-4687	Homo sapiens	0	0	0	0	0	0	0	0	1	1	1
1.00	mir-3529	Homo sapiens	0	0	0	0	0	0	0	0	1	1	1
1.00	mir-4524b	Homo sapiens	0	0	0	0	0	0	0	0	0	1	1
1.00	mir-664b	Homo sapiens	0	0	0	0	0	0	0	0	0	1	1
1.00	mir-5582	Homo sapiens	0	0	0	0	0	1	0	1	0	0	1
1.00	mir-1295b	Homo sapiens	0	0	0	0	0	1	0	1	0	0	1
1.00	mir-5684	Homo sapiens	0	0	0	0	0	0	0	0	0	1	1
1.00	mir-5688	Homo sapiens	0	0	0	0	0	0	0	0	0	1	1
1.00	mir-6736	Homo sapiens	0	1	0	1	0	0	0	0	0	0	1
1.00	mir-6811	Homo sapiens	0	1	0	1	0	0	0	0	0	0	1
1.00	mir-6842	Homo sapiens	0	1	0	1	0	0	0	0	0	0	1
1.00	mir-6868	Homo sapiens	0	0	0	0	0	1	0	1	0	0	1
1.00	mir-10399	Homo sapiens	0	1	0	1	0	0	0	0	0	0	1
0.00	mir-103a-1	Homo sapiens	0	0	0	0	0	0	0	0	0	0	0
0.00	mir-199a-1	Homo sapiens	0	0	0	0	0	0	0	0	0	0	0
0.00	mir-203a	Homo sapiens	0	0	0	0	0	0	0	0	0	0	0
0.00	mir-1-2	Homo sapiens	0	0	0	0	0	0	0	0	0	0	0
0.00	mir-133a-2	Homo sapiens	0	0	0	0	0	0	0	0	0	0	0
0.00	mir-153-1	Homo sapiens	0	0	0	0	0	0	0	0	0	0	0
0.00	mir-320c-1	Homo sapiens	0	0	0	0	0	0	0	0	0	0	0
0.00	mir-23c	Homo sapiens	0	0	0	0	0	0	0	0	0	0	0
0.00	mir-5689	Homo sapiens	0	0	0	0	0	0	0	0	0	0	0
0.00	mir-486-2	Homo sapiens	0	0	0	0	0	0	0	0	0	0	0

## Sheet: 9A
Expression values	Name	Resource	Exact mature 5'	Mature 5'	Unique exact mature 5'	Unique mature 5'	Exact mature 3'	Mature 3'	Unique exact mature 3'	Unique mature 3'	Exact other	Other	Total
73,343.00	mir-148a	Homo sapiens	23	33	23	33	64589	73203	64589	73112	96	107	73343
37,664.00	mir-21	Homo sapiens	11837	36547	11837	36547	16	26	16	26	976	1091	37664
18,445.00	mir-200a	Homo sapiens	517	987	517	987	9	17369	9	17348	81	89	18445
12,163.00	let-7b	Homo sapiens	4353	10680	4353	10670	0	4	0	4	1395	1479	12163
10,902.00	mir-27a	Homo sapiens	36	73	36	73	45	10827	45	10785	2	2	10902
10,771.00	mir-200b	Homo sapiens	58	234	58	234	929	10485	929	10466	27	52	10771
9,293.00	let-7i	Homo sapiens	7105	8853	7105	8848	1	9	1	9	397	431	9293
8,013.00	mir-99a	Homo sapiens	124	7977	124	7968	0	0	0	0	29	36	8013
6,114.00	mir-27b	Homo sapiens	0	2	0	2	157	6110	157	6067	0	2	6114
5,596.00	mir-200c	Homo sapiens	0	2	0	2	1820	5472	1820	5454	109	122	5596
4,836.00	mir-151a	Homo sapiens	13	20	13	20	2897	4775	2897	4775	29	41	4836
4,418.00	mir-146a	Homo sapiens	1734	4405	1734	4361	0	0	0	0	13	13	4418
4,328.00	mir-3074	Homo sapiens	0	4295	0	4295	0	31	0	31	2	2	4328
3,317.00	mir-30d	Homo sapiens	756	3146	756	3145	0	3	0	3	149	168	3317
3,235.00	mir-146b	Homo sapiens	1828	3195	1828	3153	4	18	4	18	19	22	3235
3,205.00	mir-423	Homo sapiens	783	2101	783	2101	344	841	344	841	231	263	3205
2,873.00	mir-26a-2	Homo sapiens	2223	2852	0	0	0	3	0	3	14	18	2873
2,857.00	mir-26a-1	Homo sapiens	2222	2843	0	0	1	1	1	1	13	13	2857
2,295.00	mir-142	Homo sapiens	143	333	143	333	80	328	80	328	1454	1634	2295
2,148.00	mir-34c	Homo sapiens	171	1950	171	1950	28	46	28	46	143	152	2148
2,106.00	mir-375	Homo sapiens	0	0	0	0	424	1938	424	1938	149	168	2106
2,061.00	let-7g	Homo sapiens	423	2023	423	2009	0	0	0	0	31	38	2061
2,022.00	mir-205	Homo sapiens	424	2008	424	2008	0	1	0	1	9	13	2022
2,020.00	let-7f-2	Homo sapiens	397	1990	0	113	0	0	0	0	26	30	2020
1,998.00	mir-22	Homo sapiens	0	194	0	194	825	1696	825	1696	95	108	1998
1,966.00	mir-320a	Homo sapiens	0	0	0	0	661	1939	661	1884	5	27	1966
1,947.00	let-7f-1	Homo sapiens	398	1894	0	9	0	19	0	19	29	34	1947
1,936.00	let-7a-1	Homo sapiens	331	1825	0	3	8	44	0	0	52	67	1936
1,936.00	let-7a-3	Homo sapiens	331	1825	0	7	9	38	0	0	53	73	1936
1,867.00	let-7a-2	Homo sapiens	331	1803	0	0	0	0	0	0	50	64	1867
1,822.00	mir-25	Homo sapiens	2	9	2	9	960	1801	960	1801	9	12	1822
1,761.00	mir-449c	Homo sapiens	67	1719	67	1719	0	0	0	0	16	42	1761
1,754.00	mir-429	Homo sapiens	0	0	0	0	457	1700	457	1700	51	54	1754
1,682.00	mir-222	Homo sapiens	0	3	0	3	904	1598	904	1598	55	81	1682
1,543.00	mir-203b	Homo sapiens	1	1543	1	1543	0	0	0	0	0	0	1543
1,473.00	let-7c	Homo sapiens	759	1376	759	1370	0	1	0	1	87	96	1473
1,266.00	mir-143	Homo sapiens	0	0	0	0	825	1265	825	1265	0	1	1266
1,246.00	mir-223	Homo sapiens	2	140	2	140	198	1017	198	1017	72	89	1246
1,103.00	mir-30a	Homo sapiens	171	853	171	851	28	181	28	153	56	69	1103
1,080.00	mir-29a	Homo sapiens	0	0	0	0	28	905	28	905	163	175	1080
1,038.00	mir-30e	Homo sapiens	83	639	83	636	94	252	94	226	132	147	1038
874.00	mir-186	Homo sapiens	242	849	242	849	0	0	0	0	22	25	874
873.00	mir-128-1	Homo sapiens	0	0	0	0	241	866	0	306	0	7	873
830.00	mir-26b	Homo sapiens	331	826	331	826	0	4	0	4	0	0	830
803.00	mir-449a	Homo sapiens	432	739	432	724	0	0	0	0	47	64	803
789.00	mir-191	Homo sapiens	257	746	257	746	0	0	0	0	41	43	789
739.00	mir-361	Homo sapiens	11	33	11	33	30	664	30	664	39	42	739
724.00	mir-378a	Homo sapiens	1	3	1	3	3	721	3	721	0	0	724
715.00	mir-183	Homo sapiens	412	713	412	713	0	0	0	0	1	2	715
685.00	mir-140	Homo sapiens	54	127	54	127	55	375	55	375	43	183	685
644.00	mir-181a-2	Homo sapiens	27	514	0	0	0	16	0	16	101	114	644
636.00	mir-181a-1	Homo sapiens	27	510	0	0	0	3	0	3	108	123	636
619.00	mir-92b	Homo sapiens	0	76	0	76	54	348	54	344	138	195	619
577.00	mir-141	Homo sapiens	6	12	6	12	0	524	0	503	38	41	577
570.00	mir-224	Homo sapiens	0	273	0	273	0	4	0	4	265	293	570
570.00	mir-221	Homo sapiens	0	55	0	55	15	393	15	393	109	122	570
568.00	mir-128-2	Homo sapiens	0	0	0	0	242	568	0	10	0	0	568
559.00	mir-125a	Homo sapiens	17	434	17	434	0	15	0	15	97	110	559
495.00	mir-99b	Homo sapiens	99	421	99	420	26	50	26	50	20	24	495
463.00	mir-182	Homo sapiens	28	382	28	382	0	3	0	3	75	78	463
455.00	mir-3615	Homo sapiens	0	0	0	0	9	444	9	444	2	11	455
452.00	mir-16-2	Homo sapiens	34	216	0	0	24	214	24	214	21	22	452
448.00	mir-1246	Homo sapiens	13	442	13	442	0	0	0	0	0	6	448
444.00	let-7d	Homo sapiens	1	426	1	419	0	12	0	12	6	6	444
443.00	mir-101-2	Homo sapiens	0	0	0	0	83	428	0	32	11	15	443
442.00	mir-92a-1	Homo sapiens	0	0	0	0	174	436	0	41	1	6	442
420.00	mir-28	Homo sapiens	11	117	11	117	94	292	94	292	10	11	420
418.00	mir-192	Homo sapiens	42	253	42	252	0	0	0	0	130	165	418
416.00	mir-101-1	Homo sapiens	0	0	0	0	83	402	0	1	12	14	416
411.00	mir-340	Homo sapiens	245	364	245	364	13	42	13	42	5	5	411
399.00	mir-92a-2	Homo sapiens	0	0	0	0	174	395	0	4	1	4	399
390.00	mir-3184	Homo sapiens	0	130	0	130	0	0	0	0	233	260	390
382.00	mir-184	Homo sapiens	0	0	0	0	268	362	268	362	16	20	382
378.00	mir-148b	Homo sapiens	0	6	0	6	133	364	133	274	6	8	378
347.00	mir-532	Homo sapiens	265	343	265	343	1	3	1	3	1	1	347
308.00	mir-342	Homo sapiens	55	243	55	243	9	55	9	55	10	10	308
273.00	mir-1180	Homo sapiens	0	0	0	0	117	261	117	261	11	12	273
259.00	mir-1307	Homo sapiens	2	9	2	9	0	249	0	249	0	1	259
256.00	mir-155	Homo sapiens	0	220	0	220	0	0	0	0	29	36	256
237.00	mir-363	Homo sapiens	0	0	0	0	164	236	164	236	1	1	237
218.00	mir-16-1	Homo sapiens	33	217	0	1	0	0	0	0	1	1	218
199.00	mir-451a	Homo sapiens	1	199	1	199	0	0	0	0	0	0	199
198.00	mir-425	Homo sapiens	20	168	20	168	0	15	0	15	9	15	198
191.00	mir-744	Homo sapiens	15	186	15	186	0	0	0	0	3	5	191
185.00	mir-98	Homo sapiens	93	151	93	151	0	3	0	3	26	31	185
176.00	mir-24-2	Homo sapiens	0	76	0	76	0	88	0	0	11	12	176
175.00	mir-7-2	Homo sapiens	108	153	0	1	0	0	0	0	17	22	175
175.00	mir-152	Homo sapiens	0	0	0	0	41	174	41	174	0	1	175
169.00	mir-7-3	Homo sapiens	108	150	0	0	0	0	0	0	18	19	169
165.00	mir-7-1	Homo sapiens	107	146	0	2	0	0	0	0	19	19	165
156.00	mir-181b-2	Homo sapiens	21	67	0	0	0	0	0	0	78	89	156
156.00	mir-181b-1	Homo sapiens	21	66	0	0	0	1	0	1	80	89	156
153.00	mir-32	Homo sapiens	102	141	102	141	0	10	0	10	2	2	153
153.00	mir-23a	Homo sapiens	0	9	0	9	0	142	0	142	0	2	153
150.00	mir-582	Homo sapiens	0	1	0	1	114	147	114	147	2	2	150
148.00	mir-100	Homo sapiens	2	142	2	134	0	0	0	0	4	6	148
148.00	mir-106b	Homo sapiens	4	20	4	20	14	108	14	108	19	20	148
142.00	mir-125b-2	Homo sapiens	14	109	0	0	0	3	0	3	27	30	142
136.00	mir-30c-2	Homo sapiens	55	119	0	0	0	2	0	2	14	15	136
134.00	mir-125b-1	Homo sapiens	13	103	0	0	0	3	0	3	27	28	134
133.00	mir-30c-1	Homo sapiens	56	116	0	0	0	2	0	2	14	15	133
122.00	mir-132	Homo sapiens	10	51	10	51	3	37	3	37	31	34	122
115.00	mir-345	Homo sapiens	22	110	22	110	0	0	0	0	5	5	115
112.00	mir-34b	Homo sapiens	0	9	0	9	0	103	0	103	0	0	112
110.00	mir-3960	Homo sapiens	0	0	0	0	0	12	0	12	0	98	110
108.00	mir-449b	Homo sapiens	51	95	51	78	10	11	10	11	2	2	108
107.00	mir-24-1	Homo sapiens	0	13	0	13	0	91	0	3	3	3	107
103.00	mir-135b	Homo sapiens	91	103	91	103	0	0	0	0	0	0	103
103.00	mir-484	Homo sapiens	31	103	31	103	0	0	0	0	0	0	103
100.00	mir-629	Homo sapiens	54	98	54	98	0	0	0	0	0	2	100
88.00	mir-1290	Homo sapiens	0	0	0	0	0	88	0	88	0	0	88
84.00	let-7e	Homo sapiens	8	83	8	78	0	0	0	0	1	1	84
83.00	mir-23b	Homo sapiens	5	32	5	32	0	28	0	28	11	23	83
83.00	mir-95	Homo sapiens	0	0	0	0	3	83	3	83	0	0	83
82.00	mir-2110	Homo sapiens	8	69	8	69	0	0	0	0	10	13	82
82.00	mir-941-5	Homo sapiens	0	0	0	0	35	81	0	0	1	1	82
80.00	mir-941-3	Homo sapiens	0	0	0	0	35	78	0	0	1	2	80
80.00	mir-941-4	Homo sapiens	0	0	0	0	35	80	0	0	0	0	80
78.00	mir-708	Homo sapiens	2	5	2	5	0	68	0	68	5	5	78
78.00	mir-941-1	Homo sapiens	0	0	0	0	35	77	0	0	1	1	78
78.00	mir-941-2	Homo sapiens	0	0	0	0	35	77	0	0	0	1	78
77.00	mir-150	Homo sapiens	39	74	39	74	0	3	0	3	0	0	77
74.00	mir-103b-2	Homo sapiens	31	68	0	0	0	0	0	0	6	6	74
74.00	mir-199b	Homo sapiens	2	42	2	42	0	27	0	0	5	5	74
74.00	mir-126	Homo sapiens	0	0	0	0	13	73	13	73	1	1	74
73.00	mir-338	Homo sapiens	0	73	0	73	0	0	0	0	0	0	73
73.00	mir-218-1	Homo sapiens	33	72	0	0	0	0	0	0	1	1	73
73.00	mir-769	Homo sapiens	24	70	24	70	0	0	0	0	3	3	73
72.00	mir-1301	Homo sapiens	0	0	0	0	2	35	2	35	32	37	72
71.00	mir-218-2	Homo sapiens	33	69	0	0	0	0	0	0	1	2	71
71.00	mir-103b-1	Homo sapiens	31	64	0	0	0	0	0	0	6	7	71
66.00	mir-10400	Homo sapiens	0	66	0	66	0	0	0	0	0	0	66
66.00	mir-328	Homo sapiens	0	0	0	0	28	60	28	60	6	6	66
64.00	mir-10a	Homo sapiens	4	60	4	60	0	0	0	0	4	4	64
64.00	mir-9-1	Homo sapiens	3	29	0	0	0	3	0	0	30	32	64
62.00	mir-96	Homo sapiens	49	62	49	62	0	0	0	0	0	0	62
62.00	mir-193a	Homo sapiens	8	57	8	57	0	0	0	0	4	5	62
62.00	mir-9-2	Homo sapiens	3	27	0	0	0	2	0	0	30	33	62
62.00	mir-9-3	Homo sapiens	3	26	0	0	0	3	0	0	29	33	62
60.00	mir-320b-2	Homo sapiens	0	0	0	0	0	60	0	0	0	0	60
59.00	mir-190b	Homo sapiens	39	59	39	59	0	0	0	0	0	0	59
58.00	mir-618	Homo sapiens	37	55	37	55	0	0	0	0	3	3	58
58.00	mir-625	Homo sapiens	3	31	3	31	0	27	0	27	0	0	58
56.00	mir-452	Homo sapiens	5	23	5	23	0	0	0	0	32	33	56
56.00	mir-320b-1	Homo sapiens	0	0	0	0	0	56	0	0	0	0	56
55.00	mir-652	Homo sapiens	0	0	0	0	37	55	37	55	0	0	55
54.00	mir-424	Homo sapiens	0	1	0	1	17	53	17	53	0	0	54
52.00	mir-1843	Homo sapiens	0	48	0	48	0	0	0	0	0	4	52
52.00	mir-8072	Homo sapiens	0	0	0	0	0	0	0	0	0	52	52
51.00	mir-339	Homo sapiens	6	16	6	16	4	33	4	33	2	2	51
50.00	mir-185	Homo sapiens	2	46	2	46	0	4	0	4	0	0	50
49.00	mir-6510	Homo sapiens	0	0	0	0	23	49	23	49	0	0	49
48.00	mir-499a	Homo sapiens	10	48	10	48	0	0	0	0	0	0	48
48.00	mir-330	Homo sapiens	0	36	0	36	1	12	1	12	0	0	48
47.00	mir-20a	Homo sapiens	38	47	38	47	0	0	0	0	0	0	47
44.00	mir-511	Homo sapiens	20	41	20	41	0	0	0	0	2	3	44
43.00	mir-19a	Homo sapiens	0	0	0	0	0	43	0	43	0	0	43
43.00	mir-501	Homo sapiens	0	0	0	0	7	43	7	43	0	0	43
43.00	mir-6842	Homo sapiens	0	0	0	0	15	42	15	42	0	1	43
42.00	mir-7706	Homo sapiens	0	0	0	0	3	35	3	35	6	7	42
39.00	mir-30b	Homo sapiens	4	35	4	35	0	3	0	3	1	1	39
39.00	mir-3159	Homo sapiens	0	0	0	0	0	0	0	0	3	39	39
38.00	mir-8086	Homo sapiens	0	0	0	0	0	0	0	0	5	38	38
37.00	mir-374a	Homo sapiens	3	26	3	26	0	7	0	7	4	4	37
37.00	mir-210	Homo sapiens	0	0	0	0	3	34	3	34	2	3	37
36.00	mir-378i	Homo sapiens	0	36	0	36	0	0	0	0	0	0	36
36.00	mir-628	Homo sapiens	3	14	3	14	6	20	6	20	1	2	36
35.00	mir-374b	Homo sapiens	9	34	9	34	0	1	0	1	0	0	35
33.00	mir-199a-1	Homo sapiens	2	2	0	0	0	29	0	0	1	2	33
32.00	mir-181d	Homo sapiens	6	18	6	18	0	0	0	0	10	14	32
32.00	mir-29c	Homo sapiens	0	11	0	11	3	20	3	20	1	1	32
32.00	mir-199a-2	Homo sapiens	2	2	0	0	0	28	0	2	2	2	32
30.00	mir-3613	Homo sapiens	11	30	11	30	0	0	0	0	0	0	30
30.00	mir-147b	Homo sapiens	0	1	0	1	0	29	0	29	0	0	30
29.00	mir-194-1	Homo sapiens	1	28	0	0	0	0	0	0	1	1	29
29.00	mir-194-2	Homo sapiens	1	27	0	0	0	1	0	1	1	1	29
29.00	mir-29b-2	Homo sapiens	0	0	0	0	6	17	0	0	10	12	29
29.00	mir-197	Homo sapiens	0	0	0	0	21	29	21	29	0	0	29
28.00	mir-149	Homo sapiens	0	17	0	17	0	0	0	0	10	11	28
28.00	mir-421	Homo sapiens	0	0	0	0	0	28	0	28	0	0	28
27.00	mir-3614	Homo sapiens	0	24	0	24	0	1	0	1	2	2	27
27.00	mir-145	Homo sapiens	1	5	1	5	3	22	3	22	0	0	27
26.00	mir-486-2	Homo sapiens	8	26	0	1	0	0	0	0	0	0	26
24.00	mir-486-1	Homo sapiens	7	23	0	1	0	0	0	0	0	1	24
24.00	mir-15b	Homo sapiens	7	9	7	9	1	14	1	14	1	1	24
24.00	mir-1285-1	Homo sapiens	0	0	0	0	0	4	0	0	2	20	24
23.00	mir-450a-2	Homo sapiens	1	19	0	1	0	3	0	3	1	1	23
22.00	mir-450a-1	Homo sapiens	0	22	0	0	0	0	0	0	0	0	22
22.00	mir-29b-1	Homo sapiens	1	1	1	1	5	12	0	0	9	9	22
21.00	mir-2115	Homo sapiens	0	14	0	14	0	7	0	7	0	0	21
21.00	mir-10399	Homo sapiens	1	3	1	3	0	10	0	10	8	8	21
21.00	mir-574	Homo sapiens	0	2	0	2	6	14	6	14	4	5	21
20.00	mir-455	Homo sapiens	1	16	1	16	0	0	0	0	1	4	20
20.00	mir-619	Homo sapiens	0	12	0	12	0	0	0	0	0	8	20
20.00	mir-4446	Homo sapiens	0	0	0	0	4	17	4	17	3	3	20
18.00	mir-31	Homo sapiens	1	14	1	14	4	4	4	4	0	0	18
18.00	mir-4485	Homo sapiens	0	0	0	0	0	8	0	8	5	10	18
18.00	mir-3529	Homo sapiens	0	0	0	0	0	0	0	0	18	18	18
17.00	mir-651	Homo sapiens	2	17	2	17	0	0	0	0	0	0	17
17.00	mir-671	Homo sapiens	0	5	0	5	2	10	2	10	2	2	17
17.00	mir-1273h	Homo sapiens	0	2	0	2	1	7	1	7	1	8	17
16.00	mir-19b-2	Homo sapiens	0	0	0	0	2	16	0	0	0	0	16
15.00	mir-1306	Homo sapiens	0	0	0	0	0	7	0	7	4	8	15
14.00	mir-1287	Homo sapiens	5	14	5	14	0	0	0	0	0	0	14
14.00	mir-942	Homo sapiens	1	9	1	9	0	0	0	0	3	5	14
14.00	mir-378c	Homo sapiens	0	8	0	8	0	0	0	0	6	6	14
14.00	mir-19b-1	Homo sapiens	0	0	0	0	2	14	0	0	0	0	14
13.00	mir-505	Homo sapiens	1	7	1	7	1	5	1	5	1	1	13
12.00	mir-660	Homo sapiens	0	9	0	9	0	3	0	3	0	0	12
12.00	mir-3605	Homo sapiens	2	7	2	7	0	4	0	4	1	1	12
12.00	mir-130b	Homo sapiens	0	6	0	6	0	6	0	6	0	0	12
12.00	mir-181c	Homo sapiens	2	3	2	3	0	9	0	9	0	0	12
12.00	mir-590	Homo sapiens	0	0	0	0	5	12	5	12	0	0	12
11.00	mir-204	Homo sapiens	1	10	1	10	0	1	0	1	0	0	11
11.00	mir-760	Homo sapiens	0	0	0	0	2	11	2	11	0	0	11
11.00	mir-1303	Homo sapiens	0	0	0	0	1	8	1	8	2	3	11
11.00	mir-548o-2	Homo sapiens	0	0	0	0	9	11	0	0	0	0	11
10.00	mir-589	Homo sapiens	0	10	0	10	0	0	0	0	0	0	10
10.00	mir-503	Homo sapiens	0	2	0	2	0	0	0	0	8	8	10
10.00	mir-548o	Homo sapiens	0	0	0	0	8	10	0	0	0	0	10
10.00	mir-4664	Homo sapiens	0	0	0	0	0	10	0	10	0	0	10
9.00	mir-934	Homo sapiens	0	9	0	9	0	0	0	0	0	0	9
9.00	mir-17	Homo sapiens	0	8	0	8	0	1	0	1	0	0	9
9.00	mir-4746	Homo sapiens	4	8	4	8	0	0	0	0	1	1	9
9.00	mir-335	Homo sapiens	0	5	0	5	3	4	3	4	0	0	9
9.00	mir-4677	Homo sapiens	0	3	0	3	2	6	2	6	0	0	9
8.00	mir-659	Homo sapiens	8	8	8	8	0	0	0	0	0	0	8
8.00	mir-548f-1	Homo sapiens	0	8	0	8	0	0	0	0	0	0	8
8.00	mir-378d-2	Homo sapiens	0	7	0	7	0	0	0	0	0	1	8
8.00	mir-1293	Homo sapiens	0	7	0	7	0	0	0	0	1	1	8
8.00	mir-18a	Homo sapiens	2	3	2	3	0	5	0	5	0	0	8
8.00	mir-2355	Homo sapiens	0	2	0	2	3	6	3	6	0	0	8
8.00	mir-130a	Homo sapiens	0	0	0	0	0	8	0	8	0	0	8
8.00	mir-500a	Homo sapiens	0	0	0	0	0	6	0	6	2	2	8
8.00	mir-542	Homo sapiens	0	0	0	0	0	7	0	7	1	1	8
8.00	mir-1304	Homo sapiens	0	0	0	0	0	5	0	5	0	3	8
8.00	mir-3177	Homo sapiens	0	0	0	0	4	8	4	8	0	0	8
8.00	mir-5684	Homo sapiens	0	0	0	0	0	0	0	0	0	8	8
7.00	mir-9985	Homo sapiens	0	7	0	7	0	0	0	0	0	0	7
7.00	mir-450b	Homo sapiens	4	6	4	6	0	0	0	0	1	1	7
7.00	mir-3158-2	Homo sapiens	0	4	0	0	0	3	0	0	0	0	7
7.00	mir-193b	Homo sapiens	0	3	0	3	3	4	3	4	0	0	7
7.00	mir-324	Homo sapiens	0	1	0	1	0	0	0	0	3	6	7
7.00	mir-6503	Homo sapiens	0	1	0	1	0	5	0	5	0	1	7
7.00	mir-12136	Homo sapiens	0	1	0	1	0	0	0	0	5	6	7
7.00	mir-103a-2	Homo sapiens	0	0	0	0	0	1	0	0	5	6	7
7.00	mir-103a-1	Homo sapiens	0	0	0	0	0	1	0	0	6	6	7
7.00	mir-107	Homo sapiens	0	0	0	0	0	0	0	0	6	7	7
7.00	mir-502	Homo sapiens	0	0	0	0	3	7	3	7	0	0	7
7.00	mir-766	Homo sapiens	0	0	0	0	0	5	0	5	2	2	7
7.00	mir-873	Homo sapiens	0	0	0	0	1	1	1	1	5	6	7
7.00	mir-4472-2	Homo sapiens	0	0	0	0	0	0	0	0	1	7	7
6.00	mir-139	Homo sapiens	2	6	2	6	0	0	0	0	0	0	6
6.00	mir-584	Homo sapiens	0	4	0	4	0	0	0	0	2	2	6
6.00	mir-320c-2	Homo sapiens	0	0	0	0	3	6	0	0	0	0	6
6.00	mir-3909	Homo sapiens	0	0	0	0	2	3	2	3	2	3	6
6.00	mir-3929	Homo sapiens	0	0	0	0	0	0	0	0	2	6	6
6.00	mir-4454	Homo sapiens	0	0	0	0	0	0	0	0	0	6	6
6.00	mir-10395	Homo sapiens	0	0	0	0	0	6	0	6	0	0	6
5.00	mir-331	Homo sapiens	0	5	0	5	0	0	0	0	0	0	5
5.00	mir-3158-1	Homo sapiens	0	5	0	0	0	0	0	0	0	0	5
5.00	mir-34a	Homo sapiens	0	4	0	4	0	0	0	0	1	1	5
5.00	mir-1291	Homo sapiens	0	4	0	4	0	0	0	0	1	1	5
5.00	mir-3150a	Homo sapiens	1	4	1	4	0	0	0	0	1	1	5
5.00	mir-3690-2	Homo sapiens	2	4	0	0	0	0	0	0	1	1	5
5.00	mir-548ay	Homo sapiens	1	3	1	3	0	2	0	2	0	0	5
5.00	mir-212	Homo sapiens	1	2	1	2	0	0	0	0	3	3	5
5.00	mir-576	Homo sapiens	0	0	0	0	1	4	1	4	1	1	5
5.00	mir-320c-1	Homo sapiens	0	0	0	0	3	5	0	1	0	0	5
5.00	mir-944	Homo sapiens	0	0	0	0	0	3	0	3	2	2	5
5.00	mir-1285-2	Homo sapiens	0	0	0	0	0	3	0	0	1	2	5
5.00	mir-1277	Homo sapiens	0	0	0	0	0	3	0	3	1	2	5
5.00	mir-1278	Homo sapiens	0	0	0	0	2	5	2	5	0	0	5
5.00	mir-1292	Homo sapiens	0	0	0	0	0	0	0	0	4	5	5
5.00	mir-7851	Homo sapiens	0	0	0	0	0	0	0	0	0	5	5
4.00	mir-15a	Homo sapiens	1	4	1	4	0	0	0	0	0	0	4
4.00	mir-301a	Homo sapiens	3	4	3	4	0	0	0	0	0	0	4
4.00	mir-504	Homo sapiens	0	4	0	4	0	0	0	0	0	0	4
4.00	mir-548d-1	Homo sapiens	0	4	0	0	0	0	0	0	0	0	4
4.00	mir-548d-2	Homo sapiens	0	4	0	0	0	0	0	0	0	0	4
4.00	mir-548k	Homo sapiens	1	4	1	4	0	0	0	0	0	0	4
4.00	mir-3065	Homo sapiens	0	4	0	4	0	0	0	0	0	0	4
4.00	mir-4466	Homo sapiens	0	4	0	4	0	0	0	0	0	0	4
4.00	mir-3064	Homo sapiens	0	4	0	4	0	0	0	0	0	0	4
4.00	mir-3913-2	Homo sapiens	0	3	0	0	0	0	0	0	1	1	4
4.00	mir-548az	Homo sapiens	0	3	0	3	0	0	0	0	1	1	4
4.00	mir-6515	Homo sapiens	0	2	0	2	0	2	0	2	0	0	4
4.00	mir-6821	Homo sapiens	0	2	0	2	0	2	0	2	0	0	4
4.00	mir-548q	Homo sapiens	0	1	0	1	0	0	0	0	3	3	4
4.00	mir-187	Homo sapiens	0	0	0	0	0	4	0	4	0	0	4
4.00	mir-514a-3	Homo sapiens	0	0	0	0	4	4	0	0	0	0	4
4.00	mir-3135a	Homo sapiens	0	0	0	0	0	0	0	0	0	4	4
4.00	mir-4430	Homo sapiens	0	0	0	0	0	0	0	0	0	4	4
3.00	mir-422a	Homo sapiens	0	3	0	3	0	0	0	0	0	0	3
3.00	mir-556	Homo sapiens	0	3	0	3	0	0	0	0	0	0	3
3.00	mir-454	Homo sapiens	0	3	0	3	0	0	0	0	0	0	3
3.00	mir-1255a	Homo sapiens	0	3	0	3	0	0	0	0	0	0	3
3.00	mir-642b	Homo sapiens	2	3	2	3	0	0	0	0	0	0	3
3.00	mir-371b	Homo sapiens	3	3	3	3	0	0	0	0	0	0	3
3.00	mir-10527	Homo sapiens	0	3	0	3	0	0	0	0	0	0	3
3.00	mir-195	Homo sapiens	1	2	1	2	1	1	1	1	0	0	3
3.00	mir-641	Homo sapiens	0	2	0	2	0	0	0	0	1	1	3
3.00	mir-877	Homo sapiens	0	2	0	2	0	0	0	0	0	1	3
3.00	mir-509-3	Homo sapiens	0	2	0	2	0	0	0	0	1	1	3
3.00	mir-3690-1	Homo sapiens	2	2	0	0	0	0	0	0	1	1	3
3.00	mir-3913-1	Homo sapiens	0	2	0	0	0	0	0	0	1	1	3
3.00	mir-144	Homo sapiens	1	1	1	1	1	2	1	2	0	0	3
3.00	mir-378g	Homo sapiens	0	1	0	1	0	0	0	0	0	2	3
3.00	mir-3135b	Homo sapiens	0	1	0	1	0	0	0	0	0	2	3
3.00	mir-7976	Homo sapiens	0	1	0	1	0	0	0	0	2	2	3
3.00	mir-203a	Homo sapiens	0	0	0	0	0	3	0	3	0	0	3
3.00	mir-1-2	Homo sapiens	0	0	0	0	0	3	0	0	0	0	3
3.00	mir-1-1	Homo sapiens	0	0	0	0	1	2	0	0	0	1	3
3.00	mir-514a-1	Homo sapiens	0	0	0	0	3	3	0	0	0	0	3
3.00	mir-514a-2	Homo sapiens	0	0	0	0	3	3	0	0	0	0	3
3.00	mir-552	Homo sapiens	0	0	0	0	0	3	0	3	0	0	3
3.00	mir-598	Homo sapiens	0	0	0	0	0	3	0	3	0	0	3
3.00	mir-320d-1	Homo sapiens	0	0	0	0	2	3	0	1	0	0	3
3.00	mir-1910	Homo sapiens	0	0	0	0	0	3	0	3	0	0	3
3.00	mir-548u	Homo sapiens	0	0	0	0	0	3	0	3	0	0	3
3.00	mir-4284	Homo sapiens	0	0	0	0	0	0	0	0	0	3	3
3.00	mir-3912	Homo sapiens	0	0	0	0	3	3	3	3	0	0	3
3.00	mir-3928	Homo sapiens	0	0	0	0	0	3	0	3	0	0	3
3.00	mir-378f	Homo sapiens	0	0	0	0	0	2	0	2	0	1	3
3.00	mir-4448	Homo sapiens	0	0	0	0	0	3	0	3	0	0	3
3.00	mir-4742	Homo sapiens	0	0	0	0	0	2	0	2	1	1	3
3.00	mir-5010	Homo sapiens	0	0	0	0	0	3	0	3	0	0	3
2.00	mir-134	Homo sapiens	0	2	0	2	0	0	0	0	0	0	2
2.00	mir-365a	Homo sapiens	0	2	0	2	0	0	0	0	0	0	2
2.00	mir-196b	Homo sapiens	0	2	0	2	0	0	0	0	0	0	2
2.00	mir-1468	Homo sapiens	0	2	0	2	0	0	0	0	0	0	2
2.00	mir-1271	Homo sapiens	0	2	0	2	0	0	0	0	0	0	2
2.00	mir-548g	Homo sapiens	0	2	0	0	0	0	0	0	0	0	2
2.00	mir-1262	Homo sapiens	1	2	1	2	0	0	0	0	0	0	2
2.00	mir-1255b-1	Homo sapiens	1	2	0	0	0	0	0	0	0	0	2
2.00	mir-548x	Homo sapiens	0	2	0	0	0	0	0	0	0	0	2
2.00	mir-3616	Homo sapiens	0	2	0	2	0	0	0	0	0	0	2
2.00	mir-3180-4	Homo sapiens	1	2	0	0	0	0	0	0	0	0	2
2.00	mir-4510	Homo sapiens	0	2	0	0	0	0	0	0	0	0	2
2.00	mir-4648	Homo sapiens	0	2	0	2	0	0	0	0	0	0	2
2.00	mir-4662a	Homo sapiens	2	2	2	2	0	0	0	0	0	0	2
2.00	mir-4707	Homo sapiens	2	2	2	2	0	0	0	0	0	0	2
2.00	mir-4750	Homo sapiens	0	2	0	2	0	0	0	0	0	0	2
2.00	mir-4774	Homo sapiens	0	2	0	2	0	0	0	0	0	0	2
2.00	mir-6875	Homo sapiens	0	2	0	2	0	0	0	0	0	0	2
2.00	mir-6886	Homo sapiens	0	2	0	2	0	0	0	0	0	0	2
2.00	mir-215	Homo sapiens	0	1	0	0	0	0	0	0	0	1	2
2.00	mir-188	Homo sapiens	1	1	1	1	1	1	1	1	0	0	2
2.00	mir-20b	Homo sapiens	1	1	1	1	0	0	0	0	1	1	2
2.00	mir-7850	Homo sapiens	0	1	0	1	0	0	0	0	0	1	2
2.00	mir-381	Homo sapiens	0	0	0	0	2	2	2	2	0	0	2
2.00	mir-409	Homo sapiens	0	0	0	0	1	2	1	2	0	0	2
2.00	mir-597	Homo sapiens	0	0	0	0	0	0	0	0	2	2	2
2.00	mir-599	Homo sapiens	0	0	0	0	0	0	0	0	1	2	2
2.00	mir-636	Homo sapiens	0	0	0	0	0	2	0	2	0	0	2
2.00	mir-874	Homo sapiens	0	0	0	0	0	2	0	2	0	0	2
2.00	mir-933	Homo sapiens	0	0	0	0	0	0	0	0	1	2	2
2.00	mir-1299	Homo sapiens	0	0	0	0	0	1	0	1	1	1	2
2.00	mir-548f-3	Homo sapiens	0	0	0	0	0	2	0	0	0	0	2
2.00	mir-320d-2	Homo sapiens	0	0	0	0	2	2	0	0	0	0	2
2.00	mir-3127	Homo sapiens	0	0	0	0	1	1	1	1	1	1	2
2.00	mir-3132	Homo sapiens	0	0	0	0	0	0	0	0	0	2	2
2.00	mir-1273c	Homo sapiens	0	0	0	0	0	0	0	0	0	2	2
2.00	mir-3665	Homo sapiens	0	0	0	0	0	0	0	0	0	2	2
2.00	mir-3682	Homo sapiens	0	0	0	0	1	2	1	2	0	0	2
2.00	mir-4424	Homo sapiens	0	0	0	0	0	0	0	0	2	2	2
2.00	mir-4440	Homo sapiens	0	0	0	0	0	0	0	0	0	2	2
2.00	mir-4477b	Homo sapiens	0	0	0	0	0	2	0	2	0	0	2
2.00	mir-1343	Homo sapiens	0	0	0	0	0	2	0	2	0	0	2
2.00	mir-4757	Homo sapiens	0	0	0	0	0	0	0	0	2	2	2
2.00	mir-4758	Homo sapiens	0	0	0	0	0	0	0	0	2	2	2
2.00	mir-5196	Homo sapiens	0	0	0	0	2	2	2	2	0	0	2
2.00	mir-5571	Homo sapiens	0	0	0	0	0	0	0	0	2	2	2
2.00	mir-5585	Homo sapiens	0	0	0	0	0	1	0	1	0	1	2
2.00	mir-548au	Homo sapiens	0	0	0	0	0	2	0	2	0	0	2
2.00	mir-548ax	Homo sapiens	0	0	0	0	0	0	0	0	1	2	2
2.00	mir-6127	Homo sapiens	0	0	0	0	0	0	0	0	0	2	2
2.00	mir-6758	Homo sapiens	0	0	0	0	0	2	0	2	0	0	2
2.00	mir-6777	Homo sapiens	0	0	0	0	0	2	0	2	0	0	2
2.00	mir-6808	Homo sapiens	0	0	0	0	1	2	1	2	0	0	2
2.00	mir-6837	Homo sapiens	0	0	0	0	0	0	0	0	0	2	2
2.00	mir-6843	Homo sapiens	0	0	0	0	1	2	1	2	0	0	2
2.00	mir-6868	Homo sapiens	0	0	0	0	0	2	0	2	0	0	2
2.00	mir-7109	Homo sapiens	0	0	0	0	0	2	0	2	0	0	2
2.00	mir-9903	Homo sapiens	0	0	0	0	0	2	0	2	0	0	2
1.00	mir-33a	Homo sapiens	0	1	0	1	0	0	0	0	0	0	1
1.00	mir-196a-1	Homo sapiens	1	1	0	0	0	0	0	0	0	0	1
1.00	mir-10b	Homo sapiens	1	1	1	1	0	0	0	0	0	0	1
1.00	mir-122	Homo sapiens	1	1	1	1	0	0	0	0	0	0	1
1.00	mir-379	Homo sapiens	1	1	1	1	0	0	0	0	0	0	1
1.00	mir-382	Homo sapiens	0	1	0	1	0	0	0	0	0	0	1
1.00	mir-561	Homo sapiens	0	1	0	1	0	0	0	0	0	0	1
1.00	mir-548c	Homo sapiens	0	1	0	0	0	0	0	0	0	0	1
1.00	mir-642a	Homo sapiens	0	1	0	1	0	0	0	0	0	0	1
1.00	mir-549a	Homo sapiens	0	1	0	1	0	0	0	0	0	0	1
1.00	mir-1228	Homo sapiens	0	1	0	1	0	0	0	0	0	0	1
1.00	mir-548j	Homo sapiens	1	1	1	1	0	0	0	0	0	0	1
1.00	mir-1294	Homo sapiens	0	1	0	1	0	0	0	0	0	0	1
1.00	mir-548h-3	Homo sapiens	1	1	0	0	0	0	0	0	0	0	1
1.00	mir-1284	Homo sapiens	0	1	0	1	0	0	0	0	0	0	1
1.00	mir-664a	Homo sapiens	0	1	0	1	0	0	0	0	0	0	1
1.00	mir-3124	Homo sapiens	0	1	0	1	0	0	0	0	0	0	1
1.00	mir-3175	Homo sapiens	0	1	0	1	0	0	0	0	0	0	1
1.00	mir-3622a	Homo sapiens	1	1	1	1	0	0	0	0	0	0	1
1.00	mir-3685	Homo sapiens	0	1	0	1	0	0	0	0	0	0	1
1.00	mir-3180-5	Homo sapiens	0	1	0	0	0	0	0	0	0	0	1
1.00	mir-3918	Homo sapiens	1	1	1	1	0	0	0	0	0	0	1
1.00	mir-676	Homo sapiens	0	1	0	1	0	0	0	0	0	0	1
1.00	mir-3934	Homo sapiens	0	1	0	1	0	0	0	0	0	0	1
1.00	mir-3944	Homo sapiens	0	1	0	1	0	0	0	0	0	0	1
1.00	mir-548h-5	Homo sapiens	1	1	0	0	0	0	0	0	0	0	1
1.00	mir-4429	Homo sapiens	0	1	0	1	0	0	0	0	0	0	1
1.00	mir-548aj-2	Homo sapiens	0	1	0	0	0	0	0	0	0	0	1
1.00	mir-4488	Homo sapiens	0	1	0	1	0	0	0	0	0	0	1
1.00	mir-4489	Homo sapiens	1	1	1	1	0	0	0	0	0	0	1
1.00	mir-1269b	Homo sapiens	0	1	0	1	0	0	0	0	0	0	1
1.00	mir-4529	Homo sapiens	0	1	0	1	0	0	0	0	0	0	1
1.00	mir-4536-1	Homo sapiens	0	1	0	0	0	0	0	0	0	0	1
1.00	mir-4668	Homo sapiens	0	1	0	1	0	0	0	0	0	0	1
1.00	mir-4684	Homo sapiens	0	1	0	1	0	0	0	0	0	0	1
1.00	mir-4798	Homo sapiens	1	1	1	1	0	0	0	0	0	0	1
1.00	mir-6501	Homo sapiens	0	1	0	1	0	0	0	0	0	0	1
1.00	mir-6502	Homo sapiens	1	1	1	1	0	0	0	0	0	0	1
1.00	mir-6721	Homo sapiens	0	1	0	1	0	0	0	0	0	0	1
1.00	mir-6736	Homo sapiens	1	1	1	1	0	0	0	0	0	0	1
1.00	mir-6754	Homo sapiens	0	1	0	1	0	0	0	0	0	0	1
1.00	mir-6787	Homo sapiens	0	1	0	1	0	0	0	0	0	0	1
1.00	mir-6793	Homo sapiens	0	1	0	1	0	0	0	0	0	0	1
1.00	mir-6805	Homo sapiens	1	1	1	1	0	0	0	0	0	0	1
1.00	mir-6891	Homo sapiens	0	1	0	1	0	0	0	0	0	0	1
1.00	mir-7704	Homo sapiens	0	1	0	1	0	0	0	0	0	0	1
1.00	mir-7705	Homo sapiens	0	1	0	1	0	0	0	0	0	0	1
1.00	mir-6516	Homo sapiens	0	1	0	1	0	0	0	0	0	0	1
1.00	mir-93	Homo sapiens	0	0	0	0	0	1	0	1	0	0	1
1.00	mir-296	Homo sapiens	0	0	0	0	0	1	0	1	0	0	1
1.00	mir-370	Homo sapiens	0	0	0	0	0	1	0	1	0	0	1
1.00	mir-326	Homo sapiens	0	0	0	0	1	1	1	1	0	0	1
1.00	mir-506	Homo sapiens	0	0	0	0	0	1	0	1	0	0	1
1.00	mir-508	Homo sapiens	0	0	0	0	0	0	0	0	1	1	1
1.00	mir-548a-1	Homo sapiens	0	0	0	0	0	1	0	0	0	0	1
1.00	mir-548a-3	Homo sapiens	0	0	0	0	0	1	0	0	0	0	1
1.00	mir-663a	Homo sapiens	0	0	0	0	0	0	0	0	1	1	1
1.00	mir-943	Homo sapiens	0	0	0	0	1	1	1	1	0	0	1
1.00	mir-548e	Homo sapiens	0	0	0	0	1	1	1	1	0	0	1
1.00	mir-1289-1	Homo sapiens	0	0	0	0	0	0	0	0	1	1	1
1.00	mir-1295a	Homo sapiens	0	0	0	0	0	1	0	1	0	0	1
1.00	mir-548f-2	Homo sapiens	0	0	0	0	0	1	0	0	0	0	1
1.00	mir-1249	Homo sapiens	0	0	0	0	0	1	0	1	0	0	1
1.00	mir-1267	Homo sapiens	0	0	0	0	0	0	0	0	0	1	1
1.00	mir-1269a	Homo sapiens	0	0	0	0	0	1	0	1	0	0	1
1.00	mir-1288	Homo sapiens	0	0	0	0	1	1	1	1	0	0	1
1.00	mir-1972-1	Homo sapiens	0	0	0	0	0	0	0	0	0	1	1
1.00	mir-2116	Homo sapiens	0	0	0	0	0	1	0	1	0	0	1
1.00	mir-466	Homo sapiens	0	0	0	0	0	0	0	0	1	1	1
1.00	mir-3157	Homo sapiens	0	0	0	0	1	1	1	1	0	0	1
1.00	mir-3180-1	Homo sapiens	0	0	0	0	0	1	0	0	0	0	1
1.00	mir-548w	Homo sapiens	0	0	0	0	0	0	0	0	1	1	1
1.00	mir-320e	Homo sapiens	0	0	0	0	0	1	0	1	0	0	1
1.00	mir-4286	Homo sapiens	0	0	0	0	0	0	0	0	0	1	1
1.00	mir-3659	Homo sapiens	0	0	0	0	0	1	0	1	0	0	1
1.00	mir-3679	Homo sapiens	0	0	0	0	0	0	0	0	1	1	1
1.00	mir-3908	Homo sapiens	0	0	0	0	0	0	0	0	0	1	1
1.00	mir-3911	Homo sapiens	0	0	0	0	0	0	0	0	1	1	1
1.00	mir-3150b	Homo sapiens	0	0	0	0	0	0	0	0	1	1	1
1.00	mir-4449	Homo sapiens	0	0	0	0	0	1	0	1	0	0	1
1.00	mir-4452	Homo sapiens	0	0	0	0	0	0	0	0	0	1	1
1.00	mir-4493	Homo sapiens	0	0	0	0	0	1	0	1	0	0	1
1.00	mir-4504	Homo sapiens	0	0	0	0	1	1	1	1	0	0	1
1.00	mir-548am	Homo sapiens	0	0	0	0	0	1	0	1	0	0	1
1.00	mir-4638	Homo sapiens	0	0	0	0	0	1	0	1	0	0	1
1.00	mir-4645	Homo sapiens	0	0	0	0	0	1	0	1	0	0	1
1.00	mir-4658	Homo sapiens	0	0	0	0	0	0	0	0	1	1	1
1.00	mir-4671	Homo sapiens	0	0	0	0	1	1	1	1	0	0	1
1.00	mir-4772	Homo sapiens	0	0	0	0	0	0	0	0	1	1	1
1.00	mir-4773-2	Homo sapiens	0	0	0	0	0	1	0	0	0	0	1
1.00	mir-4781	Homo sapiens	0	0	0	0	0	1	0	1	0	0	1
1.00	mir-5001	Homo sapiens	0	0	0	0	0	1	0	1	0	0	1
1.00	mir-4436b-2	Homo sapiens	0	0	0	0	0	1	0	0	0	0	1
1.00	mir-664b	Homo sapiens	0	0	0	0	0	0	0	0	0	1	1
1.00	mir-1295b	Homo sapiens	0	0	0	0	0	1	0	1	0	0	1
1.00	mir-4666b	Homo sapiens	0	0	0	0	0	0	0	0	0	1	1
1.00	mir-5708	Homo sapiens	0	0	0	0	0	0	0	0	0	1	1
1.00	mir-6514	Homo sapiens	0	0	0	0	0	1	0	1	0	0	1
1.00	mir-6764	Homo sapiens	0	0	0	0	1	1	1	1	0	0	1
1.00	mir-6789	Homo sapiens	0	0	0	0	1	1	1	1	0	0	1
1.00	mir-6806	Homo sapiens	0	0	0	0	1	1	1	1	0	0	1
1.00	mir-6813	Homo sapiens	0	0	0	0	0	0	0	0	1	1	1
1.00	mir-6818	Homo sapiens	0	0	0	0	0	0	0	0	1	1	1
1.00	mir-6854	Homo sapiens	0	0	0	0	0	1	0	1	0	0	1
1.00	mir-6511a-2	Homo sapiens	0	0	0	0	1	1	0	0	0	0	1
1.00	mir-7703	Homo sapiens	0	0	0	0	0	0	0	0	1	1	1
1.00	mir-8064	Homo sapiens	0	0	0	0	0	0	0	0	0	1	1
1.00	mir-8485	Homo sapiens	0	0	0	0	0	0	0	0	0	1	1
1.00	mir-3648-2	Homo sapiens	0	0	0	0	0	0	0	0	1	1	1
0.00	mir-196a-2	Homo sapiens	0	0	0	0	0	0	0	0	0	0	0
0.00	mir-548a-2	Homo sapiens	0	0	0	0	0	0	0	0	0	0	0
0.00	mir-548n	Homo sapiens	0	0	0	0	0	0	0	0	0	0	0
0.00	mir-548h-1	Homo sapiens	0	0	0	0	0	0	0	0	0	0	0
0.00	mir-548h-2	Homo sapiens	0	0	0	0	0	0	0	0	0	0	0
0.00	mir-548h-4	Homo sapiens	0	0	0	0	0	0	0	0	0	0	0
0.00	mir-1255b-2	Homo sapiens	0	0	0	0	0	0	0	0	0	0	0
0.00	mir-548t	Homo sapiens	0	0	0	0	0	0	0	0	0	0	0
0.00	mir-3180-2	Homo sapiens	0	0	0	0	0	0	0	0	0	0	0
0.00	mir-3180-3	Homo sapiens	0	0	0	0	0	0	0	0	0	0	0
0.00	mir-1972-2	Homo sapiens	0	0	0	0	0	0	0	0	0	0	0
0.00	mir-3648-1	Homo sapiens	0	0	0	0	0	0	0	0	0	0	0
0.00	mir-548aa-1	Homo sapiens	0	0	0	0	0	0	0	0	0	0	0
0.00	mir-548aa-2	Homo sapiens	0	0	0	0	0	0	0	0	0	0	0
0.00	mir-548ab	Homo sapiens	0	0	0	0	0	0	0	0	0	0	0
0.00	mir-548ad	Homo sapiens	0	0	0	0	0	0	0	0	0	0	0
0.00	mir-4773-1	Homo sapiens	0	0	0	0	0	0	0	0	0	0	0
0.00	mir-4436b-1	Homo sapiens	0	0	0	0	0	0	0	0	0	0	0
0.00	mir-4536-2	Homo sapiens	0	0	0	0	0	0	0	0	0	0	0
0.00	mir-6511a-1	Homo sapiens	0	0	0	0	0	0	0	0	0	0	0
0.00	mir-6511a-3	Homo sapiens	0	0	0	0	0	0	0	0	0	0	0
0.00	mir-6511a-4	Homo sapiens	0	0	0	0	0	0	0	0	0	0	0

## Sheet: 10A
Expression values	Name	Resource	Exact mature 5'	Mature 5'	Unique exact mature 5'	Unique mature 5'	Exact mature 3'	Mature 3'	Unique exact mature 3'	Unique mature 3'	Exact other	Other	Total
159,495.00	mir-148a	Homo sapiens	56	81	56	81	141048	159305	141048	159104	97	109	159495
30,731.00	mir-99a	Homo sapiens	533	30687	533	30652	0	2	0	2	33	42	30731
28,334.00	mir-21	Homo sapiens	7886	27606	7886	27606	3	3	3	3	657	725	28334
26,521.00	let-7b	Homo sapiens	10037	24845	10037	24778	1	15	1	15	1488	1661	26521
20,531.00	mir-200b	Homo sapiens	119	408	119	408	2101	19999	2101	19970	32	124	20531
18,123.00	mir-34c	Homo sapiens	3998	16618	3998	16615	190	342	190	342	1113	1163	18123
15,100.00	mir-200a	Homo sapiens	683	1480	683	1480	12	13512	12	13498	98	108	15100
14,908.00	mir-27b	Homo sapiens	0	4	0	4	1184	14819	1184	14737	1	85	14908
13,602.00	mir-200c	Homo sapiens	0	1	0	1	5538	13247	5538	13218	320	354	13602
9,991.00	mir-151a	Homo sapiens	46	80	46	80	6325	9809	6325	9809	36	102	9991
9,637.00	mir-27a	Homo sapiens	23	52	23	52	76	9579	76	9500	3	6	9637
8,913.00	let-7i	Homo sapiens	6211	8679	6211	8662	0	1	0	1	198	233	8913
8,883.00	mir-26a-1	Homo sapiens	7219	8866	0	0	1	1	1	1	15	16	8883
8,880.00	mir-26a-2	Homo sapiens	7219	8847	0	0	1	4	1	4	15	29	8880
8,175.00	mir-30d	Homo sapiens	815	7819	815	7805	2	17	2	17	277	339	8175
7,678.00	mir-375	Homo sapiens	0	0	0	0	1836	7445	1836	7445	212	233	7678
7,067.00	let-7f-2	Homo sapiens	3276	7029	0	764	0	3	0	3	30	35	7067
6,364.00	let-7a-1	Homo sapiens	2860	6216	0	33	2	38	0	0	73	110	6364
6,351.00	let-7a-3	Homo sapiens	2860	6198	0	28	2	42	0	1	77	111	6351
6,343.00	let-7f-1	Homo sapiens	3276	6296	0	24	0	11	0	11	32	36	6343
6,270.00	let-7a-2	Homo sapiens	2859	6166	0	2	0	0	0	0	72	104	6270
6,185.00	mir-3074	Homo sapiens	3	6111	3	6111	0	74	0	74	0	0	6185
6,184.00	let-7g	Homo sapiens	3085	6138	3085	6106	0	0	0	0	40	46	6184
5,287.00	let-7c	Homo sapiens	3241	5130	3241	5045	0	4	0	4	127	153	5287
4,909.00	mir-423	Homo sapiens	1031	2257	1031	2257	918	2099	918	2099	482	553	4909
4,412.00	mir-205	Homo sapiens	589	4377	589	4377	0	0	0	0	18	35	4412
2,909.00	mir-320a	Homo sapiens	0	0	0	0	1061	2838	1061	2714	15	71	2909
2,737.00	mir-429	Homo sapiens	0	0	0	0	1233	2692	1233	2692	40	45	2737
2,636.00	mir-22	Homo sapiens	1	272	1	272	1118	2195	1118	2195	163	169	2636
2,348.00	mir-30a	Homo sapiens	239	1563	239	1551	161	529	161	493	221	256	2348
2,092.00	mir-10400	Homo sapiens	0	2091	0	2091	0	0	0	0	1	1	2092
2,090.00	mir-92b	Homo sapiens	0	87	0	87	515	1820	515	1783	135	183	2090
1,676.00	mir-203b	Homo sapiens	0	1673	0	1673	1	2	1	2	0	1	1676
1,650.00	mir-29a	Homo sapiens	0	1	0	1	41	1430	41	1429	197	219	1650
1,472.00	mir-183	Homo sapiens	841	1469	841	1469	0	0	0	0	0	3	1472
1,400.00	mir-3960	Homo sapiens	0	0	0	0	0	41	0	41	1	1359	1400
1,397.00	mir-744	Homo sapiens	113	1366	113	1366	0	0	0	0	14	31	1397
1,368.00	mir-128-1	Homo sapiens	0	0	0	0	338	1352	0	546	0	16	1368
1,304.00	mir-99b	Homo sapiens	372	1131	372	1130	112	161	112	161	11	12	1304
1,287.00	mir-125a	Homo sapiens	40	1114	40	1114	2	55	2	55	108	118	1287
1,218.00	mir-1180	Homo sapiens	0	0	0	0	722	1177	722	1177	37	41	1218
1,200.00	mir-182	Homo sapiens	392	1020	392	1020	0	10	0	10	153	170	1200
1,185.00	mir-378a	Homo sapiens	2	6	2	6	10	1179	10	1179	0	0	1185
1,164.00	mir-222	Homo sapiens	0	2	0	2	335	827	335	827	275	335	1164
1,150.00	mir-26b	Homo sapiens	363	1150	363	1150	0	0	0	0	0	0	1150
1,126.00	mir-191	Homo sapiens	574	1098	574	1098	0	6	0	6	15	22	1126
1,056.00	mir-34b	Homo sapiens	0	40	0	37	10	1014	10	1014	2	2	1056
1,017.00	mir-30e	Homo sapiens	48	420	48	411	153	377	153	341	190	220	1017
947.00	mir-146b	Homo sapiens	477	936	477	930	0	8	0	8	3	3	947
928.00	mir-25	Homo sapiens	9	32	9	32	470	871	470	871	5	25	928
925.00	mir-181a-2	Homo sapiens	89	746	0	0	18	34	18	34	131	145	925
909.00	mir-181a-1	Homo sapiens	89	753	0	0	1	4	1	4	138	152	909
859.00	mir-128-2	Homo sapiens	0	0	0	0	337	858	0	52	0	1	859
846.00	mir-3184	Homo sapiens	0	289	0	289	0	0	0	0	485	557	846
821.00	mir-2110	Homo sapiens	74	641	74	641	0	0	0	0	45	180	821
820.00	mir-148b	Homo sapiens	0	13	0	13	375	799	375	598	2	8	820
774.00	let-7e	Homo sapiens	305	766	305	727	0	0	0	0	7	8	774
715.00	mir-224	Homo sapiens	0	654	0	654	0	6	0	6	49	55	715
700.00	mir-141	Homo sapiens	23	50	23	50	0	592	0	578	53	58	700
683.00	mir-100	Homo sapiens	6	680	6	647	0	0	0	0	3	3	683
657.00	let-7d	Homo sapiens	5	607	5	586	0	40	0	40	7	10	657
645.00	mir-8072	Homo sapiens	0	0	0	0	0	0	0	0	2	645	645
602.00	mir-449c	Homo sapiens	87	551	87	551	0	4	0	4	1	47	602
566.00	mir-152	Homo sapiens	0	1	0	1	106	561	106	561	0	4	566
562.00	mir-146a	Homo sapiens	224	560	224	555	0	0	0	0	1	2	562
514.00	mir-92a-1	Homo sapiens	3	3	3	3	142	491	0	62	0	20	514
457.00	mir-184	Homo sapiens	0	0	0	0	304	424	304	424	31	33	457
453.00	mir-221	Homo sapiens	3	36	3	36	63	370	63	370	36	47	453
446.00	mir-92a-2	Homo sapiens	0	0	0	0	142	432	0	7	0	14	446
435.00	mir-101-2	Homo sapiens	0	0	0	0	60	419	0	28	15	16	435
434.00	mir-532	Homo sapiens	305	427	305	427	0	3	0	3	4	4	434
420.00	mir-28	Homo sapiens	15	164	15	164	80	246	80	246	5	10	420
417.00	mir-449a	Homo sapiens	203	377	203	369	0	0	0	0	28	40	417
412.00	mir-6510	Homo sapiens	0	0	0	0	86	412	86	412	0	0	412
400.00	mir-101-1	Homo sapiens	0	0	0	0	60	386	0	0	14	14	400
398.00	mir-23b	Homo sapiens	11	61	11	61	13	294	13	294	35	43	398
375.00	mir-192	Homo sapiens	41	281	41	281	0	0	0	0	61	94	375
369.00	mir-361	Homo sapiens	15	30	15	30	40	322	40	322	17	17	369
368.00	mir-125b-2	Homo sapiens	56	289	0	1	1	31	1	31	40	48	368
355.00	mir-186	Homo sapiens	121	350	121	350	0	0	0	0	5	5	355
346.00	mir-125b-1	Homo sapiens	55	300	0	7	1	5	1	5	39	41	346
324.00	mir-340	Homo sapiens	165	253	165	253	27	69	27	69	2	2	324
319.00	mir-190b	Homo sapiens	127	319	127	319	0	0	0	0	0	0	319
299.00	mir-1307	Homo sapiens	10	14	10	14	1	281	1	281	0	4	299
290.00	mir-30c-2	Homo sapiens	162	254	0	0	0	10	0	10	25	26	290
282.00	mir-30c-1	Homo sapiens	162	249	0	0	0	6	0	6	26	27	282
273.00	mir-1246	Homo sapiens	12	271	12	271	0	0	0	0	0	2	273
263.00	mir-98	Homo sapiens	142	227	142	217	0	1	0	1	23	35	263
262.00	mir-24-2	Homo sapiens	0	81	0	81	0	158	0	0	23	23	262
253.00	mir-342	Homo sapiens	30	194	30	194	11	53	11	53	4	6	253
251.00	mir-135b	Homo sapiens	184	249	184	249	0	1	0	1	1	1	251
247.00	mir-106b	Homo sapiens	0	13	0	13	54	194	54	194	36	40	247
233.00	mir-9-1	Homo sapiens	46	197	0	0	1	6	0	0	27	30	233
232.00	mir-9-2	Homo sapiens	46	200	0	0	1	4	0	0	26	28	232
227.00	mir-9-3	Homo sapiens	46	194	0	0	1	5	0	0	26	28	227
213.00	mir-328	Homo sapiens	0	0	0	0	134	212	134	212	1	1	213
208.00	mir-16-2	Homo sapiens	19	101	0	0	4	104	4	104	3	3	208
198.00	mir-140	Homo sapiens	15	30	15	30	23	124	23	124	18	44	198
189.00	mir-24-1	Homo sapiens	4	23	4	23	0	165	0	5	1	1	189
182.00	mir-8086	Homo sapiens	0	0	0	0	0	0	0	0	9	182	182
178.00	mir-96	Homo sapiens	151	178	151	178	0	0	0	0	0	0	178
178.00	mir-3159	Homo sapiens	0	1	0	1	0	0	0	0	32	177	178
175.00	mir-574	Homo sapiens	0	1	0	1	97	128	97	128	37	46	175
168.00	mir-345	Homo sapiens	70	161	70	161	0	0	0	0	6	7	168
164.00	mir-218-2	Homo sapiens	95	162	0	0	0	0	0	0	0	2	164
162.00	mir-218-1	Homo sapiens	94	159	0	0	0	0	0	0	2	3	162
162.00	mir-149	Homo sapiens	21	129	21	129	0	2	0	2	26	31	162
158.00	mir-103b-1	Homo sapiens	102	156	0	0	0	0	0	0	2	2	158
155.00	mir-10395	Homo sapiens	0	0	0	0	56	154	56	154	1	1	155
154.00	mir-103b-2	Homo sapiens	102	151	0	0	0	0	0	0	2	3	154
137.00	mir-23a	Homo sapiens	0	4	0	4	0	130	0	130	0	3	137
136.00	mir-32	Homo sapiens	76	123	76	123	0	13	0	13	0	0	136
133.00	mir-582	Homo sapiens	0	0	0	0	86	133	86	133	0	0	133
131.00	mir-320b-1	Homo sapiens	0	0	0	0	0	130	0	0	0	1	131
130.00	mir-425	Homo sapiens	3	121	3	121	0	4	0	4	5	5	130
127.00	mir-320b-2	Homo sapiens	0	0	0	0	0	126	0	0	0	1	127
122.00	mir-142	Homo sapiens	6	21	6	21	14	25	14	25	62	76	122
119.00	mir-3615	Homo sapiens	0	0	0	0	1	112	1	112	1	7	119
116.00	mir-769	Homo sapiens	50	115	50	115	0	1	0	1	0	0	116
111.00	mir-1285-1	Homo sapiens	0	0	0	0	0	3	0	0	14	108	111
110.00	mir-132	Homo sapiens	7	45	7	45	8	50	8	50	14	15	110
109.00	mir-181b-1	Homo sapiens	13	52	0	0	0	1	0	1	49	56	109
109.00	mir-708	Homo sapiens	5	12	5	12	1	87	1	87	7	10	109
107.00	mir-181b-2	Homo sapiens	14	57	0	0	0	0	0	0	48	50	107
103.00	mir-16-1	Homo sapiens	20	102	0	1	0	0	0	0	1	1	103
103.00	mir-143	Homo sapiens	0	0	0	0	71	103	71	103	0	0	103
98.00	mir-95	Homo sapiens	0	0	0	0	2	98	2	98	0	0	98
95.00	mir-1843	Homo sapiens	2	77	2	77	0	0	0	0	0	18	95
92.00	mir-339	Homo sapiens	9	25	9	25	1	64	1	64	2	3	92
89.00	mir-210	Homo sapiens	0	0	0	0	3	79	3	79	2	10	89
87.00	mir-451a	Homo sapiens	0	87	0	87	0	0	0	0	0	0	87
87.00	mir-628	Homo sapiens	12	36	12	36	14	49	14	49	0	2	87
84.00	mir-7-1	Homo sapiens	58	77	0	2	3	3	3	3	4	4	84
83.00	mir-619	Homo sapiens	0	40	0	40	0	0	0	0	5	43	83
81.00	mir-7-3	Homo sapiens	59	79	0	0	0	0	0	0	2	2	81
79.00	mir-7-2	Homo sapiens	59	76	0	1	0	0	0	0	3	3	79
76.00	mir-223	Homo sapiens	0	8	0	8	12	67	12	67	1	1	76
73.00	mir-374a	Homo sapiens	12	56	12	56	10	14	10	14	2	3	73
73.00	mir-4446	Homo sapiens	0	0	0	0	23	67	23	67	3	6	73
72.00	mir-30b	Homo sapiens	24	64	24	64	3	7	3	7	0	1	72
72.00	mir-7706	Homo sapiens	0	0	0	0	8	63	8	63	7	9	72
69.00	mir-1301	Homo sapiens	0	0	0	0	5	37	5	37	22	32	69
69.00	mir-1269a	Homo sapiens	0	0	0	0	13	68	13	68	1	1	69
68.00	mir-671	Homo sapiens	0	6	0	6	10	57	10	57	2	5	68
67.00	mir-874	Homo sapiens	0	0	0	0	4	67	4	67	0	0	67
67.00	mir-378i	Homo sapiens	0	66	0	65	0	0	0	0	0	1	67
65.00	mir-10a	Homo sapiens	2	63	2	63	0	0	0	0	2	2	65
64.00	mir-1290	Homo sapiens	0	0	0	0	0	61	0	61	0	3	64
63.00	mir-7851	Homo sapiens	0	0	0	0	0	0	0	0	2	63	63
62.00	mir-185	Homo sapiens	1	55	1	55	0	7	0	7	0	0	62
60.00	mir-29c	Homo sapiens	0	19	0	19	5	28	5	27	10	13	60
59.00	mir-652	Homo sapiens	0	0	0	0	21	58	21	58	1	1	59
58.00	mir-204	Homo sapiens	24	57	24	57	0	1	0	1	0	0	58
56.00	mir-363	Homo sapiens	0	0	0	0	45	55	45	55	1	1	56
56.00	mir-1273h	Homo sapiens	0	0	0	0	0	0	0	0	4	56	56
53.00	mir-484	Homo sapiens	22	50	22	50	0	0	0	0	2	3	53
48.00	mir-3135b	Homo sapiens	0	17	0	17	0	0	0	0	1	31	48
45.00	mir-29b-2	Homo sapiens	0	1	0	1	6	25	0	0	16	19	45
45.00	mir-452	Homo sapiens	2	22	2	22	0	0	0	0	20	23	45
45.00	mir-941-2	Homo sapiens	0	0	0	0	24	44	0	0	0	1	45
44.00	mir-20a	Homo sapiens	27	44	27	43	0	0	0	0	0	0	44
44.00	mir-29b-1	Homo sapiens	0	0	0	0	6	25	0	0	16	19	44
44.00	mir-501	Homo sapiens	0	2	0	2	13	42	13	42	0	0	44
43.00	mir-486-2	Homo sapiens	11	43	0	4	0	0	0	0	0	0	43
42.00	mir-629	Homo sapiens	27	42	27	42	0	0	0	0	0	0	42
42.00	mir-941-4	Homo sapiens	0	0	0	0	24	41	0	0	0	1	42
41.00	mir-455	Homo sapiens	2	39	2	39	0	1	0	1	0	1	41
40.00	mir-4485	Homo sapiens	0	0	0	0	0	18	0	18	9	22	40
40.00	mir-5684	Homo sapiens	0	0	0	0	0	0	0	0	0	40	40
39.00	mir-486-1	Homo sapiens	11	39	0	4	0	0	0	0	0	0	39
39.00	mir-3929	Homo sapiens	0	0	0	0	0	0	0	0	4	39	39
39.00	mir-12136	Homo sapiens	0	2	0	2	0	0	0	0	23	37	39
38.00	mir-6842	Homo sapiens	3	3	3	3	18	35	18	35	0	0	38
37.00	mir-335	Homo sapiens	0	7	0	7	17	30	17	30	0	0	37
36.00	mir-941-1	Homo sapiens	0	0	0	0	23	36	0	0	0	0	36
36.00	mir-4430	Homo sapiens	0	0	0	0	0	0	0	0	0	36	36
35.00	mir-34a	Homo sapiens	11	30	11	30	0	0	0	0	1	5	35
35.00	mir-642b	Homo sapiens	23	35	23	35	0	0	0	0	0	0	35
34.00	mir-330	Homo sapiens	0	17	0	17	2	17	2	17	0	0	34
34.00	mir-941-3	Homo sapiens	0	0	0	0	23	34	0	0	0	0	34
33.00	mir-511	Homo sapiens	22	32	22	32	0	0	0	0	1	1	33
33.00	mir-499a	Homo sapiens	8	33	8	33	0	0	0	0	0	0	33
32.00	mir-941-5	Homo sapiens	0	0	0	0	24	32	0	0	0	0	32
31.00	mir-449b	Homo sapiens	2	19	2	11	4	10	4	10	0	2	31
31.00	mir-374b	Homo sapiens	10	29	10	29	0	2	0	2	0	0	31
31.00	mir-3665	Homo sapiens	0	0	0	0	0	0	0	0	1	31	31
30.00	mir-15b	Homo sapiens	9	20	9	20	0	6	0	6	4	4	30
30.00	mir-194-2	Homo sapiens	1	30	0	0	0	0	0	0	0	0	30
30.00	mir-1287	Homo sapiens	14	30	14	30	0	0	0	0	0	0	30
30.00	mir-9985	Homo sapiens	0	29	0	29	0	0	0	0	0	1	30
29.00	mir-651	Homo sapiens	7	29	7	29	0	0	0	0	0	0	29
29.00	mir-660	Homo sapiens	6	29	6	29	0	0	0	0	0	0	29
28.00	mir-31	Homo sapiens	0	27	0	27	0	1	0	1	0	0	28
28.00	mir-1303	Homo sapiens	0	0	0	0	6	20	6	20	1	8	28
27.00	mir-194-1	Homo sapiens	0	26	0	0	0	0	0	0	1	1	27
27.00	mir-181d	Homo sapiens	8	22	8	22	0	0	0	0	5	5	27
27.00	mir-625	Homo sapiens	2	23	2	23	0	4	0	4	0	0	27
26.00	mir-126	Homo sapiens	0	0	0	0	7	26	7	26	0	0	26
26.00	mir-3648-2	Homo sapiens	0	0	0	0	0	0	0	0	21	26	26
25.00	mir-760	Homo sapiens	0	0	0	0	2	25	2	25	0	0	25
25.00	mir-3648-1	Homo sapiens	0	0	0	0	0	0	0	0	20	25	25
24.00	mir-589	Homo sapiens	0	24	0	24	0	0	0	0	0	0	24
23.00	mir-150	Homo sapiens	13	22	13	22	0	1	0	1	0	0	23
23.00	mir-320c-2	Homo sapiens	0	0	0	0	4	23	0	0	0	0	23
23.00	mir-7110	Homo sapiens	0	0	0	0	0	0	0	0	2	23	23
22.00	mir-421	Homo sapiens	0	0	0	0	2	22	2	22	0	0	22
22.00	mir-320c-1	Homo sapiens	0	0	0	0	3	22	0	0	0	0	22
21.00	mir-193a	Homo sapiens	6	18	6	18	0	0	0	0	2	3	21
19.00	mir-4472-2	Homo sapiens	0	0	0	0	0	0	0	0	2	19	19
18.00	mir-1285-2	Homo sapiens	0	0	0	0	0	3	0	0	0	15	18
18.00	mir-3177	Homo sapiens	0	0	0	0	6	17	6	17	0	1	18
16.00	mir-338	Homo sapiens	0	14	0	14	0	2	0	2	0	0	16
16.00	mir-378d-2	Homo sapiens	0	16	0	16	0	0	0	0	0	0	16
16.00	mir-1299	Homo sapiens	0	0	0	0	0	7	0	7	7	9	16
16.00	mir-3613	Homo sapiens	10	15	10	15	0	1	0	1	0	0	16
15.00	mir-331	Homo sapiens	0	12	0	12	0	3	0	3	0	0	15
15.00	mir-422a	Homo sapiens	0	15	0	15	0	0	0	0	0	0	15
15.00	mir-502	Homo sapiens	0	0	0	0	6	15	6	14	0	0	15
15.00	mir-6516	Homo sapiens	0	11	0	11	3	4	3	4	0	0	15
14.00	mir-197	Homo sapiens	0	0	0	0	8	14	8	14	0	0	14
14.00	mir-199b	Homo sapiens	0	7	0	7	0	6	0	0	0	1	14
14.00	mir-195	Homo sapiens	4	7	4	7	2	7	2	7	0	0	14
14.00	mir-147b	Homo sapiens	0	0	0	0	0	14	0	14	0	0	14
14.00	mir-1260a	Homo sapiens	0	12	0	12	0	0	0	0	0	2	14
14.00	mir-7704	Homo sapiens	0	14	0	14	0	0	0	0	0	0	14
13.00	mir-493	Homo sapiens	2	2	2	2	6	11	6	11	0	0	13
13.00	mir-548o	Homo sapiens	0	0	0	0	11	13	0	0	0	0	13
13.00	mir-1268a	Homo sapiens	0	2	0	2	0	0	0	0	0	11	13
13.00	mir-1306	Homo sapiens	0	0	0	0	0	5	0	5	2	8	13
13.00	mir-378c	Homo sapiens	0	4	0	4	0	0	0	0	8	9	13
13.00	mir-10399	Homo sapiens	0	1	0	1	0	8	0	8	4	4	13
12.00	mir-155	Homo sapiens	0	12	0	12	0	0	0	0	0	0	12
12.00	mir-381	Homo sapiens	0	0	0	0	10	12	10	12	0	0	12
12.00	mir-193b	Homo sapiens	3	10	3	10	0	1	0	1	1	1	12
12.00	mir-3158-1	Homo sapiens	0	11	0	0	0	1	0	0	0	0	12
12.00	mir-3909	Homo sapiens	0	0	0	0	4	10	4	10	2	2	12
12.00	mir-548o-2	Homo sapiens	0	0	0	0	11	12	0	0	0	0	12
12.00	mir-4516	Homo sapiens	0	11	0	11	0	0	0	0	0	1	12
12.00	mir-4662a	Homo sapiens	4	12	4	12	0	0	0	0	0	0	12
12.00	mir-6843	Homo sapiens	0	0	0	0	5	12	5	12	0	0	12
11.00	mir-103a-2	Homo sapiens	0	0	0	0	0	9	0	7	2	2	11
11.00	mir-4488	Homo sapiens	0	11	0	11	0	0	0	0	0	0	11
10.00	mir-19a	Homo sapiens	0	0	0	0	0	10	0	10	0	0	10
10.00	mir-181c	Homo sapiens	4	9	4	9	0	1	0	1	0	0	10
10.00	mir-188	Homo sapiens	7	10	7	10	0	0	0	0	0	0	10
10.00	mir-379	Homo sapiens	8	9	8	9	0	1	0	1	0	0	10
10.00	mir-409	Homo sapiens	0	0	0	0	6	10	6	10	0	0	10
10.00	mir-432	Homo sapiens	4	10	4	10	0	0	0	0	0	0	10
10.00	mir-500a	Homo sapiens	0	0	0	0	3	10	3	10	0	0	10
10.00	mir-3135a	Homo sapiens	0	0	0	0	0	0	0	0	0	10	10
9.00	mir-130a	Homo sapiens	0	0	0	0	0	9	0	9	0	0	9
9.00	mir-324	Homo sapiens	1	2	1	2	0	1	0	1	1	6	9
9.00	mir-505	Homo sapiens	1	2	1	2	0	4	0	4	2	3	9
9.00	mir-514a-3	Homo sapiens	0	0	0	0	6	9	0	0	0	0	9
9.00	mir-509-3	Homo sapiens	1	8	1	8	0	0	0	0	1	1	9
9.00	mir-1295a	Homo sapiens	0	0	0	0	2	9	2	9	0	0	9
9.00	mir-1273c	Homo sapiens	0	0	0	0	0	0	0	0	2	9	9
9.00	mir-3158-2	Homo sapiens	0	9	0	0	0	0	0	0	0	0	9
9.00	mir-676	Homo sapiens	0	2	0	2	0	7	0	7	0	0	9
9.00	mir-4473	Homo sapiens	0	0	0	0	0	9	0	9	0	0	9
9.00	mir-4661	Homo sapiens	1	8	1	8	0	0	0	0	0	1	9
9.00	mir-10396b	Homo sapiens	3	5	3	5	0	0	0	0	4	4	9
8.00	mir-15a	Homo sapiens	0	6	0	6	0	0	0	0	1	2	8
8.00	mir-370	Homo sapiens	0	0	0	0	4	8	4	8	0	0	8
8.00	mir-514a-1	Homo sapiens	0	0	0	0	6	8	0	0	0	0	8
8.00	mir-514a-2	Homo sapiens	0	0	0	0	6	8	0	0	0	0	8
8.00	mir-934	Homo sapiens	0	7	0	7	0	0	0	0	1	1	8
8.00	mir-1248	Homo sapiens	0	0	0	0	0	0	0	0	6	8	8
8.00	mir-5689	Homo sapiens	0	0	0	0	0	0	0	0	0	8	8
7.00	mir-199a-2	Homo sapiens	0	1	0	0	0	5	0	0	0	1	7
7.00	mir-424	Homo sapiens	0	1	0	1	1	6	1	6	0	0	7
7.00	mir-597	Homo sapiens	0	0	0	0	0	0	0	0	7	7	7
7.00	mir-1291	Homo sapiens	0	1	0	1	0	0	0	0	6	6	7
7.00	mir-1304	Homo sapiens	0	0	0	0	0	0	0	0	0	7	7
7.00	mir-320d-1	Homo sapiens	0	0	0	0	4	7	0	2	0	0	7
7.00	mir-320d-2	Homo sapiens	0	0	0	0	4	5	0	1	0	2	7
7.00	mir-378f	Homo sapiens	0	0	0	0	0	2	0	2	0	5	7
7.00	mir-4449	Homo sapiens	0	0	0	0	0	3	0	3	4	4	7
7.00	mir-548az	Homo sapiens	0	7	0	7	0	0	0	0	0	0	7
7.00	mir-6866	Homo sapiens	2	7	2	7	0	0	0	0	0	0	7
6.00	mir-19b-1	Homo sapiens	0	0	0	0	1	6	0	0	0	0	6
6.00	mir-139	Homo sapiens	2	6	2	6	0	0	0	0	0	0	6
6.00	mir-203a	Homo sapiens	0	0	0	0	0	4	0	4	0	2	6
6.00	mir-136	Homo sapiens	0	0	0	0	4	5	4	5	1	1	6
6.00	mir-130b	Homo sapiens	0	2	0	2	0	4	0	4	0	0	6
6.00	mir-411	Homo sapiens	0	0	0	0	0	6	0	6	0	0	6
6.00	mir-543	Homo sapiens	0	0	0	0	5	6	5	6	0	0	6
6.00	mir-548e	Homo sapiens	0	0	0	0	0	6	0	6	0	0	6
6.00	mir-3605	Homo sapiens	0	0	0	0	0	3	0	3	2	3	6
6.00	mir-4508	Homo sapiens	0	6	0	6	0	0	0	0	0	0	6
6.00	mir-4510	Homo sapiens	0	6	0	0	0	0	0	0	0	0	6
6.00	mir-4664	Homo sapiens	0	0	0	0	1	6	1	6	0	0	6
6.00	mir-6821	Homo sapiens	0	5	0	5	0	0	0	0	1	1	6
5.00	mir-19b-2	Homo sapiens	0	0	0	0	0	5	0	0	0	0	5
5.00	mir-103a-1	Homo sapiens	0	0	0	0	0	2	0	0	2	3	5
5.00	mir-215	Homo sapiens	0	5	0	5	0	0	0	0	0	0	5
5.00	mir-134	Homo sapiens	1	5	1	5	0	0	0	0	0	0	5
5.00	mir-654	Homo sapiens	0	0	0	0	0	5	0	5	0	0	5
5.00	mir-1468	Homo sapiens	1	5	1	5	0	0	0	0	0	0	5
5.00	mir-877	Homo sapiens	1	3	1	3	0	0	0	0	0	2	5
5.00	mir-937	Homo sapiens	0	0	0	0	0	5	0	5	0	0	5
5.00	mir-942	Homo sapiens	1	3	1	3	0	0	0	0	1	2	5
5.00	mir-944	Homo sapiens	0	0	0	0	0	5	0	5	0	0	5
5.00	mir-1278	Homo sapiens	0	0	0	0	3	5	3	5	0	0	5
5.00	mir-1292	Homo sapiens	0	1	0	1	0	0	0	0	4	4	5
5.00	mir-3065	Homo sapiens	0	0	0	0	0	5	0	5	0	0	5
5.00	mir-3195	Homo sapiens	0	0	0	0	0	0	0	0	0	5	5
5.00	mir-3911	Homo sapiens	2	4	2	4	0	0	0	0	1	1	5
5.00	mir-4467	Homo sapiens	3	5	3	5	0	0	0	0	0	0	5
5.00	mir-3064	Homo sapiens	0	4	0	4	0	0	0	0	1	1	5
5.00	mir-6131	Homo sapiens	0	0	0	0	0	5	0	5	0	0	5
5.00	mir-6736	Homo sapiens	1	5	1	5	0	0	0	0	0	0	5
5.00	mir-6747	Homo sapiens	0	0	0	0	1	5	1	5	0	0	5
5.00	mir-10392	Homo sapiens	0	0	0	0	0	0	0	0	4	5	5
4.00	mir-199a-1	Homo sapiens	0	0	0	0	0	3	0	0	0	1	4
4.00	mir-211	Homo sapiens	4	4	4	4	0	0	0	0	0	0	4
4.00	mir-153-1	Homo sapiens	0	0	0	0	3	4	0	0	0	0	4
4.00	mir-153-2	Homo sapiens	0	0	0	0	3	4	0	0	0	0	4
4.00	mir-326	Homo sapiens	0	0	0	0	3	4	3	4	0	0	4
4.00	mir-504	Homo sapiens	1	1	1	1	0	3	0	3	0	0	4
4.00	mir-556	Homo sapiens	0	3	0	3	0	1	0	1	0	0	4
4.00	mir-659	Homo sapiens	4	4	4	4	0	0	0	0	0	0	4
4.00	mir-1296	Homo sapiens	3	4	3	4	0	0	0	0	0	0	4
4.00	mir-1266	Homo sapiens	2	4	2	4	0	0	0	0	0	0	4
4.00	mir-664a	Homo sapiens	0	4	0	4	0	0	0	0	0	0	4
4.00	mir-1908	Homo sapiens	1	4	1	4	0	0	0	0	0	0	4
4.00	mir-4284	Homo sapiens	0	0	0	0	0	0	0	0	0	4	4
4.00	mir-1268b	Homo sapiens	0	0	0	0	0	0	0	0	0	4	4
4.00	mir-4429	Homo sapiens	0	4	0	4	0	0	0	0	0	0	4
4.00	mir-4512	Homo sapiens	0	0	0	0	0	0	0	0	0	4	4
4.00	mir-3529	Homo sapiens	0	0	0	0	0	0	0	0	3	4	4
4.00	mir-4746	Homo sapiens	0	1	0	1	0	0	0	0	3	3	4
4.00	mir-664b	Homo sapiens	0	4	0	4	0	0	0	0	0	0	4
4.00	mir-5701-1	Homo sapiens	0	4	0	0	0	0	0	0	0	0	4
4.00	mir-6127	Homo sapiens	0	0	0	0	0	0	0	0	0	4	4
4.00	mir-6808	Homo sapiens	0	0	0	0	1	4	1	4	0	0	4
4.00	mir-6854	Homo sapiens	0	0	0	0	1	4	1	4	0	0	4
4.00	mir-8485	Homo sapiens	0	0	0	0	0	0	0	0	1	4	4
4.00	mir-5701-3	Homo sapiens	0	4	0	0	0	0	0	0	0	0	4
4.00	mir-9903	Homo sapiens	0	0	0	0	0	4	0	4	0	0	4
4.00	mir-10396a	Homo sapiens	2	2	2	2	0	0	0	0	1	2	4
3.00	mir-93	Homo sapiens	0	2	0	2	1	1	1	1	0	0	3
3.00	mir-107	Homo sapiens	0	0	0	0	0	0	0	0	2	3	3
3.00	mir-187	Homo sapiens	0	0	0	0	0	3	0	3	0	0	3
3.00	mir-219a-1	Homo sapiens	0	0	0	0	0	0	0	0	3	3	3
3.00	mir-127	Homo sapiens	0	0	0	0	0	3	0	3	0	0	3
3.00	mir-296	Homo sapiens	0	0	0	0	0	3	0	3	0	0	3
3.00	mir-382	Homo sapiens	1	3	1	3	0	0	0	0	0	0	3
3.00	mir-516b-2	Homo sapiens	2	3	0	1	0	0	0	0	0	0	3
3.00	mir-506	Homo sapiens	0	0	0	0	0	3	0	3	0	0	3
3.00	mir-618	Homo sapiens	3	3	3	3	0	0	0	0	0	0	3
3.00	mir-632	Homo sapiens	0	0	0	0	0	0	0	0	3	3	3
3.00	mir-1227	Homo sapiens	0	0	0	0	0	3	0	3	0	0	3
3.00	mir-1293	Homo sapiens	0	0	0	0	0	0	0	0	3	3	3
3.00	mir-1288	Homo sapiens	0	0	0	0	3	3	3	3	0	0	3
3.00	mir-1910	Homo sapiens	0	2	0	2	1	1	1	1	0	0	3
3.00	mir-1972-1	Homo sapiens	0	0	0	0	0	1	0	0	0	2	3
3.00	mir-3150a	Homo sapiens	0	3	0	3	0	0	0	0	0	0	3
3.00	mir-3157	Homo sapiens	0	0	0	0	3	3	3	3	0	0	3
3.00	mir-1260b	Homo sapiens	0	3	0	3	0	0	0	0	0	0	3
3.00	mir-3174	Homo sapiens	0	3	0	3	0	0	0	0	0	0	3
3.00	mir-3187	Homo sapiens	0	0	0	0	0	3	0	3	0	0	3
3.00	mir-500b	Homo sapiens	0	0	0	0	0	1	0	1	1	2	3
3.00	mir-3617	Homo sapiens	0	3	0	3	0	0	0	0	0	0	3
3.00	mir-3622a	Homo sapiens	0	3	0	3	0	0	0	0	0	0	3
3.00	mir-3679	Homo sapiens	0	0	0	0	0	0	0	0	3	3	3
3.00	mir-3913-1	Homo sapiens	0	3	0	0	0	0	0	0	0	0	3
3.00	mir-3918	Homo sapiens	1	3	1	3	0	0	0	0	0	0	3
3.00	mir-4423	Homo sapiens	0	2	0	2	0	1	0	1	0	0	3
3.00	mir-548aj-2	Homo sapiens	0	3	0	0	0	0	0	0	0	0	3
3.00	mir-4677	Homo sapiens	0	2	0	2	0	0	0	0	1	1	3
3.00	mir-1343	Homo sapiens	0	0	0	0	0	3	0	3	0	0	3
3.00	mir-5089	Homo sapiens	0	0	0	0	0	1	0	1	2	2	3
3.00	mir-5701-2	Homo sapiens	0	3	0	0	0	0	0	0	0	0	3
3.00	mir-6503	Homo sapiens	1	2	1	2	0	0	0	0	0	1	3
3.00	mir-6735	Homo sapiens	1	2	1	2	0	0	0	0	0	1	3
3.00	mir-6855	Homo sapiens	0	1	0	1	0	0	0	0	1	2	3
3.00	mir-6873	Homo sapiens	0	0	0	0	1	3	1	3	0	0	3
3.00	mir-6875	Homo sapiens	0	2	0	2	0	0	0	0	1	1	3
3.00	mir-7854	Homo sapiens	0	0	0	0	3	3	3	3	0	0	3
3.00	mir-10401	Homo sapiens	0	0	0	0	0	0	0	0	3	3	3
3.00	mir-9902-2	Homo sapiens	0	0	0	0	0	0	0	0	0	3	3
2.00	mir-17	Homo sapiens	0	2	0	2	0	0	0	0	0	0	2
2.00	mir-33a	Homo sapiens	0	2	0	2	0	0	0	0	0	0	2
2.00	mir-214	Homo sapiens	0	2	0	2	0	0	0	0	0	0	2
2.00	mir-365b	Homo sapiens	0	0	0	0	1	2	0	0	0	0	2
2.00	mir-369	Homo sapiens	0	2	0	2	0	0	0	0	0	0	2
2.00	mir-492	Homo sapiens	0	0	0	0	0	0	0	0	0	2	2
2.00	mir-494	Homo sapiens	0	0	0	0	1	2	1	2	0	0	2
2.00	mir-516b-1	Homo sapiens	1	2	0	1	0	0	0	0	0	0	2
2.00	mir-450a-2	Homo sapiens	0	2	0	0	0	0	0	0	0	0	2
2.00	mir-508	Homo sapiens	0	0	0	0	0	2	0	2	0	0	2
2.00	mir-561	Homo sapiens	0	2	0	2	0	0	0	0	0	0	2
2.00	mir-551b	Homo sapiens	0	2	0	2	0	0	0	0	0	0	2
2.00	mir-583	Homo sapiens	0	0	0	0	0	0	0	0	2	2	2
2.00	mir-550a-1	Homo sapiens	0	2	0	0	0	0	0	0	0	0	2
2.00	mir-590	Homo sapiens	0	0	0	0	2	2	2	2	0	0	2
2.00	mir-592	Homo sapiens	0	2	0	2	0	0	0	0	0	0	2
2.00	mir-616	Homo sapiens	0	0	0	0	1	2	1	2	0	0	2
2.00	mir-33b	Homo sapiens	0	0	0	0	0	2	0	2	0	0	2
2.00	mir-873	Homo sapiens	0	0	0	0	0	0	0	0	1	2	2
2.00	mir-1181	Homo sapiens	0	0	0	0	0	0	0	0	0	2	2
2.00	mir-663b	Homo sapiens	0	0	0	0	1	2	1	2	0	0	2
2.00	mir-548j	Homo sapiens	1	1	1	1	0	1	0	1	0	0	2
2.00	mir-1289-1	Homo sapiens	0	0	0	0	0	0	0	0	1	2	2
2.00	mir-548f-1	Homo sapiens	0	1	0	1	0	1	0	0	0	0	2
2.00	mir-548f-2	Homo sapiens	0	0	0	0	0	2	0	0	0	0	2
2.00	mir-1277	Homo sapiens	0	0	0	0	0	0	0	0	2	2	2
2.00	mir-548i-1	Homo sapiens	1	2	0	0	0	0	0	0	0	0	2
2.00	mir-2277	Homo sapiens	1	1	1	1	0	0	0	0	1	1	2
2.00	mir-3127	Homo sapiens	0	0	0	0	0	2	0	2	0	0	2
2.00	mir-378b	Homo sapiens	0	0	0	0	0	1	0	1	0	1	2
2.00	mir-3194	Homo sapiens	0	0	0	0	0	0	0	0	2	2	2
2.00	mir-3199-2	Homo sapiens	0	0	0	0	0	0	0	0	2	2	2
2.00	mir-3180-5	Homo sapiens	0	2	0	0	0	0	0	0	0	0	2
2.00	mir-3913-2	Homo sapiens	0	2	0	0	0	0	0	0	0	0	2
2.00	mir-3934	Homo sapiens	0	2	0	2	0	0	0	0	0	0	2
2.00	mir-3944	Homo sapiens	1	2	1	2	0	0	0	0	0	0	2
2.00	mir-378d-1	Homo sapiens	0	0	0	0	0	1	0	1	0	1	2
2.00	mir-378g	Homo sapiens	0	2	0	2	0	0	0	0	0	0	2
2.00	mir-4440	Homo sapiens	0	0	0	0	0	2	0	2	0	0	2
2.00	mir-4448	Homo sapiens	0	0	0	0	0	2	0	2	0	0	2
2.00	mir-4454	Homo sapiens	0	1	0	1	0	0	0	0	0	1	2
2.00	mir-4470	Homo sapiens	0	0	0	0	0	0	0	0	2	2	2
2.00	mir-4522	Homo sapiens	0	0	0	0	0	0	0	0	1	2	2
2.00	mir-4529	Homo sapiens	0	2	0	2	0	0	0	0	0	0	2
2.00	mir-4539	Homo sapiens	0	0	0	0	0	0	0	0	0	2	2
2.00	mir-4654	Homo sapiens	0	0	0	0	0	0	0	0	1	2	2
2.00	mir-4687	Homo sapiens	0	0	0	0	0	2	0	2	0	0	2
2.00	mir-4745	Homo sapiens	0	1	0	1	0	0	0	0	1	1	2
2.00	mir-4753	Homo sapiens	0	0	0	0	0	2	0	2	0	0	2
2.00	mir-4776-2	Homo sapiens	1	1	0	0	0	0	0	0	1	1	2
2.00	mir-5009	Homo sapiens	0	2	0	2	0	0	0	0	0	0	2
2.00	mir-5585	Homo sapiens	0	0	0	0	0	1	0	1	0	1	2
2.00	mir-6515	Homo sapiens	2	2	2	2	0	0	0	0	0	0	2
2.00	mir-6744	Homo sapiens	0	2	0	2	0	0	0	0	0	0	2
2.00	mir-6795	Homo sapiens	0	0	0	0	0	0	0	0	2	2	2
2.00	mir-6868	Homo sapiens	0	0	0	0	0	2	0	2	0	0	2
2.00	mir-6877	Homo sapiens	0	2	0	2	0	0	0	0	0	0	2
2.00	mir-7111	Homo sapiens	0	0	0	0	0	2	0	2	0	0	2
2.00	mir-6511a-4	Homo sapiens	1	1	0	0	0	1	0	0	0	0	2
2.00	mir-9902-1	Homo sapiens	0	0	0	0	0	0	0	0	0	2	2
2.00	mir-10394	Homo sapiens	0	2	0	2	0	0	0	0	0	0	2
1.00	mir-106a	Homo sapiens	0	1	0	0	0	0	0	0	0	0	1
1.00	mir-129-1	Homo sapiens	1	1	0	0	0	0	0	0	0	0	1
1.00	mir-212	Homo sapiens	0	1	0	1	0	0	0	0	0	0	1
1.00	mir-135a-2	Homo sapiens	0	1	0	0	0	0	0	0	0	0	1
1.00	mir-145	Homo sapiens	0	0	0	0	0	1	0	1	0	0	1
1.00	mir-129-2	Homo sapiens	1	1	0	0	0	0	0	0	0	0	1
1.00	mir-301a	Homo sapiens	0	1	0	1	0	0	0	0	0	0	1
1.00	mir-362	Homo sapiens	0	0	0	0	1	1	1	1	0	0	1
1.00	mir-365a	Homo sapiens	0	0	0	0	0	1	0	0	0	0	1
1.00	mir-196b	Homo sapiens	0	1	0	1	0	0	0	0	0	0	1
1.00	mir-412	Homo sapiens	0	0	0	0	0	0	0	0	1	1	1
1.00	mir-485	Homo sapiens	0	0	0	0	0	0	0	0	0	1	1
1.00	mir-539	Homo sapiens	0	0	0	0	1	1	1	1	0	0	1
1.00	mir-576	Homo sapiens	0	0	0	0	1	1	1	1	0	0	1
1.00	mir-584	Homo sapiens	0	1	0	1	0	0	0	0	0	0	1
1.00	mir-548b	Homo sapiens	0	1	0	1	0	0	0	0	0	0	1
1.00	mir-598	Homo sapiens	0	0	0	0	0	1	0	1	0	0	1
1.00	mir-548a-3	Homo sapiens	0	0	0	0	0	1	0	0	0	0	1
1.00	mir-627	Homo sapiens	0	0	0	0	0	1	0	1	0	0	1
1.00	mir-643	Homo sapiens	0	0	0	0	0	0	0	0	1	1	1
1.00	mir-663a	Homo sapiens	0	0	0	0	0	0	0	0	1	1	1
1.00	mir-1271	Homo sapiens	0	1	0	1	0	0	0	0	0	0	1
1.00	mir-454	Homo sapiens	0	0	0	0	0	1	0	1	0	0	1
1.00	mir-766	Homo sapiens	0	0	0	0	1	1	1	1	0	0	1
1.00	mir-2113	Homo sapiens	0	0	0	0	0	1	0	1	0	0	1
1.00	mir-1225	Homo sapiens	0	1	0	1	0	0	0	0	0	0	1
1.00	mir-1237	Homo sapiens	0	0	0	0	0	1	0	1	0	0	1
1.00	mir-1302-4	Homo sapiens	0	0	0	0	0	0	0	0	0	1	1
1.00	mir-548g	Homo sapiens	0	1	0	0	0	0	0	0	0	0	1
1.00	mir-1262	Homo sapiens	1	1	1	1	0	0	0	0	0	0	1
1.00	mir-548h-2	Homo sapiens	0	1	0	0	0	0	0	0	0	0	1
1.00	mir-548i-3	Homo sapiens	0	1	0	0	0	0	0	0	0	0	1
1.00	mir-1282	Homo sapiens	0	0	0	0	0	0	0	0	0	1	1
1.00	mir-513c	Homo sapiens	0	0	0	0	0	0	0	0	1	1	1
1.00	mir-1538	Homo sapiens	0	0	0	0	0	0	0	0	1	1	1
1.00	mir-1913	Homo sapiens	0	0	0	0	0	0	0	0	1	1	1
1.00	mir-1976	Homo sapiens	0	0	0	0	0	1	0	1	0	0	1
1.00	mir-2115	Homo sapiens	1	1	1	1	0	0	0	0	0	0	1
1.00	mir-548q	Homo sapiens	0	0	0	0	0	0	0	0	1	1	1
1.00	mir-2861	Homo sapiens	0	0	0	0	0	0	0	0	0	1	1
1.00	mir-3115	Homo sapiens	1	1	1	1	0	0	0	0	0	0	1
1.00	mir-3118-1	Homo sapiens	0	0	0	0	0	1	0	0	0	0	1
1.00	mir-3120	Homo sapiens	0	1	0	1	0	0	0	0	0	0	1
1.00	mir-3121	Homo sapiens	0	0	0	0	1	1	1	1	0	0	1
1.00	mir-3125	Homo sapiens	0	0	0	0	0	0	0	0	0	1	1
1.00	mir-3129	Homo sapiens	0	0	0	0	0	1	0	1	0	0	1
1.00	mir-3134	Homo sapiens	0	0	0	0	1	1	1	1	0	0	1
1.00	mir-548u	Homo sapiens	0	0	0	0	0	1	0	1	0	0	1
1.00	mir-3173	Homo sapiens	0	0	0	0	0	1	0	1	0	0	1
1.00	mir-3179-2	Homo sapiens	0	0	0	0	0	1	0	0	0	0	1
1.00	mir-320e	Homo sapiens	0	0	0	0	0	1	0	1	0	0	1
1.00	mir-3191	Homo sapiens	0	0	0	0	0	1	0	1	0	0	1
1.00	mir-3193	Homo sapiens	0	0	0	0	0	0	0	0	0	1	1
1.00	mir-548x	Homo sapiens	0	1	0	0	0	0	0	0	0	0	1
1.00	mir-3199-1	Homo sapiens	0	0	0	0	0	0	0	0	1	1	1
1.00	mir-3651	Homo sapiens	0	0	0	0	0	0	0	0	1	1	1
1.00	mir-3652	Homo sapiens	0	0	0	0	0	0	0	0	1	1	1
1.00	mir-3664	Homo sapiens	0	1	0	1	0	0	0	0	0	0	1
1.00	mir-3678	Homo sapiens	0	0	0	0	0	0	0	0	1	1	1
1.00	mir-3180-4	Homo sapiens	0	1	0	0	0	0	0	0	0	0	1
1.00	mir-3908	Homo sapiens	0	0	0	0	0	0	0	0	0	1	1
1.00	mir-3922	Homo sapiens	0	0	0	0	0	0	0	0	0	1	1
1.00	mir-3927	Homo sapiens	0	1	0	1	0	0	0	0	0	0	1
1.00	mir-3936	Homo sapiens	0	0	0	0	1	1	1	1	0	0	1
1.00	mir-548ad	Homo sapiens	0	1	0	0	0	0	0	0	0	0	1
1.00	mir-378h	Homo sapiens	0	1	0	1	0	0	0	0	0	0	1
1.00	mir-3155b	Homo sapiens	0	0	0	0	0	1	0	1	0	0	1
1.00	mir-548ak	Homo sapiens	0	0	0	0	0	0	0	0	0	1	1
1.00	mir-4496	Homo sapiens	0	0	0	0	0	0	0	0	0	1	1
1.00	mir-4498	Homo sapiens	0	1	0	1	0	0	0	0	0	0	1
1.00	mir-4520-1	Homo sapiens	0	0	0	0	0	1	0	1	0	0	1
1.00	mir-4521	Homo sapiens	0	0	0	0	0	0	0	0	1	1	1
1.00	mir-4525	Homo sapiens	0	1	0	1	0	0	0	0	0	0	1
1.00	mir-548am	Homo sapiens	0	1	0	0	0	0	0	0	0	0	1
1.00	mir-4536-1	Homo sapiens	0	1	0	0	0	0	0	0	0	0	1
1.00	mir-4648	Homo sapiens	0	0	0	0	0	0	0	0	0	1	1
1.00	mir-4652	Homo sapiens	0	1	0	1	0	0	0	0	0	0	1
1.00	mir-4679-2	Homo sapiens	0	1	0	0	0	0	0	0	0	0	1
1.00	mir-4680	Homo sapiens	0	1	0	1	0	0	0	0	0	0	1
1.00	mir-4682	Homo sapiens	0	1	0	1	0	0	0	0	0	0	1
1.00	mir-4689	Homo sapiens	0	1	0	1	0	0	0	0	0	0	1
1.00	mir-4700	Homo sapiens	0	0	0	0	0	0	0	0	0	1	1
1.00	mir-4706	Homo sapiens	0	0	0	0	0	0	0	0	1	1	1
1.00	mir-4757	Homo sapiens	0	0	0	0	0	0	0	0	1	1	1
1.00	mir-4773-1	Homo sapiens	0	0	0	0	0	1	0	0	0	0	1
1.00	mir-4798	Homo sapiens	1	1	1	1	0	0	0	0	0	0	1
1.00	mir-3688-2	Homo sapiens	0	1	0	0	0	0	0	0	0	0	1
1.00	mir-4999	Homo sapiens	1	1	1	1	0	0	0	0	0	0	1
1.00	mir-5006	Homo sapiens	0	1	0	1	0	0	0	0	0	0	1
1.00	mir-548ap	Homo sapiens	0	0	0	0	0	0	0	0	0	1	1
1.00	mir-5010	Homo sapiens	0	1	0	1	0	0	0	0	0	0	1
1.00	mir-5191	Homo sapiens	0	0	0	0	0	0	0	0	0	1	1
1.00	mir-5193	Homo sapiens	0	0	0	0	0	1	0	1	0	0	1
1.00	mir-1295b	Homo sapiens	0	0	0	0	0	1	0	1	0	0	1
1.00	mir-5588	Homo sapiens	0	0	0	0	0	0	0	0	0	1	1
1.00	mir-4536-2	Homo sapiens	0	1	0	0	0	0	0	0	0	0	1
1.00	mir-548aw	Homo sapiens	0	0	0	0	0	0	0	0	0	1	1
1.00	mir-5687	Homo sapiens	0	0	0	0	0	0	0	0	1	1	1
1.00	mir-5696	Homo sapiens	0	0	0	0	0	0	0	0	1	1	1
1.00	mir-6500	Homo sapiens	0	0	0	0	1	1	1	1	0	0	1
1.00	mir-6716	Homo sapiens	0	0	0	0	0	1	0	1	0	0	1
1.00	mir-6511b-1	Homo sapiens	0	1	0	0	0	0	0	0	0	0	1
1.00	mir-6724-1	Homo sapiens	0	1	0	0	0	0	0	0	0	0	1
1.00	mir-6726	Homo sapiens	0	0	0	0	0	0	0	0	0	1	1
1.00	mir-6734	Homo sapiens	0	1	0	1	0	0	0	0	0	0	1
1.00	mir-6741	Homo sapiens	0	1	0	1	0	0	0	0	0	0	1
1.00	mir-6752	Homo sapiens	0	1	0	1	0	0	0	0	0	0	1
1.00	mir-6780a	Homo sapiens	0	1	0	1	0	0	0	0	0	0	1
1.00	mir-6786	Homo sapiens	0	0	0	0	0	0	0	0	1	1	1
1.00	mir-6787	Homo sapiens	0	1	0	1	0	0	0	0	0	0	1
1.00	mir-6805	Homo sapiens	0	1	0	1	0	0	0	0	0	0	1
1.00	mir-6806	Homo sapiens	0	0	0	0	1	1	1	1	0	0	1
1.00	mir-6811	Homo sapiens	0	1	0	1	0	0	0	0	0	0	1
1.00	mir-6812	Homo sapiens	0	0	0	0	0	0	0	0	1	1	1
1.00	mir-6815	Homo sapiens	0	0	0	0	0	0	0	0	1	1	1
1.00	mir-6837	Homo sapiens	0	0	0	0	1	1	1	1	0	0	1
1.00	mir-6882	Homo sapiens	1	1	1	1	0	0	0	0	0	0	1
1.00	mir-6885	Homo sapiens	0	0	0	0	0	1	0	1	0	0	1
1.00	mir-7108	Homo sapiens	0	0	0	0	0	0	0	0	0	1	1
1.00	mir-6511a-3	Homo sapiens	0	0	0	0	0	1	0	0	0	0	1
1.00	mir-7846	Homo sapiens	0	0	0	0	0	1	0	1	0	0	1
1.00	mir-7974	Homo sapiens	0	0	0	0	0	1	0	1	0	0	1
1.00	mir-6724-4	Homo sapiens	0	1	0	0	0	0	0	0	0	0	1
1.00	mir-6859-4	Homo sapiens	0	1	0	0	0	0	0	0	0	0	1
1.00	mir-12135	Homo sapiens	0	0	0	0	0	0	0	0	0	1	1
0.00	mir-450a-1	Homo sapiens	0	0	0	0	0	0	0	0	0	0	0
0.00	mir-548a-1	Homo sapiens	0	0	0	0	0	0	0	0	0	0	0
0.00	mir-548a-2	Homo sapiens	0	0	0	0	0	0	0	0	0	0	0
0.00	mir-550a-2	Homo sapiens	0	0	0	0	0	0	0	0	0	0	0
0.00	mir-548c	Homo sapiens	0	0	0	0	0	0	0	0	0	0	0
0.00	mir-548k	Homo sapiens	0	0	0	0	0	0	0	0	0	0	0
0.00	mir-548l	Homo sapiens	0	0	0	0	0	0	0	0	0	0	0
0.00	mir-548f-3	Homo sapiens	0	0	0	0	0	0	0	0	0	0	0
0.00	mir-548f-4	Homo sapiens	0	0	0	0	0	0	0	0	0	0	0
0.00	mir-548f-5	Homo sapiens	0	0	0	0	0	0	0	0	0	0	0
0.00	mir-548n	Homo sapiens	0	0	0	0	0	0	0	0	0	0	0
0.00	mir-548h-1	Homo sapiens	0	0	0	0	0	0	0	0	0	0	0
0.00	mir-548h-3	Homo sapiens	0	0	0	0	0	0	0	0	0	0	0
0.00	mir-548h-4	Homo sapiens	0	0	0	0	0	0	0	0	0	0	0
0.00	mir-548i-2	Homo sapiens	0	0	0	0	0	0	0	0	0	0	0
0.00	mir-548i-4	Homo sapiens	0	0	0	0	0	0	0	0	0	0	0
0.00	mir-3118-2	Homo sapiens	0	0	0	0	0	0	0	0	0	0	0
0.00	mir-3118-3	Homo sapiens	0	0	0	0	0	0	0	0	0	0	0
0.00	mir-3118-4	Homo sapiens	0	0	0	0	0	0	0	0	0	0	0
0.00	mir-3179-1	Homo sapiens	0	0	0	0	0	0	0	0	0	0	0
0.00	mir-3179-3	Homo sapiens	0	0	0	0	0	0	0	0	0	0	0
0.00	mir-1972-2	Homo sapiens	0	0	0	0	0	0	0	0	0	0	0
0.00	mir-3688-1	Homo sapiens	0	0	0	0	0	0	0	0	0	0	0
0.00	mir-548z	Homo sapiens	0	0	0	0	0	0	0	0	0	0	0
0.00	mir-548ae-2	Homo sapiens	0	0	0	0	0	0	0	0	0	0	0
0.00	mir-4679-1	Homo sapiens	0	0	0	0	0	0	0	0	0	0	0
0.00	mir-4773-2	Homo sapiens	0	0	0	0	0	0	0	0	0	0	0
0.00	mir-4776-1	Homo sapiens	0	0	0	0	0	0	0	0	0	0	0
0.00	mir-548au	Homo sapiens	0	0	0	0	0	0	0	0	0	0	0
0.00	mir-5708	Homo sapiens	0	0	0	0	0	0	0	0	0	0	0
0.00	mir-548ay	Homo sapiens	0	0	0	0	0	0	0	0	0	0	0
0.00	mir-6511a-1	Homo sapiens	0	0	0	0	0	0	0	0	0	0	0
0.00	mir-6859-1	Homo sapiens	0	0	0	0	0	0	0	0	0	0	0
0.00	mir-6511b-2	Homo sapiens	0	0	0	0	0	0	0	0	0	0	0
0.00	mir-6511a-2	Homo sapiens	0	0	0	0	0	0	0	0	0	0	0
0.00	mir-6859-2	Homo sapiens	0	0	0	0	0	0	0	0	0	0	0
0.00	mir-6859-3	Homo sapiens	0	0	0	0	0	0	0	0	0	0	0
0.00	mir-3179-4	Homo sapiens	0	0	0	0	0	0	0	0	0	0	0
0.00	mir-6724-2	Homo sapiens	0	0	0	0	0	0	0	0	0	0	0
0.00	mir-6724-3	Homo sapiens	0	0	0	0	0	0	0	0	0	0	0

## Sheet: 11A
Expression values	Name	Resource	Exact mature 5'	Mature 5'	Unique exact mature 5'	Unique mature 5'	Exact mature 3'	Mature 3'	Unique exact mature 3'	Unique mature 3'	Exact other	Other	Total
7,943.00	mir-148a	Homo sapiens	1	2	1	2	7068	7937	7068	7928	2	4	7943
2,758.00	mir-21	Homo sapiens	1168	2699	1168	2699	2	2	2	2	53	57	2758
2,648.00	mir-99a	Homo sapiens	12	2643	12	2639	0	0	0	0	4	5	2648
1,517.00	mir-1246	Homo sapiens	116	1516	116	1516	0	0	0	0	0	1	1517
1,452.00	mir-34c	Homo sapiens	332	1363	332	1363	7	15	7	15	70	74	1452
1,358.00	mir-27b	Homo sapiens	0	0	0	0	47	1355	47	1341	2	3	1358
1,144.00	mir-200a	Homo sapiens	15	44	15	44	1	1097	1	1095	3	3	1144
1,142.00	mir-375	Homo sapiens	0	0	0	0	352	1110	352	1110	31	32	1142
1,138.00	mir-200b	Homo sapiens	3	38	3	38	255	1094	255	1092	2	6	1138
1,050.00	mir-27a	Homo sapiens	0	0	0	0	6	1050	6	1034	0	0	1050
734.00	mir-200c	Homo sapiens	0	0	0	0	133	705	133	703	27	29	734
678.00	mir-151a	Homo sapiens	3	4	3	4	441	667	441	667	4	7	678
615.00	mir-3074	Homo sapiens	0	614	0	614	0	1	0	1	0	0	615
573.00	let-7b	Homo sapiens	127	475	127	475	0	1	0	1	89	97	573
553.00	mir-30d	Homo sapiens	49	508	49	508	0	0	0	0	39	45	553
382.00	mir-22	Homo sapiens	0	37	0	37	146	324	146	324	19	21	382
368.00	mir-92b	Homo sapiens	0	5	0	5	105	345	105	338	12	18	368
323.00	mir-146a	Homo sapiens	128	322	128	319	0	0	0	0	1	1	323
271.00	mir-423	Homo sapiens	47	97	47	97	70	152	70	152	21	22	271
264.00	let-7i	Homo sapiens	185	256	185	256	0	0	0	0	8	8	264
257.00	mir-429	Homo sapiens	0	0	0	0	121	255	121	255	2	2	257
202.00	let-7a-1	Homo sapiens	30	191	0	1	0	3	0	0	6	8	202
198.00	let-7a-3	Homo sapiens	31	187	0	0	0	3	0	0	7	8	198
196.00	let-7a-2	Homo sapiens	30	187	0	0	0	0	0	0	7	9	196
195.00	let-7g	Homo sapiens	25	192	25	192	0	0	0	0	2	3	195
187.00	let-7f-1	Homo sapiens	39	184	0	0	0	0	0	0	3	3	187
185.00	let-7f-2	Homo sapiens	39	182	0	7	0	0	0	0	3	3	185
167.00	mir-3960	Homo sapiens	0	0	0	0	0	6	0	6	0	161	167
164.00	mir-125a	Homo sapiens	2	146	2	146	0	3	0	3	12	15	164
157.00	mir-320a	Homo sapiens	0	0	0	0	61	155	61	148	0	2	157
137.00	mir-30a	Homo sapiens	22	109	22	109	5	15	5	15	12	13	137
126.00	mir-128-1	Homo sapiens	0	0	0	0	52	126	0	33	0	0	126
117.00	let-7c	Homo sapiens	59	108	59	107	0	0	0	0	9	9	117
106.00	mir-222	Homo sapiens	0	0	0	0	35	98	35	98	6	8	106
104.00	mir-25	Homo sapiens	1	2	1	2	62	102	62	102	0	0	104
102.00	mir-99b	Homo sapiens	10	96	10	96	2	5	2	5	1	1	102
100.00	mir-203b	Homo sapiens	0	100	0	100	0	0	0	0	0	0	100
95.00	mir-29a	Homo sapiens	0	0	0	0	6	84	6	84	9	11	95
95.00	mir-26a-2	Homo sapiens	61	93	0	0	0	0	0	0	2	2	95
93.00	mir-1180	Homo sapiens	0	0	0	0	57	92	57	92	1	1	93
92.00	mir-128-2	Homo sapiens	0	0	0	0	52	92	0	0	0	0	92
85.00	mir-26a-1	Homo sapiens	60	83	0	0	0	0	0	0	1	2	85
80.00	mir-378a	Homo sapiens	0	0	0	0	4	80	4	80	0	0	80
75.00	mir-30e	Homo sapiens	3	54	3	54	2	10	2	10	10	11	75
75.00	mir-8072	Homo sapiens	0	0	0	0	0	0	0	0	0	75	75
69.00	mir-34b	Homo sapiens	0	4	0	4	0	65	0	65	0	0	69
68.00	mir-143	Homo sapiens	0	0	0	0	51	64	51	64	0	4	68
66.00	mir-191	Homo sapiens	15	48	15	48	0	6	0	6	11	12	66
65.00	mir-205	Homo sapiens	9	65	9	65	0	0	0	0	0	0	65
61.00	mir-142	Homo sapiens	2	16	2	16	0	4	0	4	35	41	61
53.00	mir-141	Homo sapiens	0	3	0	3	0	43	0	42	6	7	53
53.00	mir-1290	Homo sapiens	0	0	0	0	0	53	0	53	0	0	53
48.00	mir-744	Homo sapiens	1	45	1	45	0	0	0	0	3	3	48
46.00	mir-100	Homo sapiens	0	46	0	42	0	0	0	0	0	0	46
46.00	mir-221	Homo sapiens	0	2	0	2	4	39	4	39	2	5	46
44.00	mir-186	Homo sapiens	17	44	17	44	0	0	0	0	0	0	44
43.00	let-7d	Homo sapiens	0	32	0	29	0	6	0	6	4	5	43
43.00	mir-183	Homo sapiens	14	43	14	43	0	0	0	0	0	0	43
42.00	mir-181a-1	Homo sapiens	2	37	0	0	0	0	0	0	4	5	42
42.00	mir-2110	Homo sapiens	5	34	5	34	0	0	0	0	1	8	42
41.00	mir-181a-2	Homo sapiens	1	36	0	0	0	1	0	1	4	4	41
40.00	mir-148b	Homo sapiens	0	0	0	0	13	39	13	27	1	1	40
40.00	mir-3184	Homo sapiens	0	20	0	20	0	0	0	0	20	20	40
39.00	mir-26b	Homo sapiens	16	39	16	39	0	0	0	0	0	0	39
38.00	mir-101-2	Homo sapiens	0	0	0	0	5	38	0	2	0	0	38
33.00	mir-92a-2	Homo sapiens	0	0	0	0	16	32	0	0	1	1	33
32.00	mir-224	Homo sapiens	0	25	0	25	0	0	0	0	7	7	32
32.00	mir-3159	Homo sapiens	0	0	0	0	0	0	0	0	9	32	32
32.00	mir-3615	Homo sapiens	0	0	0	0	0	32	0	32	0	0	32
31.00	mir-101-1	Homo sapiens	0	0	0	0	5	31	0	0	0	0	31
30.00	mir-182	Homo sapiens	1	13	1	13	0	0	0	0	15	17	30
29.00	mir-92a-1	Homo sapiens	0	0	0	0	15	29	0	1	0	0	29
29.00	mir-340	Homo sapiens	17	25	17	25	1	4	1	4	0	0	29
28.00	mir-449a	Homo sapiens	17	26	17	26	0	0	0	0	2	2	28
27.00	mir-16-2	Homo sapiens	2	11	0	0	0	14	0	14	2	2	27
27.00	mir-328	Homo sapiens	0	0	0	0	18	27	18	27	0	0	27
27.00	mir-8086	Homo sapiens	0	0	0	0	0	0	0	0	0	27	27
26.00	mir-125b-1	Homo sapiens	6	21	0	0	0	1	0	1	4	4	26
26.00	mir-146b	Homo sapiens	11	26	11	23	0	0	0	0	0	0	26
26.00	mir-1307	Homo sapiens	2	4	2	4	0	21	0	21	0	1	26
22.00	mir-28	Homo sapiens	0	5	0	5	5	17	5	17	0	0	22
22.00	mir-125b-2	Homo sapiens	6	18	0	0	0	1	0	1	3	3	22
22.00	mir-361	Homo sapiens	3	4	3	4	2	16	2	16	2	2	22
22.00	mir-532	Homo sapiens	19	22	19	22	0	0	0	0	0	0	22
21.00	mir-223	Homo sapiens	0	8	0	8	2	10	2	10	3	3	21
21.00	mir-449c	Homo sapiens	1	17	1	17	0	0	0	0	0	4	21
20.00	mir-24-2	Homo sapiens	0	8	0	8	0	12	0	0	0	0	20
20.00	mir-140	Homo sapiens	3	6	3	6	4	9	4	9	1	5	20
18.00	mir-190b	Homo sapiens	10	18	10	18	0	0	0	0	0	0	18
16.00	mir-23a	Homo sapiens	0	0	0	0	0	16	0	16	0	0	16
16.00	mir-192	Homo sapiens	2	8	2	8	0	0	0	0	6	8	16
16.00	mir-152	Homo sapiens	0	0	0	0	8	16	8	16	0	0	16
15.00	mir-132	Homo sapiens	0	8	0	8	0	3	0	3	2	4	15
15.00	mir-106b	Homo sapiens	0	0	0	0	4	8	4	8	6	7	15
15.00	mir-1285-1	Homo sapiens	0	0	0	0	0	0	0	0	0	15	15
15.00	mir-10400	Homo sapiens	0	15	0	15	0	0	0	0	0	0	15
14.00	mir-218-2	Homo sapiens	7	14	0	0	0	0	0	0	0	0	14
14.00	mir-619	Homo sapiens	0	4	0	4	0	0	0	0	2	10	14
13.00	mir-24-1	Homo sapiens	0	0	0	0	0	13	0	1	0	0	13
12.00	mir-181b-1	Homo sapiens	2	6	0	0	0	0	0	0	5	6	12
12.00	mir-218-1	Homo sapiens	8	12	0	0	0	0	0	0	0	0	12
12.00	mir-708	Homo sapiens	0	2	0	2	0	10	0	10	0	0	12
11.00	mir-32	Homo sapiens	2	8	2	8	0	3	0	3	0	0	11
10.00	let-7e	Homo sapiens	3	10	3	10	0	0	0	0	0	0	10
10.00	mir-451a	Homo sapiens	0	10	0	10	0	0	0	0	0	0	10
10.00	mir-452	Homo sapiens	1	1	1	1	0	0	0	0	8	9	10
10.00	mir-320b-1	Homo sapiens	0	0	0	0	0	10	0	0	0	0	10
9.00	mir-16-1	Homo sapiens	2	9	0	0	0	0	0	0	0	0	9
9.00	mir-23b	Homo sapiens	1	6	1	6	0	2	0	2	1	1	9
9.00	mir-149	Homo sapiens	0	3	0	3	0	0	0	0	5	6	9
9.00	mir-378i	Homo sapiens	0	9	0	9	0	0	0	0	0	0	9
8.00	mir-20a	Homo sapiens	7	8	7	8	0	0	0	0	0	0	8
8.00	mir-98	Homo sapiens	2	7	2	7	0	0	0	0	0	1	8
8.00	mir-184	Homo sapiens	0	0	0	0	3	5	3	5	3	3	8
8.00	mir-181b-2	Homo sapiens	2	4	0	0	0	0	0	0	3	4	8
8.00	mir-345	Homo sapiens	3	8	3	8	0	0	0	0	0	0	8
8.00	mir-628	Homo sapiens	0	2	0	2	3	6	3	6	0	0	8
8.00	mir-769	Homo sapiens	4	8	4	8	0	0	0	0	0	0	8
8.00	mir-103b-1	Homo sapiens	2	8	0	0	0	0	0	0	0	0	8
8.00	mir-3929	Homo sapiens	0	0	0	0	0	0	0	0	1	8	8
7.00	mir-185	Homo sapiens	1	7	1	7	0	0	0	0	0	0	7
7.00	mir-338	Homo sapiens	0	7	0	7	0	0	0	0	0	0	7
7.00	mir-339	Homo sapiens	0	1	0	1	0	6	0	6	0	0	7
7.00	mir-103b-2	Homo sapiens	2	6	0	0	0	0	0	0	1	1	7
7.00	mir-4430	Homo sapiens	0	0	0	0	0	0	0	0	0	7	7
7.00	mir-5588	Homo sapiens	0	0	0	0	0	0	0	0	0	7	7
6.00	mir-30c-2	Homo sapiens	2	3	0	0	0	1	0	1	2	2	6
6.00	mir-9-2	Homo sapiens	0	5	0	0	0	0	0	0	1	1	6
6.00	mir-9-3	Homo sapiens	1	3	0	0	0	1	0	0	2	2	6
6.00	mir-501	Homo sapiens	0	0	0	0	0	6	0	6	0	0	6
6.00	mir-320b-2	Homo sapiens	0	0	0	0	0	6	0	0	0	0	6
6.00	mir-4485	Homo sapiens	0	0	0	0	0	2	0	2	3	4	6
6.00	mir-7706	Homo sapiens	0	0	0	0	0	6	0	6	0	0	6
6.00	mir-1273h	Homo sapiens	0	0	0	0	0	0	0	0	0	6	6
5.00	mir-9-1	Homo sapiens	0	3	0	0	0	0	0	0	2	2	5
5.00	mir-29c	Homo sapiens	0	2	0	2	0	3	0	3	0	0	5
5.00	mir-342	Homo sapiens	1	2	1	2	1	3	1	3	0	0	5
5.00	mir-425	Homo sapiens	0	3	0	3	0	1	0	1	1	1	5
5.00	mir-484	Homo sapiens	1	5	1	5	0	0	0	0	0	0	5
5.00	mir-582	Homo sapiens	0	0	0	0	3	5	3	5	0	0	5
5.00	mir-629	Homo sapiens	4	5	4	5	0	0	0	0	0	0	5
5.00	mir-4446	Homo sapiens	0	0	0	0	4	5	4	5	0	0	5
5.00	mir-4472-2	Homo sapiens	0	0	0	0	0	0	0	0	0	5	5
5.00	mir-7851	Homo sapiens	0	0	0	0	0	0	0	0	0	5	5
4.00	mir-31	Homo sapiens	0	4	0	4	0	0	0	0	0	0	4
4.00	mir-193a	Homo sapiens	1	4	1	4	0	0	0	0	0	0	4
4.00	mir-135b	Homo sapiens	3	4	3	4	0	0	0	0	0	0	4
4.00	mir-424	Homo sapiens	0	0	0	0	2	4	2	4	0	0	4
4.00	mir-625	Homo sapiens	0	3	0	3	0	1	0	1	0	0	4
4.00	mir-1301	Homo sapiens	0	0	0	0	0	2	0	2	2	2	4
4.00	mir-4454	Homo sapiens	0	0	0	0	0	0	0	0	0	4	4
4.00	mir-5684	Homo sapiens	0	1	0	1	0	0	0	0	0	3	4
4.00	mir-9985	Homo sapiens	0	4	0	4	0	0	0	0	0	0	4
4.00	mir-10395	Homo sapiens	0	0	0	0	0	4	0	4	0	0	4
3.00	mir-29b-2	Homo sapiens	0	0	0	0	0	1	0	0	1	2	3
3.00	mir-197	Homo sapiens	0	0	0	0	1	1	1	1	1	2	3
3.00	mir-15b	Homo sapiens	0	1	0	1	0	2	0	2	0	0	3
3.00	mir-511	Homo sapiens	2	3	2	3	0	0	0	0	0	0	3
3.00	mir-181d	Homo sapiens	2	3	2	3	0	0	0	0	0	0	3
3.00	mir-651	Homo sapiens	0	3	0	3	0	0	0	0	0	0	3
3.00	mir-449b	Homo sapiens	1	3	1	2	0	0	0	0	0	0	3
3.00	mir-671	Homo sapiens	0	0	0	0	0	3	0	3	0	0	3
3.00	mir-874	Homo sapiens	0	0	0	0	1	3	1	3	0	0	3
3.00	mir-941-1	Homo sapiens	0	0	0	0	2	3	0	0	0	0	3
3.00	mir-1302-8	Homo sapiens	0	0	0	0	0	0	0	0	0	3	3
3.00	mir-1303	Homo sapiens	0	0	0	0	0	1	0	1	0	2	3
3.00	mir-378c	Homo sapiens	0	2	0	2	0	0	0	0	1	1	3
3.00	mir-3665	Homo sapiens	0	0	0	0	0	0	0	0	0	3	3
3.00	mir-4537	Homo sapiens	0	0	0	0	0	0	0	0	0	3	3
3.00	mir-941-5	Homo sapiens	0	0	0	0	2	3	0	0	0	0	3
3.00	mir-10399	Homo sapiens	0	1	0	1	0	0	0	0	2	2	3
2.00	mir-19a	Homo sapiens	0	0	0	0	0	2	0	2	0	0	2
2.00	mir-95	Homo sapiens	0	0	0	0	0	2	0	2	0	0	2
2.00	mir-7-2	Homo sapiens	1	1	0	0	0	0	0	0	1	1	2
2.00	mir-199b	Homo sapiens	0	0	0	0	0	2	0	0	0	0	2
2.00	mir-204	Homo sapiens	0	1	0	1	0	0	0	0	0	1	2
2.00	mir-194-1	Homo sapiens	0	2	0	0	0	0	0	0	0	0	2
2.00	mir-195	Homo sapiens	0	1	0	1	1	1	1	1	0	0	2
2.00	mir-155	Homo sapiens	0	2	0	2	0	0	0	0	0	0	2
2.00	mir-194-2	Homo sapiens	0	2	0	0	0	0	0	0	0	0	2
2.00	mir-30c-1	Homo sapiens	1	2	0	0	0	0	0	0	0	0	2
2.00	mir-363	Homo sapiens	0	0	0	0	0	2	0	2	0	0	2
2.00	mir-335	Homo sapiens	0	2	0	2	0	0	0	0	0	0	2
2.00	mir-486-1	Homo sapiens	1	2	0	0	0	0	0	0	0	0	2
2.00	mir-499a	Homo sapiens	1	2	1	2	0	0	0	0	0	0	2
2.00	mir-500a	Homo sapiens	0	0	0	0	0	2	0	2	0	0	2
2.00	mir-584	Homo sapiens	0	2	0	2	0	0	0	0	0	0	2
2.00	mir-421	Homo sapiens	0	0	0	0	0	2	0	2	0	0	2
2.00	mir-300	Homo sapiens	0	0	0	0	0	0	0	0	0	2	2
2.00	mir-873	Homo sapiens	0	0	0	0	0	0	0	0	2	2	2
2.00	mir-941-2	Homo sapiens	0	0	0	0	1	2	0	0	0	0	2
2.00	mir-941-3	Homo sapiens	0	0	0	0	2	2	0	0	0	0	2
2.00	mir-941-4	Homo sapiens	0	0	0	0	2	2	0	0	0	0	2
2.00	mir-1287	Homo sapiens	1	2	1	2	0	0	0	0	0	0	2
2.00	mir-1260a	Homo sapiens	0	0	0	0	0	0	0	0	0	2	2
2.00	mir-1268a	Homo sapiens	0	0	0	0	0	0	0	0	0	2	2
2.00	mir-1269a	Homo sapiens	0	0	0	0	0	2	0	2	0	0	2
2.00	mir-3613	Homo sapiens	1	2	1	2	0	0	0	0	0	0	2
2.00	mir-3908	Homo sapiens	0	0	0	0	0	0	0	0	0	2	2
2.00	mir-3909	Homo sapiens	0	0	0	0	1	2	1	2	0	0	2
2.00	mir-3913-1	Homo sapiens	0	2	0	0	0	0	0	0	0	0	2
2.00	mir-642b	Homo sapiens	0	2	0	2	0	0	0	0	0	0	2
2.00	mir-548ad	Homo sapiens	1	2	0	1	0	0	0	0	0	0	2
2.00	mir-5694	Homo sapiens	0	0	0	0	0	0	0	0	0	2	2
2.00	mir-6510	Homo sapiens	0	0	0	0	1	2	1	2	0	0	2
2.00	mir-6842	Homo sapiens	0	0	0	0	0	2	0	2	0	0	2
2.00	mir-7110	Homo sapiens	0	0	0	0	0	0	0	0	0	2	2
2.00	mir-486-2	Homo sapiens	2	2	0	0	0	0	0	0	0	0	2
2.00	mir-1843	Homo sapiens	0	2	0	2	0	0	0	0	0	0	2
1.00	mir-15a	Homo sapiens	0	0	0	0	0	0	0	0	1	1	1
1.00	mir-19b-1	Homo sapiens	0	0	0	0	0	1	0	0	0	0	1
1.00	mir-103a-2	Homo sapiens	0	0	0	0	0	0	0	0	1	1	1
1.00	mir-107	Homo sapiens	0	0	0	0	0	0	0	0	1	1	1
1.00	mir-199a-1	Homo sapiens	0	0	0	0	0	1	0	0	0	0	1
1.00	mir-7-1	Homo sapiens	1	1	0	0	0	0	0	0	0	0	1
1.00	mir-7-3	Homo sapiens	1	1	0	0	0	0	0	0	0	0	1
1.00	mir-10a	Homo sapiens	0	1	0	1	0	0	0	0	0	0	1
1.00	mir-34a	Homo sapiens	0	1	0	1	0	0	0	0	0	0	1
1.00	mir-181c	Homo sapiens	0	0	0	0	0	1	0	1	0	0	1
1.00	mir-187	Homo sapiens	0	0	0	0	0	1	0	1	0	0	1
1.00	mir-199a-2	Homo sapiens	0	0	0	0	0	1	0	0	0	0	1
1.00	mir-210	Homo sapiens	0	0	0	0	0	1	0	1	0	0	1
1.00	mir-217	Homo sapiens	0	1	0	1	0	0	0	0	0	0	1
1.00	mir-30b	Homo sapiens	0	0	0	0	0	1	0	1	0	0	1
1.00	mir-122	Homo sapiens	0	1	0	1	0	0	0	0	0	0	1
1.00	mir-130a	Homo sapiens	0	0	0	0	0	0	0	0	1	1	1
1.00	mir-135a-2	Homo sapiens	0	1	0	0	0	0	0	0	0	0	1
1.00	mir-145	Homo sapiens	0	0	0	0	0	1	0	1	0	0	1
1.00	mir-150	Homo sapiens	0	1	0	1	0	0	0	0	0	0	1
1.00	mir-130b	Homo sapiens	0	1	0	1	0	0	0	0	0	0	1
1.00	mir-374a	Homo sapiens	0	1	0	1	0	0	0	0	0	0	1
1.00	mir-330	Homo sapiens	0	0	0	0	0	1	0	1	0	0	1
1.00	mir-324	Homo sapiens	0	0	0	0	0	0	0	0	0	1	1
1.00	mir-431	Homo sapiens	0	0	0	0	0	0	0	0	0	1	1
1.00	mir-514a-1	Homo sapiens	0	0	0	0	1	1	0	0	0	0	1
1.00	mir-514a-2	Homo sapiens	0	0	0	0	1	1	0	0	0	0	1
1.00	mir-514a-3	Homo sapiens	0	0	0	0	1	1	0	0	0	0	1
1.00	mir-455	Homo sapiens	0	0	0	0	0	0	0	0	0	1	1
1.00	mir-576	Homo sapiens	0	0	0	0	0	1	0	1	0	0	1
1.00	mir-597	Homo sapiens	0	0	0	0	0	0	0	0	1	1	1
1.00	mir-624	Homo sapiens	0	1	0	1	0	0	0	0	0	0	1
1.00	mir-660	Homo sapiens	0	1	0	1	0	0	0	0	0	0	1
1.00	mir-320c-1	Homo sapiens	0	0	0	0	0	1	0	0	0	0	1
1.00	mir-378d-2	Homo sapiens	0	1	0	1	0	0	0	0	0	0	1
1.00	mir-937	Homo sapiens	0	1	0	1	0	0	0	0	0	0	1
1.00	mir-1285-2	Homo sapiens	0	0	0	0	0	0	0	0	0	1	1
1.00	mir-1294	Homo sapiens	0	0	0	0	0	0	0	0	0	1	1
1.00	mir-1299	Homo sapiens	0	0	0	0	0	1	0	1	0	0	1
1.00	mir-548f-3	Homo sapiens	0	0	0	0	0	1	0	0	0	0	1
1.00	mir-320d-2	Homo sapiens	0	0	0	0	0	0	0	0	0	1	1
1.00	mir-2115	Homo sapiens	0	0	0	0	0	0	0	0	1	1	1
1.00	mir-3127	Homo sapiens	0	0	0	0	1	1	1	1	0	0	1
1.00	mir-548t	Homo sapiens	1	1	1	1	0	0	0	0	0	0	1
1.00	mir-3150a	Homo sapiens	0	1	0	1	0	0	0	0	0	0	1
1.00	mir-3158-1	Homo sapiens	0	0	0	0	0	1	0	0	0	0	1
1.00	mir-3158-2	Homo sapiens	0	1	0	0	0	0	0	0	0	0	1
1.00	mir-4295	Homo sapiens	0	0	0	0	0	0	0	0	0	1	1
1.00	mir-4326	Homo sapiens	0	0	0	0	0	0	0	0	0	1	1
1.00	mir-3617	Homo sapiens	0	1	0	1	0	0	0	0	0	0	1
1.00	mir-3648-1	Homo sapiens	0	0	0	0	0	0	0	0	1	1	1
1.00	mir-3150b	Homo sapiens	0	0	0	0	0	1	0	1	0	0	1
1.00	mir-676	Homo sapiens	0	0	0	0	1	1	1	1	0	0	1
1.00	mir-548o-2	Homo sapiens	0	0	0	0	1	1	0	0	0	0	1
1.00	mir-378g	Homo sapiens	0	1	0	1	0	0	0	0	0	0	1
1.00	mir-4440	Homo sapiens	0	0	0	0	0	1	0	1	0	0	1
1.00	mir-4473	Homo sapiens	0	0	0	0	0	1	0	1	0	0	1
1.00	mir-4497	Homo sapiens	0	0	0	0	0	0	0	0	0	1	1
1.00	mir-4520-1	Homo sapiens	0	0	0	0	0	1	0	1	0	0	1
1.00	mir-4659a	Homo sapiens	0	0	0	0	0	1	0	1	0	0	1
1.00	mir-4664	Homo sapiens	0	0	0	0	0	1	0	1	0	0	1
1.00	mir-4677	Homo sapiens	0	0	0	0	0	1	0	1	0	0	1
1.00	mir-4699	Homo sapiens	0	1	0	1	0	0	0	0	0	0	1
1.00	mir-4776-2	Homo sapiens	0	0	0	0	0	1	0	0	0	0	1
1.00	mir-5003	Homo sapiens	0	0	0	0	0	0	0	0	0	1	1
1.00	mir-548az	Homo sapiens	0	1	0	1	0	0	0	0	0	0	1
1.00	mir-6501	Homo sapiens	0	1	0	1	0	0	0	0	0	0	1
1.00	mir-6511b-1	Homo sapiens	0	0	0	0	0	1	0	0	0	0	1
1.00	mir-6735	Homo sapiens	0	0	0	0	0	0	0	0	0	1	1
1.00	mir-6843	Homo sapiens	0	0	0	0	0	1	0	1	0	0	1
1.00	mir-6846	Homo sapiens	0	0	0	0	0	0	0	0	0	1	1
1.00	mir-6866	Homo sapiens	0	0	0	0	0	0	0	0	0	1	1
1.00	mir-6875	Homo sapiens	0	0	0	0	0	0	0	0	1	1	1
1.00	mir-6879	Homo sapiens	0	0	0	0	0	1	0	1	0	0	1
1.00	mir-6892	Homo sapiens	0	0	0	0	0	1	0	1	0	0	1
1.00	mir-8081	Homo sapiens	0	0	0	0	0	0	0	0	0	1	1
1.00	mir-8485	Homo sapiens	0	0	0	0	0	0	0	0	0	1	1
1.00	mir-3648-2	Homo sapiens	0	0	0	0	0	0	0	0	1	1	1
1.00	mir-12136	Homo sapiens	0	0	0	0	0	0	0	0	1	1	1
0.00	mir-19b-2	Homo sapiens	0	0	0	0	0	0	0	0	0	0	0
0.00	mir-29b-1	Homo sapiens	0	0	0	0	0	0	0	0	0	0	0
0.00	mir-103a-1	Homo sapiens	0	0	0	0	0	0	0	0	0	0	0
0.00	mir-548f-2	Homo sapiens	0	0	0	0	0	0	0	0	0	0	0
0.00	mir-548o	Homo sapiens	0	0	0	0	0	0	0	0	0	0	0
0.00	mir-320c-2	Homo sapiens	0	0	0	0	0	0	0	0	0	0	0
0.00	mir-3913-2	Homo sapiens	0	0	0	0	0	0	0	0	0	0	0
0.00	mir-548ae-2	Homo sapiens	0	0	0	0	0	0	0	0	0	0	0
0.00	mir-3529	Homo sapiens	0	0	0	0	0	0	0	0	0	0	0
0.00	mir-4776-1	Homo sapiens	0	0	0	0	0	0	0	0	0	0	0
0.00	mir-6511b-2	Homo sapiens	0	0	0	0	0	0	0	0	0	0	0
0.00	mir-9902-1	Homo sapiens	0	0	0	0	0	0	0	0	0	0	0
0.00	mir-9902-2	Homo sapiens	0	0	0	0	0	0	0	0	0	0	0

## Sheet: 13A
Expression values	Name	Resource	Exact mature 5'	Mature 5'	Unique exact mature 5'	Unique mature 5'	Exact mature 3'	Mature 3'	Unique exact mature 3'	Unique mature 3'	Exact other	Other	Total
118,266.00	mir-148a	Homo sapiens	18	29	18	29	105183	118128	105183	117980	99	109	118266
23,101.00	mir-21	Homo sapiens	8683	22209	8683	22209	13	18	13	18	782	874	23101
15,347.00	mir-99a	Homo sapiens	62	15311	62	15290	0	0	0	0	35	36	15347
14,986.00	mir-200a	Homo sapiens	392	902	392	902	14	13999	14	13985	78	85	14986
13,280.00	mir-34c	Homo sapiens	3012	12249	3012	12248	93	208	93	208	785	823	13280
11,285.00	mir-27b	Homo sapiens	0	1	0	1	541	11278	541	11211	0	6	11285
8,734.00	mir-151a	Homo sapiens	11	16	11	16	5632	8633	5632	8633	39	85	8734
8,549.00	mir-200b	Homo sapiens	45	178	45	178	961	8284	961	8268	21	87	8549
6,996.00	let-7b	Homo sapiens	2332	6134	2332	6132	0	1	0	1	807	861	6996
6,535.00	mir-375	Homo sapiens	0	0	0	0	1550	6288	1550	6288	217	247	6535
6,398.00	mir-27a	Homo sapiens	7	35	7	35	33	6363	33	6294	0	0	6398
5,148.00	mir-30d	Homo sapiens	578	4964	578	4957	2	8	2	7	148	176	5148
4,732.00	mir-200c	Homo sapiens	0	4	0	4	896	4573	896	4557	140	155	4732
4,275.00	let-7i	Homo sapiens	3123	4108	3123	4104	0	0	0	0	146	167	4275
3,604.00	mir-3074	Homo sapiens	1	3564	1	3564	0	40	0	40	0	0	3604
2,843.00	mir-10400	Homo sapiens	0	2841	0	2841	0	0	0	0	1	2	2843
2,788.00	mir-8072	Homo sapiens	0	0	0	0	0	0	0	0	0	2788	2788
2,666.00	mir-423	Homo sapiens	790	1756	790	1756	323	677	323	677	212	233	2666
2,107.00	mir-3960	Homo sapiens	0	0	0	0	0	210	0	210	1	1897	2107
2,094.00	mir-429	Homo sapiens	0	0	0	0	868	2064	868	2064	30	30	2094
1,982.00	mir-205	Homo sapiens	350	1978	350	1978	0	0	0	0	2	4	1982
1,875.00	mir-22	Homo sapiens	1	178	1	178	790	1574	790	1574	111	123	1875
1,844.00	mir-92b	Homo sapiens	0	51	0	51	465	1647	465	1612	121	146	1844
1,626.00	let-7c	Homo sapiens	1013	1546	1013	1533	0	3	0	3	62	77	1626
1,606.00	mir-146a	Homo sapiens	564	1602	564	1589	0	0	0	0	2	4	1606
1,549.00	let-7g	Homo sapiens	202	1520	202	1512	0	0	0	0	23	29	1549
1,465.00	mir-30a	Homo sapiens	197	1078	197	1074	72	238	72	231	135	149	1465
1,317.00	mir-183	Homo sapiens	806	1314	806	1314	0	0	0	0	0	3	1317
1,080.00	mir-146b	Homo sapiens	658	1074	658	1059	0	4	0	4	2	2	1080
1,031.00	let-7f-2	Homo sapiens	150	1009	0	103	0	1	0	1	19	21	1031
1,023.00	mir-320a	Homo sapiens	0	0	0	0	373	1002	373	966	2	21	1023
989.00	let-7a-1	Homo sapiens	123	916	0	3	5	21	0	0	36	52	989
988.00	let-7a-3	Homo sapiens	123	905	0	1	5	26	0	0	37	57	988
973.00	mir-29a	Homo sapiens	0	0	0	0	33	861	33	861	106	112	973
961.00	let-7a-2	Homo sapiens	123	909	0	1	0	0	0	0	38	52	961
939.00	let-7f-1	Homo sapiens	149	914	0	5	0	6	0	6	18	19	939
886.00	mir-26a-1	Homo sapiens	641	875	0	0	0	0	0	0	10	11	886
880.00	mir-26a-2	Homo sapiens	640	868	0	0	0	2	0	2	9	10	880
851.00	mir-25	Homo sapiens	1	1	1	1	495	844	495	844	2	6	851
841.00	mir-128-1	Homo sapiens	0	0	0	0	277	837	0	314	0	4	841
745.00	mir-222	Homo sapiens	0	0	0	0	247	624	247	624	102	121	745
700.00	mir-203b	Homo sapiens	1	699	1	699	0	0	0	0	1	1	700
672.00	mir-1180	Homo sapiens	0	0	0	0	431	657	431	657	12	15	672
640.00	mir-378a	Homo sapiens	0	2	0	2	11	638	11	638	0	0	640
635.00	mir-34b	Homo sapiens	0	15	0	13	3	615	3	615	5	5	635
622.00	mir-148b	Homo sapiens	0	7	0	7	282	613	282	461	2	2	622
600.00	mir-30e	Homo sapiens	41	320	41	316	73	167	73	160	95	113	600
579.00	mir-99b	Homo sapiens	64	508	64	508	33	61	33	61	8	10	579
572.00	mir-182	Homo sapiens	21	457	21	457	0	9	0	9	93	106	572
550.00	mir-100	Homo sapiens	6	538	6	518	0	0	0	0	11	12	550
547.00	mir-128-2	Homo sapiens	0	0	0	0	278	547	0	11	0	0	547
529.00	mir-141	Homo sapiens	13	29	13	29	0	445	0	431	50	55	529
522.00	mir-449a	Homo sapiens	214	465	214	460	0	0	0	0	38	57	522
520.00	mir-449c	Homo sapiens	56	513	56	513	0	1	0	1	4	6	520
479.00	mir-361	Homo sapiens	6	18	6	18	43	448	43	448	11	13	479
474.00	mir-142	Homo sapiens	18	37	18	37	3	25	3	25	359	412	474
421.00	mir-1246	Homo sapiens	23	421	23	421	0	0	0	0	0	0	421
402.00	mir-125a	Homo sapiens	3	339	3	339	0	9	0	9	50	54	402
380.00	mir-532	Homo sapiens	284	376	284	376	0	4	0	4	0	0	380
371.00	mir-744	Homo sapiens	8	363	8	363	0	0	0	0	1	8	371
368.00	mir-3184	Homo sapiens	0	126	0	126	0	0	0	0	211	242	368
363.00	mir-101-2	Homo sapiens	0	0	0	0	52	353	0	24	7	10	363
360.00	mir-181a-1	Homo sapiens	13	297	0	0	2	3	2	3	57	60	360
357.00	mir-181a-2	Homo sapiens	14	289	0	0	4	9	4	9	57	59	357
329.00	mir-101-1	Homo sapiens	0	0	0	0	53	320	0	0	7	9	329
319.00	mir-28	Homo sapiens	4	94	4	94	61	212	61	212	10	13	319
290.00	mir-186	Homo sapiens	98	287	98	287	0	0	0	0	2	3	290
283.00	mir-3159	Homo sapiens	0	0	0	0	0	0	0	0	40	283	283
272.00	mir-192	Homo sapiens	17	176	17	175	0	0	0	0	61	96	272
255.00	mir-224	Homo sapiens	0	183	0	183	0	1	0	1	66	71	255
253.00	mir-184	Homo sapiens	0	0	0	0	183	242	183	242	11	11	253
230.00	mir-26b	Homo sapiens	84	226	84	226	0	3	0	3	0	1	230
223.00	mir-221	Homo sapiens	0	25	0	25	38	162	38	162	34	36	223
223.00	mir-140	Homo sapiens	15	37	15	37	29	142	29	142	14	44	223
220.00	mir-2110	Homo sapiens	30	149	30	149	0	0	0	0	22	71	220
220.00	mir-8086	Homo sapiens	0	0	0	0	0	0	0	0	14	220	220
217.00	mir-92a-1	Homo sapiens	1	1	1	1	84	211	0	32	3	5	217
214.00	mir-152	Homo sapiens	0	0	0	0	55	212	55	212	0	2	214
191.00	mir-340	Homo sapiens	99	166	99	166	1	20	1	20	2	5	191
175.00	mir-92a-2	Homo sapiens	0	0	0	0	84	172	0	5	2	3	175
169.00	mir-16-2	Homo sapiens	13	61	0	0	13	103	13	103	5	5	169
167.00	mir-342	Homo sapiens	46	124	46	124	7	33	7	33	4	10	167
167.00	mir-1307	Homo sapiens	3	7	3	7	0	159	0	159	0	1	167
161.00	mir-191	Homo sapiens	61	141	61	141	0	8	0	8	11	12	161
160.00	mir-1285-1	Homo sapiens	0	6	0	6	0	1	0	1	30	153	160
153.00	mir-23b	Homo sapiens	6	41	6	41	0	64	0	64	31	48	153
152.00	mir-125b-2	Homo sapiens	26	99	0	0	0	34	0	34	18	19	152
149.00	let-7d	Homo sapiens	0	142	0	138	0	3	0	3	3	4	149
147.00	mir-24-2	Homo sapiens	0	48	0	48	0	80	0	0	15	19	147
130.00	mir-125b-1	Homo sapiens	26	103	0	0	3	8	3	8	17	19	130
126.00	mir-95	Homo sapiens	0	0	0	0	3	126	3	126	0	0	126
116.00	mir-619	Homo sapiens	0	49	0	49	0	0	0	0	6	67	116
108.00	mir-451a	Homo sapiens	0	108	0	108	0	0	0	0	0	0	108
107.00	mir-190b	Homo sapiens	47	107	47	107	0	0	0	0	0	0	107
106.00	mir-132	Homo sapiens	4	41	4	41	6	52	6	52	12	13	106
104.00	mir-30c-2	Homo sapiens	60	83	0	0	0	6	0	6	15	15	104
97.00	mir-24-1	Homo sapiens	0	13	0	13	0	83	0	0	1	1	97
94.00	mir-30c-1	Homo sapiens	59	79	0	0	0	0	0	0	15	15	94
91.00	mir-98	Homo sapiens	41	70	41	70	0	0	0	0	13	21	91
90.00	mir-511	Homo sapiens	49	89	49	89	0	1	0	1	0	0	90
90.00	mir-7706	Homo sapiens	0	0	0	0	5	74	5	74	13	16	90
84.00	mir-3615	Homo sapiens	0	0	0	0	2	82	2	82	2	2	84
80.00	mir-106b	Homo sapiens	0	2	0	2	17	59	17	59	18	19	80
80.00	mir-7851	Homo sapiens	0	0	0	0	0	0	0	0	0	80	80
79.00	mir-143	Homo sapiens	0	0	0	0	66	79	66	79	0	0	79
74.00	let-7e	Homo sapiens	3	69	3	65	0	0	0	0	4	5	74
71.00	mir-23a	Homo sapiens	2	4	2	4	0	66	0	66	0	1	71
68.00	mir-769	Homo sapiens	33	65	33	65	0	1	0	1	2	2	68
66.00	mir-363	Homo sapiens	0	0	0	0	38	64	38	64	2	2	66
66.00	mir-345	Homo sapiens	35	66	35	66	0	0	0	0	0	0	66
66.00	mir-708	Homo sapiens	0	3	0	3	0	55	0	55	8	8	66
66.00	mir-1843	Homo sapiens	3	52	3	52	0	0	0	0	3	14	66
65.00	mir-328	Homo sapiens	0	0	0	0	36	64	36	64	1	1	65
65.00	mir-642b	Homo sapiens	32	63	32	63	0	0	0	0	0	2	65
64.00	mir-3929	Homo sapiens	0	0	0	0	0	0	0	0	2	64	64
63.00	mir-16-1	Homo sapiens	14	63	0	2	0	0	0	0	0	0	63
63.00	mir-10a	Homo sapiens	3	58	3	58	0	0	0	0	5	5	63
62.00	mir-9-3	Homo sapiens	2	42	0	0	0	2	0	0	18	18	62
61.00	mir-135b	Homo sapiens	47	60	47	60	0	1	0	1	0	0	61
59.00	mir-181b-1	Homo sapiens	4	15	0	0	0	2	0	2	39	42	59
59.00	mir-9-1	Homo sapiens	2	39	0	0	0	2	0	0	18	18	59
59.00	mir-181b-2	Homo sapiens	5	14	0	0	0	0	0	0	40	45	59
59.00	mir-6510	Homo sapiens	0	0	0	0	10	59	10	59	0	0	59
58.00	mir-425	Homo sapiens	1	47	1	47	0	2	0	2	6	9	58
58.00	mir-582	Homo sapiens	0	0	0	0	46	57	46	57	1	1	58
58.00	mir-628	Homo sapiens	6	22	6	22	1	32	1	32	3	4	58
58.00	mir-4430	Homo sapiens	0	0	0	0	0	0	0	0	0	58	58
57.00	mir-218-1	Homo sapiens	27	55	0	0	0	0	0	0	2	2	57
56.00	mir-9-2	Homo sapiens	2	35	0	0	1	4	0	0	16	17	56
55.00	mir-3135b	Homo sapiens	0	8	0	8	0	0	0	0	0	47	55
54.00	mir-339	Homo sapiens	1	3	1	3	1	46	1	46	5	5	54
53.00	mir-4446	Homo sapiens	0	0	0	0	17	51	17	51	2	2	53
51.00	mir-32	Homo sapiens	17	46	17	46	0	4	0	4	1	1	51
49.00	mir-5684	Homo sapiens	0	2	0	2	0	0	0	0	0	47	49
48.00	mir-218-2	Homo sapiens	26	48	0	0	0	0	0	0	0	0	48
48.00	mir-3648-2	Homo sapiens	0	0	0	0	0	0	0	0	40	48	48
47.00	mir-155	Homo sapiens	1	38	1	38	0	0	0	0	8	9	47
46.00	mir-574	Homo sapiens	0	1	0	1	21	34	21	34	8	11	46
46.00	mir-1290	Homo sapiens	0	0	0	0	0	46	0	46	0	0	46
45.00	mir-1273h	Homo sapiens	0	0	0	0	0	1	0	1	1	44	45
42.00	mir-3648-1	Homo sapiens	0	0	0	0	0	0	0	0	37	42	42
42.00	mir-10395	Homo sapiens	0	0	0	0	12	42	12	42	0	0	42
39.00	mir-150	Homo sapiens	14	33	14	33	0	5	0	5	1	1	39
38.00	mir-484	Homo sapiens	5	38	5	38	0	0	0	0	0	0	38
38.00	mir-625	Homo sapiens	0	30	0	30	0	8	0	8	0	0	38
38.00	mir-320b-2	Homo sapiens	0	0	0	0	0	38	0	0	0	0	38
37.00	mir-320b-1	Homo sapiens	0	0	0	0	0	37	0	0	0	0	37
37.00	mir-1301	Homo sapiens	0	0	0	0	1	23	1	23	9	14	37
35.00	mir-378i	Homo sapiens	0	35	0	35	0	0	0	0	0	0	35
34.00	mir-449b	Homo sapiens	8	29	8	22	3	5	3	5	0	0	34
33.00	mir-96	Homo sapiens	16	32	16	32	0	0	0	0	1	1	33
32.00	mir-223	Homo sapiens	0	11	0	11	2	17	2	17	4	4	32
31.00	mir-29c	Homo sapiens	0	21	0	21	2	8	2	8	2	2	31
31.00	mir-3665	Homo sapiens	0	0	0	0	0	0	0	0	0	31	31
29.00	mir-149	Homo sapiens	6	14	6	14	0	0	0	0	12	15	29
28.00	mir-210	Homo sapiens	0	0	0	0	0	23	0	23	1	5	28
27.00	mir-671	Homo sapiens	0	1	0	1	15	24	15	24	0	2	27
27.00	mir-941-4	Homo sapiens	0	0	0	0	17	26	0	0	1	1	27
27.00	mir-4472-2	Homo sapiens	0	0	0	0	0	0	0	0	3	27	27
27.00	mir-9985	Homo sapiens	0	27	0	27	0	0	0	0	0	0	27
26.00	mir-185	Homo sapiens	4	26	4	26	0	0	0	0	0	0	26
26.00	mir-499a	Homo sapiens	5	26	5	26	0	0	0	0	0	0	26
26.00	mir-103b-1	Homo sapiens	7	22	0	0	0	0	0	0	2	4	26
25.00	mir-501	Homo sapiens	0	1	0	1	4	24	4	24	0	0	25
25.00	mir-486-2	Homo sapiens	3	25	0	3	0	0	0	0	0	0	25
24.00	mir-941-1	Homo sapiens	0	0	0	0	17	24	0	0	0	0	24
24.00	mir-103b-2	Homo sapiens	7	22	0	0	0	0	0	0	1	2	24
24.00	mir-3135a	Homo sapiens	0	0	0	0	0	0	0	0	0	24	24
23.00	mir-194-2	Homo sapiens	0	23	0	0	0	0	0	0	0	0	23
23.00	mir-486-1	Homo sapiens	4	23	0	0	0	0	0	0	0	0	23
23.00	mir-941-2	Homo sapiens	0	0	0	0	17	22	0	0	1	1	23
23.00	mir-4488	Homo sapiens	0	23	0	23	0	0	0	0	0	0	23
22.00	mir-941-3	Homo sapiens	0	0	0	0	18	22	0	0	0	0	22
22.00	mir-941-5	Homo sapiens	0	0	0	0	17	21	0	0	1	1	22
21.00	mir-7-1	Homo sapiens	13	19	0	0	0	0	0	0	2	2	21
21.00	mir-7-2	Homo sapiens	13	20	0	0	0	0	0	0	1	1	21
21.00	mir-194-1	Homo sapiens	0	21	0	0	0	0	0	0	0	0	21
21.00	mir-335	Homo sapiens	0	0	0	0	11	21	11	21	0	0	21
20.00	mir-30b	Homo sapiens	3	19	3	19	0	1	0	1	0	0	20
20.00	mir-6842	Homo sapiens	0	0	0	0	5	19	5	19	1	1	20
19.00	mir-7-3	Homo sapiens	13	18	0	0	0	0	0	0	1	1	19
19.00	mir-629	Homo sapiens	11	19	11	19	0	0	0	0	0	0	19
19.00	mir-1287	Homo sapiens	3	15	3	15	0	1	0	1	3	3	19
18.00	mir-147b	Homo sapiens	0	0	0	0	0	18	0	18	0	0	18
17.00	mir-589	Homo sapiens	0	17	0	17	0	0	0	0	0	0	17
17.00	mir-378d-2	Homo sapiens	0	16	0	16	0	0	0	0	0	1	17
16.00	mir-651	Homo sapiens	2	16	2	16	0	0	0	0	0	0	16
15.00	mir-4485	Homo sapiens	0	0	0	0	0	10	0	10	2	5	15
14.00	mir-197	Homo sapiens	0	0	0	0	1	11	1	11	3	3	14
14.00	mir-181d	Homo sapiens	9	14	9	14	0	0	0	0	0	0	14
14.00	mir-874	Homo sapiens	0	0	0	0	0	14	0	14	0	0	14
13.00	mir-29b-1	Homo sapiens	0	0	0	0	0	4	0	0	8	9	13
13.00	mir-452	Homo sapiens	5	7	5	7	0	0	0	0	6	6	13
13.00	mir-1268a	Homo sapiens	0	1	0	1	0	0	0	0	0	12	13
13.00	mir-6503	Homo sapiens	0	0	0	0	0	12	0	12	0	1	13
12.00	mir-29b-2	Homo sapiens	0	0	0	0	0	3	0	0	8	9	12
12.00	mir-455	Homo sapiens	0	11	0	11	0	0	0	0	0	1	12
12.00	mir-652	Homo sapiens	0	0	0	0	4	12	4	12	0	0	12
11.00	mir-576	Homo sapiens	0	0	0	0	0	10	0	10	1	1	11
11.00	mir-421	Homo sapiens	0	0	0	0	2	11	2	11	0	0	11
11.00	mir-4664	Homo sapiens	0	0	0	0	1	11	1	11	0	0	11
10.00	mir-1285-2	Homo sapiens	0	0	0	0	0	0	0	0	0	10	10
9.00	mir-204	Homo sapiens	1	9	1	9	0	0	0	0	0	0	9
9.00	mir-126	Homo sapiens	0	0	0	0	3	9	3	9	0	0	9
9.00	mir-193a	Homo sapiens	0	7	0	7	0	0	0	0	1	2	9
9.00	mir-330	Homo sapiens	0	7	0	7	0	2	0	2	0	0	9
9.00	mir-324	Homo sapiens	0	2	0	2	0	2	0	2	0	5	9
9.00	mir-502	Homo sapiens	0	0	0	0	0	9	0	9	0	0	9
9.00	mir-374b	Homo sapiens	2	9	2	9	0	0	0	0	0	0	9
9.00	mir-1303	Homo sapiens	0	0	0	0	3	5	3	5	0	4	9
9.00	mir-3195	Homo sapiens	0	0	0	0	0	0	0	0	0	9	9
9.00	mir-4449	Homo sapiens	0	0	0	0	0	5	0	5	4	4	9
9.00	mir-7704	Homo sapiens	0	9	0	9	0	0	0	0	0	0	9
8.00	mir-34a	Homo sapiens	2	5	2	5	0	0	0	0	2	3	8
8.00	mir-130a	Homo sapiens	0	0	0	0	0	5	0	5	0	3	8
8.00	mir-505	Homo sapiens	0	6	0	6	0	2	0	2	0	0	8
8.00	mir-659	Homo sapiens	7	8	7	8	0	0	0	0	0	0	8
8.00	mir-766	Homo sapiens	0	4	0	4	4	4	4	4	0	0	8
8.00	mir-760	Homo sapiens	0	0	0	0	1	8	1	8	0	0	8
8.00	mir-1273c	Homo sapiens	0	0	0	0	0	0	0	0	0	8	8
8.00	mir-6843	Homo sapiens	0	0	0	0	0	8	0	8	0	0	8
7.00	mir-19a	Homo sapiens	0	0	0	0	0	7	0	7	0	0	7
7.00	mir-20a	Homo sapiens	7	7	7	7	0	0	0	0	0	0	7
7.00	mir-10b	Homo sapiens	0	7	0	7	0	0	0	0	0	0	7
7.00	mir-212	Homo sapiens	3	4	3	4	0	2	0	2	1	1	7
7.00	mir-195	Homo sapiens	4	4	4	4	0	3	0	3	0	0	7
7.00	mir-500a	Homo sapiens	0	1	0	1	0	6	0	6	0	0	7
7.00	mir-660	Homo sapiens	2	7	2	7	0	0	0	0	0	0	7
7.00	mir-548o	Homo sapiens	0	0	0	0	6	7	0	0	0	0	7
7.00	mir-378c	Homo sapiens	0	4	0	4	0	0	0	0	3	3	7
7.00	mir-3909	Homo sapiens	0	0	0	0	2	4	2	4	0	3	7
7.00	mir-3913-1	Homo sapiens	0	7	0	0	0	0	0	0	0	0	7
7.00	mir-1268b	Homo sapiens	0	0	0	0	0	0	0	0	0	7	7
7.00	mir-4661	Homo sapiens	1	7	1	7	0	0	0	0	0	0	7
7.00	mir-4662a	Homo sapiens	4	7	4	7	0	0	0	0	0	0	7
7.00	mir-4677	Homo sapiens	0	4	0	4	0	1	0	1	2	2	7
6.00	mir-31	Homo sapiens	0	6	0	6	0	0	0	0	0	0	6
6.00	mir-199a-2	Homo sapiens	2	2	0	0	0	4	0	0	0	0	6
6.00	mir-374a	Homo sapiens	0	2	0	2	0	2	0	2	1	2	6
6.00	mir-877	Homo sapiens	1	4	1	4	0	1	0	1	1	1	6
6.00	mir-1295a	Homo sapiens	0	0	0	0	3	6	3	6	0	0	6
6.00	mir-1269a	Homo sapiens	0	0	0	0	2	6	2	6	0	0	6
6.00	mir-3158-1	Homo sapiens	0	4	0	0	0	2	0	0	0	0	6
6.00	mir-3158-2	Homo sapiens	0	5	0	0	0	1	0	0	0	0	6
6.00	mir-4326	Homo sapiens	0	2	0	2	0	0	0	0	4	4	6
6.00	mir-3605	Homo sapiens	0	3	0	3	0	1	0	1	2	2	6
6.00	mir-3913-2	Homo sapiens	0	6	0	0	0	0	0	0	0	0	6
6.00	mir-548o-2	Homo sapiens	0	0	0	0	6	6	0	0	0	0	6
6.00	mir-4423	Homo sapiens	0	5	0	5	0	1	0	1	0	0	6
5.00	mir-199a-1	Homo sapiens	1	1	0	0	0	4	0	0	0	0	5
5.00	mir-129-1	Homo sapiens	4	5	0	0	0	0	0	0	0	0	5
5.00	mir-199b	Homo sapiens	1	2	1	2	0	3	0	0	0	0	5
5.00	mir-129-2	Homo sapiens	4	5	0	0	0	0	0	0	0	0	5
5.00	mir-548d-2	Homo sapiens	0	5	0	3	0	0	0	0	0	0	5
5.00	mir-1304	Homo sapiens	0	0	0	0	0	1	0	1	0	4	5
5.00	mir-1248	Homo sapiens	0	0	0	0	0	0	0	0	5	5	5
5.00	mir-1278	Homo sapiens	0	0	0	0	5	5	5	5	0	0	5
5.00	mir-1292	Homo sapiens	2	2	2	2	0	0	0	0	2	3	5
5.00	mir-3663	Homo sapiens	3	5	3	5	0	0	0	0	0	0	5
5.00	mir-10396b	Homo sapiens	0	1	0	1	0	2	0	2	2	2	5
5.00	mir-10527	Homo sapiens	1	5	1	5	0	0	0	0	0	0	5
4.00	mir-214	Homo sapiens	1	3	1	3	0	1	0	1	0	0	4
4.00	mir-15b	Homo sapiens	1	1	1	1	0	3	0	3	0	0	4
4.00	mir-424	Homo sapiens	0	0	0	0	1	4	1	4	0	0	4
4.00	mir-450a-1	Homo sapiens	0	4	0	0	0	0	0	0	0	0	4
4.00	mir-504	Homo sapiens	0	4	0	4	0	0	0	0	0	0	4
4.00	mir-581	Homo sapiens	3	4	3	4	0	0	0	0	0	0	4
4.00	mir-598	Homo sapiens	0	0	0	0	0	3	0	3	1	1	4
4.00	mir-1468	Homo sapiens	3	4	3	4	0	0	0	0	0	0	4
4.00	mir-934	Homo sapiens	0	4	0	4	0	0	0	0	0	0	4
4.00	mir-1262	Homo sapiens	0	4	0	4	0	0	0	0	0	0	4
4.00	mir-1306	Homo sapiens	0	0	0	0	0	2	0	2	1	2	4
4.00	mir-320c-2	Homo sapiens	0	0	0	0	0	4	0	0	0	0	4
4.00	mir-1908	Homo sapiens	3	4	3	4	0	0	0	0	0	0	4
4.00	mir-544b	Homo sapiens	0	0	0	0	0	0	0	0	0	4	4
4.00	mir-3613	Homo sapiens	3	4	3	4	0	0	0	0	0	0	4
4.00	mir-3617	Homo sapiens	4	4	4	4	0	0	0	0	0	0	4
4.00	mir-676	Homo sapiens	0	0	0	0	1	4	1	4	0	0	4
4.00	mir-1295b	Homo sapiens	0	2	0	2	0	2	0	2	0	0	4
4.00	mir-5689	Homo sapiens	0	0	0	0	0	0	0	0	0	4	4
4.00	mir-6500	Homo sapiens	0	0	0	0	3	4	3	4	0	0	4
4.00	mir-7705	Homo sapiens	0	0	0	0	0	0	0	0	4	4	4
3.00	mir-19b-1	Homo sapiens	0	0	0	0	0	3	0	0	0	0	3
3.00	mir-103a-2	Homo sapiens	0	0	0	0	0	1	0	0	2	2	3
3.00	mir-107	Homo sapiens	0	0	0	0	0	0	0	0	3	3	3
3.00	mir-215	Homo sapiens	0	2	0	1	0	0	0	0	0	1	3
3.00	mir-144	Homo sapiens	0	0	0	0	3	3	3	3	0	0	3
3.00	mir-422a	Homo sapiens	0	3	0	3	0	0	0	0	0	0	3
3.00	mir-454	Homo sapiens	0	1	0	1	2	2	2	2	0	0	3
3.00	mir-1299	Homo sapiens	0	0	0	0	0	2	0	2	1	1	3
3.00	mir-664a	Homo sapiens	0	1	0	1	0	1	0	1	1	1	3
3.00	mir-3137	Homo sapiens	0	0	0	0	0	0	0	0	2	3	3
3.00	mir-3177	Homo sapiens	0	0	0	0	2	3	2	3	0	0	3
3.00	mir-3679	Homo sapiens	0	2	0	2	0	0	0	0	0	1	3
3.00	mir-3908	Homo sapiens	0	0	0	0	0	0	0	0	0	3	3
3.00	mir-3911	Homo sapiens	0	2	0	2	0	0	0	0	1	1	3
3.00	mir-3936	Homo sapiens	0	0	0	0	0	0	0	0	0	3	3
3.00	mir-378h	Homo sapiens	0	3	0	3	0	0	0	0	0	0	3
3.00	mir-4466	Homo sapiens	0	3	0	3	0	0	0	0	0	0	3
3.00	mir-4510	Homo sapiens	0	2	0	0	0	0	0	0	0	1	3
3.00	mir-4516	Homo sapiens	0	3	0	3	0	0	0	0	0	0	3
3.00	mir-4752	Homo sapiens	0	0	0	0	0	0	0	0	0	3	3
3.00	mir-5001	Homo sapiens	0	0	0	0	0	3	0	3	0	0	3
3.00	mir-6515	Homo sapiens	2	2	2	2	0	1	0	1	0	0	3
3.00	mir-6793	Homo sapiens	0	3	0	3	0	0	0	0	0	0	3
3.00	mir-7110	Homo sapiens	0	0	0	0	0	0	0	0	0	3	3
3.00	mir-3690-2	Homo sapiens	0	0	0	0	0	0	0	0	3	3	3
3.00	mir-10399	Homo sapiens	0	0	0	0	0	0	0	0	3	3	3
3.00	mir-12136	Homo sapiens	0	1	0	1	0	0	0	0	0	2	3
2.00	mir-15a	Homo sapiens	0	0	0	0	0	0	0	0	0	2	2
2.00	mir-19b-2	Homo sapiens	0	0	0	0	0	2	0	0	0	0	2
2.00	mir-33a	Homo sapiens	0	2	0	2	0	0	0	0	0	0	2
2.00	mir-93	Homo sapiens	0	0	0	0	0	2	0	2	0	0	2
2.00	mir-103a-1	Homo sapiens	0	0	0	0	0	0	0	0	2	2	2
2.00	mir-181c	Homo sapiens	0	0	0	0	0	2	0	2	0	0	2
2.00	mir-187	Homo sapiens	0	0	0	0	0	1	0	1	1	1	2
2.00	mir-219a-1	Homo sapiens	0	0	0	0	0	0	0	0	2	2	2
2.00	mir-130b	Homo sapiens	0	2	0	2	0	0	0	0	0	0	2
2.00	mir-365a	Homo sapiens	0	1	0	1	0	1	0	0	0	0	2
2.00	mir-331	Homo sapiens	0	2	0	2	0	0	0	0	0	0	2
2.00	mir-338	Homo sapiens	0	2	0	2	0	0	0	0	0	0	2
2.00	mir-384	Homo sapiens	0	0	0	0	0	0	0	0	0	2	2
2.00	mir-193b	Homo sapiens	0	1	0	1	1	1	1	1	0	0	2
2.00	mir-556	Homo sapiens	0	2	0	2	0	0	0	0	0	0	2
2.00	mir-548b	Homo sapiens	0	2	0	2	0	0	0	0	0	0	2
2.00	mir-320c-1	Homo sapiens	0	0	0	0	0	2	0	0	0	0	2
2.00	mir-2113	Homo sapiens	0	0	0	0	0	2	0	2	0	0	2
2.00	mir-548f-2	Homo sapiens	0	0	0	0	0	2	0	0	0	0	2
2.00	mir-1284	Homo sapiens	1	2	1	2	0	0	0	0	0	0	2
2.00	mir-548u	Homo sapiens	0	0	0	0	0	2	0	2	0	0	2
2.00	mir-3157	Homo sapiens	0	0	0	0	2	2	2	2	0	0	2
2.00	mir-3164	Homo sapiens	0	0	0	0	0	0	0	0	0	2	2
2.00	mir-3175	Homo sapiens	2	2	2	2	0	0	0	0	0	0	2
2.00	mir-3664	Homo sapiens	0	1	0	1	0	0	0	0	0	1	2
2.00	mir-3690-1	Homo sapiens	0	0	0	0	0	0	0	0	2	2	2
2.00	mir-3912	Homo sapiens	0	0	0	0	2	2	2	2	0	0	2
2.00	mir-378g	Homo sapiens	0	2	0	2	0	0	0	0	0	0	2
2.00	mir-4512	Homo sapiens	0	0	0	0	0	0	0	0	0	2	2
2.00	mir-4645	Homo sapiens	0	0	0	0	0	2	0	2	0	0	2
2.00	mir-1343	Homo sapiens	0	0	0	0	0	2	0	2	0	0	2
2.00	mir-4767	Homo sapiens	0	0	0	0	0	0	0	0	0	2	2
2.00	mir-5787	Homo sapiens	0	2	0	2	0	0	0	0	0	0	2
2.00	mir-6127	Homo sapiens	0	0	0	0	0	0	0	0	0	2	2
2.00	mir-6761	Homo sapiens	0	2	0	2	0	0	0	0	0	0	2
2.00	mir-6808	Homo sapiens	0	0	0	0	0	2	0	2	0	0	2
2.00	mir-6516	Homo sapiens	0	0	0	0	0	2	0	2	0	0	2
2.00	mir-9902-1	Homo sapiens	0	0	0	0	0	0	0	0	0	2	2
2.00	mir-10396a	Homo sapiens	1	2	1	2	0	0	0	0	0	0	2
2.00	mir-9902-2	Homo sapiens	0	0	0	0	0	0	0	0	1	2	2
1.00	mir-18a	Homo sapiens	0	0	0	0	0	1	0	1	0	0	1
1.00	mir-139	Homo sapiens	1	1	1	1	0	0	0	0	0	0	1
1.00	mir-122	Homo sapiens	1	1	1	1	0	0	0	0	0	0	1
1.00	mir-135a-1	Homo sapiens	1	1	0	0	0	0	0	0	0	0	1
1.00	mir-145	Homo sapiens	0	0	0	0	0	1	0	1	0	0	1
1.00	mir-296	Homo sapiens	0	0	0	0	0	1	0	1	0	0	1
1.00	mir-365b	Homo sapiens	0	1	0	1	0	0	0	0	0	0	1
1.00	mir-370	Homo sapiens	0	0	0	0	0	1	0	1	0	0	1
1.00	mir-381	Homo sapiens	0	0	0	0	1	1	1	1	0	0	1
1.00	mir-450a-2	Homo sapiens	0	1	0	0	0	0	0	0	0	0	1
1.00	mir-503	Homo sapiens	0	0	0	0	0	0	0	0	1	1	1
1.00	mir-506	Homo sapiens	0	0	0	0	0	1	0	1	0	0	1
1.00	mir-514a-1	Homo sapiens	0	0	0	0	1	1	0	0	0	0	1
1.00	mir-514a-2	Homo sapiens	0	0	0	0	0	1	0	0	0	0	1
1.00	mir-514a-3	Homo sapiens	0	0	0	0	1	1	0	0	0	0	1
1.00	mir-548a-1	Homo sapiens	0	0	0	0	0	1	0	0	0	0	1
1.00	mir-548a-2	Homo sapiens	0	0	0	0	0	1	0	0	0	0	1
1.00	mir-590	Homo sapiens	0	0	0	0	1	1	1	1	0	0	1
1.00	mir-597	Homo sapiens	0	0	0	0	0	0	0	0	1	1	1
1.00	mir-548a-3	Homo sapiens	0	0	0	0	0	1	0	0	0	0	1
1.00	mir-632	Homo sapiens	0	0	0	0	0	1	0	1	0	0	1
1.00	mir-642a	Homo sapiens	0	1	0	1	0	0	0	0	0	0	1
1.00	mir-548d-1	Homo sapiens	0	1	0	0	0	0	0	0	0	0	1
1.00	mir-1271	Homo sapiens	0	1	0	1	0	0	0	0	0	0	1
1.00	mir-873	Homo sapiens	0	0	0	0	0	1	0	1	0	0	1
1.00	mir-509-3	Homo sapiens	0	1	0	1	0	0	0	0	0	0	1
1.00	mir-942	Homo sapiens	0	1	0	1	0	0	0	0	0	0	1
1.00	mir-1289-1	Homo sapiens	0	0	0	0	0	0	0	0	0	1	1
1.00	mir-1291	Homo sapiens	0	1	0	1	0	0	0	0	0	0	1
1.00	mir-548k	Homo sapiens	0	1	0	1	0	0	0	0	0	0	1
1.00	mir-1294	Homo sapiens	0	1	0	1	0	0	0	0	0	0	1
1.00	mir-548f-1	Homo sapiens	0	1	0	1	0	0	0	0	0	0	1
1.00	mir-548f-3	Homo sapiens	0	0	0	0	0	1	0	0	0	0	1
1.00	mir-1257	Homo sapiens	0	0	0	0	0	0	0	0	0	1	1
1.00	mir-1260a	Homo sapiens	0	1	0	1	0	0	0	0	0	0	1
1.00	mir-548g	Homo sapiens	0	0	0	0	0	1	0	1	0	0	1
1.00	mir-548n	Homo sapiens	0	1	0	1	0	0	0	0	0	0	1
1.00	mir-320d-1	Homo sapiens	0	0	0	0	0	1	0	0	0	0	1
1.00	mir-320d-2	Homo sapiens	0	0	0	0	0	1	0	0	0	0	1
1.00	mir-1910	Homo sapiens	0	1	0	1	0	0	0	0	0	0	1
1.00	mir-1972-1	Homo sapiens	0	0	0	0	0	0	0	0	0	1	1
1.00	mir-2115	Homo sapiens	0	1	0	1	0	0	0	0	0	0	1
1.00	mir-2277	Homo sapiens	0	1	0	1	0	0	0	0	0	0	1
1.00	mir-2861	Homo sapiens	0	0	0	0	0	0	0	0	0	1	1
1.00	mir-3124	Homo sapiens	0	1	0	1	0	0	0	0	0	0	1
1.00	mir-3125	Homo sapiens	0	0	0	0	0	0	0	0	0	1	1
1.00	mir-3150a	Homo sapiens	1	1	1	1	0	0	0	0	0	0	1
1.00	mir-3180-2	Homo sapiens	0	0	0	0	0	0	0	0	0	1	1
1.00	mir-3180-3	Homo sapiens	0	0	0	0	0	0	0	0	1	1	1
1.00	mir-3065	Homo sapiens	0	1	0	1	0	0	0	0	0	0	1
1.00	mir-3186	Homo sapiens	1	1	1	1	0	0	0	0	0	0	1
1.00	mir-548x	Homo sapiens	0	1	0	0	0	0	0	0	0	0	1
1.00	mir-3681	Homo sapiens	0	1	0	1	0	0	0	0	0	0	1
1.00	mir-3684	Homo sapiens	0	0	0	0	0	0	0	0	0	1	1
1.00	mir-3180-5	Homo sapiens	0	1	0	0	0	0	0	0	0	0	1
1.00	mir-3918	Homo sapiens	0	1	0	1	0	0	0	0	0	0	1
1.00	mir-3934	Homo sapiens	0	1	0	1	0	0	0	0	0	0	1
1.00	mir-378f	Homo sapiens	0	0	0	0	0	1	0	1	0	0	1
1.00	mir-4425	Homo sapiens	0	0	0	0	1	1	1	1	0	0	1
1.00	mir-4448	Homo sapiens	0	0	0	0	0	0	0	0	0	1	1
1.00	mir-548ah	Homo sapiens	0	1	0	1	0	0	0	0	0	0	1
1.00	mir-4452	Homo sapiens	0	0	0	0	0	0	0	0	0	1	1
1.00	mir-548aj-2	Homo sapiens	0	1	0	0	0	0	0	0	0	0	1
1.00	mir-4496	Homo sapiens	0	0	0	0	0	0	0	0	0	1	1
1.00	mir-4508	Homo sapiens	0	1	0	1	0	0	0	0	0	0	1
1.00	mir-4636	Homo sapiens	1	1	1	1	0	0	0	0	0	0	1
1.00	mir-4668	Homo sapiens	0	1	0	1	0	0	0	0	0	0	1
1.00	mir-3529	Homo sapiens	0	0	0	0	0	0	0	0	1	1	1
1.00	mir-4724	Homo sapiens	0	1	0	1	0	0	0	0	0	0	1
1.00	mir-4746	Homo sapiens	0	1	0	1	0	0	0	0	0	0	1
1.00	mir-4786	Homo sapiens	1	1	1	1	0	0	0	0	0	0	1
1.00	mir-4787	Homo sapiens	0	0	0	0	0	1	0	1	0	0	1
1.00	mir-4799	Homo sapiens	0	0	0	0	0	0	0	0	0	1	1
1.00	mir-5009	Homo sapiens	0	1	0	1	0	0	0	0	0	0	1
1.00	mir-5090	Homo sapiens	0	1	0	1	0	0	0	0	0	0	1
1.00	mir-5571	Homo sapiens	0	0	0	0	0	0	0	0	0	1	1
1.00	mir-5585	Homo sapiens	0	0	0	0	0	1	0	1	0	0	1
1.00	mir-5588	Homo sapiens	0	0	0	0	0	0	0	0	0	1	1
1.00	mir-5699	Homo sapiens	0	0	0	0	0	1	0	1	0	0	1
1.00	mir-548az	Homo sapiens	0	1	0	1	0	0	0	0	0	0	1
1.00	mir-6511a-1	Homo sapiens	0	0	0	0	0	1	0	0	0	0	1
1.00	mir-6511b-1	Homo sapiens	0	0	0	0	0	1	0	0	0	0	1
1.00	mir-6764	Homo sapiens	1	1	1	1	0	0	0	0	0	0	1
1.00	mir-6765	Homo sapiens	0	1	0	1	0	0	0	0	0	0	1
1.00	mir-6774	Homo sapiens	0	0	0	0	0	0	0	0	1	1	1
1.00	mir-6812	Homo sapiens	0	0	0	0	0	1	0	1	0	0	1
1.00	mir-6814	Homo sapiens	0	0	0	0	0	0	0	0	1	1	1
1.00	mir-6817	Homo sapiens	0	0	0	0	1	1	1	1	0	0	1
1.00	mir-6855	Homo sapiens	0	1	0	1	0	0	0	0	0	0	1
1.00	mir-6861	Homo sapiens	0	0	0	0	0	0	0	0	0	1	1
1.00	mir-6868	Homo sapiens	0	0	0	0	0	1	0	1	0	0	1
1.00	mir-6873	Homo sapiens	0	0	0	0	0	0	0	0	0	1	1
1.00	mir-6891	Homo sapiens	0	1	0	1	0	0	0	0	0	0	1
1.00	mir-6511a-3	Homo sapiens	0	0	0	0	0	0	0	0	1	1	1
1.00	mir-7847	Homo sapiens	0	0	0	0	0	0	0	0	0	1	1
1.00	mir-7854	Homo sapiens	0	0	0	0	1	1	1	1	0	0	1
1.00	mir-10401	Homo sapiens	0	0	0	0	0	0	0	0	1	1	1
0.00	mir-203a	Homo sapiens	0	0	0	0	0	0	0	0	0	0	0
0.00	mir-135a-2	Homo sapiens	0	0	0	0	0	0	0	0	0	0	0
0.00	mir-1181	Homo sapiens	0	0	0	0	0	0	0	0	0	0	0
0.00	mir-3180-1	Homo sapiens	0	0	0	0	0	0	0	0	0	0	0
0.00	mir-1972-2	Homo sapiens	0	0	0	0	0	0	0	0	0	0	0
0.00	mir-3180-4	Homo sapiens	0	0	0	0	0	0	0	0	0	0	0
0.00	mir-5708	Homo sapiens	0	0	0	0	0	0	0	0	0	0	0
0.00	mir-6125	Homo sapiens	0	0	0	0	0	0	0	0	0	0	0
0.00	mir-6511b-2	Homo sapiens	0	0	0	0	0	0	0	0	0	0	0
0.00	mir-6511a-2	Homo sapiens	0	0	0	0	0	0	0	0	0	0	0
0.00	mir-6511a-4	Homo sapiens	0	0	0	0	0	0	0	0	0	0	0

## Sheet: 15A
Expression values	Name	Resource	Exact mature 5'	Mature 5'	Unique exact mature 5'	Unique mature 5'	Exact mature 3'	Mature 3'	Unique exact mature 3'	Unique mature 3'	Exact other	Other	Total
11,431.00	mir-99a	Homo sapiens	152	11402	152	11388	0	1	0	1	28	28	11431
10,924.00	mir-21	Homo sapiens	3824	10551	3824	10551	2	2	2	2	329	371	10924
10,487.00	mir-34c	Homo sapiens	1363	9335	1363	9335	193	359	193	359	747	793	10487
3,601.00	let-7b	Homo sapiens	1270	3134	1270	3133	0	1	0	1	443	466	3601
2,944.00	let-7i	Homo sapiens	2243	2854	2243	2849	0	0	0	0	81	90	2944
2,498.00	mir-3074	Homo sapiens	0	2464	0	2464	0	34	0	34	0	0	2498
2,350.00	mir-30d	Homo sapiens	377	2239	377	2236	0	4	0	4	91	107	2350
1,202.00	let-7c	Homo sapiens	787	1160	787	1154	0	0	0	0	37	42	1202
1,045.00	mir-26a-1	Homo sapiens	805	1041	0	0	0	0	0	0	3	4	1045
1,032.00	mir-26a-2	Homo sapiens	806	1027	0	0	0	1	0	1	4	4	1032
778.00	let-7g	Homo sapiens	237	770	237	764	0	0	0	0	7	8	778
704.00	mir-205	Homo sapiens	189	702	189	702	0	0	0	0	2	2	704
696.00	mir-146a	Homo sapiens	281	696	281	692	0	0	0	0	0	0	696
916.00	mir-423	Homo sapiens	251	618	251	618	107	228	107	228	61	70	916
609.00	mir-30a	Homo sapiens	126	476	126	472	21	82	21	77	46	51	609
467.00	let-7f-2	Homo sapiens	55	455	0	68	0	0	0	0	10	12	467
432.00	mir-100	Homo sapiens	11	429	11	417	0	0	0	0	3	3	432
411.00	let-7f-1	Homo sapiens	55	391	0	5	1	7	1	7	13	13	411
395.00	let-7a-2	Homo sapiens	41	366	0	0	0	0	0	0	23	29	395
405.00	let-7a-1	Homo sapiens	41	363	0	0	1	10	0	0	24	32	405
404.00	let-7a-3	Homo sapiens	42	358	0	0	1	11	0	0	27	35	404
7,780.00	mir-200a	Homo sapiens	155	348	155	348	6	7370	6	7359	60	62	7780
341.00	mir-203b	Homo sapiens	0	341	0	341	0	0	0	0	0	0	341
322.00	mir-146b	Homo sapiens	182	318	182	314	0	3	0	3	1	1	322
271.00	mir-183	Homo sapiens	147	270	147	270	0	0	0	0	0	1	271
230.00	mir-26b	Homo sapiens	85	229	85	229	0	1	0	1	0	0	230
230.00	mir-191	Homo sapiens	118	221	118	221	0	4	0	4	5	5	230
281.00	mir-181a-1	Homo sapiens	10	218	0	0	0	0	0	0	54	63	281
270.00	mir-181a-2	Homo sapiens	9	209	0	0	0	4	0	4	52	57	270
232.00	mir-182	Homo sapiens	12	193	12	193	0	3	0	3	33	36	232
210.00	mir-99b	Homo sapiens	29	182	29	181	16	26	16	26	1	2	210
284.00	mir-30e	Homo sapiens	27	179	27	178	24	62	24	59	37	43	284
161.00	mir-186	Homo sapiens	48	159	48	159	0	0	0	0	2	2	161
156.00	mir-125a	Homo sapiens	4	134	4	134	0	2	0	2	19	20	156
137.00	mir-449a	Homo sapiens	68	131	68	130	0	0	0	0	5	6	137
134.00	mir-744	Homo sapiens	13	131	13	131	0	2	0	2	0	1	134
835.00	mir-22	Homo sapiens	4	125	4	125	361	677	361	677	31	33	835
139.00	mir-2110	Homo sapiens	23	105	23	105	0	0	0	0	11	34	139
102.00	mir-340	Homo sapiens	66	95	66	95	2	7	2	7	0	0	102
90.00	mir-532	Homo sapiens	62	90	62	90	0	0	0	0	0	0	90
97.00	mir-449c	Homo sapiens	15	90	15	90	0	0	0	0	0	7	97
108.00	mir-125b-1	Homo sapiens	12	89	0	1	0	9	0	9	9	10	108
106.00	mir-125b-2	Homo sapiens	13	82	0	0	0	13	0	13	11	11	106
5,817.00	mir-200b	Homo sapiens	19	80	19	80	514	5711	514	5702	12	26	5817
66.00	mir-135b	Homo sapiens	52	65	52	65	0	0	0	0	1	1	66
79.00	let-7d	Homo sapiens	0	64	0	63	0	7	0	7	6	8	79
61.00	mir-190b	Homo sapiens	23	61	23	61	0	0	0	0	0	0	61
83.00	mir-192	Homo sapiens	12	58	12	58	0	0	0	0	16	25	83
86.00	mir-224	Homo sapiens	0	56	0	56	0	2	0	2	27	28	86
82.00	mir-342	Homo sapiens	17	52	17	52	4	30	4	30	0	0	82
51.00	mir-10400	Homo sapiens	0	51	0	51	0	0	0	0	0	0	51
65.00	mir-98	Homo sapiens	29	49	29	47	0	0	0	0	13	16	65
877.00	mir-92b	Homo sapiens	0	46	0	46	173	720	173	703	81	111	877
108.00	mir-28	Homo sapiens	4	39	4	39	21	67	21	67	2	2	108
37.00	mir-16-1	Homo sapiens	10	37	0	0	0	0	0	0	0	0	37
65.00	mir-16-2	Homo sapiens	9	37	0	0	3	27	3	27	1	1	65
35.00	mir-345	Homo sapiens	18	35	18	35	0	0	0	0	0	0	35
33.00	mir-218-1	Homo sapiens	18	33	0	0	0	0	0	0	0	0	33
33.00	mir-218-2	Homo sapiens	17	33	0	0	0	0	0	0	0	0	33
34.00	mir-32	Homo sapiens	17	29	17	29	0	5	0	5	0	0	34
29.00	mir-499a	Homo sapiens	4	29	4	29	0	0	0	0	0	0	29
146.00	mir-140	Homo sapiens	12	28	12	28	21	98	21	98	5	20	146
81.00	mir-24-2	Homo sapiens	0	26	0	26	0	52	0	0	3	3	81
725.00	mir-34b	Homo sapiens	0	25	0	25	10	698	10	698	1	2	725
29.00	mir-1843	Homo sapiens	0	25	0	25	0	0	0	0	0	4	29
25.00	mir-769	Homo sapiens	11	24	11	24	0	0	0	0	1	1	25
23.00	mir-103b-2	Homo sapiens	7	22	0	0	0	0	0	0	1	1	23
29.00	mir-30c-2	Homo sapiens	12	21	0	0	0	0	0	0	7	8	29
123.00	mir-142	Homo sapiens	1	21	1	21	1	12	1	12	81	90	123
54.00	mir-181b-2	Homo sapiens	4	21	0	0	0	0	0	0	31	33	54
31.00	mir-30c-1	Homo sapiens	12	21	0	0	1	1	1	1	8	9	31
28.00	mir-425	Homo sapiens	4	21	4	21	0	4	0	4	2	3	28
22.00	mir-455	Homo sapiens	2	21	2	21	0	0	0	0	0	1	22
23.00	mir-103b-1	Homo sapiens	7	21	0	0	0	0	0	0	1	2	23
86.00	mir-3184	Homo sapiens	0	21	0	21	0	0	0	0	59	65	86
20.00	mir-30b	Homo sapiens	1	20	1	20	0	0	0	0	0	0	20
20.00	mir-1246	Homo sapiens	0	20	0	20	0	0	0	0	0	0	20
20.00	mir-642b	Homo sapiens	12	20	12	20	0	0	0	0	0	0	20
51.00	mir-181b-1	Homo sapiens	4	18	0	0	0	0	0	0	29	33	51
21.00	mir-625	Homo sapiens	0	18	0	18	0	3	0	3	0	0	21
18.00	mir-374a	Homo sapiens	0	17	0	17	0	0	0	0	1	1	18
20.00	let-7e	Homo sapiens	2	16	2	15	0	2	0	2	2	2	20
3,455.00	mir-27a	Homo sapiens	0	16	0	16	11	3435	11	3409	2	4	3455
16.00	mir-96	Homo sapiens	7	16	7	16	0	0	0	0	0	0	16
3,275.00	mir-151a	Homo sapiens	9	15	9	15	2025	3211	2025	3211	21	49	3275
16.00	mir-7-3	Homo sapiens	10	14	0	0	0	0	0	0	2	2	16
96.00	mir-23b	Homo sapiens	0	14	0	14	1	39	1	39	27	43	96
14.00	mir-451a	Homo sapiens	0	14	0	14	0	0	0	0	0	0	14
70.00	mir-24-1	Homo sapiens	0	13	0	13	0	56	0	0	1	1	70
16.00	mir-7-1	Homo sapiens	10	13	0	0	1	1	1	1	2	2	16
15.00	mir-7-2	Homo sapiens	10	13	0	0	0	0	0	0	2	2	15
13.00	mir-150	Homo sapiens	7	13	7	13	0	0	0	0	0	0	13
37.00	mir-132	Homo sapiens	0	12	0	12	2	22	2	22	2	3	37
370.00	mir-141	Homo sapiens	8	12	8	12	0	325	0	315	26	33	370
23.00	mir-149	Homo sapiens	2	12	2	12	0	0	0	0	10	11	23
16.00	mir-155	Homo sapiens	0	12	0	12	0	0	0	0	4	4	16
12.00	mir-194-2	Homo sapiens	0	12	0	0	0	0	0	0	0	0	12
12.00	mir-378i	Homo sapiens	0	12	0	12	0	0	0	0	0	0	12
11.00	mir-185	Homo sapiens	0	11	0	11	0	0	0	0	0	0	11
11.00	mir-194-1	Homo sapiens	0	11	0	0	0	0	0	0	0	0	11
232.00	mir-361	Homo sapiens	5	11	5	11	22	209	22	209	12	12	232
10.00	mir-511	Homo sapiens	9	10	9	10	0	0	0	0	0	0	10
10.00	mir-629	Homo sapiens	6	10	6	10	0	0	0	0	0	0	10
24,990.00	mir-148a	Homo sapiens	6	9	6	9	22314	24951	22314	24924	28	30	24990
21.00	mir-628	Homo sapiens	6	9	6	9	3	12	3	12	0	0	21
9.00	mir-660	Homo sapiens	3	9	3	9	0	0	0	0	0	0	9
9.00	mir-3613	Homo sapiens	7	9	7	9	0	0	0	0	0	0	9
10.00	mir-3135b	Homo sapiens	0	9	0	9	0	0	0	0	0	1	10
20.00	mir-9-2	Homo sapiens	1	8	0	0	1	3	0	0	9	9	20
20.00	mir-29c	Homo sapiens	0	8	0	8	0	9	0	8	3	3	20
11.00	mir-330	Homo sapiens	0	8	0	8	0	3	0	3	0	0	11
8.00	mir-181d	Homo sapiens	5	8	5	8	0	0	0	0	0	0	8
9.00	mir-449b	Homo sapiens	3	8	3	6	1	1	1	1	0	0	9
8.00	mir-374b	Homo sapiens	3	8	3	8	0	0	0	0	0	0	8
9.00	mir-34a	Homo sapiens	1	7	1	7	0	0	0	0	1	2	9
52.00	mir-223	Homo sapiens	0	7	0	7	8	44	8	44	1	1	52
21.00	mir-9-1	Homo sapiens	1	7	0	0	2	3	0	0	10	11	21
8.00	mir-193a	Homo sapiens	2	7	2	7	0	0	0	0	1	1	8
7.00	mir-548b	Homo sapiens	0	7	0	7	0	0	0	0	0	0	7
33.00	mir-708	Homo sapiens	1	7	1	7	0	24	0	24	2	2	33
6.00	mir-31	Homo sapiens	1	6	1	6	0	0	0	0	0	0	6
7.00	mir-484	Homo sapiens	0	6	0	6	0	0	0	0	1	1	7
54.00	mir-1307	Homo sapiens	4	6	4	6	0	48	0	48	0	0	54
6.00	mir-3158-2	Homo sapiens	0	6	0	0	0	0	0	0	0	0	6
7.00	mir-10a	Homo sapiens	1	5	1	5	0	0	0	0	2	2	7
70.00	mir-221	Homo sapiens	0	5	0	5	6	59	6	59	4	6	70
14.00	mir-452	Homo sapiens	3	5	3	5	0	0	0	0	7	9	14
5.00	mir-509-3	Homo sapiens	3	5	3	5	0	0	0	0	0	0	5
5.00	mir-1287	Homo sapiens	3	5	3	5	0	0	0	0	0	0	5
5.00	mir-9985	Homo sapiens	0	5	0	5	0	0	0	0	0	0	5
4.00	mir-204	Homo sapiens	2	4	2	4	0	0	0	0	0	0	4
17.00	mir-9-3	Homo sapiens	1	4	0	0	1	3	0	0	9	10	17
28.00	mir-106b	Homo sapiens	0	4	0	4	8	18	8	18	5	6	28
28.00	mir-339	Homo sapiens	2	4	2	4	1	22	1	22	2	2	28
4.00	mir-651	Homo sapiens	0	4	0	4	0	0	0	0	0	0	4
4.00	mir-3158-1	Homo sapiens	0	4	0	0	0	0	0	0	0	0	4
4.00	mir-4661	Homo sapiens	1	4	1	4	0	0	0	0	0	0	4
4.00	mir-486-2	Homo sapiens	0	4	0	0	0	0	0	0	0	0	4
4.00	mir-10527	Homo sapiens	3	4	3	4	0	0	0	0	0	0	4
57.00	mir-23a	Homo sapiens	0	3	0	3	0	51	0	51	1	3	57
202.00	mir-148b	Homo sapiens	0	3	0	3	97	198	97	170	0	1	202
3.00	mir-331	Homo sapiens	0	3	0	3	0	0	0	0	0	0	3
3.00	mir-338	Homo sapiens	0	3	0	3	0	0	0	0	0	0	3
3.00	mir-589	Homo sapiens	0	3	0	3	0	0	0	0	0	0	3
3.00	mir-659	Homo sapiens	2	3	2	3	0	0	0	0	0	0	3
3.00	mir-934	Homo sapiens	0	3	0	3	0	0	0	0	0	0	3
3.00	mir-548i-2	Homo sapiens	1	3	0	0	0	0	0	0	0	0	3
2.00	mir-20a	Homo sapiens	1	2	1	2	0	0	0	0	0	0	2
339.00	mir-25	Homo sapiens	0	2	0	2	191	334	191	334	3	3	339
3.00	mir-324	Homo sapiens	2	2	2	2	0	0	0	0	0	1	3
2.00	mir-20b	Homo sapiens	1	2	1	2	0	0	0	0	0	0	2
2.00	mir-486-1	Homo sapiens	0	2	0	0	0	0	0	0	0	0	2
7.00	mir-193b	Homo sapiens	0	2	0	2	4	5	4	5	0	0	7
2.00	mir-551b	Homo sapiens	2	2	2	2	0	0	0	0	0	0	2
2.00	mir-618	Homo sapiens	2	2	2	2	0	0	0	0	0	0	2
2.00	mir-1296	Homo sapiens	2	2	2	2	0	0	0	0	0	0	2
2.00	mir-548l	Homo sapiens	0	2	0	2	0	0	0	0	0	0	2
2.00	mir-1262	Homo sapiens	1	2	1	2	0	0	0	0	0	0	2
2.00	mir-548i-3	Homo sapiens	0	2	0	0	0	0	0	0	0	0	2
2.00	mir-4286	Homo sapiens	0	2	0	2	0	0	0	0	0	0	2
2.00	mir-4423	Homo sapiens	1	2	1	2	0	0	0	0	0	0	2
2.00	mir-4652	Homo sapiens	0	2	0	2	0	0	0	0	0	0	2
2.00	mir-4776-1	Homo sapiens	1	2	0	0	0	0	0	0	0	0	2
2.00	mir-1295b	Homo sapiens	1	2	1	2	0	0	0	0	0	0	2
1.00	mir-15a	Homo sapiens	0	1	0	1	0	0	0	0	0	0	1
1.00	mir-181c	Homo sapiens	0	1	0	1	0	0	0	0	0	0	1
1.00	mir-196a-2	Homo sapiens	0	1	0	0	0	0	0	0	0	0	1
1.00	mir-301a	Homo sapiens	0	1	0	1	0	0	0	0	0	0	1
4.00	mir-335	Homo sapiens	0	1	0	1	2	3	2	3	0	0	4
1.00	mir-504	Homo sapiens	1	1	1	1	0	0	0	0	0	0	1
3.00	mir-505	Homo sapiens	0	1	0	1	0	2	0	2	0	0	3
2.00	mir-556	Homo sapiens	0	1	0	1	0	1	0	1	0	0	2
6.00	mir-619	Homo sapiens	0	1	0	1	0	0	0	0	2	5	6
1.00	mir-641	Homo sapiens	0	1	0	1	0	0	0	0	0	0	1
1.00	mir-642a	Homo sapiens	0	1	0	1	0	0	0	0	0	0	1
11.00	mir-671	Homo sapiens	0	1	0	1	1	10	1	10	0	0	11
1.00	mir-1468	Homo sapiens	0	1	0	1	0	0	0	0	0	0	1
1.00	mir-509-2	Homo sapiens	0	1	0	0	0	0	0	0	0	0	1
3.00	mir-877	Homo sapiens	0	1	0	1	0	1	0	1	0	1	3
8.00	mir-1285-1	Homo sapiens	0	1	0	1	0	0	0	0	0	7	8
1.00	mir-1260a	Homo sapiens	0	1	0	1	0	0	0	0	0	0	1
2.00	mir-548g	Homo sapiens	0	1	0	0	0	1	0	1	0	0	2
1.00	mir-548n	Homo sapiens	0	1	0	0	0	0	0	0	0	0	1
1.00	mir-1284	Homo sapiens	0	1	0	1	0	0	0	0	0	0	1
1.00	mir-2277	Homo sapiens	0	1	0	1	0	0	0	0	0	0	1
1.00	mir-3128	Homo sapiens	0	1	0	1	0	0	0	0	0	0	1
1.00	mir-1260b	Homo sapiens	0	1	0	1	0	0	0	0	0	0	1
2.00	mir-4326	Homo sapiens	0	1	0	1	0	0	0	0	1	1	2
1.00	mir-3617	Homo sapiens	1	1	1	1	0	0	0	0	0	0	1
2.00	mir-3913-1	Homo sapiens	0	1	0	0	0	0	0	0	0	1	2
1.00	mir-3913-2	Homo sapiens	0	1	0	0	0	0	0	0	0	0	1
1.00	mir-3944	Homo sapiens	0	1	0	1	0	0	0	0	0	0	1
1.00	mir-4429	Homo sapiens	0	1	0	1	0	0	0	0	0	0	1
1.00	mir-548ak	Homo sapiens	0	1	0	1	0	0	0	0	0	0	1
1.00	mir-4510	Homo sapiens	0	1	0	0	0	0	0	0	0	0	1
1.00	mir-4659a	Homo sapiens	0	1	0	1	0	0	0	0	0	0	1
1.00	mir-4662a	Homo sapiens	1	1	1	1	0	0	0	0	0	0	1
2.00	mir-4677	Homo sapiens	0	1	0	1	0	1	0	1	0	0	2
1.00	mir-6884	Homo sapiens	0	1	0	1	0	0	0	0	0	0	1
1.00	mir-7704	Homo sapiens	0	1	0	1	0	0	0	0	0	0	1
1.00	mir-6516	Homo sapiens	0	1	0	1	0	0	0	0	0	0	1
1.00	mir-9902-2	Homo sapiens	0	1	0	0	0	0	0	0	0	0	1
2.00	mir-18a	Homo sapiens	0	0	0	0	0	1	0	1	1	1	2
4.00	mir-19a	Homo sapiens	0	0	0	0	0	4	0	4	0	0	4
2.00	mir-19b-1	Homo sapiens	0	0	0	0	0	2	0	0	0	0	2
1.00	mir-19b-2	Homo sapiens	0	0	0	0	0	1	0	0	0	0	1
656.00	mir-29a	Homo sapiens	0	0	0	0	26	577	26	577	72	79	656
72.00	mir-92a-1	Homo sapiens	0	0	0	0	22	72	0	14	0	0	72
54.00	mir-92a-2	Homo sapiens	0	0	0	0	22	54	0	0	0	0	54
22.00	mir-95	Homo sapiens	0	0	0	0	2	22	2	22	0	0	22
118.00	mir-101-1	Homo sapiens	0	0	0	0	13	115	0	1	1	3	118
16.00	mir-29b-1	Homo sapiens	0	0	0	0	1	7	0	0	8	9	16
16.00	mir-29b-2	Homo sapiens	0	0	0	0	1	6	0	0	10	10	16
1.00	mir-103a-2	Homo sapiens	0	0	0	0	0	0	0	0	1	1	1
1.00	mir-103a-1	Homo sapiens	0	0	0	0	0	0	0	0	1	1	1
1.00	mir-107	Homo sapiens	0	0	0	0	0	0	0	0	1	1	1
0.00	mir-196a-1	Homo sapiens	0	0	0	0	0	0	0	0	0	0	0
5.00	mir-197	Homo sapiens	0	0	0	0	2	5	2	5	0	0	5
1.00	mir-199a-1	Homo sapiens	0	0	0	0	0	1	0	0	0	0	1
5.00	mir-187	Homo sapiens	0	0	0	0	0	5	0	5	0	0	5
1.00	mir-199a-2	Homo sapiens	0	0	0	0	0	1	0	0	0	0	1
2.00	mir-199b	Homo sapiens	0	0	0	0	0	2	0	0	0	0	2
6.00	mir-210	Homo sapiens	0	0	0	0	0	5	0	5	0	1	6
1.00	mir-219a-1	Homo sapiens	0	0	0	0	0	0	0	0	0	1	1
205.00	mir-222	Homo sapiens	0	0	0	0	74	182	74	182	16	23	205
0.00	mir-1-2	Homo sapiens	0	0	0	0	0	0	0	0	0	0	0
1.00	mir-15b	Homo sapiens	0	0	0	0	0	0	0	0	1	1	1
3,851.00	mir-27b	Homo sapiens	0	0	0	0	203	3842	203	3820	0	9	3851
217.00	mir-128-1	Homo sapiens	0	0	0	0	66	217	0	67	0	0	217
49.00	mir-143	Homo sapiens	0	0	0	0	35	49	35	49	0	0	49
1.00	mir-144	Homo sapiens	0	0	0	0	1	1	1	1	0	0	1
1.00	mir-145	Homo sapiens	0	0	0	0	0	1	0	1	0	0	1
107.00	mir-152	Homo sapiens	0	0	0	0	19	107	19	107	0	0	107
1.00	mir-153-1	Homo sapiens	0	0	0	0	1	1	0	0	0	0	1
1.00	mir-153-2	Homo sapiens	0	0	0	0	0	1	0	0	0	0	1
3.00	mir-126	Homo sapiens	0	0	0	0	2	3	2	3	0	0	3
21.00	mir-184	Homo sapiens	0	0	0	0	17	21	17	21	0	0	21
1.00	mir-195	Homo sapiens	0	0	0	0	0	1	0	1	0	0	1
352.00	mir-320a	Homo sapiens	0	0	0	0	128	338	128	330	2	14	352
3,443.00	mir-200c	Homo sapiens	0	0	0	0	788	3353	788	3344	83	90	3443
1.00	mir-1-1	Homo sapiens	0	0	0	0	1	1	0	0	0	0	1
150.00	mir-128-2	Homo sapiens	0	0	0	0	67	150	0	1	0	0	150
135.00	mir-101-2	Homo sapiens	0	0	0	0	13	132	0	17	2	3	135
23.00	mir-363	Homo sapiens	0	0	0	0	15	23	15	23	0	0	23
1.00	mir-365a	Homo sapiens	0	0	0	0	0	1	0	0	0	0	1
1.00	mir-365b	Homo sapiens	0	0	0	0	0	1	0	0	0	0	1
1.00	mir-370	Homo sapiens	0	0	0	0	0	1	0	1	0	0	1
2,404.00	mir-375	Homo sapiens	0	0	0	0	521	2313	521	2313	82	91	2404
198.00	mir-378a	Homo sapiens	0	0	0	0	2	198	2	198	0	0	198
39.00	mir-328	Homo sapiens	0	0	0	0	18	39	18	39	0	0	39
1.00	mir-424	Homo sapiens	0	0	0	0	0	1	0	1	0	0	1
1,279.00	mir-429	Homo sapiens	0	0	0	0	494	1258	494	1258	19	21	1279
2.00	mir-500a	Homo sapiens	0	0	0	0	0	2	0	2	0	0	2
9.00	mir-501	Homo sapiens	0	0	0	0	1	9	1	9	0	0	9
3.00	mir-502	Homo sapiens	0	0	0	0	2	3	2	3	0	0	3
2.00	mir-450a-2	Homo sapiens	0	0	0	0	0	1	0	1	0	1	2
2.00	mir-506	Homo sapiens	0	0	0	0	0	2	0	2	0	0	2
0.00	mir-509-1	Homo sapiens	0	0	0	0	0	0	0	0	0	0	0
10.00	mir-514a-1	Homo sapiens	0	0	0	0	10	10	0	0	0	0	10
12.00	mir-514a-2	Homo sapiens	0	0	0	0	10	12	0	0	0	0	12
10.00	mir-514a-3	Homo sapiens	0	0	0	0	10	10	0	0	0	0	10
1.00	mir-551a	Homo sapiens	0	0	0	0	1	1	1	1	0	0	1
1.00	mir-561	Homo sapiens	0	0	0	0	0	0	0	0	1	1	1
35.00	mir-574	Homo sapiens	0	0	0	0	16	27	16	27	6	8	35
15.00	mir-582	Homo sapiens	0	0	0	0	9	15	9	15	0	0	15
0.00	mir-548a-1	Homo sapiens	0	0	0	0	0	0	0	0	0	0	0
1.00	mir-548a-2	Homo sapiens	0	0	0	0	0	1	0	0	0	0	1
1.00	mir-597	Homo sapiens	0	0	0	0	0	0	0	0	0	1	1
3.00	mir-598	Homo sapiens	0	0	0	0	0	2	0	2	0	1	3
1.00	mir-599	Homo sapiens	0	0	0	0	0	0	0	0	0	1	1
0.00	mir-548a-3	Homo sapiens	0	0	0	0	0	0	0	0	0	0	0
1.00	mir-607	Homo sapiens	0	0	0	0	0	1	0	1	0	0	1
1.00	mir-627	Homo sapiens	0	0	0	0	1	1	1	1	0	0	1
16.00	mir-652	Homo sapiens	0	0	0	0	6	16	6	16	0	0	16
1.00	mir-653	Homo sapiens	0	0	0	0	0	0	0	0	0	1	1
6.00	mir-421	Homo sapiens	0	0	0	0	0	6	0	6	0	0	6
6.00	mir-320b-1	Homo sapiens	0	0	0	0	0	6	0	0	0	0	6
3.00	mir-320c-1	Homo sapiens	0	0	0	0	2	3	0	0	0	0	3
14.00	mir-1301	Homo sapiens	0	0	0	0	2	11	2	11	1	3	14
6.00	mir-320b-2	Homo sapiens	0	0	0	0	0	6	0	0	0	0	6
1.00	mir-2113	Homo sapiens	0	0	0	0	0	1	0	1	0	0	1
8.00	mir-874	Homo sapiens	0	0	0	0	3	8	3	8	0	0	8
5.00	mir-147b	Homo sapiens	0	0	0	0	0	5	0	5	0	0	5
1.00	mir-543	Homo sapiens	0	0	0	0	1	1	1	1	0	0	1
2.00	mir-760	Homo sapiens	0	0	0	0	0	2	0	2	0	0	2
4.00	mir-941-1	Homo sapiens	0	0	0	0	2	4	0	0	0	0	4
2.00	mir-941-2	Homo sapiens	0	0	0	0	2	2	0	0	0	0	2
8.00	mir-941-3	Homo sapiens	0	0	0	0	2	8	0	0	0	0	8
4.00	mir-941-4	Homo sapiens	0	0	0	0	2	4	0	0	0	0	4
420.00	mir-1180	Homo sapiens	0	0	0	0	254	411	254	411	7	9	420
0.00	mir-1181	Homo sapiens	0	0	0	0	0	0	0	0	0	0	0
3.00	mir-1290	Homo sapiens	0	0	0	0	0	3	0	3	0	0	3
3.00	mir-1295a	Homo sapiens	0	0	0	0	3	3	3	3	0	0	3
4.00	mir-1303	Homo sapiens	0	0	0	0	1	3	1	3	1	1	4
1.00	mir-1268a	Homo sapiens	0	0	0	0	0	0	0	0	0	1	1
1.00	mir-1269a	Homo sapiens	0	0	0	0	0	0	0	0	1	1	1
0.00	mir-548i-1	Homo sapiens	0	0	0	0	0	0	0	0	0	0	0
0.00	mir-548i-4	Homo sapiens	0	0	0	0	0	0	0	0	0	0	0
2.00	mir-1288	Homo sapiens	0	0	0	0	2	2	2	2	0	0	2
1.00	mir-1292	Homo sapiens	0	0	0	0	0	0	0	0	1	1	1
10.00	mir-1306	Homo sapiens	0	0	0	0	0	5	0	5	3	5	10
1.00	mir-320d-1	Homo sapiens	0	0	0	0	1	1	0	0	0	0	1
2.00	mir-320c-2	Homo sapiens	0	0	0	0	1	2	0	0	0	0	2
0.00	mir-320d-2	Homo sapiens	0	0	0	0	0	0	0	0	0	0	0
1.00	mir-1910	Homo sapiens	0	0	0	0	0	1	0	1	0	0	1
1.00	mir-2278	Homo sapiens	0	0	0	0	0	0	0	0	1	1	1
2.00	mir-3127	Homo sapiens	0	0	0	0	0	2	0	2	0	0	2
1.00	mir-3135a	Homo sapiens	0	0	0	0	0	0	0	0	0	1	1
0.00	mir-466	Homo sapiens	0	0	0	0	0	0	0	0	0	0	0
1.00	mir-3149	Homo sapiens	0	0	0	0	0	0	0	0	0	1	1
17.00	mir-3159	Homo sapiens	0	0	0	0	0	0	0	0	0	17	17
1.00	mir-3177	Homo sapiens	0	0	0	0	1	1	1	1	0	0	1
4.00	mir-3065	Homo sapiens	0	0	0	0	1	4	1	4	0	0	4
1.00	mir-3196	Homo sapiens	0	0	0	0	0	0	0	0	0	1	1
0.00	mir-548x	Homo sapiens	0	0	0	0	0	0	0	0	0	0	0
1.00	mir-500b	Homo sapiens	0	0	0	0	0	1	0	1	0	0	1
18.00	mir-3615	Homo sapiens	0	0	0	0	0	17	0	17	1	1	18
1.00	mir-23c	Homo sapiens	0	0	0	0	0	1	0	1	0	0	1
1.00	mir-3664	Homo sapiens	0	0	0	0	0	0	0	0	1	1	1
0.00	mir-3665	Homo sapiens	0	0	0	0	0	0	0	0	0	0	0
1.00	mir-3677	Homo sapiens	0	0	0	0	0	1	0	1	0	0	1
2.00	mir-3909	Homo sapiens	0	0	0	0	2	2	2	2	0	0	2
2.00	mir-676	Homo sapiens	0	0	0	0	0	2	0	2	0	0	2
5.00	mir-3929	Homo sapiens	0	0	0	0	0	0	0	0	0	5	5
1.00	mir-3936	Homo sapiens	0	0	0	0	1	1	1	1	0	0	1
3.00	mir-4430	Homo sapiens	0	0	0	0	0	0	0	0	1	3	3
7.00	mir-4446	Homo sapiens	0	0	0	0	2	5	2	5	2	2	7
1.00	mir-548ah	Homo sapiens	0	0	0	0	0	1	0	1	0	0	1
2.00	mir-4452	Homo sapiens	0	0	0	0	0	0	0	0	0	2	2
0.00	mir-548aj-2	Homo sapiens	0	0	0	0	0	0	0	0	0	0	0
1.00	mir-4472-2	Homo sapiens	0	0	0	0	0	0	0	0	0	1	1
1.00	mir-4473	Homo sapiens	0	0	0	0	0	1	0	1	0	0	1
0.00	mir-4477a	Homo sapiens	0	0	0	0	0	0	0	0	0	0	0
1.00	mir-4477b	Homo sapiens	0	0	0	0	0	0	0	0	0	1	1
3.00	mir-4485	Homo sapiens	0	0	0	0	0	1	0	1	0	2	3
49.00	mir-3960	Homo sapiens	0	0	0	0	0	2	0	2	0	47	49
1.00	mir-4641	Homo sapiens	0	0	0	0	0	1	0	1	0	0	1
2.00	mir-4664	Homo sapiens	0	0	0	0	2	2	2	2	0	0	2
1.00	mir-4687	Homo sapiens	0	0	0	0	1	1	1	1	0	0	1
3.00	mir-3529	Homo sapiens	0	0	0	0	0	0	0	0	3	3	3
1.00	mir-4733	Homo sapiens	0	0	0	0	0	0	0	0	0	1	1
1.00	mir-3064	Homo sapiens	0	0	0	0	0	0	0	0	0	1	1
1.00	mir-4762	Homo sapiens	0	0	0	0	1	1	1	1	0	0	1
0.00	mir-4776-2	Homo sapiens	0	0	0	0	0	0	0	0	0	0	0
1.00	mir-5004	Homo sapiens	0	0	0	0	0	1	0	1	0	0	1
1.00	mir-5680	Homo sapiens	0	0	0	0	1	1	1	1	0	0	1
4.00	mir-5684	Homo sapiens	0	0	0	0	0	0	0	0	0	4	4
2.00	mir-548ax	Homo sapiens	0	0	0	0	0	0	0	0	2	2	2
1.00	mir-5696	Homo sapiens	0	0	0	0	0	0	0	0	1	1	1
0.00	mir-6125	Homo sapiens	0	0	0	0	0	0	0	0	0	0	0
2.00	mir-6127	Homo sapiens	0	0	0	0	0	0	0	0	2	2	2
4.00	mir-6500	Homo sapiens	0	0	0	0	3	4	3	4	0	0	4
17.00	mir-6510	Homo sapiens	0	0	0	0	4	17	4	17	0	0	17
1.00	mir-6511a-1	Homo sapiens	0	0	0	0	0	0	0	0	1	1	1
1.00	mir-6511b-1	Homo sapiens	0	0	0	0	0	0	0	0	1	1	1
2.00	mir-6747	Homo sapiens	0	0	0	0	0	2	0	2	0	0	2
1.00	mir-6786	Homo sapiens	0	0	0	0	0	1	0	1	0	0	1
1.00	mir-6798	Homo sapiens	0	0	0	0	1	1	1	1	0	0	1
1.00	mir-6808	Homo sapiens	0	0	0	0	0	1	0	1	0	0	1
3.00	mir-6837	Homo sapiens	0	0	0	0	0	0	0	0	2	3	3
8.00	mir-6842	Homo sapiens	0	0	0	0	4	8	4	8	0	0	8
2.00	mir-6843	Homo sapiens	0	0	0	0	0	2	0	2	0	0	2
1.00	mir-6854	Homo sapiens	0	0	0	0	0	1	0	1	0	0	1
1.00	mir-6857	Homo sapiens	0	0	0	0	0	1	0	1	0	0	1
2.00	mir-6868	Homo sapiens	0	0	0	0	0	2	0	2	0	0	2
1.00	mir-6873	Homo sapiens	0	0	0	0	0	1	0	1	0	0	1
0.00	mir-6511b-2	Homo sapiens	0	0	0	0	0	0	0	0	0	0	0
0.00	mir-6511a-2	Homo sapiens	0	0	0	0	0	0	0	0	0	0	0
0.00	mir-6511a-3	Homo sapiens	0	0	0	0	0	0	0	0	0	0	0
0.00	mir-6511a-4	Homo sapiens	0	0	0	0	0	0	0	0	0	0	0
24.00	mir-7706	Homo sapiens	0	0	0	0	2	19	2	19	4	5	24
1.00	mir-1273h	Homo sapiens	0	0	0	0	0	0	0	0	0	1	1
18.00	mir-8072	Homo sapiens	0	0	0	0	0	0	0	0	0	18	18
16.00	mir-8086	Homo sapiens	0	0	0	0	0	0	0	0	1	16	16
0.00	mir-8485	Homo sapiens	0	0	0	0	0	0	0	0	0	0	0
4.00	mir-941-5	Homo sapiens	0	0	0	0	2	4	0	0	0	0	4
1.00	mir-9902-1	Homo sapiens	0	0	0	0	0	0	0	0	0	1	1
4.00	mir-9903	Homo sapiens	0	0	0	0	2	4	2	4	0	0	4
