# Supplementary material for: Conserved MicroRNAs in Human Nasopharynx Tissue Samples from Swabs Are Differentially Expressed in Response to SARS-CoV-2
Source: Genes (Basel). 2022 Feb 14;13(2):348. doi: 10.3390/genes13020348 (PMC8871708; doi:10.3390/genes13020348)
Supplement: Supplementary file 1 [file genes-13-00348-s001.zip › Supplementary Table S2.ods]

## Sheet: D3
Expression values	Name	Resource	Exact mature 5'	Mature 5'	Unique exact mature 5'	Unique mature 5'	Exact mature 3'	Mature 3'	Unique exact mature 3'	Unique mature 3'	Exact other	Other	Total
1,694.00	mir-148a	Homo sapiens	0	1	0	1	1493	1685	1493	1684	8	8	1694
1,137.00	mir-21	Homo sapiens	193	1128	193	1128	0	0	0	0	9	9	1137
468.00	mir-200a	Homo sapiens	7	20	7	20	0	442	0	442	6	6	468
410.00	mir-99a	Homo sapiens	14	408	14	407	0	0	0	0	2	2	410
356.00	mir-34c	Homo sapiens	45	262	45	262	3	4	3	4	81	90	356
322.00	mir-151a	Homo sapiens	2	2	2	2	217	319	217	319	0	1	322
311.00	mir-200b	Homo sapiens	1	2	1	2	15	309	15	309	0	0	311
284.00	let-7i	Homo sapiens	222	275	222	275	0	0	0	0	7	9	284
240.00	let-7b	Homo sapiens	81	221	81	221	0	0	0	0	18	19	240
211.00	mir-26a-1	Homo sapiens	169	209	0	0	0	0	0	0	2	2	211
211.00	mir-26a-2	Homo sapiens	169	207	0	0	0	0	0	0	3	4	211
172.00	mir-27b	Homo sapiens	0	0	0	0	18	171	18	169	0	1	172
168.00	mir-27a	Homo sapiens	2	3	2	3	2	165	2	164	0	0	168
162.00	let-7f-2	Homo sapiens	63	159	0	11	0	0	0	0	3	3	162
158.00	mir-200c	Homo sapiens	0	0	0	0	55	149	55	148	5	9	158
154.00	let-7f-1	Homo sapiens	62	151	0	1	0	0	0	0	3	3	154
147.00	let-7g	Homo sapiens	63	142	63	142	0	0	0	0	4	5	147
91.00	mir-30d	Homo sapiens	13	84	13	84	0	0	0	0	4	7	91
72.00	mir-3074	Homo sapiens	1	72	1	72	0	0	0	0	0	0	72
70.00	mir-423	Homo sapiens	23	54	23	54	4	9	4	9	6	7	70
69.00	let-7a-3	Homo sapiens	22	66	0	0	0	1	0	0	2	2	69
69.00	mir-142	Homo sapiens	2	7	2	7	1	7	1	7	47	55	69
68.00	let-7c	Homo sapiens	29	65	29	65	0	0	0	0	2	3	68
67.00	let-7a-2	Homo sapiens	22	65	0	0	0	0	0	0	2	2	67
65.00	let-7a-1	Homo sapiens	23	64	0	0	0	0	0	0	1	1	65
64.00	mir-146b	Homo sapiens	18	64	18	63	0	0	0	0	0	0	64
64.00	mir-203b	Homo sapiens	0	64	0	64	0	0	0	0	0	0	64
59.00	mir-126	Homo sapiens	0	0	0	0	17	59	17	59	0	0	59
54.00	mir-146a	Homo sapiens	15	53	15	52	0	0	0	0	1	1	54
43.00	mir-29a	Homo sapiens	0	0	0	0	0	28	0	28	13	15	43
33.00	mir-140	Homo sapiens	3	3	3	3	4	27	4	27	1	3	33
32.00	mir-378a	Homo sapiens	0	0	0	0	0	32	0	32	0	0	32
31.00	mir-100	Homo sapiens	0	30	0	29	0	0	0	0	1	1	31
31.00	mir-25	Homo sapiens	0	1	0	1	17	30	17	30	0	0	31
30.00	mir-375	Homo sapiens	0	0	0	0	7	29	7	29	1	1	30
29.00	mir-10400	Homo sapiens	0	29	0	29	0	0	0	0	0	0	29
29.00	mir-22	Homo sapiens	0	1	0	1	11	23	11	23	5	5	29
28.00	mir-205	Homo sapiens	7	28	7	28	0	0	0	0	0	0	28
28.00	mir-30a	Homo sapiens	5	16	5	16	0	8	0	7	4	4	28
28.00	mir-429	Homo sapiens	0	0	0	0	15	28	15	28	0	0	28
27.00	mir-26b	Homo sapiens	13	27	13	27	0	0	0	0	0	0	27
27.00	mir-222	Homo sapiens	0	0	0	0	15	22	15	22	3	5	27
26.00	mir-191	Homo sapiens	8	25	8	25	0	0	0	0	1	1	26
26.00	mir-92b	Homo sapiens	0	3	0	3	7	21	7	21	1	2	26
23.00	mir-181a-2	Homo sapiens	3	17	0	0	0	1	0	1	5	5	23
22.00	mir-99b	Homo sapiens	5	21	5	21	0	1	0	1	0	0	22
22.00	mir-449c	Homo sapiens	3	21	3	21	0	0	0	0	1	1	22
21.00	mir-181a-1	Homo sapiens	3	17	0	0	0	1	0	1	3	3	21
21.00	mir-148b	Homo sapiens	0	0	0	0	8	21	8	21	0	0	21
20.00	mir-150	Homo sapiens	11	20	11	20	0	0	0	0	0	0	20
20.00	mir-30e	Homo sapiens	3	8	3	8	2	7	2	7	5	5	20
20.00	mir-141	Homo sapiens	0	1	0	1	0	17	0	17	2	2	20
20.00	mir-143	Homo sapiens	0	0	0	0	13	20	13	20	0	0	20
20.00	mir-361	Homo sapiens	0	0	0	0	2	16	2	16	4	4	20
19.00	mir-183	Homo sapiens	15	18	15	18	0	0	0	0	0	1	19
19.00	mir-449a	Homo sapiens	13	18	13	18	0	0	0	0	0	1	19
18.00	mir-155	Homo sapiens	0	13	0	13	0	0	0	0	5	5	18
16.00	mir-221	Homo sapiens	0	0	0	0	3	10	3	10	6	6	16
16.00	mir-1180	Homo sapiens	0	0	0	0	8	13	8	13	3	3	16
15.00	mir-182	Homo sapiens	7	14	7	14	0	0	0	0	1	1	15
14.00	mir-451a	Homo sapiens	0	14	0	14	0	0	0	0	0	0	14
14.00	mir-125a	Homo sapiens	0	10	0	10	0	1	0	1	2	3	14
14.00	mir-28	Homo sapiens	1	5	1	5	5	9	5	9	0	0	14
14.00	mir-101-1	Homo sapiens	0	0	0	0	4	13	0	0	1	1	14
14.00	mir-128-1	Homo sapiens	0	0	0	0	3	14	0	3	0	0	14
14.00	mir-320a	Homo sapiens	0	0	0	0	4	14	4	14	0	0	14
14.00	mir-3960	Homo sapiens	0	0	0	0	0	2	0	2	0	12	14
13.00	mir-186	Homo sapiens	3	13	3	13	0	0	0	0	0	0	13
13.00	mir-2110	Homo sapiens	0	9	0	9	0	0	0	0	3	4	13
13.00	mir-34b	Homo sapiens	0	1	0	1	0	12	0	12	0	0	13
12.00	mir-101-2	Homo sapiens	0	0	0	0	4	12	0	0	0	0	12
11.00	mir-532	Homo sapiens	7	11	7	11	0	0	0	0	0	0	11
11.00	mir-223	Homo sapiens	0	0	0	0	3	10	3	10	1	1	11
10.00	mir-342	Homo sapiens	2	10	2	10	0	0	0	0	0	0	10
10.00	mir-192	Homo sapiens	1	9	1	9	0	0	0	0	1	1	10
10.00	mir-92a-1	Homo sapiens	0	0	0	0	2	10	0	2	0	0	10
10.00	mir-128-2	Homo sapiens	0	0	0	0	3	10	0	1	0	0	10
9.00	mir-425	Homo sapiens	1	8	1	8	0	1	0	1	0	0	9
9.00	let-7e	Homo sapiens	2	6	2	6	0	0	0	0	3	3	9
9.00	mir-708	Homo sapiens	0	0	0	0	0	9	0	9	0	0	9
8.00	mir-10b	Homo sapiens	2	8	2	8	0	0	0	0	0	0	8
8.00	let-7d	Homo sapiens	0	7	0	6	0	1	0	1	0	0	8
8.00	mir-23b	Homo sapiens	0	0	0	0	1	6	1	6	2	2	8
8.00	mir-106b	Homo sapiens	0	0	0	0	2	5	2	5	3	3	8
7.00	mir-3184	Homo sapiens	0	1	0	1	0	0	0	0	5	6	7
7.00	mir-92a-2	Homo sapiens	0	0	0	0	1	7	0	0	0	0	7
7.00	mir-152	Homo sapiens	0	0	0	0	2	7	2	7	0	0	7
7.00	mir-184	Homo sapiens	0	0	0	0	3	6	3	6	1	1	7
6.00	mir-10a	Homo sapiens	1	6	1	6	0	0	0	0	0	0	6
6.00	mir-744	Homo sapiens	1	6	1	6	0	0	0	0	0	0	6
6.00	mir-224	Homo sapiens	0	5	0	5	0	0	0	0	1	1	6
6.00	mir-125b-1	Homo sapiens	1	4	0	0	0	1	0	1	1	1	6
6.00	mir-340	Homo sapiens	1	4	1	4	1	2	1	2	0	0	6
6.00	mir-125b-2	Homo sapiens	0	3	0	0	0	2	0	2	1	1	6
6.00	mir-363	Homo sapiens	0	0	0	0	4	6	4	6	0	0	6
6.00	mir-8072	Homo sapiens	0	0	0	0	0	0	0	0	0	6	6
5.00	mir-374a	Homo sapiens	1	4	1	4	1	1	1	1	0	0	5
5.00	mir-98	Homo sapiens	1	3	1	3	0	0	0	0	2	2	5
5.00	mir-199b	Homo sapiens	0	1	0	1	0	4	0	0	0	0	5
4.00	mir-20a	Homo sapiens	4	4	4	4	0	0	0	0	0	0	4
4.00	mir-135b	Homo sapiens	3	4	3	4	0	0	0	0	0	0	4
4.00	mir-455	Homo sapiens	0	4	0	4	0	0	0	0	0	0	4
4.00	mir-190b	Homo sapiens	2	4	2	4	0	0	0	0	0	0	4
4.00	mir-9-2	Homo sapiens	1	3	0	0	0	0	0	0	1	1	4
4.00	mir-24-2	Homo sapiens	0	2	0	2	0	1	0	0	1	1	4
4.00	mir-628	Homo sapiens	1	2	1	2	0	0	0	0	2	2	4
4.00	mir-23a	Homo sapiens	0	0	0	0	0	4	0	4	0	0	4
4.00	mir-199a-2	Homo sapiens	0	0	0	0	0	4	0	0	0	0	4
4.00	mir-1307	Homo sapiens	0	0	0	0	0	4	0	4	0	0	4
3.00	mir-32	Homo sapiens	2	3	2	3	0	0	0	0	0	0	3
3.00	mir-96	Homo sapiens	3	3	3	3	0	0	0	0	0	0	3
3.00	mir-9-3	Homo sapiens	0	3	0	0	0	0	0	0	0	0	3
3.00	mir-194-2	Homo sapiens	0	3	0	0	0	0	0	0	0	0	3
3.00	mir-3613	Homo sapiens	1	3	1	3	0	0	0	0	0	0	3
3.00	mir-30c-1	Homo sapiens	1	2	0	0	0	0	0	0	1	1	3
3.00	mir-199a-1	Homo sapiens	0	0	0	0	0	3	0	0	0	0	3
3.00	mir-181b-1	Homo sapiens	0	0	0	0	0	2	0	2	1	1	3
3.00	mir-210	Homo sapiens	0	0	0	0	0	3	0	3	0	0	3
3.00	mir-132	Homo sapiens	0	0	0	0	0	2	0	2	1	1	3
3.00	mir-6503	Homo sapiens	0	0	0	0	0	1	0	1	0	2	3
3.00	mir-6510	Homo sapiens	0	0	0	0	0	3	0	3	0	0	3
2.00	mir-16-1	Homo sapiens	0	2	0	0	0	0	0	0	0	0	2
2.00	mir-30c-2	Homo sapiens	1	2	0	0	0	0	0	0	0	0	2
2.00	mir-7-2	Homo sapiens	1	2	0	0	0	0	0	0	0	0	2
2.00	mir-7-3	Homo sapiens	1	2	0	0	0	0	0	0	0	0	2
2.00	mir-218-1	Homo sapiens	1	2	0	0	0	0	0	0	0	0	2
2.00	mir-30b	Homo sapiens	1	2	1	2	0	0	0	0	0	0	2
2.00	mir-149	Homo sapiens	1	2	1	2	0	0	0	0	0	0	2
2.00	mir-486-1	Homo sapiens	0	2	0	1	0	0	0	0	0	0	2
2.00	mir-499a	Homo sapiens	0	2	0	2	0	0	0	0	0	0	2
2.00	mir-374b	Homo sapiens	0	2	0	2	0	0	0	0	0	0	2
2.00	mir-934	Homo sapiens	0	2	0	2	0	0	0	0	0	0	2
2.00	mir-1246	Homo sapiens	0	2	0	2	0	0	0	0	0	0	2
2.00	mir-16-2	Homo sapiens	0	1	0	0	0	1	0	1	0	0	2
2.00	mir-9-1	Homo sapiens	1	1	0	0	0	0	0	0	1	1	2
2.00	mir-1843	Homo sapiens	0	1	0	1	0	0	0	0	0	1	2
2.00	mir-29b-1	Homo sapiens	0	0	0	0	0	0	0	0	2	2	2
2.00	mir-181b-2	Homo sapiens	0	0	0	0	0	0	0	0	2	2	2
2.00	mir-29c	Homo sapiens	0	0	0	0	0	2	0	2	0	0	2
2.00	mir-452	Homo sapiens	0	0	0	0	0	0	0	0	2	2	2
2.00	mir-501	Homo sapiens	0	0	0	0	0	2	0	2	0	0	2
2.00	mir-574	Homo sapiens	0	0	0	0	1	1	1	1	0	1	2
2.00	mir-874	Homo sapiens	0	0	0	0	0	2	0	2	0	0	2
2.00	mir-147b	Homo sapiens	0	0	0	0	0	2	0	2	0	0	2
2.00	mir-3605	Homo sapiens	0	0	0	0	0	0	0	0	1	2	2
2.00	mir-4446	Homo sapiens	0	0	0	0	1	2	1	2	0	0	2
2.00	mir-4787	Homo sapiens	0	0	0	0	0	1	0	1	0	1	2
2.00	mir-8086	Homo sapiens	0	0	0	0	0	0	0	0	0	2	2
2.00	mir-941-5	Homo sapiens	0	0	0	0	1	1	0	0	1	1	2
1.00	mir-17	Homo sapiens	0	1	0	0	0	0	0	0	0	0	1
1.00	mir-31	Homo sapiens	0	1	0	1	0	0	0	0	0	0	1
1.00	mir-129-1	Homo sapiens	1	1	0	0	0	0	0	0	0	0	1
1.00	mir-139	Homo sapiens	0	1	0	1	0	0	0	0	0	0	1
1.00	mir-7-1	Homo sapiens	1	1	0	0	0	0	0	0	0	0	1
1.00	mir-204	Homo sapiens	1	1	1	1	0	0	0	0	0	0	1
1.00	mir-218-2	Homo sapiens	1	1	0	0	0	0	0	0	0	0	1
1.00	mir-129-2	Homo sapiens	0	1	0	0	0	0	0	0	0	0	1
1.00	mir-185	Homo sapiens	0	1	0	1	0	0	0	0	0	0	1
1.00	mir-193a	Homo sapiens	0	1	0	1	0	0	0	0	0	0	1
1.00	mir-194-1	Homo sapiens	0	1	0	0	0	0	0	0	0	0	1
1.00	mir-195	Homo sapiens	0	1	0	1	0	0	0	0	0	0	1
1.00	mir-511	Homo sapiens	1	1	1	1	0	0	0	0	0	0	1
1.00	mir-584	Homo sapiens	0	1	0	1	0	0	0	0	0	0	1
1.00	mir-625	Homo sapiens	0	1	0	1	0	0	0	0	0	0	1
1.00	mir-449b	Homo sapiens	0	1	0	1	0	0	0	0	0	0	1
1.00	mir-769	Homo sapiens	0	1	0	1	0	0	0	0	0	0	1
1.00	mir-509-3	Homo sapiens	0	1	0	1	0	0	0	0	0	0	1
1.00	mir-1262	Homo sapiens	0	1	0	1	0	0	0	0	0	0	1
1.00	mir-103b-1	Homo sapiens	1	1	0	0	0	0	0	0	0	0	1
1.00	mir-103b-2	Homo sapiens	0	1	0	0	0	0	0	0	0	0	1
1.00	mir-3614	Homo sapiens	0	1	0	1	0	0	0	0	0	0	1
1.00	mir-378i	Homo sapiens	0	1	0	1	0	0	0	0	0	0	1
1.00	mir-6736	Homo sapiens	0	1	0	1	0	0	0	0	0	0	1
1.00	mir-6866	Homo sapiens	0	1	0	1	0	0	0	0	0	0	1
1.00	mir-486-2	Homo sapiens	0	1	0	0	0	0	0	0	0	0	1
1.00	mir-24-1	Homo sapiens	0	0	0	0	0	1	0	0	0	0	1
1.00	mir-95	Homo sapiens	0	0	0	0	0	1	0	1	0	0	1
1.00	mir-29b-2	Homo sapiens	0	0	0	0	0	0	0	0	1	1	1
1.00	mir-103a-2	Homo sapiens	0	0	0	0	0	0	0	0	1	1	1
1.00	mir-203a	Homo sapiens	0	0	0	0	0	1	0	1	0	0	1
1.00	mir-15b	Homo sapiens	0	0	0	0	0	1	0	1	0	0	1
1.00	mir-328	Homo sapiens	0	0	0	0	0	1	0	1	0	0	1
1.00	mir-424	Homo sapiens	0	0	0	0	0	1	0	1	0	0	1
1.00	mir-484	Homo sapiens	0	0	0	0	0	0	0	0	0	1	1
1.00	mir-514a-1	Homo sapiens	0	0	0	0	1	1	0	0	0	0	1
1.00	mir-582	Homo sapiens	0	0	0	0	1	1	1	1	0	0	1
1.00	mir-598	Homo sapiens	0	0	0	0	0	1	0	1	0	0	1
1.00	mir-652	Homo sapiens	0	0	0	0	0	1	0	1	0	0	1
1.00	mir-766	Homo sapiens	0	0	0	0	0	1	0	1	0	0	1
1.00	mir-320b-2	Homo sapiens	0	0	0	0	0	1	0	0	0	0	1
1.00	mir-941-1	Homo sapiens	0	0	0	0	1	1	0	0	0	0	1
1.00	mir-941-2	Homo sapiens	0	0	0	0	0	1	0	0	0	0	1
1.00	mir-941-3	Homo sapiens	0	0	0	0	1	1	0	0	0	0	1
1.00	mir-320c-2	Homo sapiens	0	0	0	0	0	1	0	0	0	0	1
1.00	mir-3615	Homo sapiens	0	0	0	0	0	1	0	1	0	0	1
1.00	mir-3929	Homo sapiens	0	0	0	0	0	0	0	0	0	1	1
1.00	mir-4440	Homo sapiens	0	0	0	0	0	0	0	0	0	1	1
1.00	mir-4504	Homo sapiens	0	0	0	0	1	1	1	1	0	0	1
1.00	mir-5689	Homo sapiens	0	0	0	0	0	0	0	0	0	1	1
1.00	mir-6127	Homo sapiens	0	0	0	0	0	0	0	0	0	1	1
1.00	mir-6818	Homo sapiens	0	0	0	0	0	0	0	0	1	1	1
1.00	mir-7705	Homo sapiens	0	0	0	0	0	0	0	0	1	1	1
1.00	mir-7706	Homo sapiens	0	0	0	0	0	1	0	1	0	0	1
1.00	mir-7851	Homo sapiens	0	0	0	0	0	0	0	0	0	1	1
1.00	mir-3648-2	Homo sapiens	0	0	0	0	0	0	0	0	1	1	1
1.00	mir-9903	Homo sapiens	0	0	0	0	1	1	1	1	0	0	1
1.00	mir-10395	Homo sapiens	0	0	0	0	0	0	0	0	1	1	1
1.00	mir-10396b	Homo sapiens	0	0	0	0	0	0	0	0	1	1	1
0.00	mir-103a-1	Homo sapiens	0	0	0	0	0	0	0	0	0	0	0
0.00	mir-106a	Homo sapiens	0	0	0	0	0	0	0	0	0	0	0
0.00	mir-107	Homo sapiens	0	0	0	0	0	0	0	0	0	0	0
0.00	mir-514a-2	Homo sapiens	0	0	0	0	0	0	0	0	0	0	0
0.00	mir-514a-3	Homo sapiens	0	0	0	0	0	0	0	0	0	0	0
0.00	mir-619	Homo sapiens	0	0	0	0	0	0	0	0	0	0	0
0.00	mir-320b-1	Homo sapiens	0	0	0	0	0	0	0	0	0	0	0
0.00	mir-320c-1	Homo sapiens	0	0	0	0	0	0	0	0	0	0	0
0.00	mir-941-4	Homo sapiens	0	0	0	0	0	0	0	0	0	0	0
0.00	mir-1181	Homo sapiens	0	0	0	0	0	0	0	0	0	0	0
0.00	mir-3648-1	Homo sapiens	0	0	0	0	0	0	0	0	0	0	0
0.00	mir-5684	Homo sapiens	0	0	0	0	0	0	0	0	0	0	0
0.00	mir-6125	Homo sapiens	0	0	0	0	0	0	0	0	0	0	0

## Sheet: H3
Expression values	Name	Resource	Exact mature 5'	Mature 5'	Unique exact mature 5'	Unique mature 5'	Exact mature 3'	Mature 3'	Unique exact mature 3'	Unique mature 3'	Exact other	Other	Total
34,635.00	mir-21	Homo sapiens	8041	33825	8041	33825	5	6	5	6	741	804	34635
26,928.00	mir-148a	Homo sapiens	11	21	11	21	24103	26805	24103	26767	96	102	26928
24,699.00	mir-200a	Homo sapiens	265	562	265	562	3	23927	3	23900	196	210	24699
16,149.00	mir-34c	Homo sapiens	375	11973	375	11972	78	182	78	182	3794	3994	16149
9,862.00	let-7b	Homo sapiens	2263	7969	2263	7962	1	6	1	6	1793	1887	9862
9,571.00	let-7i	Homo sapiens	7021	8737	7021	8725	1	5	1	5	753	829	9571
9,009.00	mir-200b	Homo sapiens	35	143	35	143	655	8838	655	8826	19	28	9009
7,792.00	mir-99a	Homo sapiens	163	7708	163	7702	0	0	0	0	78	84	7792
4,614.00	mir-200c	Homo sapiens	0	0	0	0	1275	4459	1275	4451	137	155	4614
4,154.00	mir-27a	Homo sapiens	14	45	14	45	12	4104	12	4092	5	5	4154
4,029.00	mir-146a	Homo sapiens	1066	4006	1066	3959	0	1	0	1	21	22	4029
3,613.00	let-7g	Homo sapiens	753	3492	753	3474	0	0	0	0	107	121	3613
3,480.00	mir-151a	Homo sapiens	40	106	40	106	1907	3354	1907	3354	12	20	3480
3,478.00	let-7f-2	Homo sapiens	628	3384	0	107	0	1	0	1	87	93	3478
3,399.00	let-7f-1	Homo sapiens	629	3295	0	16	0	5	0	5	94	99	3399
3,288.00	mir-146b	Homo sapiens	1249	3255	1249	3212	0	7	0	7	26	26	3288
2,451.00	mir-3074	Homo sapiens	0	2419	0	2419	0	30	0	30	2	2	2451
2,257.00	mir-26a-2	Homo sapiens	1655	2226	0	0	0	2	0	2	28	29	2257
2,242.00	mir-26a-1	Homo sapiens	1654	2211	0	0	1	1	1	1	29	30	2242
2,186.00	mir-30d	Homo sapiens	430	2062	430	2058	0	6	0	6	103	118	2186
2,161.00	let-7c	Homo sapiens	586	1823	586	1814	0	0	0	0	320	338	2161
2,081.00	let-7a-3	Homo sapiens	259	1948	0	4	2	12	0	0	100	121	2081
2,079.00	let-7a-1	Homo sapiens	260	1948	0	5	1	12	0	0	100	119	2079
2,058.00	let-7a-2	Homo sapiens	259	1941	0	0	0	0	0	0	99	117	2058
2,043.00	mir-27b	Homo sapiens	0	0	0	0	77	2041	77	2025	0	2	2043
1,382.00	mir-375	Homo sapiens	0	0	0	0	146	1062	146	1062	297	320	1382
1,326.00	mir-142	Homo sapiens	44	171	44	171	31	124	31	124	944	1031	1326
1,311.00	mir-100	Homo sapiens	30	1271	30	1266	0	0	0	0	38	40	1311
1,279.00	mir-22	Homo sapiens	0	81	0	81	343	1085	343	1085	96	113	1279
1,271.00	mir-423	Homo sapiens	328	920	328	920	106	239	106	239	100	112	1271
1,256.00	mir-29a	Homo sapiens	0	0	0	0	16	889	16	888	340	367	1256
1,103.00	mir-429	Homo sapiens	0	0	0	0	285	1071	285	1071	29	32	1103
1,001.00	mir-25	Homo sapiens	3	13	3	13	564	977	564	977	3	11	1001
997.00	mir-320a	Homo sapiens	0	0	0	0	307	974	307	936	7	23	997
963.00	mir-26b	Homo sapiens	468	961	468	960	0	1	0	1	0	1	963
900.00	mir-30a	Homo sapiens	172	733	172	732	18	110	18	99	52	57	900
856.00	mir-141	Homo sapiens	3	8	3	8	0	696	0	670	140	152	856
834.00	mir-143	Homo sapiens	0	2	0	2	582	832	582	832	0	0	834
827.00	mir-186	Homo sapiens	255	799	255	799	0	0	0	0	27	28	827
773.00	mir-203b	Homo sapiens	0	771	0	771	0	2	0	2	0	0	773
725.00	mir-222	Homo sapiens	0	0	0	0	431	684	431	684	30	41	725
599.00	mir-30e	Homo sapiens	65	352	65	349	52	163	52	156	73	84	599
530.00	mir-191	Homo sapiens	170	460	170	460	0	3	0	3	63	67	530
501.00	mir-449c	Homo sapiens	40	496	40	496	0	0	0	0	1	5	501
491.00	mir-181a-1	Homo sapiens	24	319	0	0	2	10	2	10	151	162	491
490.00	mir-181a-2	Homo sapiens	24	322	0	0	1	7	1	7	150	161	490
457.00	mir-223	Homo sapiens	2	80	2	80	89	347	89	347	24	30	457
450.00	mir-1180	Homo sapiens	0	0	0	0	116	368	116	368	70	82	450
446.00	mir-449a	Homo sapiens	280	392	280	387	0	0	0	0	49	54	446
440.00	mir-221	Homo sapiens	0	32	0	32	11	231	11	231	164	177	440
432.00	mir-140	Homo sapiens	51	72	51	72	43	273	43	273	17	87	432
406.00	let-7d	Homo sapiens	3	372	3	362	0	10	0	10	24	24	406
400.00	mir-10400	Homo sapiens	0	400	0	400	0	0	0	0	0	0	400
391.00	mir-101-2	Homo sapiens	0	0	0	0	79	381	0	39	8	10	391
375.00	mir-205	Homo sapiens	111	341	111	341	0	0	0	0	20	34	375
372.00	mir-378a	Homo sapiens	1	2	1	2	5	369	5	369	1	1	372
371.00	mir-451a	Homo sapiens	0	371	0	371	0	0	0	0	0	0	371
368.00	mir-128-1	Homo sapiens	0	0	0	0	95	366	0	138	0	2	368
352.00	mir-183	Homo sapiens	198	352	198	352	0	0	0	0	0	0	352
352.00	mir-101-1	Homo sapiens	0	0	0	0	78	340	0	0	9	12	352
348.00	mir-99b	Homo sapiens	79	320	79	319	10	14	10	14	14	14	348
330.00	mir-92b	Homo sapiens	0	78	0	78	18	137	18	133	79	115	330
312.00	mir-28	Homo sapiens	11	72	11	72	92	233	92	233	4	7	312
305.00	mir-148b	Homo sapiens	0	7	0	7	119	293	119	256	4	5	305
303.00	mir-125b-2	Homo sapiens	20	206	0	1	1	11	1	11	81	86	303
303.00	mir-34b	Homo sapiens	0	21	0	20	2	264	2	264	14	18	303
297.00	mir-125b-1	Homo sapiens	20	203	0	0	3	9	3	9	82	85	297
296.00	mir-2110	Homo sapiens	23	274	23	274	0	0	0	0	13	22	296
293.00	mir-182	Homo sapiens	30	216	30	216	0	1	0	1	73	76	293
284.00	mir-125a	Homo sapiens	8	211	8	211	1	9	1	9	58	64	284
281.00	mir-361	Homo sapiens	3	17	3	17	12	230	12	230	29	34	281
277.00	mir-1246	Homo sapiens	5	276	5	276	0	0	0	0	0	1	277
269.00	mir-192	Homo sapiens	38	181	38	181	0	0	0	0	65	88	269
267.00	mir-342	Homo sapiens	46	202	46	202	13	53	13	53	10	12	267
266.00	mir-3960	Homo sapiens	0	0	0	0	0	12	0	12	0	254	266
265.00	mir-340	Homo sapiens	99	232	99	232	9	31	9	31	1	2	265
240.00	mir-532	Homo sapiens	183	238	183	238	0	1	0	1	1	1	240
234.00	mir-128-2	Homo sapiens	0	0	0	0	94	234	0	1	0	0	234
228.00	mir-7-2	Homo sapiens	113	175	0	0	0	0	0	0	49	53	228
220.00	mir-7-3	Homo sapiens	113	168	0	0	0	0	0	0	49	52	220
219.00	mir-363	Homo sapiens	0	0	0	0	167	218	167	218	1	1	219
217.00	mir-7-1	Homo sapiens	112	164	0	2	0	0	0	0	50	53	217
200.00	mir-155	Homo sapiens	1	156	1	156	0	0	0	0	36	44	200
187.00	mir-16-2	Homo sapiens	28	104	0	0	4	71	4	71	10	12	187
176.00	mir-92a-1	Homo sapiens	0	0	0	0	77	171	0	20	2	5	176
155.00	mir-92a-2	Homo sapiens	0	0	0	0	77	152	0	0	2	3	155
153.00	mir-181b-2	Homo sapiens	5	39	0	1	0	0	0	0	104	114	153
152.00	mir-181b-1	Homo sapiens	5	37	0	1	0	0	0	0	105	115	152
152.00	mir-8072	Homo sapiens	0	0	0	0	0	0	0	0	0	152	152
150.00	mir-224	Homo sapiens	0	98	0	98	0	1	0	1	46	51	150
145.00	mir-3184	Homo sapiens	0	29	0	29	0	0	0	0	102	116	145
142.00	mir-190b	Homo sapiens	74	142	74	142	0	0	0	0	0	0	142
127.00	mir-152	Homo sapiens	0	0	0	0	25	123	25	123	0	4	127
123.00	mir-24-2	Homo sapiens	0	37	0	37	0	72	0	0	13	14	123
122.00	mir-98	Homo sapiens	49	100	49	98	0	2	0	2	19	20	122
106.00	mir-16-1	Homo sapiens	27	104	0	0	0	0	0	0	2	2	106
105.00	mir-1307	Homo sapiens	7	12	7	12	0	93	0	93	0	0	105
87.00	mir-9-2	Homo sapiens	2	31	0	0	0	1	0	0	53	55	87
87.00	mir-9-3	Homo sapiens	2	30	0	0	0	0	0	0	53	57	87
87.00	mir-106b	Homo sapiens	2	12	2	12	12	60	12	60	15	15	87
84.00	mir-9-1	Homo sapiens	2	26	0	0	0	1	0	0	54	57	84
84.00	mir-24-1	Homo sapiens	0	9	0	9	0	75	0	0	0	0	84
81.00	mir-126	Homo sapiens	1	1	1	1	27	78	27	78	2	2	81
80.00	mir-8086	Homo sapiens	0	0	0	0	0	0	0	0	9	80	80
78.00	mir-499a	Homo sapiens	5	78	5	78	0	0	0	0	0	0	78
78.00	mir-23a	Homo sapiens	0	7	0	7	0	69	0	69	0	2	78
77.00	mir-150	Homo sapiens	55	71	55	71	0	5	0	5	1	1	77
76.00	mir-449b	Homo sapiens	1	70	1	65	0	0	0	0	1	6	76
75.00	mir-135b	Homo sapiens	55	74	55	74	0	1	0	1	0	0	75
74.00	mir-3615	Homo sapiens	0	0	0	0	1	71	1	71	1	3	74
73.00	mir-103b-2	Homo sapiens	30	65	0	0	0	0	0	0	8	8	73
73.00	mir-132	Homo sapiens	16	40	16	40	5	16	5	16	14	17	73
72.00	mir-103b-1	Homo sapiens	31	65	0	0	0	0	0	0	7	7	72
71.00	mir-3159	Homo sapiens	0	0	0	0	0	0	0	0	11	71	71
70.00	mir-425	Homo sapiens	5	60	5	60	0	6	0	6	4	4	70
68.00	mir-1843	Homo sapiens	1	65	1	65	0	0	0	0	0	3	68
64.00	mir-29b-1	Homo sapiens	0	0	0	0	10	44	0	0	18	20	64
61.00	mir-30c-1	Homo sapiens	28	51	0	0	0	1	0	1	9	9	61
61.00	mir-29b-2	Homo sapiens	0	0	0	0	11	41	0	0	16	20	61
59.00	mir-32	Homo sapiens	44	56	44	56	0	3	0	3	0	0	59
58.00	mir-30c-2	Homo sapiens	28	47	0	0	0	2	0	2	9	9	58
56.00	mir-184	Homo sapiens	0	0	0	0	33	49	33	49	7	7	56
56.00	mir-3529	Homo sapiens	0	0	0	0	0	0	0	0	50	56	56
55.00	mir-629	Homo sapiens	27	55	27	55	0	0	0	0	0	0	55
55.00	mir-10a	Homo sapiens	2	52	2	52	0	0	0	0	3	3	55
54.00	let-7e	Homo sapiens	11	54	11	49	0	0	0	0	0	0	54
48.00	mir-20a	Homo sapiens	41	48	41	48	0	0	0	0	0	0	48
48.00	mir-744	Homo sapiens	7	44	7	44	0	0	0	0	2	4	48
48.00	mir-193a	Homo sapiens	9	43	9	43	0	0	0	0	5	5	48
48.00	mir-582	Homo sapiens	0	0	0	0	36	47	36	47	1	1	48
43.00	mir-1285-1	Homo sapiens	0	1	0	1	0	2	0	0	7	40	43
42.00	mir-320b-1	Homo sapiens	0	0	0	0	0	42	0	0	0	0	42
41.00	mir-708	Homo sapiens	0	1	0	1	0	32	0	32	8	8	41
41.00	mir-320b-2	Homo sapiens	0	0	0	0	0	41	0	0	0	0	41
40.00	mir-574	Homo sapiens	0	0	0	0	5	7	5	7	17	33	40
40.00	mir-1290	Homo sapiens	0	0	0	0	0	40	0	40	0	0	40
39.00	mir-625	Homo sapiens	0	35	0	35	0	4	0	4	0	0	39
38.00	mir-185	Homo sapiens	4	36	4	36	0	1	0	1	0	1	38
37.00	mir-345	Homo sapiens	9	33	9	33	0	0	0	0	4	4	37
37.00	mir-374a	Homo sapiens	6	29	6	29	4	6	4	6	2	2	37
37.00	mir-199b	Homo sapiens	3	19	3	19	0	18	0	0	0	0	37
37.00	mir-941-1	Homo sapiens	0	0	0	0	18	36	0	0	1	1	37
37.00	mir-6510	Homo sapiens	0	0	0	0	6	37	6	37	0	0	37
36.00	mir-769	Homo sapiens	11	35	11	35	0	1	0	1	0	0	36
36.00	mir-511	Homo sapiens	12	34	12	34	0	0	0	0	2	2	36
36.00	mir-181d	Homo sapiens	11	25	11	25	0	0	0	0	10	11	36
36.00	mir-29c	Homo sapiens	0	7	0	7	0	21	0	19	8	8	36
35.00	mir-941-4	Homo sapiens	0	0	0	0	18	33	0	0	1	2	35
35.00	mir-941-5	Homo sapiens	0	0	0	0	18	33	0	0	2	2	35
34.00	mir-486-2	Homo sapiens	10	34	0	1	0	0	0	0	0	0	34
34.00	mir-1301	Homo sapiens	0	0	0	0	2	20	2	20	11	14	34
34.00	mir-941-2	Homo sapiens	0	0	0	0	18	33	0	0	1	1	34
33.00	mir-628	Homo sapiens	4	14	4	14	0	18	0	18	0	1	33
33.00	mir-95	Homo sapiens	0	0	0	0	6	33	6	33	0	0	33
32.00	mir-484	Homo sapiens	5	30	5	30	0	0	0	0	2	2	32
31.00	mir-486-1	Homo sapiens	10	31	0	1	0	0	0	0	0	0	31
31.00	mir-210	Homo sapiens	0	0	0	0	1	27	1	27	1	4	31
31.00	mir-941-3	Homo sapiens	0	0	0	0	18	30	0	0	1	1	31
30.00	mir-374b	Homo sapiens	0	30	0	29	0	0	0	0	0	0	30
30.00	mir-218-1	Homo sapiens	16	29	0	0	0	0	0	0	0	1	30
29.00	mir-218-2	Homo sapiens	16	29	0	0	0	0	0	0	0	0	29
29.00	mir-501	Homo sapiens	0	1	0	1	1	28	1	28	0	0	29
28.00	mir-7851	Homo sapiens	0	0	0	0	0	0	0	0	0	28	28
27.00	mir-618	Homo sapiens	20	26	20	26	0	0	0	0	0	1	27
27.00	mir-10395	Homo sapiens	0	0	0	0	2	24	2	24	3	3	27
26.00	mir-23b	Homo sapiens	1	6	1	6	0	11	0	11	5	9	26
26.00	mir-339	Homo sapiens	1	1	1	1	0	19	0	19	6	6	26
24.00	mir-652	Homo sapiens	0	0	0	0	8	24	8	24	0	0	24
24.00	mir-760	Homo sapiens	0	0	0	0	1	24	1	24	0	0	24
24.00	mir-5684	Homo sapiens	0	0	0	0	0	0	0	0	0	24	24
23.00	mir-96	Homo sapiens	17	23	17	23	0	0	0	0	0	0	23
23.00	mir-3613	Homo sapiens	15	23	15	23	0	0	0	0	0	0	23
23.00	mir-619	Homo sapiens	0	9	0	9	0	0	0	0	1	14	23
23.00	mir-3135b	Homo sapiens	0	8	0	8	0	0	0	0	1	15	23
23.00	mir-452	Homo sapiens	4	7	4	7	0	0	0	0	15	16	23
22.00	mir-330	Homo sapiens	0	12	0	12	1	10	1	10	0	0	22
22.00	mir-199a-2	Homo sapiens	0	1	0	0	0	21	0	1	0	0	22
21.00	mir-199a-1	Homo sapiens	0	0	0	0	1	21	0	0	0	0	21
21.00	mir-514a-3	Homo sapiens	0	0	0	0	18	21	0	0	0	0	21
20.00	mir-10399	Homo sapiens	0	1	0	1	0	10	0	10	9	9	20
20.00	mir-328	Homo sapiens	0	0	0	0	13	20	13	20	0	0	20
20.00	mir-514a-2	Homo sapiens	0	0	0	0	17	19	0	0	0	1	20
20.00	mir-3929	Homo sapiens	0	0	0	0	0	0	0	0	2	20	20
19.00	mir-15b	Homo sapiens	3	6	3	6	2	13	2	13	0	0	19
19.00	mir-1273h	Homo sapiens	0	2	0	2	0	3	0	3	1	14	19
19.00	mir-19a	Homo sapiens	0	0	0	0	0	19	0	19	0	0	19
19.00	mir-514a-1	Homo sapiens	0	0	0	0	17	19	0	0	0	0	19
19.00	mir-7706	Homo sapiens	0	0	0	0	2	17	2	17	2	2	19
18.00	mir-338	Homo sapiens	0	17	0	17	0	1	0	1	0	0	18
18.00	mir-424	Homo sapiens	0	3	0	3	6	15	6	15	0	0	18
18.00	mir-502	Homo sapiens	0	0	0	0	4	18	4	18	0	0	18
18.00	mir-4446	Homo sapiens	0	0	0	0	6	15	6	15	3	3	18
18.00	mir-6842	Homo sapiens	0	0	0	0	6	16	6	16	2	2	18
16.00	mir-450a-2	Homo sapiens	1	13	0	0	0	3	0	3	0	0	16
16.00	mir-509-3	Homo sapiens	4	12	4	12	0	1	0	0	3	3	16
15.00	mir-194-2	Homo sapiens	0	12	0	0	0	2	0	2	1	1	15
15.00	mir-576	Homo sapiens	0	0	0	0	5	12	5	12	3	3	15
15.00	mir-4430	Homo sapiens	0	0	0	0	0	0	0	0	0	15	15
15.00	mir-4472-2	Homo sapiens	0	0	0	0	0	0	0	0	2	15	15
14.00	mir-30b	Homo sapiens	2	14	2	14	0	0	0	0	0	0	14
14.00	mir-651	Homo sapiens	3	13	3	13	0	0	0	0	1	1	14
14.00	mir-421	Homo sapiens	0	0	0	0	2	13	2	13	1	1	14
13.00	mir-31	Homo sapiens	0	11	0	11	2	2	2	2	0	0	13
13.00	mir-19b-1	Homo sapiens	0	0	0	0	1	13	0	0	0	0	13
12.00	mir-194-1	Homo sapiens	1	12	0	0	0	0	0	0	0	0	12
12.00	mir-378i	Homo sapiens	0	12	0	12	0	0	0	0	0	0	12
12.00	mir-335	Homo sapiens	0	7	0	7	2	5	2	5	0	0	12
12.00	mir-19b-2	Homo sapiens	0	0	0	0	1	12	0	0	0	0	12
12.00	mir-130a	Homo sapiens	0	0	0	0	0	9	0	9	3	3	12
12.00	mir-1299	Homo sapiens	0	0	0	0	0	8	0	8	3	4	12
11.00	mir-4488	Homo sapiens	0	11	0	11	0	0	0	0	0	0	11
11.00	mir-450a-1	Homo sapiens	0	10	0	0	0	1	0	1	0	0	11
11.00	mir-149	Homo sapiens	0	9	0	9	0	0	0	0	2	2	11
10.00	mir-1287	Homo sapiens	1	10	1	10	0	0	0	0	0	0	10
10.00	mir-181c	Homo sapiens	5	6	5	6	0	4	0	4	0	0	10
10.00	mir-212	Homo sapiens	5	6	5	6	0	0	0	0	4	4	10
10.00	mir-147b	Homo sapiens	0	1	0	1	0	9	0	9	0	0	10
10.00	mir-107	Homo sapiens	0	0	0	0	0	1	0	1	8	9	10
10.00	mir-187	Homo sapiens	0	0	0	0	0	7	0	7	3	3	10
10.00	mir-320c-1	Homo sapiens	0	0	0	0	4	10	0	0	0	0	10
10.00	mir-320c-2	Homo sapiens	0	0	0	0	4	10	0	0	0	0	10
9.00	mir-10527	Homo sapiens	3	9	3	9	0	0	0	0	0	0	9
9.00	mir-145	Homo sapiens	0	0	0	0	0	9	0	9	0	0	9
9.00	mir-671	Homo sapiens	0	0	0	0	3	9	3	9	0	0	9
9.00	mir-1304	Homo sapiens	0	0	0	0	0	0	0	0	5	9	9
8.00	mir-215	Homo sapiens	1	8	1	7	0	0	0	0	0	0	8
8.00	mir-660	Homo sapiens	0	8	0	8	0	0	0	0	0	0	8
8.00	mir-3158-1	Homo sapiens	0	8	0	0	0	0	0	0	0	0	8
8.00	mir-3158-2	Homo sapiens	0	8	0	0	0	0	0	0	0	0	8
8.00	mir-642b	Homo sapiens	2	8	2	8	0	0	0	0	0	0	8
8.00	mir-103a-2	Homo sapiens	0	0	0	0	0	1	0	0	7	7	8
8.00	mir-1285-2	Homo sapiens	0	0	0	0	0	1	0	0	1	7	8
8.00	mir-3135a	Homo sapiens	0	0	0	0	0	0	0	0	0	8	8
7.00	mir-934	Homo sapiens	0	7	0	7	0	0	0	0	0	0	7
7.00	mir-455	Homo sapiens	0	6	0	6	0	1	0	1	0	0	7
7.00	mir-3614	Homo sapiens	0	4	0	4	0	1	0	1	2	2	7
7.00	mir-197	Homo sapiens	0	1	0	1	4	6	4	6	0	0	7
7.00	mir-103a-1	Homo sapiens	0	0	0	0	0	0	0	0	7	7	7
7.00	mir-378c	Homo sapiens	0	0	0	0	0	0	0	0	4	7	7
7.00	mir-4448	Homo sapiens	0	0	0	0	0	5	0	5	0	2	7
6.00	mir-942	Homo sapiens	0	6	0	6	0	0	0	0	0	0	6
6.00	mir-3150a	Homo sapiens	0	6	0	6	0	0	0	0	0	0	6
6.00	mir-1293	Homo sapiens	0	4	0	4	0	0	0	0	2	2	6
6.00	mir-503	Homo sapiens	0	0	0	0	0	0	0	0	6	6	6
6.00	mir-3665	Homo sapiens	0	0	0	0	0	0	0	0	0	6	6
6.00	mir-6503	Homo sapiens	0	0	0	0	0	5	0	5	0	1	6
6.00	mir-7854	Homo sapiens	0	0	0	0	3	3	3	3	1	3	6
6.00	mir-3648-2	Homo sapiens	0	0	0	0	0	0	0	0	5	6	6
5.00	mir-20b	Homo sapiens	4	5	4	5	0	0	0	0	0	0	5
5.00	mir-3913-1	Homo sapiens	0	5	0	0	0	0	0	0	0	0	5
5.00	mir-6744	Homo sapiens	0	5	0	5	0	0	0	0	0	0	5
5.00	mir-7704	Homo sapiens	0	5	0	5	0	0	0	0	0	0	5
5.00	mir-584	Homo sapiens	0	4	0	4	0	1	0	1	0	0	5
5.00	mir-548ad	Homo sapiens	0	4	0	4	0	0	0	0	0	1	5
5.00	mir-15a	Homo sapiens	0	3	0	3	0	0	0	0	2	2	5
5.00	mir-195	Homo sapiens	1	3	1	2	0	2	0	2	0	0	5
5.00	mir-505	Homo sapiens	0	2	0	2	0	2	0	2	1	1	5
5.00	mir-766	Homo sapiens	0	2	0	2	0	0	0	0	3	3	5
5.00	mir-204	Homo sapiens	0	1	0	1	0	1	0	1	3	3	5
5.00	mir-324	Homo sapiens	1	1	1	1	0	0	0	0	1	4	5
5.00	mir-2115	Homo sapiens	0	1	0	1	4	4	4	4	0	0	5
5.00	mir-1-1	Homo sapiens	0	0	0	0	1	2	0	0	3	3	5
5.00	mir-598	Homo sapiens	0	0	0	0	0	2	0	2	3	3	5
5.00	mir-542	Homo sapiens	0	0	0	0	2	5	2	5	0	0	5
5.00	mir-1295a	Homo sapiens	0	0	0	0	5	5	5	5	0	0	5
5.00	mir-1303	Homo sapiens	0	0	0	0	1	2	1	2	0	3	5
5.00	mir-1248	Homo sapiens	0	0	0	0	0	0	0	0	5	5	5
5.00	mir-1306	Homo sapiens	0	0	0	0	0	2	0	2	2	3	5
5.00	mir-320d-1	Homo sapiens	0	0	0	0	3	5	0	2	0	0	5
5.00	mir-3648-1	Homo sapiens	0	0	0	0	0	0	0	0	5	5	5
5.00	mir-3908	Homo sapiens	0	0	0	0	0	0	0	0	0	5	5
5.00	mir-4664	Homo sapiens	0	0	0	0	3	5	3	5	0	0	5
5.00	mir-9902-1	Homo sapiens	0	0	0	0	0	0	0	0	3	5	5
4.00	mir-144	Homo sapiens	1	4	1	4	0	0	0	0	0	0	4
4.00	mir-196b	Homo sapiens	2	4	2	4	0	0	0	0	0	0	4
4.00	mir-589	Homo sapiens	0	4	0	4	0	0	0	0	0	0	4
4.00	mir-378d-2	Homo sapiens	1	4	1	4	0	0	0	0	0	0	4
4.00	mir-3913-2	Homo sapiens	0	4	0	0	0	0	0	0	0	0	4
4.00	mir-3616	Homo sapiens	0	3	0	3	0	0	0	0	1	1	4
4.00	mir-18a	Homo sapiens	1	1	1	1	0	2	0	2	1	1	4
4.00	mir-3679	Homo sapiens	0	1	0	1	0	0	0	0	2	3	4
4.00	mir-203a	Homo sapiens	0	0	0	0	0	3	0	3	0	1	4
4.00	mir-508	Homo sapiens	0	0	0	0	0	3	0	3	1	1	4
4.00	mir-548e	Homo sapiens	0	0	0	0	0	4	0	4	0	0	4
4.00	mir-548o	Homo sapiens	0	0	0	0	3	4	0	0	0	0	4
4.00	mir-1277	Homo sapiens	0	0	0	0	0	2	0	2	2	2	4
4.00	mir-3605	Homo sapiens	0	0	0	0	0	4	0	4	0	0	4
4.00	mir-548o-2	Homo sapiens	0	0	0	0	3	4	0	0	0	0	4
4.00	mir-4485	Homo sapiens	0	0	0	0	0	1	0	1	0	3	4
3.00	mir-422a	Homo sapiens	0	3	0	3	0	0	0	0	0	0	3
3.00	mir-548f-1	Homo sapiens	1	3	1	3	0	0	0	0	0	0	3
3.00	mir-4516	Homo sapiens	0	3	0	3	0	0	0	0	0	0	3
3.00	mir-6515	Homo sapiens	0	3	0	3	0	0	0	0	0	0	3
3.00	mir-6516	Homo sapiens	0	3	0	3	0	0	0	0	0	0	3
3.00	mir-301a	Homo sapiens	1	2	1	2	0	0	0	0	1	1	3
3.00	mir-454	Homo sapiens	0	2	0	2	0	1	0	1	0	0	3
3.00	mir-4999	Homo sapiens	0	2	0	2	0	1	0	1	0	0	3
3.00	mir-500a	Homo sapiens	0	1	0	1	2	2	2	2	0	0	3
3.00	mir-513c	Homo sapiens	0	1	0	1	0	0	0	0	2	2	3
3.00	mir-4724	Homo sapiens	0	1	0	1	0	0	0	0	0	2	3
3.00	mir-3690-2	Homo sapiens	0	1	0	0	0	0	0	0	1	2	3
3.00	mir-1-2	Homo sapiens	0	0	0	0	0	1	0	0	2	2	3
3.00	mir-130b	Homo sapiens	0	0	0	0	0	3	0	3	0	0	3
3.00	mir-599	Homo sapiens	0	0	0	0	0	0	0	0	3	3	3
3.00	mir-627	Homo sapiens	0	0	0	0	1	3	1	3	0	0	3
3.00	mir-548f-2	Homo sapiens	0	0	0	0	0	3	0	0	0	0	3
3.00	mir-320d-2	Homo sapiens	0	0	0	0	2	3	0	0	0	0	3
3.00	mir-378f	Homo sapiens	0	0	0	0	0	3	0	3	0	0	3
3.00	mir-4454	Homo sapiens	0	0	0	0	0	0	0	0	2	3	3
3.00	mir-4658	Homo sapiens	0	0	0	0	0	0	0	0	3	3	3
3.00	mir-9902-2	Homo sapiens	0	0	0	0	0	0	0	0	2	3	3
2.00	mir-106a	Homo sapiens	0	2	0	2	0	0	0	0	0	0	2
2.00	mir-196a-1	Homo sapiens	1	2	0	0	0	0	0	0	0	0	2
2.00	mir-122	Homo sapiens	1	2	1	2	0	0	0	0	0	0	2
2.00	mir-561	Homo sapiens	0	2	0	2	0	0	0	0	0	0	2
2.00	mir-577	Homo sapiens	2	2	2	2	0	0	0	0	0	0	2
2.00	mir-548b	Homo sapiens	0	2	0	2	0	0	0	0	0	0	2
2.00	mir-641	Homo sapiens	0	2	0	2	0	0	0	0	0	0	2
2.00	mir-548d-1	Homo sapiens	0	2	0	0	0	0	0	0	0	0	2
2.00	mir-1468	Homo sapiens	0	2	0	2	0	0	0	0	0	0	2
2.00	mir-548g	Homo sapiens	0	2	0	0	0	0	0	0	0	0	2
2.00	mir-3173	Homo sapiens	0	2	0	2	0	0	0	0	0	0	2
2.00	mir-3620	Homo sapiens	0	2	0	2	0	0	0	0	0	0	2
2.00	mir-3622a	Homo sapiens	0	2	0	2	0	0	0	0	0	0	2
2.00	mir-378g	Homo sapiens	0	2	0	2	0	0	0	0	0	0	2
2.00	mir-4515	Homo sapiens	0	2	0	2	0	0	0	0	0	0	2
2.00	mir-4662a	Homo sapiens	2	2	2	2	0	0	0	0	0	0	2
2.00	mir-4746	Homo sapiens	0	2	0	2	0	0	0	0	0	0	2
2.00	mir-9985	Homo sapiens	0	2	0	2	0	0	0	0	0	0	2
2.00	mir-17	Homo sapiens	0	1	0	1	0	1	0	1	0	0	2
2.00	mir-214	Homo sapiens	0	1	0	1	0	1	0	1	0	0	2
2.00	mir-664a	Homo sapiens	0	1	0	1	0	1	0	1	0	0	2
2.00	mir-93	Homo sapiens	0	0	0	0	0	2	0	2	0	0	2
2.00	mir-381	Homo sapiens	0	0	0	0	2	2	2	2	0	0	2
2.00	mir-597	Homo sapiens	0	0	0	0	0	0	0	0	1	2	2
2.00	mir-877	Homo sapiens	0	0	0	0	0	0	0	0	2	2	2
2.00	mir-548f-3	Homo sapiens	0	0	0	0	0	2	0	0	0	0	2
2.00	mir-1288	Homo sapiens	0	0	0	0	2	2	2	2	0	0	2
2.00	mir-1273c	Homo sapiens	0	0	0	0	0	0	0	0	0	2	2
2.00	mir-3194	Homo sapiens	0	0	0	0	0	0	0	0	1	2	2
2.00	mir-4326	Homo sapiens	0	0	0	0	0	0	0	0	1	2	2
2.00	mir-4449	Homo sapiens	0	0	0	0	0	0	0	0	2	2	2
2.00	mir-4452	Homo sapiens	0	0	0	0	0	0	0	0	0	2	2
2.00	mir-4474	Homo sapiens	0	0	0	0	0	2	0	2	0	0	2
2.00	mir-5588	Homo sapiens	0	0	0	0	0	0	0	0	0	2	2
2.00	mir-8485	Homo sapiens	0	0	0	0	0	1	0	1	0	1	2
1.00	mir-129-1	Homo sapiens	1	1	0	0	0	0	0	0	0	0	1
1.00	mir-139	Homo sapiens	1	1	1	1	0	0	0	0	0	0	1
1.00	mir-10b	Homo sapiens	0	1	0	1	0	0	0	0	0	0	1
1.00	mir-34a	Homo sapiens	1	1	1	1	0	0	0	0	0	0	1
1.00	mir-196a-2	Homo sapiens	0	1	0	0	0	0	0	0	0	0	1
1.00	mir-153-2	Homo sapiens	0	1	0	1	0	0	0	0	0	0	1
1.00	mir-188	Homo sapiens	1	1	1	1	0	0	0	0	0	0	1
1.00	mir-382	Homo sapiens	1	1	1	1	0	0	0	0	0	0	1
1.00	mir-331	Homo sapiens	0	1	0	1	0	0	0	0	0	0	1
1.00	mir-504	Homo sapiens	1	1	1	1	0	0	0	0	0	0	1
1.00	mir-556	Homo sapiens	0	1	0	1	0	0	0	0	0	0	1
1.00	mir-581	Homo sapiens	0	1	0	1	0	0	0	0	0	0	1
1.00	mir-550a-2	Homo sapiens	0	1	0	0	0	0	0	0	0	0	1
1.00	mir-624	Homo sapiens	0	1	0	1	0	0	0	0	0	0	1
1.00	mir-548d-2	Homo sapiens	0	1	0	0	0	0	0	0	0	0	1
1.00	mir-659	Homo sapiens	0	1	0	1	0	0	0	0	0	0	1
1.00	mir-1271	Homo sapiens	0	1	0	1	0	0	0	0	0	0	1
1.00	mir-450b	Homo sapiens	1	1	1	1	0	0	0	0	0	0	1
1.00	mir-939	Homo sapiens	0	1	0	1	0	0	0	0	0	0	1
1.00	mir-1228	Homo sapiens	0	1	0	1	0	0	0	0	0	0	1
1.00	mir-548j	Homo sapiens	1	1	1	1	0	0	0	0	0	0	1
1.00	mir-548k	Homo sapiens	0	1	0	1	0	0	0	0	0	0	1
1.00	mir-1255a	Homo sapiens	0	1	0	1	0	0	0	0	0	0	1
1.00	mir-1262	Homo sapiens	0	1	0	1	0	0	0	0	0	0	1
1.00	mir-548i-1	Homo sapiens	0	1	0	0	0	0	0	0	0	0	1
1.00	mir-548i-2	Homo sapiens	1	1	0	0	0	0	0	0	0	0	1
1.00	mir-548i-4	Homo sapiens	0	1	0	0	0	0	0	0	0	0	1
1.00	mir-1908	Homo sapiens	0	1	0	1	0	0	0	0	0	0	1
1.00	mir-2277	Homo sapiens	0	1	0	1	0	0	0	0	0	0	1
1.00	mir-3120	Homo sapiens	0	1	0	1	0	0	0	0	0	0	1
1.00	mir-3174	Homo sapiens	0	1	0	1	0	0	0	0	0	0	1
1.00	mir-3065	Homo sapiens	1	1	1	1	0	0	0	0	0	0	1
1.00	mir-548x	Homo sapiens	0	1	0	0	0	0	0	0	0	0	1
1.00	mir-3617	Homo sapiens	0	1	0	1	0	0	0	0	0	0	1
1.00	mir-3664	Homo sapiens	0	1	0	1	0	0	0	0	0	0	1
1.00	mir-3918	Homo sapiens	0	1	0	1	0	0	0	0	0	0	1
1.00	mir-374c	Homo sapiens	0	1	0	1	0	0	0	0	0	0	1
1.00	mir-548aj-2	Homo sapiens	0	1	0	0	0	0	0	0	0	0	1
1.00	mir-4659a	Homo sapiens	0	1	0	1	0	0	0	0	0	0	1
1.00	mir-4661	Homo sapiens	0	1	0	1	0	0	0	0	0	0	1
1.00	mir-4772	Homo sapiens	0	1	0	1	0	0	0	0	0	0	1
1.00	mir-4775	Homo sapiens	1	1	1	1	0	0	0	0	0	0	1
1.00	mir-548ap	Homo sapiens	0	1	0	1	0	0	0	0	0	0	1
1.00	mir-548ay	Homo sapiens	0	1	0	1	0	0	0	0	0	0	1
1.00	mir-6764	Homo sapiens	1	1	1	1	0	0	0	0	0	0	1
1.00	mir-6805	Homo sapiens	0	1	0	1	0	0	0	0	0	0	1
1.00	mir-6859-1	Homo sapiens	0	1	0	0	0	0	0	0	0	0	1
1.00	mir-6866	Homo sapiens	0	1	0	1	0	0	0	0	0	0	1
1.00	mir-7850	Homo sapiens	0	1	0	1	0	0	0	0	0	0	1
1.00	mir-6859-3	Homo sapiens	0	1	0	0	0	0	0	0	0	0	1
1.00	mir-10396a	Homo sapiens	1	1	1	1	0	0	0	0	0	0	1
1.00	mir-211	Homo sapiens	0	0	0	0	0	0	0	0	0	1	1
1.00	mir-219a-1	Homo sapiens	0	0	0	0	0	0	0	0	1	1	1
1.00	mir-127	Homo sapiens	0	0	0	0	0	1	0	1	0	0	1
1.00	mir-296	Homo sapiens	0	0	0	0	0	1	0	1	0	0	1
1.00	mir-370	Homo sapiens	0	0	0	0	0	1	0	1	0	0	1
1.00	mir-326	Homo sapiens	0	0	0	0	0	1	0	1	0	0	1
1.00	mir-492	Homo sapiens	0	0	0	0	0	0	0	0	1	1	1
1.00	mir-509-1	Homo sapiens	0	0	0	0	0	1	0	0	0	0	1
1.00	mir-552	Homo sapiens	0	0	0	0	0	1	0	1	0	0	1
1.00	mir-874	Homo sapiens	0	0	0	0	1	1	1	1	0	0	1
1.00	mir-887	Homo sapiens	0	0	0	0	0	0	0	0	1	1	1
1.00	mir-873	Homo sapiens	0	0	0	0	0	0	0	0	0	1	1
1.00	mir-937	Homo sapiens	0	0	0	0	0	1	0	1	0	0	1
1.00	mir-944	Homo sapiens	0	0	0	0	0	1	0	1	0	0	1
1.00	mir-1289-1	Homo sapiens	0	0	0	0	0	1	0	0	0	0	1
1.00	mir-1291	Homo sapiens	0	0	0	0	0	0	0	0	1	1	1
1.00	mir-1267	Homo sapiens	0	0	0	0	0	0	0	0	0	1	1
1.00	mir-1268a	Homo sapiens	0	0	0	0	0	0	0	0	0	1	1
1.00	mir-1269a	Homo sapiens	0	0	0	0	0	0	0	0	1	1	1
1.00	mir-1270	Homo sapiens	0	0	0	0	0	0	0	0	0	1	1
1.00	mir-548h-1	Homo sapiens	0	0	0	0	0	0	0	0	0	1	1
1.00	mir-1278	Homo sapiens	0	0	0	0	1	1	1	1	0	0	1
1.00	mir-2114	Homo sapiens	0	0	0	0	0	1	0	1	0	0	1
1.00	mir-3157	Homo sapiens	0	0	0	0	0	1	0	1	0	0	1
1.00	mir-3179-1	Homo sapiens	0	0	0	0	0	1	0	0	0	0	1
1.00	mir-3180-3	Homo sapiens	0	0	0	0	1	1	0	0	0	0	1
1.00	mir-320e	Homo sapiens	0	0	0	0	0	0	0	0	0	1	1
1.00	mir-3190	Homo sapiens	0	0	0	0	0	0	0	0	0	1	1
1.00	mir-3196	Homo sapiens	0	0	0	0	0	0	0	0	0	1	1
1.00	mir-4321	Homo sapiens	0	0	0	0	0	1	0	1	0	0	1
1.00	mir-2355	Homo sapiens	0	0	0	0	1	1	1	1	0	0	1
1.00	mir-3690-1	Homo sapiens	0	0	0	0	0	0	0	0	1	1	1
1.00	mir-3927	Homo sapiens	0	0	0	0	0	1	0	1	0	0	1
1.00	mir-676	Homo sapiens	0	0	0	0	0	1	0	1	0	0	1
1.00	mir-3928	Homo sapiens	0	0	0	0	0	1	0	1	0	0	1
1.00	mir-548z	Homo sapiens	0	0	0	0	0	1	0	0	0	0	1
1.00	mir-378d-1	Homo sapiens	0	0	0	0	0	0	0	0	0	1	1
1.00	mir-4440	Homo sapiens	0	0	0	0	0	0	0	0	0	1	1
1.00	mir-548ah	Homo sapiens	0	0	0	0	1	1	1	1	0	0	1
1.00	mir-4512	Homo sapiens	0	0	0	0	0	0	0	0	0	1	1
1.00	mir-4677	Homo sapiens	0	0	0	0	0	1	0	1	0	0	1
1.00	mir-4687	Homo sapiens	0	0	0	0	0	0	0	0	1	1	1
1.00	mir-4706	Homo sapiens	0	0	0	0	0	0	0	0	1	1	1
1.00	mir-451b	Homo sapiens	0	0	0	0	0	0	0	0	1	1	1
1.00	mir-4779	Homo sapiens	0	0	0	0	0	0	0	0	1	1	1
1.00	mir-4781	Homo sapiens	0	0	0	0	0	0	0	0	1	1	1
1.00	mir-5003	Homo sapiens	0	0	0	0	0	1	0	1	0	0	1
1.00	mir-5009	Homo sapiens	0	0	0	0	0	0	0	0	0	1	1
1.00	mir-5091	Homo sapiens	0	0	0	0	0	0	0	0	1	1	1
1.00	mir-5194	Homo sapiens	0	0	0	0	0	0	0	0	1	1	1
1.00	mir-5580	Homo sapiens	0	0	0	0	0	1	0	1	0	0	1
1.00	mir-5585	Homo sapiens	0	0	0	0	0	1	0	1	0	0	1
1.00	mir-1295b	Homo sapiens	0	0	0	0	0	1	0	1	0	0	1
1.00	mir-5695	Homo sapiens	0	0	0	0	0	1	0	1	0	0	1
1.00	mir-6127	Homo sapiens	0	0	0	0	0	0	0	0	0	1	1
1.00	mir-6718	Homo sapiens	0	0	0	0	0	0	0	0	1	1	1
1.00	mir-6753	Homo sapiens	0	0	0	0	0	1	0	1	0	0	1
1.00	mir-6787	Homo sapiens	0	0	0	0	0	1	0	1	0	0	1
1.00	mir-6819	Homo sapiens	0	0	0	0	1	1	1	1	0	0	1
1.00	mir-6843	Homo sapiens	0	0	0	0	1	1	1	1	0	0	1
1.00	mir-7110	Homo sapiens	0	0	0	0	0	0	0	0	0	1	1
1.00	mir-7155	Homo sapiens	0	0	0	0	0	1	0	1	0	0	1
1.00	mir-7515	Homo sapiens	0	0	0	0	0	0	0	0	0	1	1
1.00	mir-7974	Homo sapiens	0	0	0	0	1	1	1	1	0	0	1
1.00	mir-3179-4	Homo sapiens	0	0	0	0	0	0	0	0	0	1	1
1.00	mir-9903	Homo sapiens	0	0	0	0	0	1	0	1	0	0	1
1.00	mir-12136	Homo sapiens	0	0	0	0	0	0	0	0	1	1	1
0.00	mir-129-2	Homo sapiens	0	0	0	0	0	0	0	0	0	0	0
0.00	mir-550a-1	Homo sapiens	0	0	0	0	0	0	0	0	0	0	0
0.00	mir-151b	Homo sapiens	0	0	0	0	0	0	0	0	0	0	0
0.00	mir-509-2	Homo sapiens	0	0	0	0	0	0	0	0	0	0	0
0.00	mir-1289-2	Homo sapiens	0	0	0	0	0	0	0	0	0	0	0
0.00	mir-548f-4	Homo sapiens	0	0	0	0	0	0	0	0	0	0	0
0.00	mir-548n	Homo sapiens	0	0	0	0	0	0	0	0	0	0	0
0.00	mir-548h-2	Homo sapiens	0	0	0	0	0	0	0	0	0	0	0
0.00	mir-548h-4	Homo sapiens	0	0	0	0	0	0	0	0	0	0	0
0.00	mir-548i-3	Homo sapiens	0	0	0	0	0	0	0	0	0	0	0
0.00	mir-548t	Homo sapiens	0	0	0	0	0	0	0	0	0	0	0
0.00	mir-3180-1	Homo sapiens	0	0	0	0	0	0	0	0	0	0	0
0.00	mir-3180-2	Homo sapiens	0	0	0	0	0	0	0	0	0	0	0
0.00	mir-3179-2	Homo sapiens	0	0	0	0	0	0	0	0	0	0	0
0.00	mir-3179-3	Homo sapiens	0	0	0	0	0	0	0	0	0	0	0
0.00	mir-548w	Homo sapiens	0	0	0	0	0	0	0	0	0	0	0
0.00	mir-514b	Homo sapiens	0	0	0	0	0	0	0	0	0	0	0
0.00	mir-548aa-1	Homo sapiens	0	0	0	0	0	0	0	0	0	0	0
0.00	mir-548aa-2	Homo sapiens	0	0	0	0	0	0	0	0	0	0	0
0.00	mir-548ab	Homo sapiens	0	0	0	0	0	0	0	0	0	0	0
0.00	mir-6859-2	Homo sapiens	0	0	0	0	0	0	0	0	0	0	0
0.00	mir-6859-4	Homo sapiens	0	0	0	0	0	0	0	0	0	0	0

## Sheet: H5
Expression values	Name	Resource	Exact mature 5'	Mature 5'	Unique exact mature 5'	Unique mature 5'	Exact mature 3'	Mature 3'	Unique exact mature 3'	Unique mature 3'	Exact other	Other	Total
39,051.00	mir-148a	Homo sapiens	13	19	13	19	35174	38953	35174	38909	74	79	39051
30,402.00	mir-21	Homo sapiens	9904	29952	9904	29952	7	9	7	9	406	441	30402
29,031.00	mir-200a	Homo sapiens	460	866	460	866	3	27965	3	27934	185	200	29031
13,930.00	mir-99a	Homo sapiens	282	13866	282	13848	0	0	0	0	54	64	13930
12,875.00	mir-34c	Homo sapiens	875	10715	875	10712	94	202	94	202	1850	1958	12875
12,337.00	mir-200b	Homo sapiens	62	177	62	177	1674	12117	1674	12103	22	43	12337
8,516.00	let-7i	Homo sapiens	6365	8020	6365	8015	0	3	0	3	453	493	8516
6,497.00	mir-200c	Homo sapiens	0	0	0	0	2012	6331	2012	6317	155	166	6497
6,414.00	let-7b	Homo sapiens	1986	5571	1986	5567	0	3	0	3	788	840	6414
5,626.00	mir-151a	Homo sapiens	49	78	49	78	3375	5507	3375	5507	26	41	5626
5,074.00	mir-27a	Homo sapiens	6	13	6	13	15	5058	15	5036	3	3	5074
4,640.00	mir-27b	Homo sapiens	0	0	0	0	289	4634	289	4613	0	6	4640
3,982.00	mir-10400	Homo sapiens	0	3978	0	3978	0	0	0	0	0	4	3982
3,057.00	let-7f-2	Homo sapiens	315	3002	0	87	0	1	0	1	51	54	3057
3,047.00	mir-30d	Homo sapiens	520	2893	520	2891	3	11	3	10	122	143	3047
3,023.00	let-7g	Homo sapiens	505	2953	505	2941	0	0	0	0	61	70	3023
2,990.00	let-7f-1	Homo sapiens	314	2920	0	7	1	2	1	2	63	68	2990
2,461.00	mir-3074	Homo sapiens	0	2404	0	2404	0	55	0	55	2	2	2461
2,174.00	let-7c	Homo sapiens	983	1982	983	1967	0	0	0	0	182	192	2174
2,028.00	let-7a-1	Homo sapiens	154	1900	0	3	5	18	0	0	92	110	2028
2,025.00	let-7a-3	Homo sapiens	154	1895	0	2	4	15	0	0	93	115	2025
1,997.00	let-7a-2	Homo sapiens	154	1893	0	0	0	0	0	0	88	104	1997
1,975.00	mir-146a	Homo sapiens	609	1969	609	1953	0	0	0	0	6	6	1975
1,867.00	mir-26a-2	Homo sapiens	1277	1831	0	0	0	0	0	0	34	36	1867
1,864.00	mir-26a-1	Homo sapiens	1276	1828	0	0	0	0	0	0	34	36	1864
1,786.00	mir-3960	Homo sapiens	0	0	0	0	0	56	0	56	1	1730	1786
1,495.00	mir-375	Homo sapiens	0	0	0	0	304	1340	304	1340	141	155	1495
1,486.00	mir-429	Homo sapiens	0	0	0	0	502	1474	502	1474	11	12	1486
1,394.00	mir-30a	Homo sapiens	341	1083	341	1080	54	209	54	204	81	102	1394
1,126.00	mir-22	Homo sapiens	2	121	2	121	365	872	365	872	120	133	1126
1,082.00	mir-203b	Homo sapiens	1	1081	1	1081	0	0	0	0	0	1	1082
989.00	mir-423	Homo sapiens	244	675	244	675	111	227	111	227	75	87	989
972.00	mir-29a	Homo sapiens	0	0	0	0	11	761	11	760	199	211	972
953.00	mir-8072	Homo sapiens	0	0	0	0	0	0	0	0	1	953	953
951.00	mir-25	Homo sapiens	0	4	0	4	563	941	563	941	3	6	951
886.00	mir-320a	Homo sapiens	0	0	0	0	308	863	308	837	4	23	886
871.00	mir-26b	Homo sapiens	437	867	437	867	0	4	0	4	0	0	871
844.00	mir-141	Homo sapiens	7	14	7	14	0	710	0	683	111	120	844
823.00	mir-146b	Homo sapiens	349	808	349	790	1	5	1	5	8	10	823
821.00	mir-100	Homo sapiens	7	800	7	782	0	0	0	0	18	21	821
784.00	mir-205	Homo sapiens	144	775	144	775	0	0	0	0	2	9	784
700.00	mir-142	Homo sapiens	28	123	28	123	6	41	6	41	491	536	700
659.00	mir-222	Homo sapiens	0	1	0	1	344	613	344	613	34	45	659
627.00	mir-449c	Homo sapiens	87	602	87	602	0	1	0	1	8	24	627
586.00	mir-449a	Homo sapiens	322	522	322	514	0	0	0	0	54	64	586
549.00	mir-186	Homo sapiens	111	533	111	533	0	0	0	0	15	16	549
527.00	mir-92b	Homo sapiens	0	63	0	63	94	358	94	354	66	106	527
522.00	mir-34b	Homo sapiens	0	17	0	16	4	498	4	498	4	7	522
515.00	mir-30e	Homo sapiens	62	308	62	306	50	145	50	141	52	62	515
507.00	mir-1246	Homo sapiens	10	507	10	507	0	0	0	0	0	0	507
503.00	mir-182	Homo sapiens	44	401	44	401	0	4	0	4	94	98	503
487.00	mir-183	Homo sapiens	295	487	295	487	0	0	0	0	0	0	487
486.00	mir-191	Homo sapiens	153	443	153	443	0	0	0	0	38	43	486
482.00	mir-99b	Homo sapiens	114	405	114	405	26	51	26	51	23	26	482
479.00	mir-1180	Homo sapiens	0	0	0	0	197	440	197	440	35	39	479
469.00	mir-451a	Homo sapiens	0	469	0	469	0	0	0	0	0	0	469
469.00	mir-181a-2	Homo sapiens	17	320	0	0	1	8	1	8	130	141	469
460.00	mir-181a-1	Homo sapiens	17	322	0	0	0	0	0	0	128	138	460
453.00	mir-148b	Homo sapiens	0	8	0	8	177	438	177	395	6	7	453
414.00	mir-221	Homo sapiens	0	45	0	45	13	244	13	244	111	125	414
378.00	mir-361	Homo sapiens	7	22	7	22	36	333	36	333	21	23	378
367.00	mir-378a	Homo sapiens	0	0	0	0	2	367	2	367	0	0	367
361.00	mir-125a	Homo sapiens	10	273	10	273	1	13	1	13	69	75	361
356.00	mir-101-2	Homo sapiens	0	0	0	0	53	345	0	41	7	11	356
333.00	mir-223	Homo sapiens	1	38	1	38	52	284	52	284	9	11	333
332.00	let-7d	Homo sapiens	0	317	0	310	0	6	0	6	7	9	332
329.00	mir-140	Homo sapiens	28	45	28	45	28	220	28	220	17	64	329
326.00	mir-128-1	Homo sapiens	0	1	0	1	90	324	0	100	0	1	326
310.00	mir-101-1	Homo sapiens	0	1	0	1	53	296	0	3	7	13	310
267.00	mir-340	Homo sapiens	109	242	109	242	2	23	2	23	2	2	267
266.00	mir-28	Homo sapiens	23	90	23	90	62	164	62	164	10	12	266
264.00	mir-2110	Homo sapiens	25	229	25	229	0	0	0	0	18	35	264
262.00	mir-125b-1	Homo sapiens	20	199	0	2	1	16	1	16	46	47	262
260.00	mir-125b-2	Homo sapiens	19	202	0	0	0	9	0	9	46	49	260
258.00	mir-224	Homo sapiens	0	201	0	201	0	4	0	4	46	53	258
253.00	mir-3159	Homo sapiens	0	0	0	0	0	0	0	0	42	253	253
248.00	mir-192	Homo sapiens	41	177	41	176	0	0	0	0	51	71	248
228.00	mir-143	Homo sapiens	0	0	0	0	155	228	155	228	0	0	228
214.00	mir-128-2	Homo sapiens	0	0	0	0	90	214	0	0	0	0	214
193.00	mir-152	Homo sapiens	0	0	0	0	32	190	32	190	0	3	193
184.00	mir-1285-1	Homo sapiens	0	0	0	0	0	0	0	0	30	184	184
174.00	mir-8086	Homo sapiens	0	0	0	0	0	0	0	0	7	174	174
169.00	mir-532	Homo sapiens	108	167	108	167	0	2	0	2	0	0	169
165.00	mir-342	Homo sapiens	28	130	28	130	3	33	3	33	0	2	165
163.00	mir-16-2	Homo sapiens	19	92	0	0	0	58	0	58	12	13	163
156.00	mir-7-1	Homo sapiens	93	120	0	4	2	2	2	2	32	34	156
152.00	mir-7-3	Homo sapiens	93	119	0	0	0	0	0	0	32	33	152
151.00	mir-98	Homo sapiens	71	114	71	112	0	0	0	0	33	37	151
148.00	mir-7-2	Homo sapiens	93	115	0	0	0	0	0	0	32	33	148
145.00	mir-135b	Homo sapiens	124	142	124	142	1	1	1	1	2	2	145
129.00	mir-619	Homo sapiens	1	49	1	49	0	0	0	0	5	80	129
128.00	mir-24-2	Homo sapiens	0	49	0	49	0	71	0	0	7	8	128
125.00	mir-363	Homo sapiens	0	0	0	0	86	125	86	125	0	0	125
122.00	mir-92a-1	Homo sapiens	1	1	1	1	48	121	0	21	0	0	122
117.00	mir-3184	Homo sapiens	0	33	0	33	0	0	0	0	77	84	117
107.00	mir-23a	Homo sapiens	0	1	0	1	0	105	0	105	0	1	107
100.00	mir-92a-2	Homo sapiens	0	0	0	0	47	100	0	3	0	0	100
99.00	mir-23b	Homo sapiens	0	16	0	16	0	41	0	41	24	42	99
97.00	mir-9-3	Homo sapiens	3	41	0	0	0	4	0	0	49	52	97
97.00	mir-181b-2	Homo sapiens	9	32	0	0	0	0	0	0	59	65	97
97.00	mir-181b-1	Homo sapiens	9	29	0	0	0	0	0	0	59	68	97
97.00	mir-24-1	Homo sapiens	0	23	0	23	0	72	0	0	2	2	97
96.00	mir-1307	Homo sapiens	3	6	3	6	0	90	0	90	0	0	96
95.00	mir-184	Homo sapiens	0	0	0	0	67	83	67	83	12	12	95
93.00	mir-9-1	Homo sapiens	4	39	0	0	0	3	0	0	49	51	93
90.00	mir-16-1	Homo sapiens	20	90	0	0	0	0	0	0	0	0	90
87.00	mir-9-2	Homo sapiens	3	35	0	0	0	3	0	0	48	49	87
86.00	mir-218-2	Homo sapiens	37	86	0	0	0	0	0	0	0	0	86
81.00	mir-3929	Homo sapiens	0	0	0	0	0	0	0	0	1	81	81
80.00	mir-190b	Homo sapiens	39	80	39	80	0	0	0	0	0	0	80
79.00	mir-218-1	Homo sapiens	36	79	0	0	0	0	0	0	0	0	79
79.00	mir-425	Homo sapiens	4	71	4	71	0	3	0	3	4	5	79
77.00	mir-1843	Homo sapiens	2	71	2	71	0	0	0	0	0	6	77
76.00	mir-155	Homo sapiens	1	71	1	71	0	0	0	0	4	5	76
75.00	mir-3615	Homo sapiens	0	0	0	0	1	69	1	69	2	6	75
74.00	mir-744	Homo sapiens	10	73	10	73	0	1	0	1	0	0	74
73.00	mir-30c-2	Homo sapiens	30	55	0	0	0	4	0	4	14	14	73
72.00	mir-499a	Homo sapiens	4	72	4	72	0	0	0	0	0	0	72
68.00	mir-103b-1	Homo sapiens	26	61	0	0	0	0	0	0	4	7	68
66.00	mir-30c-1	Homo sapiens	30	52	0	0	0	0	0	0	13	14	66
65.00	mir-106b	Homo sapiens	0	5	0	5	11	43	11	43	15	17	65
64.00	mir-103b-2	Homo sapiens	26	60	0	0	0	0	0	0	4	4	64
63.00	mir-1273h	Homo sapiens	0	3	0	3	1	2	1	2	1	58	63
61.00	mir-32	Homo sapiens	34	56	34	56	0	4	0	4	1	1	61
59.00	let-7e	Homo sapiens	5	57	5	52	0	0	0	0	0	2	59
57.00	mir-3135b	Homo sapiens	0	12	0	12	0	0	0	0	2	45	57
56.00	mir-708	Homo sapiens	0	2	0	2	2	48	2	48	5	6	56
56.00	mir-7851	Homo sapiens	0	0	0	0	0	0	0	0	0	56	56
55.00	mir-132	Homo sapiens	0	17	0	17	0	24	0	24	12	14	55
53.00	mir-185	Homo sapiens	2	47	2	47	0	4	0	4	0	2	53
53.00	mir-1290	Homo sapiens	0	0	0	0	0	52	0	52	0	1	53
52.00	mir-96	Homo sapiens	37	51	37	51	0	0	0	0	1	1	52
51.00	mir-95	Homo sapiens	0	0	0	0	6	51	6	51	0	0	51
48.00	mir-769	Homo sapiens	26	48	26	48	0	0	0	0	0	0	48
48.00	mir-449b	Homo sapiens	16	39	16	32	6	7	6	7	1	2	48
45.00	mir-29b-1	Homo sapiens	0	0	0	0	3	21	0	0	23	24	45
44.00	mir-126	Homo sapiens	0	0	0	0	21	44	21	44	0	0	44
43.00	mir-582	Homo sapiens	0	0	0	0	28	43	28	43	0	0	43
42.00	mir-4430	Homo sapiens	0	0	0	0	0	0	0	0	0	42	42
41.00	mir-29b-2	Homo sapiens	0	0	0	0	4	20	0	0	21	21	41
40.00	mir-30b	Homo sapiens	6	36	6	36	3	4	3	4	0	0	40
39.00	mir-1301	Homo sapiens	0	0	0	0	1	22	1	22	15	17	39
37.00	mir-345	Homo sapiens	18	34	18	34	0	0	0	0	3	3	37
36.00	mir-29c	Homo sapiens	0	10	0	10	2	18	2	16	7	8	36
34.00	mir-629	Homo sapiens	21	33	21	33	0	0	0	0	1	1	34
34.00	mir-199b	Homo sapiens	0	13	0	13	1	21	0	0	0	0	34
34.00	mir-452	Homo sapiens	4	12	4	12	0	0	0	0	15	22	34
33.00	mir-628	Homo sapiens	3	15	3	15	3	15	3	15	3	3	33
32.00	mir-3529	Homo sapiens	0	0	0	0	0	0	0	0	31	32	32
31.00	mir-31	Homo sapiens	1	31	1	31	0	0	0	0	0	0	31
31.00	mir-320b-2	Homo sapiens	0	0	0	0	0	31	0	0	0	0	31
30.00	mir-486-2	Homo sapiens	7	29	0	1	0	1	0	0	0	0	30
29.00	mir-7706	Homo sapiens	0	0	0	0	3	27	3	27	0	2	29
29.00	mir-10395	Homo sapiens	0	0	0	0	8	26	8	26	1	3	29
28.00	mir-374a	Homo sapiens	1	23	1	23	0	2	0	2	3	3	28
28.00	mir-339	Homo sapiens	3	4	3	4	1	21	1	21	3	3	28
28.00	mir-5684	Homo sapiens	0	1	0	1	0	0	0	0	0	27	28
27.00	mir-335	Homo sapiens	0	3	0	3	10	24	10	24	0	0	27
27.00	mir-652	Homo sapiens	0	0	0	0	6	27	6	27	0	0	27
27.00	mir-320b-1	Homo sapiens	0	0	0	0	0	27	0	0	0	0	27
26.00	mir-20a	Homo sapiens	21	26	21	26	0	0	0	0	0	0	26
26.00	mir-150	Homo sapiens	19	26	19	26	0	0	0	0	0	0	26
26.00	mir-328	Homo sapiens	0	0	0	0	10	26	10	26	0	0	26
26.00	mir-6510	Homo sapiens	0	0	0	0	10	26	10	26	0	0	26
26.00	mir-3648-2	Homo sapiens	0	0	0	0	0	0	0	0	22	26	26
25.00	mir-486-1	Homo sapiens	7	25	0	0	0	0	0	0	0	0	25
24.00	mir-618	Homo sapiens	15	21	15	21	0	0	0	0	3	3	24
24.00	mir-574	Homo sapiens	0	0	0	0	11	14	11	14	5	10	24
23.00	mir-3648-1	Homo sapiens	0	0	0	0	0	0	0	0	19	23	23
21.00	mir-374b	Homo sapiens	1	21	1	21	0	0	0	0	0	0	21
21.00	mir-199a-1	Homo sapiens	0	0	0	0	2	21	0	0	0	0	21
21.00	mir-199a-2	Homo sapiens	0	0	0	0	1	21	0	0	0	0	21
21.00	mir-4472-2	Homo sapiens	0	0	0	0	0	0	0	0	1	21	21
20.00	mir-194-1	Homo sapiens	1	20	0	0	0	0	0	0	0	0	20
20.00	mir-484	Homo sapiens	5	20	5	20	0	0	0	0	0	0	20
20.00	mir-378i	Homo sapiens	0	20	0	20	0	0	0	0	0	0	20
20.00	mir-6842	Homo sapiens	1	4	1	4	5	16	5	16	0	0	20
20.00	mir-3665	Homo sapiens	0	0	0	0	0	0	0	0	0	20	20
19.00	mir-194-2	Homo sapiens	0	19	0	0	0	0	0	0	0	0	19
19.00	mir-19a	Homo sapiens	0	0	0	0	0	19	0	19	0	0	19
19.00	mir-941-3	Homo sapiens	0	0	0	0	7	17	0	0	2	2	19
18.00	mir-10a	Homo sapiens	0	16	0	16	0	0	0	0	2	2	18
18.00	mir-671	Homo sapiens	0	3	0	3	7	13	7	13	2	2	18
18.00	mir-941-1	Homo sapiens	0	0	0	0	6	17	0	0	1	1	18
18.00	mir-3135a	Homo sapiens	0	0	0	0	0	0	0	0	1	18	18
17.00	mir-501	Homo sapiens	0	0	0	0	1	17	1	17	0	0	17
16.00	mir-548b	Homo sapiens	0	15	0	15	0	0	0	0	1	1	16
16.00	mir-10399	Homo sapiens	4	6	4	6	0	6	0	6	4	4	16
16.00	mir-1268a	Homo sapiens	0	0	0	0	0	0	0	0	1	16	16
15.00	mir-651	Homo sapiens	6	15	6	15	0	0	0	0	0	0	15
15.00	mir-193a	Homo sapiens	4	13	4	13	0	0	0	0	2	2	15
15.00	mir-941-4	Homo sapiens	0	0	0	0	7	14	0	0	1	1	15
15.00	mir-941-5	Homo sapiens	0	0	0	0	7	13	0	0	2	2	15
14.00	mir-338	Homo sapiens	0	14	0	14	0	0	0	0	0	0	14
14.00	mir-149	Homo sapiens	0	9	0	9	0	0	0	0	5	5	14
14.00	mir-210	Homo sapiens	0	0	0	0	3	10	3	10	1	4	14
14.00	mir-941-2	Homo sapiens	0	0	0	0	7	13	0	0	1	1	14
14.00	mir-1285-2	Homo sapiens	0	0	0	0	1	2	0	0	1	12	14
13.00	mir-330	Homo sapiens	0	9	0	9	0	2	0	2	0	2	13
13.00	mir-181d	Homo sapiens	0	8	0	8	0	0	0	0	4	5	13
13.00	mir-502	Homo sapiens	0	0	0	0	1	12	1	9	1	1	13
13.00	mir-1303	Homo sapiens	0	0	0	0	0	2	0	2	1	11	13
12.00	mir-1287	Homo sapiens	5	12	5	12	0	0	0	0	0	0	12
12.00	mir-1306	Homo sapiens	0	0	0	0	0	7	0	7	1	5	12
11.00	mir-511	Homo sapiens	5	11	5	11	0	0	0	0	0	0	11
11.00	mir-934	Homo sapiens	0	11	0	11	0	0	0	0	0	0	11
11.00	mir-3613	Homo sapiens	6	11	6	11	0	0	0	0	0	0	11
11.00	mir-455	Homo sapiens	0	9	0	9	0	0	0	0	1	2	11
11.00	mir-10396b	Homo sapiens	2	6	2	6	0	1	0	1	4	4	11
11.00	mir-760	Homo sapiens	0	0	0	0	2	11	2	11	0	0	11
11.00	mir-1269a	Homo sapiens	0	0	0	0	2	11	2	11	0	0	11
10.00	mir-589	Homo sapiens	0	10	0	10	0	0	0	0	0	0	10
10.00	mir-660	Homo sapiens	2	10	2	10	0	0	0	0	0	0	10
10.00	mir-642b	Homo sapiens	4	10	4	10	0	0	0	0	0	0	10
10.00	mir-4488	Homo sapiens	0	10	0	10	0	0	0	0	0	0	10
10.00	mir-197	Homo sapiens	0	0	0	0	8	10	8	10	0	0	10
10.00	mir-874	Homo sapiens	0	0	0	0	2	10	2	10	0	0	10
9.00	mir-34a	Homo sapiens	0	8	0	8	0	0	0	0	0	1	9
9.00	mir-3913-1	Homo sapiens	0	8	0	0	0	0	0	0	1	1	9
9.00	mir-450a-2	Homo sapiens	0	7	0	0	0	2	0	2	0	0	9
9.00	mir-625	Homo sapiens	0	5	0	5	0	4	0	4	0	0	9
9.00	mir-15b	Homo sapiens	1	3	1	3	0	5	0	5	1	1	9
9.00	mir-1273c	Homo sapiens	0	0	0	0	0	0	0	0	1	9	9
9.00	mir-4485	Homo sapiens	0	0	0	0	0	4	0	4	2	5	9
8.00	mir-556	Homo sapiens	0	8	0	8	0	0	0	0	0	0	8
8.00	mir-509-3	Homo sapiens	4	8	4	8	0	0	0	0	0	0	8
8.00	mir-424	Homo sapiens	1	4	1	4	0	4	0	4	0	0	8
8.00	mir-324	Homo sapiens	2	2	2	2	0	1	0	1	0	5	8
8.00	mir-147b	Homo sapiens	0	0	0	0	0	8	0	8	0	0	8
7.00	mir-450a-1	Homo sapiens	1	7	0	0	0	0	0	0	0	0	7
7.00	mir-378d-2	Homo sapiens	0	7	0	7	0	0	0	0	0	0	7
7.00	mir-3913-2	Homo sapiens	0	6	0	0	0	0	0	0	1	1	7
7.00	mir-10396a	Homo sapiens	4	4	4	4	0	0	0	0	3	3	7
7.00	mir-130b	Homo sapiens	0	2	0	2	0	5	0	5	0	0	7
7.00	mir-4423	Homo sapiens	0	2	0	2	0	5	0	5	0	0	7
7.00	mir-19b-1	Homo sapiens	0	0	0	0	0	7	0	0	0	0	7
7.00	mir-130a	Homo sapiens	0	0	0	0	0	6	0	6	1	1	7
7.00	mir-514a-1	Homo sapiens	0	0	0	0	5	7	0	0	0	0	7
7.00	mir-576	Homo sapiens	0	0	0	0	4	7	4	7	0	0	7
7.00	mir-598	Homo sapiens	0	0	0	0	0	2	0	2	5	5	7
7.00	mir-320c-1	Homo sapiens	0	0	0	0	1	7	0	0	0	0	7
7.00	mir-320c-2	Homo sapiens	0	0	0	0	1	7	0	0	0	0	7
7.00	mir-548o-2	Homo sapiens	0	0	0	0	6	7	0	0	0	0	7
7.00	mir-4446	Homo sapiens	0	0	0	0	3	7	3	7	0	0	7
7.00	mir-4448	Homo sapiens	0	0	0	0	0	7	0	7	0	0	7
6.00	mir-204	Homo sapiens	2	6	2	6	0	0	0	0	0	0	6
6.00	mir-7704	Homo sapiens	0	6	0	6	0	0	0	0	0	0	6
6.00	mir-4516	Homo sapiens	0	5	0	5	0	0	0	0	0	1	6
6.00	mir-331	Homo sapiens	0	3	0	3	0	0	0	0	2	3	6
6.00	mir-505	Homo sapiens	0	3	0	3	0	2	0	2	1	1	6
6.00	mir-378c	Homo sapiens	0	2	0	2	0	0	0	0	3	4	6
6.00	mir-19b-2	Homo sapiens	0	0	0	0	0	6	0	0	0	0	6
6.00	mir-103a-1	Homo sapiens	0	0	0	0	0	0	0	0	4	6	6
6.00	mir-500a	Homo sapiens	0	0	0	0	2	6	2	3	0	0	6
6.00	mir-514a-2	Homo sapiens	0	0	0	0	5	6	0	0	0	0	6
6.00	mir-548o	Homo sapiens	0	0	0	0	6	6	0	0	0	0	6
6.00	mir-7110	Homo sapiens	0	0	0	0	0	0	0	0	0	6	6
5.00	mir-17	Homo sapiens	0	5	0	5	0	0	0	0	0	0	5
5.00	mir-3158-1	Homo sapiens	0	5	0	0	0	0	0	0	0	0	5
5.00	mir-9985	Homo sapiens	0	5	0	5	0	0	0	0	0	0	5
5.00	mir-215	Homo sapiens	0	4	0	3	0	0	0	0	0	1	5
5.00	mir-18a	Homo sapiens	0	0	0	0	0	3	0	3	2	2	5
5.00	mir-107	Homo sapiens	0	0	0	0	0	1	0	1	3	4	5
5.00	mir-514a-3	Homo sapiens	0	0	0	0	5	5	0	0	0	0	5
5.00	mir-1248	Homo sapiens	0	0	0	0	0	0	0	0	5	5	5
5.00	mir-3195	Homo sapiens	0	0	0	0	0	0	0	0	0	5	5
5.00	mir-4326	Homo sapiens	0	0	0	0	0	0	0	0	4	5	5
5.00	mir-4452	Homo sapiens	0	0	0	0	0	0	0	0	0	5	5
4.00	mir-659	Homo sapiens	4	4	4	4	0	0	0	0	0	0	4
4.00	mir-3616	Homo sapiens	0	4	0	4	0	0	0	0	0	0	4
4.00	mir-548ad	Homo sapiens	0	4	0	3	0	0	0	0	0	0	4
4.00	mir-4467	Homo sapiens	0	4	0	4	0	0	0	0	0	0	4
4.00	mir-4661	Homo sapiens	0	4	0	4	0	0	0	0	0	0	4
4.00	mir-5787	Homo sapiens	0	4	0	4	0	0	0	0	0	0	4
4.00	mir-10527	Homo sapiens	0	4	0	4	0	0	0	0	0	0	4
4.00	mir-3614	Homo sapiens	0	3	0	3	0	0	0	0	1	1	4
4.00	mir-3605	Homo sapiens	0	2	0	2	0	0	0	0	2	2	4
4.00	mir-4772	Homo sapiens	2	2	2	2	2	2	2	2	0	0	4
4.00	mir-2115	Homo sapiens	0	1	0	1	1	3	1	3	0	0	4
4.00	mir-548q	Homo sapiens	0	1	0	1	0	0	0	0	2	3	4
4.00	mir-93	Homo sapiens	0	0	0	0	0	1	0	1	2	3	4
4.00	mir-203a	Homo sapiens	0	0	0	0	0	3	0	3	0	1	4
4.00	mir-193b	Homo sapiens	0	0	0	0	3	4	3	4	0	0	4
4.00	mir-581	Homo sapiens	0	0	0	0	0	0	0	0	0	4	4
4.00	mir-421	Homo sapiens	0	0	0	0	0	4	0	4	0	0	4
4.00	mir-873	Homo sapiens	0	0	0	0	0	0	0	0	4	4	4
4.00	mir-1295a	Homo sapiens	0	0	0	0	4	4	4	4	0	0	4
4.00	mir-1268b	Homo sapiens	0	0	0	0	0	0	0	0	0	4	4
4.00	mir-5585	Homo sapiens	0	0	0	0	0	1	0	1	0	3	4
4.00	mir-6868	Homo sapiens	0	0	0	0	0	4	0	4	0	0	4
3.00	mir-195	Homo sapiens	2	3	2	3	0	0	0	0	0	0	3
3.00	mir-592	Homo sapiens	0	3	0	3	0	0	0	0	0	0	3
3.00	mir-450b	Homo sapiens	3	3	3	3	0	0	0	0	0	0	3
3.00	mir-548f-1	Homo sapiens	0	3	0	3	0	0	0	0	0	0	3
3.00	mir-3158-2	Homo sapiens	0	3	0	0	0	0	0	0	0	0	3
3.00	mir-4639	Homo sapiens	2	3	2	3	0	0	0	0	0	0	3
3.00	mir-6805	Homo sapiens	1	3	1	3	0	0	0	0	0	0	3
3.00	mir-6866	Homo sapiens	1	3	1	3	0	0	0	0	0	0	3
3.00	mir-365a	Homo sapiens	0	2	0	2	0	0	0	0	0	1	3
3.00	mir-676	Homo sapiens	0	1	0	1	0	2	0	2	0	0	3
3.00	mir-103a-2	Homo sapiens	0	0	0	0	0	0	0	0	3	3	3
3.00	mir-106a	Homo sapiens	0	0	0	0	0	0	0	0	3	3	3
3.00	mir-187	Homo sapiens	0	0	0	0	0	2	0	2	1	1	3
3.00	mir-1-2	Homo sapiens	0	0	0	0	0	2	0	0	1	1	3
3.00	mir-542	Homo sapiens	0	0	0	0	1	3	1	3	0	0	3
3.00	mir-1304	Homo sapiens	0	0	0	0	0	0	0	0	1	3	3
3.00	mir-3125	Homo sapiens	0	0	0	0	0	0	0	0	0	3	3
3.00	mir-3177	Homo sapiens	0	0	0	0	2	3	2	3	0	0	3
3.00	mir-378f	Homo sapiens	0	0	0	0	0	2	0	2	0	1	3
3.00	mir-4496	Homo sapiens	0	0	0	0	0	3	0	3	0	0	3
3.00	mir-4658	Homo sapiens	0	0	0	0	0	3	0	3	0	0	3
3.00	mir-4787	Homo sapiens	0	0	0	0	0	0	0	0	1	3	3
3.00	mir-6843	Homo sapiens	0	0	0	0	0	3	0	3	0	0	3
2.00	mir-212	Homo sapiens	2	2	2	2	0	0	0	0	0	0	2
2.00	mir-196b	Homo sapiens	0	2	0	1	0	0	0	0	0	0	2
2.00	mir-584	Homo sapiens	0	2	0	2	0	0	0	0	0	0	2
2.00	mir-1468	Homo sapiens	1	2	1	2	0	0	0	0	0	0	2
2.00	mir-548k	Homo sapiens	2	2	2	2	0	0	0	0	0	0	2
2.00	mir-1255a	Homo sapiens	0	2	0	2	0	0	0	0	0	0	2
2.00	mir-3150a	Homo sapiens	0	2	0	2	0	0	0	0	0	0	2
2.00	mir-3675	Homo sapiens	2	2	2	2	0	0	0	0	0	0	2
2.00	mir-4511	Homo sapiens	0	2	0	2	0	0	0	0	0	0	2
2.00	mir-4746	Homo sapiens	1	2	1	2	0	0	0	0	0	0	2
2.00	mir-4775	Homo sapiens	1	2	1	2	0	0	0	0	0	0	2
2.00	mir-4797	Homo sapiens	0	2	0	2	0	0	0	0	0	0	2
2.00	mir-548ap	Homo sapiens	0	2	0	2	0	0	0	0	0	0	2
2.00	mir-1295b	Homo sapiens	0	2	0	2	0	0	0	0	0	0	2
2.00	mir-6515	Homo sapiens	2	2	2	2	0	0	0	0	0	0	2
2.00	mir-6777	Homo sapiens	0	2	0	2	0	0	0	0	0	0	2
2.00	mir-548g	Homo sapiens	0	1	0	0	0	0	0	0	0	1	2
2.00	mir-219a-1	Homo sapiens	0	0	0	0	0	1	0	1	1	1	2
2.00	mir-145	Homo sapiens	0	0	0	0	0	2	0	2	0	0	2
2.00	mir-409	Homo sapiens	0	0	0	0	2	2	2	2	0	0	2
2.00	mir-590	Homo sapiens	0	0	0	0	2	2	2	2	0	0	2
2.00	mir-548d-2	Homo sapiens	0	0	0	0	0	0	0	0	0	2	2
2.00	mir-549a	Homo sapiens	0	0	0	0	2	2	2	2	0	0	2
2.00	mir-454	Homo sapiens	0	0	0	0	1	2	1	2	0	0	2
2.00	mir-887	Homo sapiens	0	0	0	0	0	0	0	0	2	2	2
2.00	mir-944	Homo sapiens	0	0	0	0	0	2	0	2	0	0	2
2.00	mir-1226	Homo sapiens	0	0	0	0	2	2	2	2	0	0	2
2.00	mir-663b	Homo sapiens	0	0	0	0	0	0	0	0	0	2	2
2.00	mir-548e	Homo sapiens	0	0	0	0	0	2	0	2	0	0	2
2.00	mir-1299	Homo sapiens	0	0	0	0	0	2	0	2	0	0	2
2.00	mir-548f-3	Homo sapiens	0	0	0	0	0	2	0	0	0	0	2
2.00	mir-320d-1	Homo sapiens	0	0	0	0	0	2	0	0	0	0	2
2.00	mir-1972-1	Homo sapiens	0	0	0	0	0	0	0	0	0	2	2
2.00	mir-3134	Homo sapiens	0	0	0	0	0	0	0	0	0	2	2
2.00	mir-3149	Homo sapiens	0	0	0	0	0	2	0	2	0	0	2
2.00	mir-1972-2	Homo sapiens	0	0	0	0	0	0	0	0	0	2	2
2.00	mir-3908	Homo sapiens	0	0	0	0	0	0	0	0	0	2	2
2.00	mir-3909	Homo sapiens	0	0	0	0	0	2	0	2	0	0	2
2.00	mir-3927	Homo sapiens	0	0	0	0	1	2	1	2	0	0	2
2.00	mir-4425	Homo sapiens	0	0	0	0	2	2	2	2	0	0	2
2.00	mir-4512	Homo sapiens	0	0	0	0	0	0	0	0	0	2	2
2.00	mir-4664	Homo sapiens	0	0	0	0	0	2	0	2	0	0	2
2.00	mir-5090	Homo sapiens	0	0	0	0	0	0	0	0	0	2	2
2.00	mir-5100	Homo sapiens	0	0	0	0	0	2	0	2	0	0	2
2.00	mir-5695	Homo sapiens	0	0	0	0	0	2	0	2	0	0	2
2.00	mir-5708	Homo sapiens	0	0	0	0	0	0	0	0	0	2	2
2.00	mir-6127	Homo sapiens	0	0	0	0	0	0	0	0	0	2	2
2.00	mir-6503	Homo sapiens	0	0	0	0	0	2	0	2	0	0	2
2.00	mir-6505	Homo sapiens	0	0	0	0	0	2	0	2	0	0	2
2.00	mir-6793	Homo sapiens	0	0	0	0	0	0	0	0	0	2	2
2.00	mir-7108	Homo sapiens	0	0	0	0	0	0	0	0	0	2	2
2.00	mir-7705	Homo sapiens	0	0	0	0	0	0	0	0	2	2	2
2.00	mir-6516	Homo sapiens	0	0	0	0	2	2	2	2	0	0	2
1.00	mir-15a	Homo sapiens	0	1	0	1	0	0	0	0	0	0	1
1.00	mir-196a-1	Homo sapiens	0	1	0	0	0	0	0	0	0	0	1
1.00	mir-139	Homo sapiens	1	1	1	1	0	0	0	0	0	0	1
1.00	mir-135a-1	Homo sapiens	1	1	0	0	0	0	0	0	0	0	1
1.00	mir-616	Homo sapiens	0	1	0	1	0	0	0	0	0	0	1
1.00	mir-548d-1	Homo sapiens	0	1	0	0	0	0	0	0	0	0	1
1.00	mir-550a-3	Homo sapiens	0	1	0	1	0	0	0	0	0	0	1
1.00	mir-1271	Homo sapiens	0	1	0	1	0	0	0	0	0	0	1
1.00	mir-1291	Homo sapiens	0	1	0	1	0	0	0	0	0	0	1
1.00	mir-1260a	Homo sapiens	0	1	0	1	0	0	0	0	0	0	1
1.00	mir-1262	Homo sapiens	0	1	0	1	0	0	0	0	0	0	1
1.00	mir-1266	Homo sapiens	1	1	1	1	0	0	0	0	0	0	1
1.00	mir-548i-1	Homo sapiens	0	1	0	0	0	0	0	0	0	0	1
1.00	mir-548i-2	Homo sapiens	0	1	0	0	0	0	0	0	0	0	1
1.00	mir-548i-3	Homo sapiens	0	1	0	0	0	0	0	0	0	0	1
1.00	mir-548i-4	Homo sapiens	0	1	0	0	0	0	0	0	0	0	1
1.00	mir-664a	Homo sapiens	0	1	0	1	0	0	0	0	0	0	1
1.00	mir-1260b	Homo sapiens	0	1	0	1	0	0	0	0	0	0	1
1.00	mir-3191	Homo sapiens	0	1	0	1	0	0	0	0	0	0	1
1.00	mir-3661	Homo sapiens	1	1	1	1	0	0	0	0	0	0	1
1.00	mir-3664	Homo sapiens	0	1	0	1	0	0	0	0	0	0	1
1.00	mir-3180-4	Homo sapiens	0	1	0	0	0	0	0	0	0	0	1
1.00	mir-378g	Homo sapiens	0	1	0	1	0	0	0	0	0	0	1
1.00	mir-548ae-2	Homo sapiens	1	1	0	0	0	0	0	0	0	0	1
1.00	mir-4638	Homo sapiens	1	1	1	1	0	0	0	0	0	0	1
1.00	mir-4667	Homo sapiens	0	1	0	1	0	0	0	0	0	0	1
1.00	mir-4668	Homo sapiens	0	1	0	1	0	0	0	0	0	0	1
1.00	mir-4677	Homo sapiens	0	1	0	1	0	0	0	0	0	0	1
1.00	mir-4700	Homo sapiens	0	1	0	1	0	0	0	0	0	0	1
1.00	mir-4520-2	Homo sapiens	0	1	0	0	0	0	0	0	0	0	1
1.00	mir-371b	Homo sapiens	1	1	1	1	0	0	0	0	0	0	1
1.00	mir-4804	Homo sapiens	0	1	0	1	0	0	0	0	0	0	1
1.00	mir-5701-1	Homo sapiens	0	1	0	0	0	0	0	0	0	0	1
1.00	mir-6511b-1	Homo sapiens	0	1	0	0	0	0	0	0	0	0	1
1.00	mir-6813	Homo sapiens	0	1	0	1	0	0	0	0	0	0	1
1.00	mir-6877	Homo sapiens	0	1	0	1	0	0	0	0	0	0	1
1.00	mir-3690-2	Homo sapiens	1	1	0	0	0	0	0	0	0	0	1
1.00	mir-7850	Homo sapiens	1	1	1	1	0	0	0	0	0	0	1
1.00	mir-1-1	Homo sapiens	0	0	0	0	0	1	0	0	0	0	1
1.00	mir-362	Homo sapiens	0	0	0	0	0	0	0	0	1	1	1
1.00	mir-381	Homo sapiens	0	0	0	0	1	1	1	1	0	0	1
1.00	mir-326	Homo sapiens	0	0	0	0	0	1	0	1	0	0	1
1.00	mir-548a-2	Homo sapiens	0	0	0	0	0	0	0	0	1	1	1
1.00	mir-609	Homo sapiens	0	0	0	0	0	0	0	0	1	1	1
1.00	mir-1181	Homo sapiens	0	0	0	0	0	0	0	0	0	1	1
1.00	mir-1293	Homo sapiens	0	0	0	0	0	0	0	0	1	1	1
1.00	mir-548f-2	Homo sapiens	0	0	0	0	0	1	0	0	0	0	1
1.00	mir-320d-2	Homo sapiens	0	0	0	0	0	1	0	0	0	0	1
1.00	mir-1976	Homo sapiens	0	0	0	0	0	1	0	1	0	0	1
1.00	mir-3118-3	Homo sapiens	0	0	0	0	0	0	0	0	0	1	1
1.00	mir-3129	Homo sapiens	0	0	0	0	0	1	0	1	0	0	1
1.00	mir-548u	Homo sapiens	0	0	0	0	0	1	0	1	0	0	1
1.00	mir-3180-3	Homo sapiens	0	0	0	0	0	0	0	0	1	1	1
1.00	mir-3682	Homo sapiens	0	0	0	0	1	1	1	1	0	0	1
1.00	mir-3922	Homo sapiens	0	0	0	0	0	0	0	0	1	1	1
1.00	mir-548aa-2	Homo sapiens	0	0	0	0	0	0	0	0	0	1	1
1.00	mir-4440	Homo sapiens	0	0	0	0	0	1	0	1	0	0	1
1.00	mir-4449	Homo sapiens	0	0	0	0	0	0	0	0	1	1	1
1.00	mir-548ah	Homo sapiens	0	0	0	0	1	1	1	1	0	0	1
1.00	mir-4477a	Homo sapiens	0	0	0	0	0	0	0	0	0	1	1
1.00	mir-4477b	Homo sapiens	0	0	0	0	0	0	0	0	1	1	1
1.00	mir-4510	Homo sapiens	0	0	0	0	0	0	0	0	0	1	1
1.00	mir-4529	Homo sapiens	0	0	0	0	0	0	0	0	1	1	1
1.00	mir-5689	Homo sapiens	0	0	0	0	0	0	0	0	0	1	1
1.00	mir-6131	Homo sapiens	0	0	0	0	0	1	0	1	0	0	1
1.00	mir-6750	Homo sapiens	0	0	0	0	0	0	0	0	0	1	1
1.00	mir-6762	Homo sapiens	0	0	0	0	0	0	0	0	1	1	1
1.00	mir-6818	Homo sapiens	0	0	0	0	0	0	0	0	0	1	1
1.00	mir-6873	Homo sapiens	0	0	0	0	0	1	0	1	0	0	1
1.00	mir-6511a-4	Homo sapiens	0	0	0	0	1	1	0	0	0	0	1
1.00	mir-7854	Homo sapiens	0	0	0	0	0	0	0	0	1	1	1
1.00	mir-8485	Homo sapiens	0	0	0	0	0	0	0	0	0	1	1
1.00	mir-9903	Homo sapiens	0	0	0	0	0	1	0	1	0	0	1
1.00	mir-10398	Homo sapiens	0	0	0	0	0	1	0	1	0	0	1
1.00	mir-12136	Homo sapiens	0	0	0	0	0	0	0	0	1	1	1
0.00	mir-135a-2	Homo sapiens	0	0	0	0	0	0	0	0	0	0	0
0.00	mir-548a-1	Homo sapiens	0	0	0	0	0	0	0	0	0	0	0
0.00	mir-548a-3	Homo sapiens	0	0	0	0	0	0	0	0	0	0	0
0.00	mir-3118-1	Homo sapiens	0	0	0	0	0	0	0	0	0	0	0
0.00	mir-3118-2	Homo sapiens	0	0	0	0	0	0	0	0	0	0	0
0.00	mir-3118-4	Homo sapiens	0	0	0	0	0	0	0	0	0	0	0
0.00	mir-3180-1	Homo sapiens	0	0	0	0	0	0	0	0	0	0	0
0.00	mir-3180-2	Homo sapiens	0	0	0	0	0	0	0	0	0	0	0
0.00	mir-548x	Homo sapiens	0	0	0	0	0	0	0	0	0	0	0
0.00	mir-3690-1	Homo sapiens	0	0	0	0	0	0	0	0	0	0	0
0.00	mir-3180-5	Homo sapiens	0	0	0	0	0	0	0	0	0	0	0
0.00	mir-548aj-2	Homo sapiens	0	0	0	0	0	0	0	0	0	0	0
0.00	mir-4520-1	Homo sapiens	0	0	0	0	0	0	0	0	0	0	0
0.00	mir-5701-2	Homo sapiens	0	0	0	0	0	0	0	0	0	0	0
0.00	mir-6125	Homo sapiens	0	0	0	0	0	0	0	0	0	0	0
0.00	mir-6511a-1	Homo sapiens	0	0	0	0	0	0	0	0	0	0	0
0.00	mir-6511b-2	Homo sapiens	0	0	0	0	0	0	0	0	0	0	0
0.00	mir-6511a-2	Homo sapiens	0	0	0	0	0	0	0	0	0	0	0
0.00	mir-6511a-3	Homo sapiens	0	0	0	0	0	0	0	0	0	0	0
0.00	mir-5701-3	Homo sapiens	0	0	0	0	0	0	0	0	0	0	0
0.00	mir-9902-1	Homo sapiens	0	0	0	0	0	0	0	0	0	0	0
0.00	mir-9902-2	Homo sapiens	0	0	0	0	0	0	0	0	0	0	0

## Sheet: F5
Expression values	Name	Resource	Exact mature 5'	Mature 5'	Unique exact mature 5'	Unique mature 5'	Exact mature 3'	Mature 3'	Unique exact mature 3'	Unique mature 3'	Exact other	Other	Total
17,725.00	mir-21	Homo sapiens	4987	17286	4987	17286	0	0	0	0	393	439	17725
16,788.00	mir-99a	Homo sapiens	44	16728	44	16704	0	0	0	0	55	60	16788
14,346.00	let-7b	Homo sapiens	4536	12819	4536	12805	0	12	0	12	1387	1515	14346
13,536.00	mir-34c	Homo sapiens	2551	10919	2551	10918	65	116	65	116	2376	2501	13536
7,995.00	let-7i	Homo sapiens	5861	7783	5861	7777	0	0	0	0	189	212	7995
9,471.00	mir-423	Homo sapiens	4092	7641	4092	7641	620	1235	620	1235	514	595	9471
4,909.00	mir-30d	Homo sapiens	694	4736	694	4733	0	4	0	3	145	169	4909
2,703.00	mir-3074	Homo sapiens	0	2676	0	2676	0	27	0	27	0	0	2703
2,615.00	let-7c	Homo sapiens	1660	2492	1660	2472	2	2	2	2	101	121	2615
1,837.00	let-7g	Homo sapiens	418	1798	418	1791	0	0	0	0	38	39	1837
1,733.00	mir-203b	Homo sapiens	2	1731	2	1731	0	1	0	1	0	1	1733
1,260.00	let-7f-2	Homo sapiens	334	1246	0	234	0	0	0	0	14	14	1260
21,377.00	mir-200a	Homo sapiens	537	1214	537	1214	3	20054	3	20036	101	109	21377
1,154.00	let-7a-1	Homo sapiens	280	1065	0	12	2	22	0	0	41	67	1154
1,145.00	let-7a-3	Homo sapiens	281	1047	0	1	3	24	0	0	49	74	1145
1,099.00	let-7a-2	Homo sapiens	280	1037	0	0	0	0	0	0	41	62	1099
1,046.00	let-7f-1	Homo sapiens	334	1018	0	1	0	10	0	10	17	18	1046
1,033.00	mir-100	Homo sapiens	4	1012	4	993	0	0	0	0	21	21	1033
919.00	mir-146a	Homo sapiens	244	918	244	910	0	0	0	0	1	1	919
893.00	mir-26a-2	Homo sapiens	676	883	0	0	0	0	0	0	10	10	893
890.00	mir-26a-1	Homo sapiens	675	878	0	0	0	0	0	0	11	12	890
1,153.00	mir-30a	Homo sapiens	193	856	193	855	46	205	46	197	75	92	1153
747.00	mir-146b	Homo sapiens	394	739	394	732	0	7	0	7	1	1	747
714.00	mir-183	Homo sapiens	305	711	305	711	0	0	0	0	0	3	714
718.00	mir-744	Homo sapiens	16	685	16	685	0	0	0	0	7	33	718
634.00	mir-449c	Homo sapiens	62	625	62	625	0	0	0	0	6	9	634
731.00	mir-99b	Homo sapiens	46	613	46	612	73	105	73	105	12	13	731
606.00	mir-532	Homo sapiens	501	606	501	606	0	0	0	0	0	0	606
547.00	mir-205	Homo sapiens	155	542	155	542	0	0	0	0	3	5	547
526.00	mir-190b	Homo sapiens	99	526	99	526	0	0	0	0	0	0	526
646.00	mir-2110	Homo sapiens	72	475	72	475	0	0	0	0	52	171	646
527.00	mir-181a-1	Homo sapiens	13	393	0	0	2	6	2	6	120	128	527
533.00	mir-181a-2	Homo sapiens	13	391	0	0	1	18	1	18	115	124	533
403.00	mir-342	Homo sapiens	132	371	132	371	0	6	0	6	14	26	403
2,582.00	mir-92b	Homo sapiens	0	358	0	358	623	2018	623	1981	161	206	2582
448.00	mir-224	Homo sapiens	0	356	0	356	0	0	0	0	82	92	448
408.00	mir-125a	Homo sapiens	0	321	0	321	0	29	0	29	40	58	408
259.00	mir-186	Homo sapiens	77	252	77	252	0	0	0	0	7	7	259
251.00	mir-449a	Homo sapiens	119	229	119	227	0	0	0	0	8	22	251
251.00	mir-192	Homo sapiens	42	206	42	206	0	0	0	0	30	45	251
6,777.00	mir-200b	Homo sapiens	40	191	40	191	479	6510	479	6499	19	76	6777
183.00	mir-191	Homo sapiens	73	166	73	166	0	0	0	0	17	17	183
753.00	mir-3184	Homo sapiens	0	162	0	162	0	0	0	0	512	591	753
157.00	mir-26b	Homo sapiens	70	157	70	157	0	0	0	0	0	0	157
213.00	mir-23b	Homo sapiens	31	153	31	153	0	41	0	41	17	19	213
408.00	mir-30e	Homo sapiens	19	140	19	137	69	131	69	123	129	137	408
138.00	mir-10a	Homo sapiens	0	132	0	132	0	0	0	0	5	6	138
178.00	let-7d	Homo sapiens	0	130	0	126	0	43	0	43	4	5	178
182.00	mir-182	Homo sapiens	35	129	35	129	0	3	0	3	48	50	182
213.00	mir-125b-1	Homo sapiens	11	124	0	0	3	36	3	36	50	53	213
210.00	mir-125b-2	Homo sapiens	11	121	0	0	4	30	4	30	51	59	210
143.00	mir-340	Homo sapiens	60	116	60	116	3	27	3	27	0	0	143
131.00	mir-1843	Homo sapiens	0	111	0	111	0	0	0	0	4	20	131
111.00	mir-1246	Homo sapiens	0	105	0	105	0	0	0	0	0	6	111
1,699.00	mir-22	Homo sapiens	1	101	1	101	430	1404	430	1404	185	194	1699
98.00	mir-769	Homo sapiens	64	98	64	98	0	0	0	0	0	0	98
97.00	let-7e	Homo sapiens	15	97	15	89	0	0	0	0	0	0	97
89.00	mir-451a	Homo sapiens	0	89	0	89	0	0	0	0	0	0	89
80.00	mir-499a	Homo sapiens	9	80	9	80	0	0	0	0	0	0	80
84.00	mir-149	Homo sapiens	6	69	6	69	0	1	0	1	13	14	84
64.00	mir-218-2	Homo sapiens	35	64	0	0	0	0	0	0	0	0	64
63.00	mir-218-1	Homo sapiens	35	63	0	0	0	0	0	0	0	0	63
60.00	mir-642b	Homo sapiens	29	60	29	60	0	0	0	0	0	0	60
59.00	mir-486-2	Homo sapiens	9	59	0	8	0	0	0	0	0	0	59
58.00	mir-10400	Homo sapiens	0	58	0	58	0	0	0	0	0	0	58
52.00	mir-629	Homo sapiens	35	52	35	52	0	0	0	0	0	0	52
79.00	mir-150	Homo sapiens	36	50	36	50	0	26	0	26	3	3	79
48.00	mir-345	Homo sapiens	18	48	18	48	0	0	0	0	0	0	48
48.00	mir-486-1	Homo sapiens	9	48	0	1	0	0	0	0	0	0	48
52.00	mir-155	Homo sapiens	0	46	0	46	0	0	0	0	6	6	52
45.00	mir-484	Homo sapiens	23	45	23	45	0	0	0	0	0	0	45
44.00	mir-378i	Homo sapiens	0	44	0	43	0	0	0	0	0	0	44
333.00	mir-28	Homo sapiens	8	43	8	43	102	277	102	277	0	13	333
44.00	mir-16-1	Homo sapiens	7	41	0	0	0	0	0	0	3	3	44
99.00	mir-16-2	Homo sapiens	7	40	0	0	2	51	2	51	7	8	99
45.00	mir-193b	Homo sapiens	3	37	3	37	3	8	3	8	0	0	45
36.00	mir-4488	Homo sapiens	0	36	0	36	0	0	0	0	0	0	36
37.00	mir-32	Homo sapiens	26	35	26	35	0	2	0	2	0	0	37
51.00	mir-98	Homo sapiens	22	35	22	33	0	0	0	0	7	16	51
35.00	mir-103b-1	Homo sapiens	20	35	0	0	0	0	0	0	0	0	35
35.00	mir-103b-2	Homo sapiens	20	35	0	0	0	0	0	0	0	0	35
34.00	mir-135b	Homo sapiens	33	34	33	34	0	0	0	0	0	0	34
46.00	mir-425	Homo sapiens	7	31	7	31	0	6	0	6	8	9	46
182,453.00	mir-148a	Homo sapiens	17	29	17	29	164223	182292	164223	182043	118	132	182453
39.00	mir-9-1	Homo sapiens	0	28	0	0	0	3	0	0	8	8	39
40.00	mir-9-3	Homo sapiens	0	28	0	0	0	4	0	0	8	8	40
68.00	mir-132	Homo sapiens	0	27	0	27	3	22	3	22	16	19	68
29.00	mir-7-3	Homo sapiens	18	26	0	0	0	0	0	0	3	3	29
28.00	mir-7-1	Homo sapiens	18	25	0	0	0	0	0	0	3	3	28
25.00	mir-3158-1	Homo sapiens	0	25	0	0	0	0	0	0	0	0	25
25.00	mir-3158-2	Homo sapiens	0	25	0	0	0	0	0	0	0	0	25
37.00	mir-9-2	Homo sapiens	0	24	0	0	0	5	0	0	8	8	37
27.00	mir-509-3	Homo sapiens	6	24	6	24	0	3	0	0	0	0	27
27.00	mir-7-2	Homo sapiens	19	23	0	0	0	0	0	0	4	4	27
187.00	mir-140	Homo sapiens	2	23	2	23	18	114	18	114	11	50	187
23.00	mir-7704	Homo sapiens	0	23	0	23	0	0	0	0	0	0	23
64.00	mir-181b-1	Homo sapiens	3	22	0	0	0	0	0	0	40	42	64
147.00	mir-221	Homo sapiens	0	22	0	22	25	106	25	106	18	19	147
22.00	mir-331	Homo sapiens	0	22	0	22	0	0	0	0	0	0	22
3,975.00	mir-27a	Homo sapiens	3	21	3	21	14	3954	14	3912	0	0	3975
64.00	mir-181b-2	Homo sapiens	3	21	0	0	0	0	0	0	41	43	64
374.00	mir-141	Homo sapiens	17	20	17	20	0	317	0	302	32	37	374
20.00	mir-455	Homo sapiens	5	20	5	20	0	0	0	0	0	0	20
20.00	mir-589	Homo sapiens	0	20	0	20	0	0	0	0	0	0	20
19.00	mir-185	Homo sapiens	1	19	1	19	0	0	0	0	0	0	19
13,084.00	mir-151a	Homo sapiens	16	19	16	19	9231	13002	9231	13002	11	63	13084
25.00	mir-625	Homo sapiens	0	18	0	18	0	7	0	7	0	0	25
431.00	mir-142	Homo sapiens	3	16	3	16	3	12	3	12	373	403	431
26.00	mir-449b	Homo sapiens	5	16	5	13	6	6	6	6	4	4	26
15.00	mir-96	Homo sapiens	9	15	9	15	0	0	0	0	0	0	15
15.00	mir-422a	Homo sapiens	0	15	0	15	0	0	0	0	0	0	15
15.00	mir-511	Homo sapiens	7	15	7	15	0	0	0	0	0	0	15
74.00	mir-24-2	Homo sapiens	0	14	0	14	0	44	0	0	16	16	74
15.00	mir-211	Homo sapiens	13	14	13	14	1	1	1	1	0	0	15
14.00	mir-194-1	Homo sapiens	0	14	0	0	0	0	0	0	0	0	14
20.00	mir-30c-1	Homo sapiens	8	14	0	0	1	1	1	1	5	5	20
14.00	mir-374b	Homo sapiens	4	14	4	13	0	0	0	0	0	0	14
27.00	mir-30c-2	Homo sapiens	7	12	0	0	0	10	0	10	5	5	27
12.00	mir-4661	Homo sapiens	0	12	0	12	0	0	0	0	0	0	12
12.00	mir-9985	Homo sapiens	0	12	0	12	0	0	0	0	0	0	12
11.00	mir-194-2	Homo sapiens	0	11	0	0	0	0	0	0	0	0	11
46.00	mir-330	Homo sapiens	0	11	0	11	0	34	0	34	0	1	46
27.00	mir-223	Homo sapiens	0	10	0	10	0	17	0	17	0	0	27
845.00	mir-34b	Homo sapiens	0	10	0	7	3	823	3	823	11	12	845
10.00	mir-1468	Homo sapiens	4	10	4	10	0	0	0	0	0	0	10
9.00	mir-129-2	Homo sapiens	6	9	0	0	0	0	0	0	0	0	9
427.00	mir-1307	Homo sapiens	6	9	6	9	0	412	0	412	0	6	427
8.00	mir-10b	Homo sapiens	0	8	0	8	0	0	0	0	0	0	8
8.00	mir-199b	Homo sapiens	1	8	1	8	0	0	0	0	0	0	8
8.00	mir-651	Homo sapiens	2	8	2	8	0	0	0	0	0	0	8
23.00	mir-877	Homo sapiens	8	8	8	8	0	0	0	0	0	15	23
7.00	mir-129-1	Homo sapiens	6	7	0	0	0	0	0	0	0	0	7
7.00	mir-204	Homo sapiens	5	7	5	7	0	0	0	0	0	0	7
7.00	mir-193a	Homo sapiens	5	7	5	7	0	0	0	0	0	0	7
7.00	mir-1287	Homo sapiens	1	7	1	7	0	0	0	0	0	0	7
7.00	mir-3150a	Homo sapiens	0	7	0	7	0	0	0	0	0	0	7
6.00	mir-20a	Homo sapiens	6	6	6	6	0	0	0	0	0	0	6
6.00	mir-181c	Homo sapiens	0	6	0	6	0	0	0	0	0	0	6
11.00	mir-1293	Homo sapiens	0	6	0	6	0	0	0	0	0	5	11
6.00	mir-3065	Homo sapiens	6	6	6	6	0	0	0	0	0	0	6
6.00	mir-3664	Homo sapiens	0	6	0	6	0	0	0	0	0	0	6
6.00	mir-4689	Homo sapiens	0	6	0	6	0	0	0	0	0	0	6
6.00	mir-3064	Homo sapiens	0	6	0	6	0	0	0	0	0	0	6
6.00	mir-4746	Homo sapiens	0	6	0	6	0	0	0	0	0	0	6
6.00	mir-1295b	Homo sapiens	0	6	0	6	0	0	0	0	0	0	6
531.00	mir-361	Homo sapiens	0	5	0	5	47	481	47	481	44	45	531
5.00	mir-196b	Homo sapiens	5	5	5	5	0	0	0	0	0	0	5
5.00	mir-584	Homo sapiens	0	5	0	5	0	0	0	0	0	0	5
17.00	mir-619	Homo sapiens	0	5	0	5	0	0	0	0	0	12	17
5.00	mir-659	Homo sapiens	4	5	4	5	0	0	0	0	0	0	5
5.00	mir-660	Homo sapiens	0	5	0	5	0	0	0	0	0	0	5
5.00	mir-942	Homo sapiens	0	5	0	5	0	0	0	0	0	0	5
5.00	mir-1292	Homo sapiens	5	5	5	5	0	0	0	0	0	0	5
5.00	mir-4467	Homo sapiens	0	5	0	5	0	0	0	0	0	0	5
5.00	mir-4489	Homo sapiens	3	5	3	5	0	0	0	0	0	0	5
5.00	mir-5009	Homo sapiens	0	5	0	5	0	0	0	0	0	0	5
5.00	mir-6866	Homo sapiens	0	5	0	5	0	0	0	0	0	0	5
88.00	mir-363	Homo sapiens	1	4	1	4	48	84	48	84	0	0	88
11.00	mir-628	Homo sapiens	0	4	0	4	2	7	2	7	0	0	11
4.00	mir-3913-1	Homo sapiens	0	4	0	0	0	0	0	0	0	0	4
4.00	mir-3913-2	Homo sapiens	0	4	0	0	0	0	0	0	0	0	4
4.00	mir-6887	Homo sapiens	0	4	0	4	0	0	0	0	0	0	4
702.00	mir-25	Homo sapiens	3	3	3	3	359	699	359	699	0	0	702
3.00	mir-130b	Homo sapiens	0	3	0	3	0	0	0	0	0	0	3
3.00	mir-338	Homo sapiens	0	3	0	3	0	0	0	0	0	0	3
20.00	mir-181d	Homo sapiens	2	3	2	3	0	0	0	0	16	17	20
3.00	mir-450a-2	Homo sapiens	2	3	0	0	0	0	0	0	0	0	3
3.00	mir-1271	Homo sapiens	0	3	0	3	0	0	0	0	0	0	3
3.00	mir-548f-1	Homo sapiens	0	3	0	3	0	0	0	0	0	0	3
3.00	mir-548i-2	Homo sapiens	0	3	0	0	0	0	0	0	0	0	3
3.00	mir-548i-4	Homo sapiens	0	3	0	0	0	0	0	0	0	0	3
3.00	mir-378g	Homo sapiens	0	3	0	3	0	0	0	0	0	0	3
8.00	mir-4677	Homo sapiens	0	3	0	3	0	5	0	5	0	0	8
3.00	mir-6727	Homo sapiens	0	3	0	3	0	0	0	0	0	0	3
3.00	mir-6773	Homo sapiens	3	3	3	3	0	0	0	0	0	0	3
3.00	mir-6799	Homo sapiens	0	3	0	3	0	0	0	0	0	0	3
6.00	mir-195	Homo sapiens	2	2	2	2	0	4	0	4	0	0	6
2.00	mir-450a-1	Homo sapiens	2	2	0	0	0	0	0	0	0	0	2
23.00	mir-501	Homo sapiens	0	2	0	2	0	21	0	21	0	0	23
2.00	mir-548i-1	Homo sapiens	0	2	0	0	0	0	0	0	0	0	2
2.00	mir-548i-3	Homo sapiens	0	2	0	0	0	0	0	0	0	0	2
3.00	mir-378c	Homo sapiens	0	2	0	2	0	0	0	0	1	1	3
2.00	mir-3616	Homo sapiens	0	2	0	2	0	0	0	0	0	0	2
2.00	mir-4639	Homo sapiens	0	2	0	2	0	0	0	0	0	0	2
2.00	mir-4652	Homo sapiens	0	2	0	2	0	0	0	0	0	0	2
2.00	mir-4654	Homo sapiens	0	2	0	2	0	0	0	0	0	0	2
2.00	mir-4679-1	Homo sapiens	0	2	0	0	0	0	0	0	0	0	2
2.00	mir-6515	Homo sapiens	0	2	0	2	0	0	0	0	0	0	2
2.00	mir-6735	Homo sapiens	0	2	0	2	0	0	0	0	0	0	2
2.00	mir-6736	Homo sapiens	0	2	0	2	0	0	0	0	0	0	2
2.00	mir-6787	Homo sapiens	2	2	2	2	0	0	0	0	0	0	2
1.00	mir-17	Homo sapiens	0	1	0	1	0	0	0	0	0	0	1
1.00	mir-217	Homo sapiens	0	1	0	1	0	0	0	0	0	0	1
1.00	mir-15b	Homo sapiens	0	1	0	1	0	0	0	0	0	0	1
10.00	mir-30b	Homo sapiens	0	1	0	1	0	9	0	9	0	0	10
2.00	mir-374a	Homo sapiens	1	1	1	1	0	1	0	1	0	0	2
1.00	mir-378d-2	Homo sapiens	0	1	0	1	0	0	0	0	0	0	1
1.00	mir-1266	Homo sapiens	0	1	0	1	0	0	0	0	0	0	1
1.00	mir-664a	Homo sapiens	0	1	0	1	0	0	0	0	0	0	1
1.00	mir-3186	Homo sapiens	1	1	1	1	0	0	0	0	0	0	1
1.00	mir-3679	Homo sapiens	0	1	0	1	0	0	0	0	0	0	1
1.00	mir-4510	Homo sapiens	0	1	0	0	0	0	0	0	0	0	1
1.00	mir-4679-2	Homo sapiens	0	1	0	0	0	0	0	0	0	0	1
1.00	mir-6793	Homo sapiens	0	1	0	1	0	0	0	0	0	0	1
1.00	mir-6877	Homo sapiens	0	1	0	1	0	0	0	0	0	0	1
1.00	mir-10396a	Homo sapiens	0	1	0	1	0	0	0	0	0	0	1
1.00	mir-10396b	Homo sapiens	0	1	0	1	0	0	0	0	0	0	1
1.00	mir-19a	Homo sapiens	0	0	0	0	0	1	0	1	0	0	1
1.00	mir-19b-1	Homo sapiens	0	0	0	0	0	1	0	0	0	0	1
2.00	mir-19b-2	Homo sapiens	0	0	0	0	0	2	0	0	0	0	2
13.00	mir-23a	Homo sapiens	0	0	0	0	0	13	0	13	0	0	13
45.00	mir-24-1	Homo sapiens	0	0	0	0	0	45	0	0	0	0	45
627.00	mir-29a	Homo sapiens	0	0	0	0	15	410	15	410	206	217	627
449.00	mir-92a-1	Homo sapiens	0	0	0	0	196	447	0	53	0	2	449
386.00	mir-92a-2	Homo sapiens	0	0	0	0	197	386	0	1	0	0	386
172.00	mir-95	Homo sapiens	0	0	0	0	5	172	5	172	0	0	172
310.00	mir-101-1	Homo sapiens	0	0	0	0	58	306	0	0	3	4	310
8.00	mir-29b-1	Homo sapiens	0	0	0	0	0	5	0	0	3	3	8
9.00	mir-29b-2	Homo sapiens	0	0	0	0	0	4	0	0	4	5	9
1.00	mir-107	Homo sapiens	0	0	0	0	0	1	0	1	0	0	1
18.00	mir-197	Homo sapiens	0	0	0	0	14	18	14	18	0	0	18
6.00	mir-34a	Homo sapiens	0	0	0	0	0	0	0	0	6	6	6
4.00	mir-187	Homo sapiens	0	0	0	0	0	4	0	4	0	0	4
1.00	mir-203a	Homo sapiens	0	0	0	0	0	0	0	0	0	1	1
29.00	mir-210	Homo sapiens	0	0	0	0	0	29	0	29	0	0	29
4.00	mir-212	Homo sapiens	0	0	0	0	0	0	0	0	4	4	4
745.00	mir-222	Homo sapiens	0	0	0	0	314	634	314	634	92	111	745
8,166.00	mir-27b	Homo sapiens	0	0	0	0	501	8159	501	8113	1	7	8166
652.00	mir-128-1	Homo sapiens	0	0	0	0	192	649	0	255	0	3	652
119.00	mir-143	Homo sapiens	0	0	0	0	99	119	99	119	0	0	119
120.00	mir-152	Homo sapiens	0	0	0	0	27	120	27	120	0	0	120
7.00	mir-126	Homo sapiens	0	0	0	0	3	7	3	7	0	0	7
5.00	mir-127	Homo sapiens	0	0	0	0	2	5	2	5	0	0	5
1.00	mir-138-1	Homo sapiens	0	0	0	0	0	1	0	1	0	0	1
154.00	mir-184	Homo sapiens	0	0	0	0	88	150	88	150	4	4	154
1,937.00	mir-320a	Homo sapiens	0	0	0	0	632	1896	632	1801	4	41	1937
3,447.00	mir-200c	Homo sapiens	0	0	0	0	661	3265	661	3253	171	182	3447
402.00	mir-128-2	Homo sapiens	0	0	0	0	193	402	0	5	0	0	402
219.00	mir-106b	Homo sapiens	0	0	0	0	59	150	59	150	66	69	219
18.00	mir-29c	Homo sapiens	0	0	0	0	0	8	0	8	10	10	18
318.00	mir-101-2	Homo sapiens	0	0	0	0	58	314	0	11	3	4	318
6.00	mir-296	Homo sapiens	0	0	0	0	0	4	0	4	2	2	6
9,151.00	mir-375	Homo sapiens	0	0	0	0	1946	8859	1946	8859	273	292	9151
1,463.00	mir-378a	Homo sapiens	0	0	0	0	3	1463	3	1463	0	0	1463
4.00	mir-381	Homo sapiens	0	0	0	0	4	4	4	4	0	0	4
88.00	mir-328	Homo sapiens	0	0	0	0	50	88	50	88	0	0	88
3.00	mir-326	Homo sapiens	0	0	0	0	3	3	3	3	0	0	3
698.00	mir-148b	Homo sapiens	0	0	0	0	249	698	249	445	0	0	698
8.00	mir-324	Homo sapiens	0	0	0	0	0	0	0	0	0	8	8
12.00	mir-339	Homo sapiens	0	0	0	0	1	12	1	12	0	0	12
26.00	mir-335	Homo sapiens	0	0	0	0	12	26	12	26	0	0	26
1,064.00	mir-429	Homo sapiens	0	0	0	0	438	1046	438	1046	17	18	1064
9.00	mir-452	Homo sapiens	0	0	0	0	0	0	0	0	8	9	9
2.00	mir-493	Homo sapiens	0	0	0	0	2	2	2	2	0	0	2
4.00	mir-500a	Homo sapiens	0	0	0	0	0	4	0	4	0	0	4
2.00	mir-502	Homo sapiens	0	0	0	0	0	2	0	2	0	0	2
15.00	mir-505	Homo sapiens	0	0	0	0	0	15	0	15	0	0	15
3.00	mir-506	Homo sapiens	0	0	0	0	0	3	0	3	0	0	3
3.00	mir-509-1	Homo sapiens	0	0	0	0	0	3	0	0	0	0	3
3.00	mir-514a-1	Homo sapiens	0	0	0	0	3	3	0	0	0	0	3
3.00	mir-514a-2	Homo sapiens	0	0	0	0	3	3	0	0	0	0	3
2.00	mir-514a-3	Homo sapiens	0	0	0	0	2	2	0	0	0	0	2
1.00	mir-544a	Homo sapiens	0	0	0	0	0	0	0	0	0	1	1
83.00	mir-574	Homo sapiens	0	0	0	0	34	71	34	71	2	12	83
4.00	mir-576	Homo sapiens	0	0	0	0	0	4	0	4	0	0	4
82.00	mir-582	Homo sapiens	0	0	0	0	76	82	76	82	0	0	82
0.00	mir-548a-1	Homo sapiens	0	0	0	0	0	0	0	0	0	0	0
1.00	mir-548a-2	Homo sapiens	0	0	0	0	0	1	0	0	0	0	1
1.00	mir-598	Homo sapiens	0	0	0	0	0	1	0	1	0	0	1
0.00	mir-548a-3	Homo sapiens	0	0	0	0	0	0	0	0	0	0	0
2.00	mir-622	Homo sapiens	0	0	0	0	0	0	0	0	2	2	2
6.00	mir-652	Homo sapiens	0	0	0	0	0	6	0	6	0	0	6
1.00	mir-662	Homo sapiens	0	0	0	0	0	0	0	0	1	1	1
10.00	mir-421	Homo sapiens	0	0	0	0	0	10	0	10	0	0	10
34.00	mir-671	Homo sapiens	0	0	0	0	5	34	5	34	0	0	34
96.00	mir-320b-1	Homo sapiens	0	0	0	0	0	95	0	0	0	1	96
14.00	mir-320c-1	Homo sapiens	0	0	0	0	1	14	0	0	0	0	14
31.00	mir-1301	Homo sapiens	0	0	0	0	6	21	6	21	4	10	31
91.00	mir-320b-2	Homo sapiens	0	0	0	0	0	91	0	0	0	0	91
8.00	mir-2113	Homo sapiens	0	0	0	0	0	8	0	8	0	0	8
3.00	mir-509-2	Homo sapiens	0	0	0	0	0	3	0	0	0	0	3
8.00	mir-874	Homo sapiens	0	0	0	0	0	8	0	8	0	0	8
168.00	mir-708	Homo sapiens	0	0	0	0	0	150	0	150	16	18	168
11.00	mir-147b	Homo sapiens	0	0	0	0	0	11	0	11	0	0	11
2.00	mir-543	Homo sapiens	0	0	0	0	2	2	2	2	0	0	2
96.00	mir-760	Homo sapiens	0	0	0	0	2	96	2	96	0	0	96
3.00	mir-933	Homo sapiens	0	0	0	0	0	0	0	0	3	3	3
2.00	mir-937	Homo sapiens	0	0	0	0	0	2	0	2	0	0	2
27.00	mir-941-1	Homo sapiens	0	0	0	0	21	26	0	0	1	1	27
26.00	mir-941-2	Homo sapiens	0	0	0	0	20	25	0	0	1	1	26
25.00	mir-941-3	Homo sapiens	0	0	0	0	20	25	0	0	0	0	25
23.00	mir-941-4	Homo sapiens	0	0	0	0	20	23	0	0	0	0	23
8.00	mir-944	Homo sapiens	0	0	0	0	0	8	0	8	0	0	8
1,333.00	mir-1180	Homo sapiens	0	0	0	0	815	1296	815	1296	34	37	1333
2.00	mir-1226	Homo sapiens	0	0	0	0	0	2	0	2	0	0	2
8.00	mir-548e	Homo sapiens	0	0	0	0	0	8	0	8	0	0	8
15.00	mir-1285-1	Homo sapiens	0	0	0	0	3	3	0	0	3	12	15
4.00	mir-1285-2	Homo sapiens	0	0	0	0	4	4	0	0	0	0	4
24.00	mir-1290	Homo sapiens	0	0	0	0	0	24	0	24	0	0	24
2.00	mir-1291	Homo sapiens	0	0	0	0	0	0	0	0	2	2	2
3.00	mir-1295a	Homo sapiens	0	0	0	0	1	3	1	3	0	0	3
2.00	mir-1299	Homo sapiens	0	0	0	0	0	2	0	2	0	0	2
3.00	mir-1303	Homo sapiens	0	0	0	0	0	2	0	2	0	1	3
14.00	mir-1304	Homo sapiens	0	0	0	0	0	14	0	14	0	0	14
3.00	mir-548f-2	Homo sapiens	0	0	0	0	0	3	0	0	0	0	3
2.00	mir-548f-3	Homo sapiens	0	0	0	0	0	2	0	0	0	0	2
2.00	mir-1248	Homo sapiens	0	0	0	0	0	0	0	0	2	2	2
3.00	mir-1260a	Homo sapiens	0	0	0	0	0	0	0	0	0	3	3
13.00	mir-548o	Homo sapiens	0	0	0	0	13	13	0	0	0	0	13
11.00	mir-1269a	Homo sapiens	0	0	0	0	0	11	0	11	0	0	11
3.00	mir-1278	Homo sapiens	0	0	0	0	0	3	0	3	0	0	3
4.00	mir-1288	Homo sapiens	0	0	0	0	4	4	4	4	0	0	4
9.00	mir-1306	Homo sapiens	0	0	0	0	0	3	0	3	2	6	9
5.00	mir-320d-1	Homo sapiens	0	0	0	0	1	5	0	4	0	0	5
14.00	mir-320c-2	Homo sapiens	0	0	0	0	1	14	0	0	0	0	14
2.00	mir-320d-2	Homo sapiens	0	0	0	0	1	2	0	1	0	0	2
4.00	mir-1976	Homo sapiens	0	0	0	0	0	4	0	4	0	0	4
2.00	mir-2276	Homo sapiens	0	0	0	0	2	2	2	2	0	0	2
5.00	mir-3127	Homo sapiens	0	0	0	0	0	5	0	5	0	0	5
3.00	mir-3135a	Homo sapiens	0	0	0	0	0	0	0	0	0	3	3
2.00	mir-1273c	Homo sapiens	0	0	0	0	0	0	0	0	0	2	2
14.00	mir-3159	Homo sapiens	0	0	0	0	0	0	0	0	4	14	14
33.00	mir-3177	Homo sapiens	0	0	0	0	13	33	13	33	0	0	33
1.00	mir-3180-1	Homo sapiens	0	0	0	0	1	1	0	0	0	0	1
2.00	mir-3180-2	Homo sapiens	0	0	0	0	1	2	0	0	0	0	2
1.00	mir-3180-3	Homo sapiens	0	0	0	0	1	1	0	0	0	0	1
6.00	mir-3196	Homo sapiens	0	0	0	0	0	0	0	0	0	6	6
0.00	mir-3198-1	Homo sapiens	0	0	0	0	0	0	0	0	0	0	0
247.00	mir-3615	Homo sapiens	0	0	0	0	0	246	0	246	1	1	247
2.00	mir-3648-1	Homo sapiens	0	0	0	0	0	0	0	0	2	2	2
5.00	mir-3665	Homo sapiens	0	0	0	0	0	0	0	0	0	5	5
2.00	mir-3690-1	Homo sapiens	0	0	0	0	0	0	0	0	2	2	2
9.00	mir-3909	Homo sapiens	0	0	0	0	2	3	2	3	6	6	9
4.00	mir-3929	Homo sapiens	0	0	0	0	0	0	0	0	0	4	4
1.00	mir-548y	Homo sapiens	0	0	0	0	0	0	0	0	1	1	1
15.00	mir-548o-2	Homo sapiens	0	0	0	0	13	15	0	0	0	0	15
7.00	mir-378f	Homo sapiens	0	0	0	0	0	0	0	0	0	7	7
5.00	mir-4422	Homo sapiens	0	0	0	0	0	0	0	0	4	5	5
9.00	mir-4430	Homo sapiens	0	0	0	0	0	0	0	0	0	9	9
135.00	mir-4446	Homo sapiens	0	0	0	0	45	123	45	123	11	12	135
10.00	mir-4448	Homo sapiens	0	0	0	0	0	10	0	10	0	0	10
2.00	mir-548ah	Homo sapiens	0	0	0	0	0	2	0	2	0	0	2
9.00	mir-3135b	Homo sapiens	0	0	0	0	0	0	0	0	0	9	9
69.00	mir-4485	Homo sapiens	0	0	0	0	0	49	0	49	9	20	69
252.00	mir-3960	Homo sapiens	0	0	0	0	0	16	0	16	0	236	252
3.00	mir-4638	Homo sapiens	0	0	0	0	0	3	0	3	0	0	3
3.00	mir-4658	Homo sapiens	0	0	0	0	0	1	0	1	2	2	3
22.00	mir-4664	Homo sapiens	0	0	0	0	3	22	3	22	0	0	22
6.00	mir-4687	Homo sapiens	0	0	0	0	0	6	0	6	0	0	6
1.00	mir-4701	Homo sapiens	0	0	0	0	0	1	0	1	0	0	1
1.00	mir-3198-2	Homo sapiens	0	0	0	0	0	0	0	0	1	1	1
5.00	mir-4707	Homo sapiens	0	0	0	0	0	5	0	5	0	0	5
3.00	mir-3529	Homo sapiens	0	0	0	0	0	0	0	0	3	3	3
1.00	mir-4436b-1	Homo sapiens	0	0	0	0	0	1	0	0	0	0	1
2.00	mir-5001	Homo sapiens	0	0	0	0	0	0	0	0	1	2	2
0.00	mir-4436b-2	Homo sapiens	0	0	0	0	0	0	0	0	0	0	0
1.00	mir-5571	Homo sapiens	0	0	0	0	0	0	0	0	1	1	1
7.00	mir-548ar	Homo sapiens	0	0	0	0	7	7	7	7	0	0	7
5.00	mir-5585	Homo sapiens	0	0	0	0	0	5	0	5	0	0	5
4.00	mir-5684	Homo sapiens	0	0	0	0	0	0	0	0	0	4	4
5.00	mir-6503	Homo sapiens	0	0	0	0	0	5	0	5	0	0	5
68.00	mir-6510	Homo sapiens	0	0	0	0	28	68	28	68	0	0	68
2.00	mir-6511a-1	Homo sapiens	0	0	0	0	0	2	0	0	0	0	2
9.00	mir-6747	Homo sapiens	0	0	0	0	2	9	2	9	0	0	9
1.00	mir-6786	Homo sapiens	0	0	0	0	0	1	0	1	0	0	1
5.00	mir-6812	Homo sapiens	0	0	0	0	5	5	5	5	0	0	5
47.00	mir-6842	Homo sapiens	0	0	0	0	10	47	10	47	0	0	47
14.00	mir-6843	Homo sapiens	0	0	0	0	9	14	9	14	0	0	14
3.00	mir-6876	Homo sapiens	0	0	0	0	0	3	0	3	0	0	3
4.00	mir-7110	Homo sapiens	0	0	0	0	0	0	0	0	0	4	4
2.00	mir-3690-2	Homo sapiens	0	0	0	0	0	0	0	0	2	2	2
3.00	mir-6511a-2	Homo sapiens	0	0	0	0	0	3	0	0	0	0	3
2.00	mir-6511a-3	Homo sapiens	0	0	0	0	0	2	0	0	0	0	2
3.00	mir-6511a-4	Homo sapiens	0	0	0	0	0	3	0	0	0	0	3
2.00	mir-7155	Homo sapiens	0	0	0	0	0	2	0	2	0	0	2
261.00	mir-7706	Homo sapiens	0	0	0	0	18	242	18	242	17	19	261
18.00	mir-1273h	Homo sapiens	0	0	0	0	0	7	0	7	0	11	18
4.00	mir-6516	Homo sapiens	0	0	0	0	0	4	0	4	0	0	4
10.00	mir-7851	Homo sapiens	0	0	0	0	0	0	0	0	0	10	10
2.00	mir-7976	Homo sapiens	0	0	0	0	0	0	0	0	2	2	2
93.00	mir-8072	Homo sapiens	0	0	0	0	0	0	0	0	0	93	93
48.00	mir-8086	Homo sapiens	0	0	0	0	0	0	0	0	3	48	48
2.00	mir-8485	Homo sapiens	0	0	0	0	0	0	0	0	0	2	2
3.00	mir-3648-2	Homo sapiens	0	0	0	0	0	0	0	0	2	3	3
27.00	mir-941-5	Homo sapiens	0	0	0	0	20	26	0	0	0	1	27
2.00	mir-9902-1	Homo sapiens	0	0	0	0	0	0	0	0	0	2	2
3.00	mir-9903	Homo sapiens	0	0	0	0	0	3	0	3	0	0	3
20.00	mir-10395	Homo sapiens	0	0	0	0	4	20	4	20	0	0	20
22.00	mir-10399	Homo sapiens	0	0	0	0	1	5	1	5	16	17	22
5.00	mir-12136	Homo sapiens	0	0	0	0	0	0	0	0	5	5	5
1.00	mir-9902-2	Homo sapiens	0	0	0	0	0	0	0	0	0	1	1

## Sheet: A7
Expression values	Name	Resource	Exact mature 5'	Mature 5'	Unique exact mature 5'	Unique mature 5'	Exact mature 3'	Mature 3'	Unique exact mature 3'	Unique mature 3'	Exact other	Other	Total
64,765.00	mir-200a	Homo sapiens	425	1066	425	1066	9	63278	9	63211	393	421	64765
56,038.00	mir-21	Homo sapiens	16168	53895	16168	53895	36	43	36	43	1921	2100	56038
48,866.00	mir-34c	Homo sapiens	1213	40125	1213	40119	386	854	386	854	7481	7887	48866
32,015.00	mir-148a	Homo sapiens	15	28	15	28	27094	31587	27094	31544	363	400	32015
24,606.00	let-7b	Homo sapiens	8549	20970	8549	20961	0	12	0	12	3471	3624	24606
23,637.00	mir-200b	Homo sapiens	66	327	66	327	2341	23216	2341	23168	45	94	23637
23,582.00	let-7i	Homo sapiens	17092	22126	17092	22104	0	10	0	10	1313	1446	23582
23,257.00	mir-99a	Homo sapiens	207	23039	207	23016	0	2	0	2	192	216	23257
14,657.00	mir-200c	Homo sapiens	0	0	0	0	2137	14060	2137	14015	552	597	14657
11,614.00	mir-27a	Homo sapiens	16	64	16	64	39	11534	39	11490	13	16	11614
9,088.00	mir-27b	Homo sapiens	0	1	0	1	344	9086	344	9042	1	1	9088
9,008.00	mir-151a	Homo sapiens	37	86	37	86	4680	8819	4680	8819	78	103	9008
8,645.00	mir-375	Homo sapiens	0	0	0	0	1273	7156	1273	7156	1350	1489	8645
8,199.00	mir-30d	Homo sapiens	1789	7659	1789	7648	1	13	1	13	476	527	8199
6,628.00	mir-423	Homo sapiens	1455	5233	1455	5233	343	902	343	902	439	493	6628
6,161.00	let-7g	Homo sapiens	998	5977	998	5956	0	0	0	0	168	184	6161
6,113.00	mir-3074	Homo sapiens	2	5998	2	5998	0	110	0	110	4	5	6113
4,348.00	mir-22	Homo sapiens	3	276	3	276	1187	3675	1187	3675	355	397	4348
3,712.00	mir-146a	Homo sapiens	1118	3695	1118	3660	0	0	0	0	15	17	3712
3,541.00	mir-29a	Homo sapiens	0	0	0	0	79	2545	79	2545	930	996	3541
3,336.00	mir-30a	Homo sapiens	846	2734	846	2732	55	381	55	377	197	221	3336
3,304.00	mir-320a	Homo sapiens	0	0	0	0	781	3273	781	3184	5	31	3304
3,058.00	mir-100	Homo sapiens	21	2927	21	2905	0	0	0	0	121	131	3058
3,026.00	let-7c	Homo sapiens	1505	2717	1505	2706	0	0	0	0	293	309	3026
2,976.00	mir-429	Homo sapiens	0	0	0	0	745	2905	745	2905	68	71	2976
2,954.00	mir-26a-1	Homo sapiens	1935	2910	0	0	0	0	0	0	42	44	2954
2,944.00	mir-26a-2	Homo sapiens	1935	2898	0	0	0	1	0	1	42	45	2944
2,943.00	mir-146b	Homo sapiens	1301	2877	1301	2843	5	44	5	44	21	22	2943
2,299.00	mir-141	Homo sapiens	10	27	10	27	0	1986	0	1920	268	286	2299
2,092.00	let-7a-3	Homo sapiens	177	1831	0	7	3	43	0	1	181	218	2092
2,078.00	let-7a-1	Homo sapiens	177	1828	0	1	3	39	0	0	174	211	2078
2,067.00	let-7f-2	Homo sapiens	221	1958	0	32	0	0	0	0	102	109	2067
2,064.00	mir-34b	Homo sapiens	0	129	0	120	22	1918	22	1918	14	17	2064
2,049.00	let-7f-1	Homo sapiens	221	1926	0	5	0	5	0	5	109	118	2049
2,021.00	let-7a-2	Homo sapiens	177	1818	0	0	0	0	0	0	172	203	2021
2,017.00	mir-1180	Homo sapiens	0	0	0	0	752	1793	752	1793	196	224	2017
2,002.00	mir-203b	Homo sapiens	3	2001	3	2001	0	1	0	1	0	0	2002
1,878.00	mir-142	Homo sapiens	91	167	91	167	21	113	21	113	1438	1598	1878
1,805.00	mir-205	Homo sapiens	558	1784	558	1784	0	0	0	0	20	21	1805
1,800.00	mir-92b	Homo sapiens	1	439	1	439	149	832	149	809	343	529	1800
1,709.00	mir-222	Homo sapiens	0	0	0	0	1034	1669	1034	1669	30	40	1709
1,689.00	mir-181a-2	Homo sapiens	23	1122	0	0	4	32	4	32	496	535	1689
1,685.00	mir-181a-1	Homo sapiens	23	1125	0	0	0	8	0	8	506	552	1685
1,423.00	mir-25	Homo sapiens	6	11	6	11	818	1388	818	1388	11	24	1423
1,290.00	mir-186	Homo sapiens	358	1239	358	1239	0	0	0	0	48	51	1290
1,119.00	mir-99b	Homo sapiens	113	970	113	969	59	96	59	96	47	53	1119
1,086.00	mir-190b	Homo sapiens	474	1086	474	1086	0	0	0	0	0	0	1086
1,019.00	mir-221	Homo sapiens	0	97	0	97	11	556	11	556	333	366	1019
1,015.00	mir-26b	Homo sapiens	463	1013	463	1013	0	2	0	2	0	0	1015
963.00	mir-2110	Homo sapiens	135	880	135	880	0	0	0	0	42	83	963
923.00	mir-449c	Homo sapiens	86	916	86	916	0	0	0	0	5	7	923
913.00	mir-125a	Homo sapiens	8	638	8	638	0	41	0	41	218	234	913
902.00	mir-148b	Homo sapiens	0	13	0	13	376	866	376	825	18	23	902
900.00	mir-182	Homo sapiens	38	645	38	645	0	8	0	8	230	247	900
886.00	mir-30e	Homo sapiens	137	507	137	501	51	226	51	224	130	153	886
874.00	mir-361	Homo sapiens	0	63	0	63	54	700	54	700	108	111	874
854.00	mir-183	Homo sapiens	370	851	370	851	0	0	0	0	0	3	854
816.00	mir-140	Homo sapiens	33	82	33	82	116	657	116	657	30	77	816
766.00	mir-378a	Homo sapiens	4	12	4	12	3	754	3	754	0	0	766
756.00	mir-451a	Homo sapiens	4	755	4	755	0	0	0	0	1	1	756
754.00	mir-101-2	Homo sapiens	0	0	0	0	187	737	0	41	10	17	754
752.00	mir-125b-2	Homo sapiens	49	510	0	0	4	35	4	35	194	207	752
740.00	mir-125b-1	Homo sapiens	49	504	0	0	1	25	1	25	195	211	740
713.00	mir-101-1	Homo sapiens	0	0	0	0	186	701	0	1	10	12	713
683.00	mir-28	Homo sapiens	16	121	16	121	161	542	161	542	16	20	683
672.00	mir-150	Homo sapiens	411	643	411	643	0	23	0	23	6	6	672
648.00	mir-191	Homo sapiens	178	508	178	508	0	0	0	0	127	140	648
602.00	mir-532	Homo sapiens	460	584	460	584	3	17	3	17	1	1	602
588.00	mir-3184	Homo sapiens	0	96	0	96	0	0	0	0	440	492	588
570.00	mir-449a	Homo sapiens	319	536	319	525	0	0	0	0	29	34	570
541.00	mir-342	Homo sapiens	107	383	107	383	28	127	28	127	18	31	541
522.00	mir-224	Homo sapiens	0	258	0	258	0	2	0	2	247	262	522
521.00	mir-92a-1	Homo sapiens	3	4	3	4	222	507	0	46	2	10	521
487.00	mir-92a-2	Homo sapiens	0	0	0	0	221	477	0	10	3	10	487
468.00	let-7d	Homo sapiens	0	407	0	399	0	34	0	34	25	27	468
402.00	mir-192	Homo sapiens	62	256	62	253	0	0	0	0	99	146	402
381.00	mir-128-1	Homo sapiens	0	0	0	0	142	381	0	37	0	0	381
367.00	mir-1307	Homo sapiens	20	28	20	28	0	333	0	333	0	6	367
350.00	mir-340	Homo sapiens	118	305	118	305	8	39	8	39	5	6	350
343.00	mir-128-2	Homo sapiens	0	0	0	0	142	343	0	5	0	0	343
342.00	mir-181b-1	Homo sapiens	26	76	0	0	0	0	0	0	248	266	342
340.00	mir-181b-2	Homo sapiens	26	72	0	0	0	0	0	0	250	268	340
327.00	mir-184	Homo sapiens	0	0	0	0	217	297	217	297	29	30	327
312.00	mir-23a	Homo sapiens	0	7	0	7	0	296	0	296	5	9	312
308.00	mir-363	Homo sapiens	0	2	0	2	216	306	216	306	0	0	308
300.00	mir-24-2	Homo sapiens	0	121	0	121	0	148	0	0	23	31	300
280.00	mir-16-2	Homo sapiens	30	172	0	1	14	69	14	69	38	39	280
266.00	mir-152	Homo sapiens	0	0	0	0	69	262	69	262	0	4	266
247.00	mir-3615	Homo sapiens	0	0	0	0	4	240	4	240	5	7	247
229.00	mir-106b	Homo sapiens	3	15	3	15	18	137	18	137	72	77	229
223.00	mir-155	Homo sapiens	4	189	4	189	0	0	0	0	31	34	223
216.00	mir-574	Homo sapiens	0	2	0	2	102	141	102	141	55	73	216
209.00	mir-23b	Homo sapiens	4	47	4	47	0	62	0	62	53	100	209
206.00	mir-1843	Homo sapiens	3	197	3	197	0	0	0	0	0	9	206
198.00	mir-24-1	Homo sapiens	0	45	0	45	0	149	0	1	4	4	198
197.00	mir-744	Homo sapiens	20	186	20	186	0	0	0	0	9	11	197
189.00	mir-132	Homo sapiens	0	53	0	53	14	56	14	56	75	80	189
187.00	let-7e	Homo sapiens	24	174	24	172	0	0	0	0	9	13	187
183.00	mir-16-1	Homo sapiens	29	174	0	2	0	0	0	0	8	9	183
168.00	mir-3960	Homo sapiens	0	0	0	0	0	16	0	16	0	152	168
152.00	mir-499a	Homo sapiens	24	152	24	152	0	0	0	0	0	0	152
150.00	mir-143	Homo sapiens	0	3	0	3	80	147	80	147	0	0	150
150.00	mir-4446	Homo sapiens	0	0	0	0	67	139	67	139	9	11	150
145.00	mir-223	Homo sapiens	0	17	0	17	30	124	30	124	4	4	145
144.00	mir-7-1	Homo sapiens	41	77	0	0	1	3	1	3	56	64	144
142.00	mir-7-2	Homo sapiens	42	80	0	0	0	0	0	0	55	62	142
139.00	mir-7-3	Homo sapiens	41	78	0	0	0	0	0	0	55	61	139
138.00	mir-135b	Homo sapiens	111	137	111	137	0	1	0	1	0	0	138
138.00	mir-29b-2	Homo sapiens	0	2	0	2	1	67	0	0	61	69	138
134.00	mir-345	Homo sapiens	6	122	6	122	0	0	0	0	11	12	134
131.00	mir-708	Homo sapiens	2	3	2	3	0	112	0	112	16	16	131
129.00	mir-9-2	Homo sapiens	4	48	0	0	1	6	0	0	73	75	129
129.00	mir-9-3	Homo sapiens	4	45	0	0	1	6	0	0	73	78	129
127.00	mir-29b-1	Homo sapiens	0	0	0	0	1	59	0	0	58	68	127
125.00	mir-30c-2	Homo sapiens	25	86	0	0	0	6	0	6	32	33	125
125.00	mir-9-1	Homo sapiens	3	43	0	0	1	7	0	0	71	75	125
123.00	mir-29c	Homo sapiens	0	33	0	33	2	71	2	68	18	19	123
119.00	mir-769	Homo sapiens	52	119	52	119	0	0	0	0	0	0	119
118.00	mir-98	Homo sapiens	27	75	27	72	0	1	0	1	36	42	118
116.00	mir-486-2	Homo sapiens	33	113	0	0	0	3	0	0	0	0	116
116.00	mir-30c-1	Homo sapiens	24	85	0	0	0	0	0	0	28	31	116
115.00	mir-486-1	Homo sapiens	32	112	0	0	0	3	0	0	0	0	115
115.00	mir-32	Homo sapiens	70	107	70	107	0	7	0	7	1	1	115
114.00	mir-425	Homo sapiens	6	79	6	79	0	9	0	9	19	26	114
112.00	mir-10a	Homo sapiens	8	96	8	95	0	0	0	0	16	16	112
112.00	mir-1301	Homo sapiens	0	0	0	0	0	55	0	55	53	57	112
110.00	mir-103b-2	Homo sapiens	18	84	0	0	0	0	0	0	23	26	110
105.00	mir-103b-1	Homo sapiens	19	78	0	0	0	0	0	0	23	27	105
103.00	mir-484	Homo sapiens	29	102	29	102	0	0	0	0	1	1	103
97.00	mir-218-1	Homo sapiens	48	94	0	0	0	0	0	0	2	3	97
97.00	mir-320b-2	Homo sapiens	0	0	0	0	0	96	0	0	0	1	97
96.00	mir-218-2	Homo sapiens	49	95	0	0	0	0	0	0	1	1	96
92.00	mir-320b-1	Homo sapiens	0	0	0	0	0	92	0	0	0	0	92
92.00	mir-7706	Homo sapiens	0	0	0	0	4	88	4	88	4	4	92
81.00	mir-760	Homo sapiens	0	0	0	0	13	81	13	81	0	0	81
80.00	mir-1246	Homo sapiens	0	80	0	80	0	0	0	0	0	0	80
77.00	mir-149	Homo sapiens	1	32	1	32	0	4	0	4	33	41	77
75.00	mir-10400	Homo sapiens	0	75	0	75	0	0	0	0	0	0	75
72.00	mir-8072	Homo sapiens	0	0	0	0	0	0	0	0	0	72	72
70.00	mir-10395	Homo sapiens	0	0	0	0	12	63	12	63	3	7	70
68.00	mir-126	Homo sapiens	0	0	0	0	14	68	14	68	0	0	68
64.00	mir-501	Homo sapiens	0	0	0	0	3	64	3	63	0	0	64
61.00	mir-3529	Homo sapiens	0	0	0	0	0	0	0	0	56	61	61
59.00	mir-181d	Homo sapiens	23	41	23	41	0	0	0	0	16	18	59
59.00	mir-652	Homo sapiens	0	0	0	0	22	59	22	59	0	0	59
58.00	mir-328	Homo sapiens	0	0	0	0	21	54	21	54	3	4	58
57.00	mir-31	Homo sapiens	0	57	0	57	0	0	0	0	0	0	57
57.00	mir-449b	Homo sapiens	24	51	24	40	2	5	2	5	1	1	57
57.00	mir-185	Homo sapiens	1	33	1	33	0	24	0	24	0	0	57
57.00	mir-95	Homo sapiens	0	0	0	0	9	57	9	57	0	0	57
55.00	mir-629	Homo sapiens	36	55	36	55	0	0	0	0	0	0	55
50.00	mir-511	Homo sapiens	21	50	21	50	0	0	0	0	0	0	50
50.00	mir-210	Homo sapiens	0	0	0	0	13	46	13	46	2	4	50
49.00	mir-6510	Homo sapiens	0	0	0	0	14	49	14	49	0	0	49
48.00	mir-30b	Homo sapiens	4	44	4	44	1	1	1	1	3	3	48
47.00	mir-642b	Homo sapiens	27	47	27	47	0	0	0	0	0	0	47
47.00	mir-193a	Homo sapiens	3	46	3	46	0	0	0	0	1	1	47
47.00	mir-651	Homo sapiens	11	43	11	43	0	0	0	0	4	4	47
43.00	mir-96	Homo sapiens	10	43	10	43	0	0	0	0	0	0	43
42.00	mir-3135b	Homo sapiens	0	39	0	39	0	0	0	0	0	3	42
42.00	mir-374a	Homo sapiens	1	27	1	27	1	5	1	5	9	10	42
41.00	mir-330	Homo sapiens	1	27	1	27	1	13	1	13	1	1	41
39.00	mir-1269a	Homo sapiens	0	0	0	0	2	38	2	38	1	1	39
38.00	mir-4423	Homo sapiens	2	37	2	37	0	1	0	1	0	0	38
38.00	mir-625	Homo sapiens	0	30	0	30	0	8	0	8	0	0	38
38.00	mir-941-1	Homo sapiens	0	0	0	0	12	35	0	0	2	3	38
38.00	mir-4485	Homo sapiens	0	0	0	0	0	10	0	10	14	28	38
37.00	mir-324	Homo sapiens	6	9	6	9	0	2	0	2	7	26	37
37.00	mir-452	Homo sapiens	3	7	3	7	0	0	0	0	28	30	37
37.00	mir-8086	Homo sapiens	0	0	0	0	0	0	0	0	3	37	37
36.00	mir-941-4	Homo sapiens	0	0	0	0	12	33	0	0	2	3	36
36.00	mir-941-5	Homo sapiens	0	0	0	0	12	33	0	0	2	3	36
35.00	mir-335	Homo sapiens	0	13	0	13	8	20	8	20	2	2	35
35.00	mir-941-2	Homo sapiens	0	0	0	0	12	32	0	0	2	3	35
35.00	mir-941-3	Homo sapiens	0	0	0	0	12	31	0	0	3	4	35
34.00	mir-194-1	Homo sapiens	1	33	0	0	0	0	0	0	1	1	34
33.00	mir-194-2	Homo sapiens	1	33	0	0	0	0	0	0	0	0	33
33.00	mir-589	Homo sapiens	0	32	0	32	0	0	0	0	0	1	33
31.00	mir-20a	Homo sapiens	31	31	31	31	0	0	0	0	0	0	31
31.00	mir-10399	Homo sapiens	3	6	3	6	0	9	0	9	15	16	31
30.00	mir-1287	Homo sapiens	2	29	2	29	0	0	0	0	1	1	30
30.00	mir-628	Homo sapiens	1	11	1	11	1	19	1	19	0	0	30
30.00	mir-199b	Homo sapiens	1	10	1	10	1	19	0	0	1	1	30
30.00	mir-199a-1	Homo sapiens	3	6	0	0	1	23	0	0	1	1	30
29.00	mir-339	Homo sapiens	3	8	3	8	1	16	1	16	5	5	29
28.00	mir-3159	Homo sapiens	0	0	0	0	0	0	0	0	4	28	28
27.00	mir-378i	Homo sapiens	0	27	0	27	0	0	0	0	0	0	27
27.00	mir-103a-1	Homo sapiens	0	0	0	0	0	0	0	0	24	27	27
26.00	mir-34a	Homo sapiens	8	25	8	25	0	0	0	0	0	1	26
26.00	mir-199a-2	Homo sapiens	2	4	0	0	1	22	0	0	0	0	26
26.00	mir-1285-1	Homo sapiens	0	1	0	1	0	3	0	0	0	22	26
25.00	mir-660	Homo sapiens	8	25	8	25	0	0	0	0	0	0	25
25.00	mir-107	Homo sapiens	0	0	0	0	0	0	0	0	23	25	25
24.00	mir-103a-2	Homo sapiens	0	0	0	0	0	1	0	1	23	23	24
23.00	mir-12136	Homo sapiens	0	2	0	2	0	0	0	0	17	21	23
23.00	mir-197	Homo sapiens	0	0	0	0	3	22	3	22	0	1	23
21.00	mir-618	Homo sapiens	9	21	9	21	0	0	0	0	0	0	21
21.00	mir-374b	Homo sapiens	3	21	3	21	0	0	0	0	0	0	21
21.00	mir-671	Homo sapiens	0	9	0	9	7	12	7	12	0	0	21
21.00	mir-320c-2	Homo sapiens	0	0	0	0	5	19	0	0	0	2	21
21.00	mir-6842	Homo sapiens	0	0	0	0	3	17	3	17	4	4	21
20.00	mir-502	Homo sapiens	0	0	0	0	3	19	3	19	1	1	20
19.00	mir-874	Homo sapiens	0	0	0	0	10	19	10	19	0	0	19
18.00	mir-181c	Homo sapiens	1	11	1	11	0	3	0	3	3	4	18
18.00	mir-19b-1	Homo sapiens	0	0	0	0	3	18	0	0	0	0	18
18.00	mir-320c-1	Homo sapiens	0	0	0	0	5	18	0	0	0	0	18
17.00	mir-598	Homo sapiens	0	0	0	0	0	8	0	8	8	9	17
16.00	mir-193b	Homo sapiens	0	7	0	7	7	9	7	9	0	0	16
16.00	mir-15b	Homo sapiens	2	2	2	2	0	12	0	12	1	2	16
16.00	mir-147b	Homo sapiens	0	0	0	0	0	16	0	16	0	0	16
16.00	mir-1273h	Homo sapiens	0	0	0	0	1	8	1	8	0	8	16
15.00	mir-619	Homo sapiens	0	4	0	4	0	0	0	0	1	11	15
15.00	mir-424	Homo sapiens	0	1	0	1	3	14	3	14	0	0	15
15.00	mir-19a	Homo sapiens	0	0	0	0	0	15	0	15	0	0	15
14.00	mir-3158-1	Homo sapiens	0	14	0	0	0	0	0	0	0	0	14
14.00	mir-3158-2	Homo sapiens	0	14	0	0	0	0	0	0	0	0	14
14.00	mir-212	Homo sapiens	0	3	0	3	0	0	0	0	9	11	14
14.00	mir-19b-2	Homo sapiens	0	0	0	0	2	14	0	0	0	0	14
14.00	mir-582	Homo sapiens	0	0	0	0	11	13	11	13	1	1	14
13.00	mir-503	Homo sapiens	0	1	0	1	0	0	0	0	12	12	13
13.00	mir-187	Homo sapiens	0	0	0	0	0	8	0	8	3	5	13
12.00	mir-942	Homo sapiens	0	12	0	12	0	0	0	0	0	0	12
12.00	mir-9985	Homo sapiens	0	12	0	12	0	0	0	0	0	0	12
12.00	mir-505	Homo sapiens	4	11	4	11	0	1	0	1	0	0	12
12.00	mir-338	Homo sapiens	0	9	0	9	0	0	0	0	3	3	12
12.00	mir-129-1	Homo sapiens	3	7	0	0	0	5	0	5	0	0	12
12.00	mir-766	Homo sapiens	0	3	0	3	0	4	0	4	5	5	12
11.00	mir-455	Homo sapiens	1	11	1	11	0	0	0	0	0	0	11
11.00	mir-1262	Homo sapiens	5	11	5	11	0	0	0	0	0	0	11
11.00	mir-204	Homo sapiens	1	10	1	10	0	0	0	0	1	1	11
11.00	mir-6744	Homo sapiens	0	5	0	5	0	0	0	0	6	6	11
11.00	mir-296	Homo sapiens	3	3	3	3	0	7	0	7	1	1	11
11.00	mir-378c	Homo sapiens	0	2	0	2	0	0	0	0	6	9	11
11.00	mir-1306	Homo sapiens	0	1	0	1	0	10	0	10	0	0	11
11.00	mir-1290	Homo sapiens	0	0	0	0	0	11	0	11	0	0	11
11.00	mir-1303	Homo sapiens	0	0	0	0	5	11	5	11	0	0	11
11.00	mir-1273c	Homo sapiens	0	0	0	0	0	0	0	0	3	11	11
10.00	mir-3613	Homo sapiens	1	10	1	10	0	0	0	0	0	0	10
10.00	mir-4662a	Homo sapiens	8	10	8	10	0	0	0	0	0	0	10
10.00	mir-664a	Homo sapiens	0	3	0	3	4	7	4	7	0	0	10
10.00	mir-3065	Homo sapiens	0	0	0	0	0	8	0	8	2	2	10
9.00	mir-1468	Homo sapiens	2	9	2	9	0	0	0	0	0	0	9
9.00	mir-584	Homo sapiens	0	8	0	8	0	0	0	0	1	1	9
9.00	mir-3614	Homo sapiens	0	4	0	4	0	0	0	0	5	5	9
9.00	mir-3679	Homo sapiens	2	4	2	4	0	0	0	0	5	5	9
9.00	mir-1292	Homo sapiens	0	0	0	0	0	0	0	0	7	9	9
9.00	mir-6747	Homo sapiens	0	0	0	0	3	7	3	7	0	2	9
8.00	mir-129-2	Homo sapiens	3	8	0	0	0	0	0	0	0	0	8
8.00	mir-4488	Homo sapiens	0	8	0	8	0	0	0	0	0	0	8
8.00	mir-548b	Homo sapiens	0	7	0	7	0	0	0	0	1	1	8
8.00	mir-378d-2	Homo sapiens	0	7	0	7	0	0	0	0	0	1	8
8.00	mir-4746	Homo sapiens	2	4	2	4	0	0	0	0	4	4	8
8.00	mir-326	Homo sapiens	0	0	0	0	8	8	8	8	0	0	8
8.00	mir-663a	Homo sapiens	0	0	0	0	0	0	0	0	8	8	8
8.00	mir-1295a	Homo sapiens	0	0	0	0	5	8	5	8	0	0	8
8.00	mir-3929	Homo sapiens	0	0	0	0	0	0	0	0	0	8	8
8.00	mir-5010	Homo sapiens	0	0	0	0	0	8	0	8	0	0	8
8.00	mir-5684	Homo sapiens	0	0	0	0	0	0	0	0	0	8	8
7.00	mir-195	Homo sapiens	1	7	1	7	0	0	0	0	0	0	7
7.00	mir-3913-2	Homo sapiens	0	7	0	0	0	0	0	0	0	0	7
7.00	mir-1295b	Homo sapiens	0	7	0	7	0	0	0	0	0	0	7
7.00	mir-215	Homo sapiens	0	6	0	5	0	0	0	0	0	1	7
7.00	mir-4661	Homo sapiens	0	6	0	6	0	0	0	0	1	1	7
7.00	mir-331	Homo sapiens	0	5	0	5	0	2	0	2	0	0	7
7.00	mir-3605	Homo sapiens	0	5	0	5	0	2	0	2	0	0	7
7.00	mir-6503	Homo sapiens	0	4	0	4	0	3	0	3	0	0	7
7.00	mir-421	Homo sapiens	0	0	0	0	0	7	0	7	0	0	7
7.00	mir-378f	Homo sapiens	0	0	0	0	0	4	0	4	0	3	7
7.00	mir-7110	Homo sapiens	0	0	0	0	0	0	0	0	0	7	7
7.00	mir-7705	Homo sapiens	0	0	0	0	0	0	0	0	7	7	7
6.00	mir-450a-2	Homo sapiens	0	6	0	0	0	0	0	0	0	0	6
6.00	mir-556	Homo sapiens	0	6	0	6	0	0	0	0	0	0	6
6.00	mir-3622a	Homo sapiens	1	6	1	6	0	0	0	0	0	0	6
6.00	mir-3913-1	Homo sapiens	0	6	0	0	0	0	0	0	0	0	6
6.00	mir-6501	Homo sapiens	0	6	0	6	0	0	0	0	0	0	6
6.00	mir-7704	Homo sapiens	0	6	0	6	0	0	0	0	0	0	6
6.00	mir-365a	Homo sapiens	0	4	0	4	1	2	0	0	0	0	6
6.00	mir-877	Homo sapiens	1	2	1	2	0	0	0	0	1	4	6
6.00	mir-130a	Homo sapiens	0	0	0	0	0	6	0	6	0	0	6
6.00	mir-500a	Homo sapiens	0	0	0	0	2	5	2	5	1	1	6
6.00	mir-514a-1	Homo sapiens	0	0	0	0	4	5	0	0	1	1	6
6.00	mir-1285-2	Homo sapiens	0	0	0	0	1	6	0	0	0	0	6
6.00	mir-320d-2	Homo sapiens	0	0	0	0	3	6	0	0	0	0	6
6.00	mir-3135a	Homo sapiens	0	0	0	0	0	0	0	0	0	6	6
6.00	mir-4326	Homo sapiens	0	0	0	0	0	0	0	0	5	6	6
6.00	mir-3909	Homo sapiens	0	0	0	0	0	2	0	2	4	4	6
6.00	mir-4430	Homo sapiens	0	0	0	0	0	0	0	0	0	6	6
6.00	mir-4664	Homo sapiens	0	0	0	0	0	6	0	6	0	0	6
6.00	mir-6868	Homo sapiens	0	0	0	0	0	6	0	6	0	0	6
5.00	mir-10b	Homo sapiens	0	5	0	5	0	0	0	0	0	0	5
5.00	mir-450a-1	Homo sapiens	0	5	0	0	0	0	0	0	0	0	5
5.00	mir-504	Homo sapiens	0	5	0	5	0	0	0	0	0	0	5
5.00	mir-579	Homo sapiens	5	5	5	5	0	0	0	0	0	0	5
5.00	mir-659	Homo sapiens	5	5	5	5	0	0	0	0	0	0	5
5.00	mir-934	Homo sapiens	0	5	0	5	0	0	0	0	0	0	5
5.00	mir-4726	Homo sapiens	0	5	0	5	0	0	0	0	0	0	5
5.00	mir-6516	Homo sapiens	0	5	0	5	0	0	0	0	0	0	5
5.00	mir-548i-1	Homo sapiens	1	4	0	0	0	0	0	0	1	1	5
5.00	mir-548i-4	Homo sapiens	0	4	0	0	0	0	0	0	1	1	5
5.00	mir-17	Homo sapiens	0	3	0	3	0	2	0	2	0	0	5
5.00	mir-2277	Homo sapiens	0	3	0	3	0	0	0	0	2	2	5
5.00	mir-203a	Homo sapiens	0	0	0	0	0	5	0	5	0	0	5
5.00	mir-130b	Homo sapiens	0	0	0	0	0	5	0	5	0	0	5
5.00	mir-514a-2	Homo sapiens	0	0	0	0	3	4	0	0	1	1	5
5.00	mir-873	Homo sapiens	0	0	0	0	0	0	0	0	4	5	5
5.00	mir-548f-3	Homo sapiens	0	0	0	0	0	3	0	0	0	2	5
5.00	mir-320d-1	Homo sapiens	0	0	0	0	2	5	0	2	0	0	5
5.00	mir-3127	Homo sapiens	0	0	0	0	0	5	0	5	0	0	5
5.00	mir-4472-2	Homo sapiens	0	0	0	0	0	0	0	0	2	5	5
4.00	mir-15a	Homo sapiens	0	4	0	4	0	0	0	0	0	0	4
4.00	mir-196b	Homo sapiens	0	4	0	3	0	0	0	0	0	0	4
4.00	mir-422a	Homo sapiens	0	4	0	4	0	0	0	0	0	0	4
4.00	mir-548f-1	Homo sapiens	0	4	0	4	0	0	0	0	0	0	4
4.00	mir-548i-3	Homo sapiens	0	4	0	0	0	0	0	0	0	0	4
4.00	mir-3617	Homo sapiens	0	4	0	4	0	0	0	0	0	0	4
4.00	mir-3918	Homo sapiens	4	4	4	4	0	0	0	0	0	0	4
4.00	mir-4508	Homo sapiens	0	4	0	4	0	0	0	0	0	0	4
4.00	mir-509-3	Homo sapiens	0	3	0	3	0	0	0	0	1	1	4
4.00	mir-548aj-2	Homo sapiens	0	2	0	0	0	0	0	0	0	2	4
4.00	mir-144	Homo sapiens	1	1	1	1	2	3	2	3	0	0	4
4.00	mir-454	Homo sapiens	0	1	0	1	3	3	3	3	0	0	4
4.00	mir-18a	Homo sapiens	0	0	0	0	0	4	0	4	0	0	4
4.00	mir-153-2	Homo sapiens	0	0	0	0	2	4	0	0	0	0	4
4.00	mir-514a-3	Homo sapiens	0	0	0	0	4	4	0	0	0	0	4
4.00	mir-632	Homo sapiens	0	0	0	0	0	0	0	0	4	4	4
4.00	mir-548e	Homo sapiens	0	0	0	0	0	4	0	4	0	0	4
4.00	mir-1304	Homo sapiens	0	0	0	0	0	0	0	0	2	4	4
4.00	mir-548f-2	Homo sapiens	0	0	0	0	0	2	0	0	0	2	4
4.00	mir-1248	Homo sapiens	0	0	0	0	0	0	0	0	3	4	4
4.00	mir-3194	Homo sapiens	0	0	0	0	0	0	0	0	3	4	4
4.00	mir-3648-1	Homo sapiens	0	0	0	0	0	0	0	0	4	4	4
4.00	mir-3908	Homo sapiens	0	0	0	0	0	0	0	0	0	4	4
4.00	mir-4449	Homo sapiens	0	0	0	0	0	4	0	4	0	0	4
4.00	mir-4520-1	Homo sapiens	0	0	0	0	0	4	0	4	0	0	4
4.00	mir-4677	Homo sapiens	0	0	0	0	0	3	0	3	1	1	4
4.00	mir-5585	Homo sapiens	0	0	0	0	0	2	0	2	0	2	4
4.00	mir-6818	Homo sapiens	0	0	0	0	0	0	0	0	4	4	4
4.00	mir-6843	Homo sapiens	0	0	0	0	4	4	4	4	0	0	4
4.00	mir-6855	Homo sapiens	0	0	0	0	0	0	0	0	3	4	4
3.00	mir-139	Homo sapiens	2	3	2	3	0	0	0	0	0	0	3
3.00	mir-642a	Homo sapiens	0	3	0	3	0	0	0	0	0	0	3
3.00	mir-1266	Homo sapiens	3	3	3	3	0	0	0	0	0	0	3
3.00	mir-548i-2	Homo sapiens	0	3	0	0	0	0	0	0	0	0	3
3.00	mir-3133	Homo sapiens	0	3	0	3	0	0	0	0	0	0	3
3.00	mir-3180-4	Homo sapiens	1	3	0	0	0	0	0	0	0	0	3
3.00	mir-3911	Homo sapiens	3	3	3	3	0	0	0	0	0	0	3
3.00	mir-4429	Homo sapiens	0	3	0	3	0	0	0	0	0	0	3
3.00	mir-6514	Homo sapiens	0	3	0	3	0	0	0	0	0	0	3
3.00	mir-6805	Homo sapiens	0	3	0	3	0	0	0	0	0	0	3
3.00	mir-6877	Homo sapiens	0	3	0	3	0	0	0	0	0	0	3
3.00	mir-6887	Homo sapiens	0	3	0	3	0	0	0	0	0	0	3
3.00	mir-1296	Homo sapiens	1	2	1	2	0	0	0	0	1	1	3
3.00	mir-1228	Homo sapiens	0	2	0	2	0	0	0	0	1	1	3
3.00	mir-1291	Homo sapiens	0	2	0	2	0	0	0	0	1	1	3
3.00	mir-219a-1	Homo sapiens	0	0	0	0	0	1	0	1	2	2	3
3.00	mir-1-2	Homo sapiens	0	0	0	0	2	3	0	0	0	0	3
3.00	mir-153-1	Homo sapiens	0	0	0	0	2	3	0	0	0	0	3
3.00	mir-1-1	Homo sapiens	0	0	0	0	2	3	0	0	0	0	3
3.00	mir-508	Homo sapiens	0	0	0	0	3	3	3	3	0	0	3
3.00	mir-1299	Homo sapiens	0	0	0	0	0	2	0	2	0	1	3
3.00	mir-2278	Homo sapiens	0	0	0	0	0	0	0	0	3	3	3
3.00	mir-3187	Homo sapiens	0	0	0	0	0	3	0	3	0	0	3
3.00	mir-3665	Homo sapiens	0	0	0	0	0	0	0	0	0	3	3
3.00	mir-3928	Homo sapiens	0	0	0	0	0	3	0	3	0	0	3
3.00	mir-3944	Homo sapiens	0	0	0	0	0	0	0	0	3	3	3
3.00	mir-4448	Homo sapiens	0	0	0	0	0	3	0	3	0	0	3
3.00	mir-4504	Homo sapiens	0	0	0	0	0	3	0	3	0	0	3
3.00	mir-5696	Homo sapiens	0	0	0	0	0	0	0	0	0	3	3
3.00	mir-6500	Homo sapiens	0	0	0	0	0	3	0	3	0	0	3
3.00	mir-6787	Homo sapiens	0	0	0	0	0	0	0	0	3	3	3
3.00	mir-6851	Homo sapiens	0	0	0	0	0	0	0	0	3	3	3
3.00	mir-7851	Homo sapiens	0	0	0	0	0	0	0	0	0	3	3
3.00	mir-8485	Homo sapiens	0	0	0	0	0	1	0	1	2	2	3
3.00	mir-3648-2	Homo sapiens	0	0	0	0	0	0	0	0	2	3	3
2.00	mir-214	Homo sapiens	0	2	0	2	0	0	0	0	0	0	2
2.00	mir-145	Homo sapiens	0	2	0	2	0	0	0	0	0	0	2
2.00	mir-188	Homo sapiens	2	2	2	2	0	0	0	0	0	0	2
2.00	mir-301a	Homo sapiens	2	2	2	2	0	0	0	0	0	0	2
2.00	mir-2114	Homo sapiens	0	2	0	2	0	0	0	0	0	0	2
2.00	mir-3620	Homo sapiens	0	2	0	2	0	0	0	0	0	0	2
2.00	mir-3652	Homo sapiens	0	2	0	2	0	0	0	0	0	0	2
2.00	mir-3664	Homo sapiens	0	2	0	2	0	0	0	0	0	0	2
2.00	mir-3690-1	Homo sapiens	0	2	0	0	0	0	0	0	0	0	2
2.00	mir-548ae-2	Homo sapiens	0	2	0	2	0	0	0	0	0	0	2
2.00	mir-4659b	Homo sapiens	0	2	0	2	0	0	0	0	0	0	2
2.00	mir-4520-2	Homo sapiens	0	2	0	0	0	0	0	0	0	0	2
2.00	mir-4728	Homo sapiens	0	2	0	2	0	0	0	0	0	0	2
2.00	mir-5701-2	Homo sapiens	0	2	0	0	0	0	0	0	0	0	2
2.00	mir-6733	Homo sapiens	0	2	0	2	0	0	0	0	0	0	2
2.00	mir-6736	Homo sapiens	0	2	0	2	0	0	0	0	0	0	2
2.00	mir-6748	Homo sapiens	0	2	0	2	0	0	0	0	0	0	2
2.00	mir-5701-3	Homo sapiens	0	2	0	0	0	0	0	0	0	0	2
2.00	mir-10397	Homo sapiens	0	2	0	2	0	0	0	0	0	0	2
2.00	mir-548g	Homo sapiens	0	1	0	0	0	0	0	0	0	1	2
2.00	mir-4748	Homo sapiens	0	1	0	1	0	0	0	0	1	1	2
2.00	mir-127	Homo sapiens	0	0	0	0	0	2	0	2	0	0	2
2.00	mir-576	Homo sapiens	0	0	0	0	0	0	0	0	2	2	2
2.00	mir-641	Homo sapiens	0	0	0	0	0	0	0	0	2	2	2
2.00	mir-653	Homo sapiens	0	0	0	0	0	0	0	0	1	2	2
2.00	mir-944	Homo sapiens	0	0	0	0	0	2	0	2	0	0	2
2.00	mir-1268a	Homo sapiens	0	0	0	0	0	0	0	0	0	2	2
2.00	mir-548q	Homo sapiens	0	0	0	0	0	0	0	0	0	2	2
2.00	mir-3157	Homo sapiens	0	0	0	0	1	2	1	2	0	0	2
2.00	mir-3179-2	Homo sapiens	0	0	0	0	1	2	0	0	0	0	2
2.00	mir-3195	Homo sapiens	0	0	0	0	0	0	0	0	0	2	2
2.00	mir-2355	Homo sapiens	0	0	0	0	0	2	0	2	0	0	2
2.00	mir-4277	Homo sapiens	0	0	0	0	0	0	0	0	0	2	2
2.00	mir-3659	Homo sapiens	0	0	0	0	0	2	0	2	0	0	2
2.00	mir-548o-2	Homo sapiens	0	0	0	0	1	2	0	0	0	0	2
2.00	mir-4473	Homo sapiens	0	0	0	0	0	2	0	2	0	0	2
2.00	mir-4491	Homo sapiens	0	0	0	0	0	2	0	2	0	0	2
2.00	mir-4512	Homo sapiens	0	0	0	0	0	0	0	0	0	2	2
2.00	mir-4521	Homo sapiens	0	0	0	0	0	0	0	0	2	2	2
2.00	mir-4529	Homo sapiens	0	0	0	0	0	0	0	0	1	2	2
2.00	mir-4687	Homo sapiens	0	0	0	0	0	2	0	2	0	0	2
2.00	mir-4733	Homo sapiens	0	0	0	0	0	0	0	0	2	2	2
2.00	mir-5089	Homo sapiens	0	0	0	0	0	2	0	2	0	0	2
2.00	mir-5090	Homo sapiens	0	0	0	0	0	0	0	0	2	2	2
2.00	mir-5196	Homo sapiens	0	0	0	0	0	2	0	2	0	0	2
2.00	mir-6130	Homo sapiens	0	0	0	0	0	0	0	0	0	2	2
2.00	mir-6511a-1	Homo sapiens	0	0	0	0	0	1	0	0	1	1	2
2.00	mir-6770-1	Homo sapiens	0	0	0	0	0	2	0	0	0	0	2
2.00	mir-6875	Homo sapiens	0	0	0	0	0	0	0	0	2	2	2
2.00	mir-6511a-2	Homo sapiens	0	0	0	0	0	2	0	0	0	0	2
2.00	mir-7854	Homo sapiens	0	0	0	0	0	2	0	2	0	0	2
2.00	mir-6770-2	Homo sapiens	0	0	0	0	0	2	0	0	0	0	2
1.00	mir-196a-2	Homo sapiens	0	1	0	0	0	0	0	0	0	0	1
1.00	mir-122	Homo sapiens	0	1	0	1	0	0	0	0	0	0	1
1.00	mir-509-1	Homo sapiens	0	1	0	0	0	0	0	0	0	0	1
1.00	mir-561	Homo sapiens	0	1	0	1	0	0	0	0	0	0	1
1.00	mir-581	Homo sapiens	0	1	0	1	0	0	0	0	0	0	1
1.00	mir-592	Homo sapiens	0	1	0	1	0	0	0	0	0	0	1
1.00	mir-616	Homo sapiens	0	1	0	1	0	0	0	0	0	0	1
1.00	mir-550a-3	Homo sapiens	0	1	0	1	0	0	0	0	0	0	1
1.00	mir-1224	Homo sapiens	0	1	0	1	0	0	0	0	0	0	1
1.00	mir-937	Homo sapiens	0	1	0	1	0	0	0	0	0	0	1
1.00	mir-1293	Homo sapiens	0	1	0	1	0	0	0	0	0	0	1
1.00	mir-548n	Homo sapiens	1	1	1	1	0	0	0	0	0	0	1
1.00	mir-1276	Homo sapiens	0	1	0	1	0	0	0	0	0	0	1
1.00	mir-2115	Homo sapiens	0	1	0	1	0	0	0	0	0	0	1
1.00	mir-3150a	Homo sapiens	0	1	0	1	0	0	0	0	0	0	1
1.00	mir-3173	Homo sapiens	0	1	0	1	0	0	0	0	0	0	1
1.00	mir-3191	Homo sapiens	0	1	0	1	0	0	0	0	0	0	1
1.00	mir-548x	Homo sapiens	0	1	0	0	0	0	0	0	0	0	1
1.00	mir-3180-5	Homo sapiens	0	1	0	0	0	0	0	0	0	0	1
1.00	mir-3934	Homo sapiens	0	1	0	1	0	0	0	0	0	0	1
1.00	mir-378g	Homo sapiens	0	1	0	1	0	0	0	0	0	0	1
1.00	mir-4431	Homo sapiens	1	1	1	1	0	0	0	0	0	0	1
1.00	mir-4466	Homo sapiens	0	1	0	1	0	0	0	0	0	0	1
1.00	mir-4489	Homo sapiens	1	1	1	1	0	0	0	0	0	0	1
1.00	mir-4652	Homo sapiens	0	1	0	1	0	0	0	0	0	0	1
1.00	mir-4724	Homo sapiens	0	1	0	1	0	0	0	0	0	0	1
1.00	mir-3064	Homo sapiens	0	1	0	1	0	0	0	0	0	0	1
1.00	mir-4767	Homo sapiens	0	1	0	1	0	0	0	0	0	0	1
1.00	mir-4776-1	Homo sapiens	1	1	0	0	0	0	0	0	0	0	1
1.00	mir-5187	Homo sapiens	0	1	0	1	0	0	0	0	0	0	1
1.00	mir-664b	Homo sapiens	0	1	0	1	0	0	0	0	0	0	1
1.00	mir-5701-1	Homo sapiens	0	1	0	0	0	0	0	0	0	0	1
1.00	mir-6499	Homo sapiens	1	1	1	1	0	0	0	0	0	0	1
1.00	mir-548az	Homo sapiens	0	1	0	1	0	0	0	0	0	0	1
1.00	mir-6515	Homo sapiens	0	1	0	1	0	0	0	0	0	0	1
1.00	mir-6729	Homo sapiens	0	1	0	1	0	0	0	0	0	0	1
1.00	mir-6779	Homo sapiens	0	1	0	1	0	0	0	0	0	0	1
1.00	mir-6807	Homo sapiens	1	1	1	1	0	0	0	0	0	0	1
1.00	mir-6821	Homo sapiens	0	1	0	1	0	0	0	0	0	0	1
1.00	mir-6878	Homo sapiens	0	1	0	1	0	0	0	0	0	0	1
1.00	mir-6894	Homo sapiens	0	1	0	1	0	0	0	0	0	0	1
1.00	mir-3690-2	Homo sapiens	0	1	0	0	0	0	0	0	0	0	1
1.00	mir-7845	Homo sapiens	0	1	0	1	0	0	0	0	0	0	1
1.00	mir-10527	Homo sapiens	0	1	0	1	0	0	0	0	0	0	1
1.00	mir-93	Homo sapiens	0	0	0	0	0	1	0	1	0	0	1
1.00	mir-133a-1	Homo sapiens	0	0	0	0	0	1	0	0	0	0	1
1.00	mir-133a-2	Homo sapiens	0	0	0	0	0	1	0	0	0	0	1
1.00	mir-20b	Homo sapiens	0	0	0	0	0	0	0	0	1	1	1
1.00	mir-495	Homo sapiens	0	0	0	0	1	1	1	1	0	0	1
1.00	mir-551b	Homo sapiens	0	0	0	0	0	1	0	1	0	0	1
1.00	mir-580	Homo sapiens	0	0	0	0	0	0	0	0	1	1	1
1.00	mir-597	Homo sapiens	0	0	0	0	0	1	0	1	0	0	1
1.00	mir-33b	Homo sapiens	0	0	0	0	0	1	0	1	0	0	1
1.00	mir-636	Homo sapiens	0	0	0	0	0	0	0	0	0	1	1
1.00	mir-662	Homo sapiens	0	0	0	0	0	0	0	0	1	1	1
1.00	mir-542	Homo sapiens	0	0	0	0	0	1	0	1	0	0	1
1.00	mir-876	Homo sapiens	0	0	0	0	0	1	0	1	0	0	1
1.00	mir-887	Homo sapiens	0	0	0	0	0	0	0	0	1	1	1
1.00	mir-935	Homo sapiens	0	0	0	0	0	1	0	1	0	0	1
1.00	mir-1181	Homo sapiens	0	0	0	0	0	0	0	0	0	1	1
1.00	mir-1226	Homo sapiens	0	0	0	0	0	0	0	0	1	1	1
1.00	mir-1229	Homo sapiens	0	0	0	0	0	0	0	0	0	1	1
1.00	mir-548o	Homo sapiens	0	0	0	0	1	1	0	0	0	0	1
1.00	mir-548h-3	Homo sapiens	0	0	0	0	0	0	0	0	0	1	1
1.00	mir-1278	Homo sapiens	0	0	0	0	0	1	0	1	0	0	1
1.00	mir-513c	Homo sapiens	0	0	0	0	0	0	0	0	1	1	1
1.00	mir-1914	Homo sapiens	0	0	0	0	0	1	0	1	0	0	1
1.00	mir-1976	Homo sapiens	0	0	0	0	0	1	0	1	0	0	1
1.00	mir-3129	Homo sapiens	0	0	0	0	0	1	0	1	0	0	1
1.00	mir-3138	Homo sapiens	0	0	0	0	0	1	0	1	0	0	1
1.00	mir-3144	Homo sapiens	0	0	0	0	0	0	0	0	1	1	1
1.00	mir-3149	Homo sapiens	0	0	0	0	0	0	0	0	0	1	1
1.00	mir-3154	Homo sapiens	0	0	0	0	0	0	0	0	1	1	1
1.00	mir-3166	Homo sapiens	0	0	0	0	0	0	0	0	1	1	1
1.00	mir-3179-1	Homo sapiens	0	0	0	0	1	1	0	0	0	0	1
1.00	mir-3180-3	Homo sapiens	0	0	0	0	0	1	0	0	0	0	1
1.00	mir-3179-3	Homo sapiens	0	0	0	0	1	1	0	0	0	0	1
1.00	mir-3196	Homo sapiens	0	0	0	0	0	0	0	0	0	1	1
1.00	mir-3927	Homo sapiens	0	0	0	0	0	1	0	1	0	0	1
1.00	mir-3940	Homo sapiens	0	0	0	0	0	1	0	1	0	0	1
1.00	mir-378d-1	Homo sapiens	0	0	0	0	0	0	0	0	0	1	1
1.00	mir-378e	Homo sapiens	0	0	0	0	0	1	0	1	0	0	1
1.00	mir-4635	Homo sapiens	0	0	0	0	0	1	0	1	0	0	1
1.00	mir-4645	Homo sapiens	0	0	0	0	0	1	0	1	0	0	1
1.00	mir-4648	Homo sapiens	0	0	0	0	0	0	0	0	0	1	1
1.00	mir-4658	Homo sapiens	0	0	0	0	0	0	0	0	1	1	1
1.00	mir-4659a	Homo sapiens	0	0	0	0	0	1	0	1	0	0	1
1.00	mir-1343	Homo sapiens	0	0	0	0	0	1	0	1	0	0	1
1.00	mir-4688	Homo sapiens	0	0	0	0	0	1	0	1	0	0	1
1.00	mir-4738	Homo sapiens	0	0	0	0	0	1	0	1	0	0	1
1.00	mir-4745	Homo sapiens	0	0	0	0	0	0	0	0	1	1	1
1.00	mir-4758	Homo sapiens	0	0	0	0	0	0	0	0	1	1	1
1.00	mir-4772	Homo sapiens	0	0	0	0	1	1	1	1	0	0	1
1.00	mir-4778	Homo sapiens	0	0	0	0	0	0	0	0	0	1	1
1.00	mir-4436b-1	Homo sapiens	0	0	0	0	0	0	0	0	1	1	1
1.00	mir-4787	Homo sapiens	0	0	0	0	0	1	0	1	0	0	1
1.00	mir-5001	Homo sapiens	0	0	0	0	0	0	0	0	1	1	1
1.00	mir-5193	Homo sapiens	0	0	0	0	1	1	1	1	0	0	1
1.00	mir-4444-2	Homo sapiens	0	0	0	0	0	1	0	0	0	0	1
1.00	mir-6793	Homo sapiens	0	0	0	0	0	0	0	0	1	1	1
1.00	mir-6803	Homo sapiens	0	0	0	0	0	1	0	1	0	0	1
1.00	mir-6806	Homo sapiens	0	0	0	0	0	1	0	1	0	0	1
1.00	mir-6814	Homo sapiens	0	0	0	0	0	0	0	0	1	1	1
1.00	mir-6827	Homo sapiens	0	0	0	0	0	1	0	1	0	0	1
1.00	mir-6873	Homo sapiens	0	0	0	0	0	1	0	1	0	0	1
1.00	mir-6874	Homo sapiens	0	0	0	0	1	1	1	1	0	0	1
1.00	mir-6889	Homo sapiens	0	0	0	0	0	1	0	1	0	0	1
1.00	mir-6511a-3	Homo sapiens	0	0	0	0	0	1	0	0	0	0	1
1.00	mir-6511a-4	Homo sapiens	0	0	0	0	0	1	0	0	0	0	1
1.00	mir-7850	Homo sapiens	0	0	0	0	0	0	0	0	0	1	1
1.00	mir-8064	Homo sapiens	0	0	0	0	0	0	0	0	0	1	1
1.00	mir-6770-3	Homo sapiens	0	0	0	0	0	1	0	0	0	0	1
1.00	mir-3179-4	Homo sapiens	0	0	0	0	0	1	0	0	0	0	1
1.00	mir-10392	Homo sapiens	0	0	0	0	0	0	0	0	0	1	1
1.00	mir-10401	Homo sapiens	0	0	0	0	0	0	0	0	1	1	1
0.00	mir-196a-1	Homo sapiens	0	0	0	0	0	0	0	0	0	0	0
0.00	mir-365b	Homo sapiens	0	0	0	0	0	0	0	0	0	0	0
0.00	mir-509-2	Homo sapiens	0	0	0	0	0	0	0	0	0	0	0
0.00	mir-548f-4	Homo sapiens	0	0	0	0	0	0	0	0	0	0	0
0.00	mir-3180-1	Homo sapiens	0	0	0	0	0	0	0	0	0	0	0
0.00	mir-3180-2	Homo sapiens	0	0	0	0	0	0	0	0	0	0	0
0.00	mir-4444-1	Homo sapiens	0	0	0	0	0	0	0	0	0	0	0
0.00	mir-4510	Homo sapiens	0	0	0	0	0	0	0	0	0	0	0
0.00	mir-451b	Homo sapiens	0	0	0	0	0	0	0	0	0	0	0
0.00	mir-4776-2	Homo sapiens	0	0	0	0	0	0	0	0	0	0	0
0.00	mir-4436b-2	Homo sapiens	0	0	0	0	0	0	0	0	0	0	0
0.00	mir-6125	Homo sapiens	0	0	0	0	0	0	0	0	0	0	0
0.00	mir-6511b-1	Homo sapiens	0	0	0	0	0	0	0	0	0	0	0
0.00	mir-6511b-2	Homo sapiens	0	0	0	0	0	0	0	0	0	0	0

## Sheet: B1
Expression values	Name	Resource	Exact mature 5'	Mature 5'	Unique exact mature 5'	Unique mature 5'	Exact mature 3'	Mature 3'	Unique exact mature 3'	Unique mature 3'	Exact other	Other	Total
58,151.00	mir-148a	Homo sapiens	22	34	22	34	51060	57826	51060	57754	266	291	58151
56,689.00	mir-21	Homo sapiens	14286	53585	14286	53585	16	24	16	24	2808	3080	56689
53,779.00	mir-200a	Homo sapiens	520	1293	520	1293	13	51982	13	51929	473	504	53779
33,842.00	mir-99a	Homo sapiens	446	33560	446	33529	0	0	0	0	249	282	33842
28,574.00	mir-34c	Homo sapiens	1449	23830	1449	23827	390	762	390	762	3764	3982	28574
28,496.00	mir-200b	Homo sapiens	62	328	62	328	1361	28067	1361	28015	54	101	28496
16,689.00	mir-200c	Homo sapiens	0	2	0	2	2378	15952	2378	15902	678	735	16689
15,700.00	let-7b	Homo sapiens	3703	11072	3703	11062	0	11	0	11	4382	4617	15700
13,102.00	mir-27a	Homo sapiens	13	61	13	61	53	13031	53	12950	10	10	13102
11,436.00	mir-27b	Homo sapiens	0	0	0	0	362	11419	362	11342	4	17	11436
9,874.00	mir-375	Homo sapiens	0	0	0	0	1450	8963	1450	8963	831	911	9874
9,765.00	mir-151a	Homo sapiens	26	52	26	52	5883	9618	5883	9618	69	95	9765
8,243.00	mir-3074	Homo sapiens	3	8086	3	8086	0	153	0	153	4	4	8243
8,017.00	let-7i	Homo sapiens	5303	6821	5303	6811	0	7	0	7	1075	1189	8017
6,466.00	mir-26a-2	Homo sapiens	4860	6391	0	0	0	2	0	2	65	73	6466
6,443.00	mir-26a-1	Homo sapiens	4859	6375	0	0	0	0	0	0	64	68	6443
5,218.00	mir-30d	Homo sapiens	1147	4694	1147	4689	0	16	0	15	463	508	5218
4,452.00	mir-429	Homo sapiens	0	0	0	0	1254	4391	1254	4391	58	61	4452
4,236.00	let-7g	Homo sapiens	1175	4074	1175	4063	0	0	0	0	137	162	4236
3,567.00	let-7c	Homo sapiens	1620	2862	1620	2852	0	2	0	1	671	703	3567
3,348.00	mir-423	Homo sapiens	626	2709	626	2709	190	457	190	457	163	182	3348
3,155.00	mir-141	Homo sapiens	32	68	32	68	0	2812	0	2760	254	275	3155
2,990.00	mir-22	Homo sapiens	11	468	11	468	995	2383	995	2383	131	139	2990
2,856.00	let-7f-2	Homo sapiens	347	2701	0	217	0	0	0	0	142	155	2856
2,656.00	let-7f-1	Homo sapiens	347	2488	0	6	0	8	0	8	149	160	2656
2,607.00	mir-205	Homo sapiens	970	2575	970	2575	0	3	0	3	15	29	2607
2,405.00	mir-30a	Homo sapiens	713	1916	713	1912	52	270	52	252	201	219	2405
2,400.00	mir-29a	Homo sapiens	0	0	0	0	39	1621	39	1621	720	779	2400
2,058.00	let-7a-3	Homo sapiens	123	1668	0	1	0	36	0	1	283	354	2058
2,055.00	let-7a-1	Homo sapiens	122	1676	0	0	1	37	0	0	278	342	2055
2,005.00	let-7a-2	Homo sapiens	123	1669	0	0	0	0	0	0	274	336	2005
1,967.00	mir-146a	Homo sapiens	663	1961	663	1940	0	0	0	0	5	6	1967
1,831.00	mir-92b	Homo sapiens	0	185	0	185	321	1237	321	1222	279	409	1831
1,674.00	mir-203b	Homo sapiens	3	1672	3	1672	0	0	0	0	2	2	1674
1,636.00	mir-100	Homo sapiens	10	1566	10	1535	0	0	0	0	65	70	1636
1,625.00	mir-449a	Homo sapiens	896	1540	896	1516	0	0	0	0	71	85	1625
1,486.00	mir-26b	Homo sapiens	590	1484	590	1483	2	2	2	2	0	0	1486
1,393.00	mir-320a	Homo sapiens	0	0	0	0	397	1371	397	1339	0	22	1393
1,388.00	mir-191	Homo sapiens	772	1328	772	1328	0	3	0	3	54	57	1388
1,360.00	mir-146b	Homo sapiens	443	1343	443	1324	1	5	1	5	12	12	1360
1,300.00	mir-181a-2	Homo sapiens	15	878	0	0	3	35	3	35	356	387	1300
1,284.00	mir-181a-1	Homo sapiens	16	878	0	0	1	10	1	10	362	396	1284
1,283.00	mir-186	Homo sapiens	344	1217	344	1217	0	0	0	0	59	66	1283
1,260.00	mir-1180	Homo sapiens	0	0	0	0	492	1148	492	1148	93	112	1260
1,225.00	mir-222	Homo sapiens	0	1	0	1	692	1186	692	1186	29	38	1225
1,151.00	mir-449c	Homo sapiens	137	1039	137	1039	0	3	0	3	28	109	1151
1,140.00	mir-34b	Homo sapiens	0	62	0	58	10	1046	10	1046	29	32	1140
1,133.00	mir-25	Homo sapiens	3	9	3	9	613	1100	613	1100	18	24	1133
1,078.00	mir-30e	Homo sapiens	202	568	202	565	73	277	73	260	197	233	1078
953.00	mir-182	Homo sapiens	61	742	61	742	0	6	0	6	175	205	953
867.00	mir-378a	Homo sapiens	10	16	10	16	0	851	0	851	0	0	867
845.00	mir-361	Homo sapiens	1	48	1	48	53	706	53	706	85	91	845
789.00	mir-142	Homo sapiens	23	58	23	58	1	45	1	45	607	686	789
766.00	mir-221	Homo sapiens	1	119	1	119	19	408	19	408	214	239	766
725.00	mir-183	Homo sapiens	356	724	356	724	0	0	0	0	0	1	725
697.00	mir-99b	Homo sapiens	99	603	99	601	32	55	32	55	38	39	697
692.00	mir-1307	Homo sapiens	36	48	36	48	0	644	0	644	0	0	692
683.00	mir-10400	Homo sapiens	0	683	0	683	0	0	0	0	0	0	683
626.00	mir-140	Homo sapiens	20	54	20	54	95	508	95	508	23	64	626
594.00	mir-28	Homo sapiens	9	291	9	291	97	292	97	292	8	11	594
523.00	mir-128-1	Homo sapiens	0	0	0	0	178	521	0	73	0	2	523
520.00	mir-148b	Homo sapiens	0	15	0	15	158	488	158	416	16	17	520
518.00	mir-532	Homo sapiens	356	501	356	501	1	11	1	11	5	6	518
511.00	mir-101-2	Homo sapiens	0	0	0	0	107	496	0	53	12	15	511
500.00	mir-23b	Homo sapiens	1	34	1	34	0	89	0	89	179	377	500
493.00	mir-125b-1	Homo sapiens	48	407	0	0	4	23	4	23	58	63	493
483.00	mir-125b-2	Homo sapiens	48	405	0	0	0	19	0	19	58	59	483
477.00	mir-125a	Homo sapiens	10	364	10	364	0	8	0	8	92	105	477
460.00	mir-101-1	Homo sapiens	0	0	0	0	107	444	0	0	13	16	460
455.00	mir-128-2	Homo sapiens	0	0	0	0	178	454	0	3	0	1	455
406.00	mir-2110	Homo sapiens	62	356	62	356	0	0	0	0	18	50	406
405.00	mir-190b	Homo sapiens	253	402	253	402	0	0	0	0	3	3	405
400.00	mir-224	Homo sapiens	0	276	0	276	0	0	0	0	113	124	400
399.00	mir-1246	Homo sapiens	37	397	37	397	0	0	0	0	0	2	399
396.00	mir-340	Homo sapiens	133	325	133	325	9	63	9	63	5	8	396
387.00	let-7d	Homo sapiens	0	348	0	338	0	13	0	13	20	26	387
386.00	mir-3960	Homo sapiens	0	0	0	0	0	8	0	8	0	378	386
376.00	mir-181b-1	Homo sapiens	14	88	0	0	0	0	0	0	263	288	376
375.00	mir-152	Homo sapiens	0	0	0	0	85	370	85	369	0	5	375
372.00	mir-181b-2	Homo sapiens	15	89	0	2	0	1	0	1	261	282	372
362.00	mir-449b	Homo sapiens	16	339	16	313	2	8	2	8	2	15	362
360.00	mir-192	Homo sapiens	43	272	43	270	0	0	0	0	63	88	360
297.00	mir-24-2	Homo sapiens	0	106	0	106	0	158	0	0	30	33	297
296.00	mir-342	Homo sapiens	61	241	61	241	5	47	5	47	5	8	296
291.00	mir-218-2	Homo sapiens	160	289	0	0	0	0	0	0	2	2	291
287.00	mir-218-1	Homo sapiens	159	285	0	0	0	0	0	0	2	2	287
264.00	mir-92a-1	Homo sapiens	4	4	4	4	116	254	0	25	4	6	264
264.00	mir-363	Homo sapiens	0	0	0	0	189	264	189	264	0	0	264
259.00	mir-98	Homo sapiens	62	133	62	131	0	1	0	1	107	125	259
235.00	mir-92a-2	Homo sapiens	0	0	0	0	116	233	0	1	2	2	235
228.00	mir-3184	Homo sapiens	0	45	0	45	0	0	0	0	166	183	228
222.00	mir-16-2	Homo sapiens	18	110	0	0	8	88	8	88	23	24	222
221.00	mir-24-1	Homo sapiens	0	56	0	56	0	160	0	2	5	5	221
218.00	mir-8072	Homo sapiens	0	0	0	0	0	0	0	0	0	218	218
200.00	mir-23a	Homo sapiens	0	5	0	5	0	194	0	194	1	1	200
192.00	mir-744	Homo sapiens	28	188	28	188	0	4	0	4	0	0	192
177.00	mir-499a	Homo sapiens	23	177	23	177	0	0	0	0	0	0	177
177.00	mir-345	Homo sapiens	43	166	43	166	0	0	0	0	9	11	177
173.00	mir-9-3	Homo sapiens	4	61	0	0	1	3	0	0	102	109	173
170.00	mir-9-1	Homo sapiens	3	59	0	0	1	3	0	0	101	108	170
168.00	mir-135b	Homo sapiens	129	164	129	164	1	1	1	1	3	3	168
168.00	mir-1843	Homo sapiens	4	162	4	162	0	0	0	0	1	6	168
168.00	mir-9-2	Homo sapiens	3	59	0	0	1	4	0	0	101	105	168
164.00	mir-155	Homo sapiens	1	129	1	129	0	0	0	0	33	35	164
147.00	mir-29b-2	Homo sapiens	0	1	0	1	2	91	0	0	50	55	147
145.00	mir-150	Homo sapiens	111	138	111	138	0	7	0	7	0	0	145
145.00	mir-184	Homo sapiens	0	0	0	0	95	129	95	129	16	16	145
144.00	mir-29b-1	Homo sapiens	0	0	0	0	1	86	0	0	49	58	144
137.00	mir-132	Homo sapiens	5	41	5	41	5	39	5	39	54	57	137
135.00	mir-106b	Homo sapiens	4	37	4	37	14	78	14	78	20	20	135
133.00	mir-708	Homo sapiens	1	9	1	9	0	106	0	106	12	18	133
132.00	mir-425	Homo sapiens	3	99	3	99	0	4	0	4	25	29	132
125.00	mir-30c-2	Homo sapiens	31	71	0	1	0	5	0	5	44	49	125
118.00	mir-16-1	Homo sapiens	18	112	0	0	0	0	0	0	6	6	118
116.00	mir-30c-1	Homo sapiens	32	68	0	0	1	1	1	1	44	47	116
116.00	mir-501	Homo sapiens	0	2	0	2	5	114	5	113	0	0	116
114.00	mir-32	Homo sapiens	63	104	63	104	0	10	0	10	0	0	114
111.00	mir-451a	Homo sapiens	0	111	0	111	0	0	0	0	0	0	111
111.00	mir-223	Homo sapiens	0	11	0	11	26	90	26	90	9	10	111
107.00	mir-3615	Homo sapiens	0	0	0	0	0	106	0	106	0	1	107
106.00	mir-339	Homo sapiens	12	28	12	28	3	60	3	60	16	18	106
102.00	mir-6510	Homo sapiens	0	0	0	0	27	102	27	102	0	0	102
100.00	mir-574	Homo sapiens	0	0	0	0	47	59	47	59	24	41	100
91.00	mir-143	Homo sapiens	0	0	0	0	69	91	69	91	0	0	91
89.00	mir-374a	Homo sapiens	5	76	5	75	0	3	0	3	10	10	89
87.00	let-7e	Homo sapiens	3	80	3	76	0	2	0	2	4	5	87
85.00	mir-30b	Homo sapiens	20	82	20	82	0	1	0	1	2	2	85
81.00	mir-103b-2	Homo sapiens	16	68	0	0	0	0	0	0	11	13	81
81.00	mir-628	Homo sapiens	7	46	7	46	9	32	9	32	2	3	81
80.00	mir-769	Homo sapiens	36	79	36	79	0	0	0	0	0	1	80
80.00	mir-330	Homo sapiens	0	66	0	66	0	14	0	14	0	0	80
80.00	mir-103b-1	Homo sapiens	15	65	0	0	0	0	0	0	10	15	80
79.00	mir-149	Homo sapiens	2	51	2	51	0	0	0	0	25	28	79
78.00	mir-96	Homo sapiens	11	75	11	75	0	0	0	0	3	3	78
67.00	mir-95	Homo sapiens	0	0	0	0	6	67	6	67	0	0	67
62.00	mir-29c	Homo sapiens	0	22	0	22	2	29	2	25	11	11	62
57.00	mir-7-1	Homo sapiens	23	34	0	0	0	2	0	2	20	21	57
56.00	mir-7-3	Homo sapiens	24	35	0	0	0	0	0	0	19	21	56
56.00	mir-181d	Homo sapiens	13	29	13	29	0	0	0	0	25	27	56
55.00	mir-511	Homo sapiens	31	55	31	55	0	0	0	0	0	0	55
55.00	mir-7-2	Homo sapiens	23	33	0	0	0	0	0	0	20	22	55
53.00	mir-484	Homo sapiens	10	53	10	53	0	0	0	0	0	0	53
52.00	mir-642b	Homo sapiens	32	52	32	51	0	0	0	0	0	0	52
46.00	mir-1285-1	Homo sapiens	0	0	0	0	0	6	0	0	6	40	46
45.00	mir-652	Homo sapiens	0	0	0	0	19	45	19	45	0	0	45
44.00	mir-378i	Homo sapiens	0	44	0	44	0	0	0	0	0	0	44
44.00	mir-660	Homo sapiens	13	43	13	43	0	1	0	1	0	0	44
44.00	mir-210	Homo sapiens	1	1	1	1	4	36	4	36	2	7	44
42.00	mir-194-1	Homo sapiens	1	42	0	0	0	0	0	0	0	0	42
42.00	mir-194-2	Homo sapiens	0	42	0	0	0	0	0	0	0	0	42
41.00	mir-629	Homo sapiens	29	41	29	41	0	0	0	0	0	0	41
41.00	mir-651	Homo sapiens	6	37	6	37	0	0	0	0	4	4	41
41.00	mir-509-3	Homo sapiens	16	35	16	35	0	1	0	0	5	5	41
41.00	mir-126	Homo sapiens	0	0	0	0	3	39	3	39	2	2	41
41.00	mir-1290	Homo sapiens	0	0	0	0	0	41	0	41	0	0	41
41.00	mir-7706	Homo sapiens	0	0	0	0	2	38	2	38	3	3	41
41.00	mir-8086	Homo sapiens	0	0	0	0	0	0	0	0	4	41	41
40.00	mir-374b	Homo sapiens	4	40	4	40	0	0	0	0	0	0	40
40.00	mir-1287	Homo sapiens	6	38	6	38	0	0	0	0	2	2	40
37.00	mir-3135b	Homo sapiens	0	30	0	30	0	0	0	0	0	7	37
37.00	mir-452	Homo sapiens	6	10	6	10	0	0	0	0	23	27	37
36.00	mir-1301	Homo sapiens	0	0	0	0	0	15	0	15	18	21	36
35.00	mir-147b	Homo sapiens	0	1	0	1	0	34	0	34	0	0	35
34.00	mir-502	Homo sapiens	0	0	0	0	5	34	5	33	0	0	34
34.00	mir-582	Homo sapiens	0	0	0	0	30	32	30	32	2	2	34
34.00	mir-320b-2	Homo sapiens	0	0	0	0	0	33	0	0	0	1	34
33.00	mir-31	Homo sapiens	2	30	2	30	1	3	1	3	0	0	33
33.00	mir-320b-1	Homo sapiens	0	0	0	0	0	33	0	0	0	0	33
33.00	mir-941-4	Homo sapiens	0	0	0	0	9	32	0	0	1	1	33
32.00	mir-455	Homo sapiens	2	27	2	27	0	0	0	0	2	5	32
32.00	mir-335	Homo sapiens	0	8	0	8	5	22	5	22	2	2	32
32.00	mir-4446	Homo sapiens	0	0	0	0	6	25	6	25	6	7	32
31.00	mir-20a	Homo sapiens	27	31	27	31	0	0	0	0	0	0	31
30.00	mir-941-3	Homo sapiens	0	0	0	0	8	29	0	0	1	1	30
29.00	mir-185	Homo sapiens	0	26	0	26	0	3	0	3	0	0	29
29.00	mir-941-1	Homo sapiens	0	0	0	0	9	28	0	0	1	1	29
29.00	mir-3159	Homo sapiens	0	0	0	0	0	0	0	0	3	29	29
28.00	mir-193a	Homo sapiens	11	26	11	26	0	0	0	0	2	2	28
28.00	mir-941-2	Homo sapiens	0	0	0	0	8	27	0	0	1	1	28
28.00	mir-941-5	Homo sapiens	0	0	0	0	8	27	0	0	1	1	28
27.00	mir-10399	Homo sapiens	2	2	2	2	0	12	0	12	12	13	27
27.00	mir-760	Homo sapiens	0	0	0	0	5	27	5	27	0	0	27
26.00	mir-328	Homo sapiens	0	0	0	0	11	24	11	24	2	2	26
26.00	mir-874	Homo sapiens	0	0	0	0	10	26	10	26	0	0	26
25.00	mir-34a	Homo sapiens	5	18	5	18	0	0	0	0	3	7	25
25.00	mir-598	Homo sapiens	0	0	0	0	1	19	1	19	3	6	25
25.00	mir-421	Homo sapiens	0	0	0	0	1	24	1	24	0	1	25
23.00	mir-3613	Homo sapiens	8	17	8	17	0	0	0	0	4	6	23
22.00	mir-589	Homo sapiens	0	22	0	22	0	0	0	0	0	0	22
22.00	mir-625	Homo sapiens	0	18	0	18	0	4	0	4	0	0	22
22.00	mir-3529	Homo sapiens	0	0	0	0	0	0	0	0	19	22	22
21.00	mir-486-1	Homo sapiens	1	21	0	3	0	0	0	0	0	0	21
21.00	mir-934	Homo sapiens	1	21	1	21	0	0	0	0	0	0	21
20.00	mir-619	Homo sapiens	0	10	0	10	0	0	0	0	0	10	20
20.00	mir-15b	Homo sapiens	0	1	0	1	4	16	4	16	3	3	20
20.00	mir-514a-1	Homo sapiens	0	0	0	0	18	20	0	0	0	0	20
19.00	mir-324	Homo sapiens	3	8	3	8	0	1	0	1	1	10	19
19.00	mir-514a-3	Homo sapiens	0	0	0	0	18	19	0	0	0	0	19
19.00	mir-1299	Homo sapiens	0	0	0	0	0	17	0	17	2	2	19
18.00	mir-556	Homo sapiens	0	18	0	18	0	0	0	0	0	0	18
18.00	mir-486-2	Homo sapiens	0	18	0	0	0	0	0	0	0	0	18
18.00	mir-181c	Homo sapiens	3	9	3	9	0	5	0	5	3	4	18
18.00	mir-514a-2	Homo sapiens	0	0	0	0	17	18	0	0	0	0	18
18.00	mir-7851	Homo sapiens	0	0	0	0	0	0	0	0	0	18	18
17.00	mir-199b	Homo sapiens	1	6	1	6	0	9	0	0	2	2	17
17.00	mir-671	Homo sapiens	0	2	0	2	5	15	5	15	0	0	17
17.00	mir-107	Homo sapiens	0	0	0	0	0	3	0	3	10	14	17
16.00	mir-9985	Homo sapiens	0	16	0	16	0	0	0	0	0	0	16
15.00	mir-3158-1	Homo sapiens	0	14	0	0	0	1	0	0	0	0	15
15.00	mir-331	Homo sapiens	0	12	0	12	0	3	0	3	0	0	15
14.00	mir-19a	Homo sapiens	0	0	0	0	0	14	0	14	0	0	14
14.00	mir-103a-2	Homo sapiens	0	0	0	0	0	0	0	0	10	14	14
14.00	mir-203a	Homo sapiens	0	0	0	0	0	12	0	12	1	2	14
14.00	mir-1303	Homo sapiens	0	0	0	0	2	12	2	12	1	2	14
13.00	mir-3158-2	Homo sapiens	0	13	0	0	0	0	0	0	0	0	13
13.00	mir-103a-1	Homo sapiens	0	0	0	0	0	0	0	0	9	13	13
13.00	mir-3648-1	Homo sapiens	0	0	0	0	0	0	0	0	12	13	13
13.00	mir-5684	Homo sapiens	0	0	0	0	0	0	0	0	0	13	13
12.00	mir-505	Homo sapiens	2	9	2	9	1	3	1	3	0	0	12
12.00	mir-6503	Homo sapiens	2	4	2	4	0	7	0	7	1	1	12
12.00	mir-1269a	Homo sapiens	0	0	0	0	0	12	0	12	0	0	12
11.00	mir-659	Homo sapiens	4	11	4	11	0	0	0	0	0	0	11
11.00	mir-10a	Homo sapiens	1	8	1	8	0	0	0	0	3	3	11
11.00	mir-193b	Homo sapiens	0	6	0	6	3	5	3	5	0	0	11
11.00	mir-4677	Homo sapiens	0	5	0	5	0	6	0	6	0	0	11
11.00	mir-1306	Homo sapiens	0	2	0	2	0	1	0	1	3	8	11
11.00	mir-6868	Homo sapiens	0	0	0	0	0	11	0	11	0	0	11
10.00	mir-378d-2	Homo sapiens	1	10	1	10	0	0	0	0	0	0	10
10.00	mir-17	Homo sapiens	0	9	0	9	0	1	0	1	0	0	10
10.00	mir-4423	Homo sapiens	1	9	1	9	0	1	0	1	0	0	10
10.00	mir-204	Homo sapiens	2	8	2	8	0	1	0	1	1	1	10
10.00	mir-1295b	Homo sapiens	1	8	1	8	0	1	0	1	0	1	10
10.00	mir-877	Homo sapiens	4	5	4	5	0	0	0	0	0	5	10
10.00	mir-1268a	Homo sapiens	0	1	0	1	0	0	0	0	0	9	10
10.00	mir-1292	Homo sapiens	0	1	0	1	0	0	0	0	7	9	10
10.00	mir-19b-1	Homo sapiens	0	0	0	0	1	9	0	0	1	1	10
10.00	mir-1285-2	Homo sapiens	0	0	0	0	1	7	0	0	2	3	10
10.00	mir-3665	Homo sapiens	0	0	0	0	0	0	0	0	0	10	10
10.00	mir-4430	Homo sapiens	0	0	0	0	0	0	0	0	0	10	10
9.00	mir-3150a	Homo sapiens	0	9	0	9	0	0	0	0	0	0	9
9.00	mir-3913-1	Homo sapiens	0	9	0	0	0	0	0	0	0	0	9
9.00	mir-3913-2	Homo sapiens	0	9	0	0	0	0	0	0	0	0	9
9.00	mir-4662a	Homo sapiens	0	9	0	9	0	0	0	0	0	0	9
9.00	mir-942	Homo sapiens	3	8	3	8	1	1	1	1	0	0	9
9.00	mir-504	Homo sapiens	0	5	0	5	0	0	0	0	2	4	9
9.00	mir-500a	Homo sapiens	0	3	0	3	4	6	4	6	0	0	9
9.00	mir-676	Homo sapiens	0	1	0	1	5	8	5	8	0	0	9
9.00	mir-187	Homo sapiens	0	0	0	0	0	7	0	7	2	2	9
8.00	mir-548b	Homo sapiens	1	6	1	6	0	0	0	0	2	2	8
8.00	mir-19b-2	Homo sapiens	0	0	0	0	1	7	0	0	1	1	8
8.00	mir-508	Homo sapiens	0	0	0	0	0	3	0	3	5	5	8
8.00	mir-320c-1	Homo sapiens	0	0	0	0	1	8	0	0	0	0	8
8.00	mir-1277	Homo sapiens	0	0	0	0	0	1	0	1	7	7	8
8.00	mir-1273h	Homo sapiens	0	0	0	0	2	3	2	3	1	5	8
7.00	mir-7705	Homo sapiens	3	4	3	4	0	0	0	0	2	3	7
7.00	mir-1262	Homo sapiens	0	3	0	3	0	0	0	0	4	4	7
7.00	mir-3605	Homo sapiens	1	3	1	3	0	4	0	4	0	0	7
7.00	mir-130a	Homo sapiens	0	0	0	0	0	7	0	7	0	0	7
7.00	mir-1295a	Homo sapiens	0	0	0	0	4	7	4	7	0	0	7
7.00	mir-320c-2	Homo sapiens	0	0	0	0	1	7	0	0	0	0	7
7.00	mir-2276	Homo sapiens	0	0	0	0	2	7	2	7	0	0	7
7.00	mir-3929	Homo sapiens	0	0	0	0	0	0	0	0	0	7	7
7.00	mir-378f	Homo sapiens	0	0	0	0	0	5	0	5	0	2	7
7.00	mir-4472-2	Homo sapiens	0	0	0	0	0	0	0	0	1	7	7
7.00	mir-3648-2	Homo sapiens	0	0	0	0	0	0	0	0	6	7	7
6.00	mir-6516	Homo sapiens	1	5	1	5	0	0	0	0	1	1	6
6.00	mir-4286	Homo sapiens	0	3	0	3	0	0	0	0	0	3	6
6.00	mir-3614	Homo sapiens	0	3	0	3	0	0	0	0	3	3	6
6.00	mir-378c	Homo sapiens	0	2	0	2	0	0	0	0	4	4	6
6.00	mir-199a-1	Homo sapiens	0	1	0	0	0	5	0	0	0	0	6
6.00	mir-5089	Homo sapiens	1	1	1	1	0	5	0	5	0	0	6
6.00	mir-12136	Homo sapiens	0	1	0	1	0	0	0	0	5	5	6
6.00	mir-199a-2	Homo sapiens	0	0	0	0	0	5	0	0	1	1	6
6.00	mir-296	Homo sapiens	0	0	0	0	0	5	0	5	0	1	6
6.00	mir-1273c	Homo sapiens	0	0	0	0	0	0	0	0	0	6	6
6.00	mir-4452	Homo sapiens	0	0	0	0	0	0	0	0	0	6	6
6.00	mir-6842	Homo sapiens	0	0	0	0	2	6	2	6	0	0	6
5.00	mir-33a	Homo sapiens	0	5	0	5	0	0	0	0	0	0	5
5.00	mir-1266	Homo sapiens	4	5	4	5	0	0	0	0	0	0	5
5.00	mir-338	Homo sapiens	0	4	0	4	0	1	0	1	0	0	5
5.00	mir-4326	Homo sapiens	0	4	0	4	0	0	0	0	1	1	5
5.00	mir-3065	Homo sapiens	1	3	1	3	0	1	0	1	1	1	5
5.00	mir-18a	Homo sapiens	1	2	1	2	2	3	2	3	0	0	5
5.00	mir-130b	Homo sapiens	0	1	0	1	0	4	0	4	0	0	5
5.00	mir-506	Homo sapiens	0	0	0	0	0	5	0	5	0	0	5
5.00	mir-576	Homo sapiens	0	0	0	0	1	4	1	4	1	1	5
5.00	mir-663b	Homo sapiens	0	0	0	0	0	1	0	1	2	4	5
4.00	mir-211	Homo sapiens	1	4	1	4	0	0	0	0	0	0	4
4.00	mir-561	Homo sapiens	2	4	2	4	0	0	0	0	0	0	4
4.00	mir-592	Homo sapiens	0	4	0	4	0	0	0	0	0	0	4
4.00	mir-548k	Homo sapiens	0	4	0	4	0	0	0	0	0	0	4
4.00	mir-548i-4	Homo sapiens	1	4	0	0	0	0	0	0	0	0	4
4.00	mir-3616	Homo sapiens	0	4	0	4	0	0	0	0	0	0	4
4.00	mir-548az	Homo sapiens	0	4	0	4	0	0	0	0	0	0	4
4.00	mir-195	Homo sapiens	1	3	1	3	0	1	0	1	0	0	4
4.00	mir-362	Homo sapiens	0	3	0	3	0	0	0	0	1	1	4
4.00	mir-212	Homo sapiens	1	1	1	1	0	2	0	2	0	1	4
4.00	mir-3135a	Homo sapiens	0	0	0	0	0	0	0	0	0	4	4
4.00	mir-1268b	Homo sapiens	0	0	0	0	0	0	0	0	0	4	4
4.00	mir-4512	Homo sapiens	0	0	0	0	0	0	0	0	0	4	4
4.00	mir-4529	Homo sapiens	0	0	0	0	0	0	0	0	3	4	4
4.00	mir-7110	Homo sapiens	0	0	0	0	0	0	0	0	0	4	4
3.00	mir-15a	Homo sapiens	0	3	0	3	0	0	0	0	0	0	3
3.00	mir-215	Homo sapiens	0	3	0	3	0	0	0	0	0	0	3
3.00	mir-365a	Homo sapiens	0	3	0	3	0	0	0	0	0	0	3
3.00	mir-422a	Homo sapiens	0	3	0	3	0	0	0	0	0	0	3
3.00	mir-642a	Homo sapiens	2	3	2	3	0	0	0	0	0	0	3
3.00	mir-766	Homo sapiens	0	3	0	3	0	0	0	0	0	0	3
3.00	mir-3622a	Homo sapiens	0	3	0	3	0	0	0	0	0	0	3
3.00	mir-3180-5	Homo sapiens	0	3	0	0	0	0	0	0	0	0	3
3.00	mir-4652	Homo sapiens	0	3	0	3	0	0	0	0	0	0	3
3.00	mir-6805	Homo sapiens	1	3	1	3	0	0	0	0	0	0	3
3.00	mir-4516	Homo sapiens	0	2	0	2	0	0	0	0	0	1	3
3.00	mir-4639	Homo sapiens	0	2	0	2	0	1	0	1	0	0	3
3.00	mir-5696	Homo sapiens	0	2	0	2	0	0	0	0	0	1	3
3.00	mir-2277	Homo sapiens	0	1	0	1	0	2	0	2	0	0	3
3.00	mir-197	Homo sapiens	0	0	0	0	1	3	1	3	0	0	3
3.00	mir-1-1	Homo sapiens	0	0	0	0	1	2	0	0	1	1	3
3.00	mir-549a	Homo sapiens	0	0	0	0	3	3	3	3	0	0	3
3.00	mir-944	Homo sapiens	0	0	0	0	0	3	0	3	0	0	3
3.00	mir-1289-1	Homo sapiens	0	0	0	0	0	0	0	0	3	3	3
3.00	mir-1248	Homo sapiens	0	0	0	0	0	0	0	0	3	3	3
3.00	mir-548o	Homo sapiens	0	0	0	0	3	3	0	0	0	0	3
3.00	mir-1288	Homo sapiens	0	0	0	0	2	3	2	3	0	0	3
3.00	mir-3909	Homo sapiens	0	0	0	0	0	1	0	1	2	2	3
3.00	mir-548o-2	Homo sapiens	0	0	0	0	3	3	0	0	0	0	3
3.00	mir-548ah	Homo sapiens	0	0	0	0	2	3	2	3	0	0	3
3.00	mir-3064	Homo sapiens	0	0	0	0	0	0	0	0	3	3	3
3.00	mir-6747	Homo sapiens	0	0	0	0	1	3	1	3	0	0	3
3.00	mir-6808	Homo sapiens	0	0	0	0	2	3	2	3	0	0	3
3.00	mir-9903	Homo sapiens	0	0	0	0	1	3	1	3	0	0	3
3.00	mir-10395	Homo sapiens	0	0	0	0	0	3	0	3	0	0	3
2.00	mir-139	Homo sapiens	2	2	2	2	0	0	0	0	0	0	2
2.00	mir-129-2	Homo sapiens	2	2	0	0	0	0	0	0	0	0	2
2.00	mir-579	Homo sapiens	0	2	0	2	0	0	0	0	0	0	2
2.00	mir-618	Homo sapiens	2	2	2	2	0	0	0	0	0	0	2
2.00	mir-1271	Homo sapiens	0	2	0	2	0	0	0	0	0	0	2
2.00	mir-1294	Homo sapiens	0	2	0	2	0	0	0	0	0	0	2
2.00	mir-548i-1	Homo sapiens	1	2	0	0	0	0	0	0	0	0	2
2.00	mir-548i-2	Homo sapiens	1	2	0	0	0	0	0	0	0	0	2
2.00	mir-548i-3	Homo sapiens	1	2	0	0	0	0	0	0	0	0	2
2.00	mir-3180-4	Homo sapiens	0	2	0	0	0	0	0	0	0	0	2
2.00	mir-4661	Homo sapiens	1	2	1	2	0	0	0	0	0	0	2
2.00	mir-4776-1	Homo sapiens	1	2	0	0	0	0	0	0	0	0	2
2.00	mir-6499	Homo sapiens	1	2	1	2	0	0	0	0	0	0	2
2.00	mir-6501	Homo sapiens	0	2	0	2	0	0	0	0	0	0	2
2.00	mir-6502	Homo sapiens	2	2	2	2	0	0	0	0	0	0	2
2.00	mir-6764	Homo sapiens	2	2	2	2	0	0	0	0	0	0	2
2.00	mir-6807	Homo sapiens	0	2	0	2	0	0	0	0	0	0	2
2.00	mir-6819	Homo sapiens	0	2	0	2	0	0	0	0	0	0	2
2.00	mir-6822	Homo sapiens	0	2	0	2	0	0	0	0	0	0	2
2.00	mir-1-2	Homo sapiens	0	0	0	0	2	2	0	0	0	0	2
2.00	mir-370	Homo sapiens	0	0	0	0	1	2	1	2	0	0	2
2.00	mir-381	Homo sapiens	0	0	0	0	2	2	2	2	0	0	2
2.00	mir-503	Homo sapiens	0	0	0	0	0	0	0	0	2	2	2
2.00	mir-597	Homo sapiens	0	0	0	0	0	0	0	0	2	2	2
2.00	mir-33b	Homo sapiens	0	0	0	0	0	2	0	2	0	0	2
2.00	mir-641	Homo sapiens	0	0	0	0	0	0	0	0	2	2	2
2.00	mir-542	Homo sapiens	0	0	0	0	0	2	0	2	0	0	2
2.00	mir-664a	Homo sapiens	0	0	0	0	0	2	0	2	0	0	2
2.00	mir-320d-1	Homo sapiens	0	0	0	0	1	2	0	0	0	0	2
2.00	mir-320d-2	Homo sapiens	0	0	0	0	1	2	0	1	0	0	2
2.00	mir-1910	Homo sapiens	0	0	0	0	1	2	1	2	0	0	2
2.00	mir-2114	Homo sapiens	0	0	0	0	0	2	0	2	0	0	2
2.00	mir-3177	Homo sapiens	0	0	0	0	0	2	0	2	0	0	2
2.00	mir-3679	Homo sapiens	0	0	0	0	0	0	0	0	1	2	2
2.00	mir-3912	Homo sapiens	0	0	0	0	1	2	1	2	0	0	2
2.00	mir-4473	Homo sapiens	0	0	0	0	0	2	0	2	0	0	2
2.00	mir-4491	Homo sapiens	0	0	0	0	0	0	0	0	1	2	2
2.00	mir-4666a	Homo sapiens	0	0	0	0	0	0	0	0	2	2	2
2.00	mir-4713	Homo sapiens	0	0	0	0	0	2	0	2	0	0	2
2.00	mir-4728	Homo sapiens	0	0	0	0	0	0	0	0	2	2	2
2.00	mir-5585	Homo sapiens	0	0	0	0	0	2	0	2	0	0	2
2.00	mir-5699	Homo sapiens	0	0	0	0	0	0	0	0	2	2	2
2.00	mir-6818	Homo sapiens	0	0	0	0	0	0	0	0	2	2	2
2.00	mir-6843	Homo sapiens	0	0	0	0	0	2	0	2	0	0	2
2.00	mir-7854	Homo sapiens	0	0	0	0	1	2	1	2	0	0	2
2.00	mir-8485	Homo sapiens	0	0	0	0	0	2	0	2	0	0	2
2.00	mir-10396b	Homo sapiens	0	0	0	0	0	1	0	1	1	1	2
1.00	mir-106a	Homo sapiens	1	1	1	1	0	0	0	0	0	0	1
1.00	mir-129-1	Homo sapiens	1	1	0	0	0	0	0	0	0	0	1
1.00	mir-134	Homo sapiens	0	1	0	1	0	0	0	0	0	0	1
1.00	mir-188	Homo sapiens	1	1	1	1	0	0	0	0	0	0	1
1.00	mir-196b	Homo sapiens	1	1	1	1	0	0	0	0	0	0	1
1.00	mir-20b	Homo sapiens	1	1	1	1	0	0	0	0	0	0	1
1.00	mir-450a-1	Homo sapiens	0	1	0	0	0	0	0	0	0	0	1
1.00	mir-491	Homo sapiens	0	1	0	1	0	0	0	0	0	0	1
1.00	mir-581	Homo sapiens	0	1	0	1	0	0	0	0	0	0	1
1.00	mir-624	Homo sapiens	0	1	0	1	0	0	0	0	0	0	1
1.00	mir-548d-1	Homo sapiens	0	1	0	0	0	0	0	0	0	0	1
1.00	mir-548d-2	Homo sapiens	0	1	0	0	0	0	0	0	0	0	1
1.00	mir-454	Homo sapiens	0	1	0	1	0	0	0	0	0	0	1
1.00	mir-1298	Homo sapiens	1	1	1	1	0	0	0	0	0	0	1
1.00	mir-450b	Homo sapiens	0	1	0	1	0	0	0	0	0	0	1
1.00	mir-873	Homo sapiens	0	1	0	1	0	0	0	0	0	0	1
1.00	mir-1255b-1	Homo sapiens	0	1	0	0	0	0	0	0	0	0	1
1.00	mir-1908	Homo sapiens	0	1	0	1	0	0	0	0	0	0	1
1.00	mir-1911	Homo sapiens	0	1	0	1	0	0	0	0	0	0	1
1.00	mir-2278	Homo sapiens	0	1	0	1	0	0	0	0	0	0	1
1.00	mir-2681	Homo sapiens	0	1	0	1	0	0	0	0	0	0	1
1.00	mir-3125	Homo sapiens	0	1	0	1	0	0	0	0	0	0	1
1.00	mir-1260b	Homo sapiens	0	1	0	1	0	0	0	0	0	0	1
1.00	mir-3661	Homo sapiens	1	1	1	1	0	0	0	0	0	0	1
1.00	mir-3918	Homo sapiens	1	1	1	1	0	0	0	0	0	0	1
1.00	mir-3934	Homo sapiens	0	1	0	1	0	0	0	0	0	0	1
1.00	mir-4429	Homo sapiens	0	1	0	1	0	0	0	0	0	0	1
1.00	mir-548aj-2	Homo sapiens	0	1	0	0	0	0	0	0	0	0	1
1.00	mir-4466	Homo sapiens	0	1	0	1	0	0	0	0	0	0	1
1.00	mir-4467	Homo sapiens	0	1	0	1	0	0	0	0	0	0	1
1.00	mir-4510	Homo sapiens	0	1	0	0	0	0	0	0	0	0	1
1.00	mir-4511	Homo sapiens	0	1	0	1	0	0	0	0	0	0	1
1.00	mir-4515	Homo sapiens	0	1	0	1	0	0	0	0	0	0	1
1.00	mir-4714	Homo sapiens	0	1	0	1	0	0	0	0	0	0	1
1.00	mir-4723	Homo sapiens	0	1	0	1	0	0	0	0	0	0	1
1.00	mir-4745	Homo sapiens	0	1	0	1	0	0	0	0	0	0	1
1.00	mir-4746	Homo sapiens	0	1	0	1	0	0	0	0	0	0	1
1.00	mir-4776-2	Homo sapiens	0	1	0	0	0	0	0	0	0	0	1
1.00	mir-4797	Homo sapiens	0	1	0	1	0	0	0	0	0	0	1
1.00	mir-4999	Homo sapiens	0	1	0	1	0	0	0	0	0	0	1
1.00	mir-5001	Homo sapiens	0	1	0	1	0	0	0	0	0	0	1
1.00	mir-5009	Homo sapiens	0	1	0	1	0	0	0	0	0	0	1
1.00	mir-5088	Homo sapiens	0	1	0	1	0	0	0	0	0	0	1
1.00	mir-6744	Homo sapiens	0	1	0	1	0	0	0	0	0	0	1
1.00	mir-6751	Homo sapiens	0	1	0	1	0	0	0	0	0	0	1
1.00	mir-6766	Homo sapiens	0	1	0	1	0	0	0	0	0	0	1
1.00	mir-10527	Homo sapiens	0	1	0	1	0	0	0	0	0	0	1
1.00	mir-93	Homo sapiens	0	0	0	0	0	1	0	1	0	0	1
1.00	mir-127	Homo sapiens	0	0	0	0	0	0	0	0	1	1	1
1.00	mir-382	Homo sapiens	0	0	0	0	0	1	0	1	0	0	1
1.00	mir-323a	Homo sapiens	0	0	0	0	0	1	0	1	0	0	1
1.00	mir-326	Homo sapiens	0	0	0	0	0	1	0	1	0	0	1
1.00	mir-590	Homo sapiens	0	0	0	0	0	1	0	1	0	0	1
1.00	mir-599	Homo sapiens	0	0	0	0	0	0	0	0	1	1	1
1.00	mir-616	Homo sapiens	0	0	0	0	0	1	0	1	0	0	1
1.00	mir-632	Homo sapiens	0	0	0	0	0	0	0	0	1	1	1
1.00	mir-643	Homo sapiens	0	0	0	0	0	0	0	0	1	1	1
1.00	mir-653	Homo sapiens	0	0	0	0	0	0	0	0	1	1	1
1.00	mir-151b	Homo sapiens	0	0	0	0	0	0	0	0	1	1	1
1.00	mir-509-2	Homo sapiens	0	0	0	0	0	1	0	0	0	0	1
1.00	mir-543	Homo sapiens	0	0	0	0	0	1	0	1	0	0	1
1.00	mir-940	Homo sapiens	0	0	0	0	0	1	0	1	0	0	1
1.00	mir-1181	Homo sapiens	0	0	0	0	0	0	0	0	0	1	1
1.00	mir-1291	Homo sapiens	0	0	0	0	0	0	0	0	1	1	1
1.00	mir-548f-2	Homo sapiens	0	0	0	0	0	1	0	0	0	0	1
1.00	mir-1255a	Homo sapiens	0	0	0	0	0	0	0	0	1	1	1
1.00	mir-1278	Homo sapiens	0	0	0	0	0	0	0	0	1	1	1
1.00	mir-1972-1	Homo sapiens	0	0	0	0	0	0	0	0	0	1	1
1.00	mir-2861	Homo sapiens	0	0	0	0	0	0	0	0	0	1	1
1.00	mir-3127	Homo sapiens	0	0	0	0	1	1	1	1	0	0	1
1.00	mir-3129	Homo sapiens	0	0	0	0	0	1	0	1	0	0	1
1.00	mir-3136	Homo sapiens	0	0	0	0	0	0	0	0	1	1	1
1.00	mir-3142	Homo sapiens	0	0	0	0	0	1	0	1	0	0	1
1.00	mir-548u	Homo sapiens	0	0	0	0	0	1	0	1	0	0	1
1.00	mir-548v	Homo sapiens	0	0	0	0	0	0	0	0	0	1	1
1.00	mir-3157	Homo sapiens	0	0	0	0	0	1	0	1	0	0	1
1.00	mir-3176	Homo sapiens	0	0	0	0	0	0	0	0	0	1	1
1.00	mir-3180-1	Homo sapiens	0	0	0	0	0	1	0	0	0	0	1
1.00	mir-3180-2	Homo sapiens	0	0	0	0	1	1	0	0	0	0	1
1.00	mir-3179-2	Homo sapiens	0	0	0	0	0	1	0	0	0	0	1
1.00	mir-3179-3	Homo sapiens	0	0	0	0	0	1	0	0	0	0	1
1.00	mir-3188	Homo sapiens	0	0	0	0	0	1	0	1	0	0	1
1.00	mir-3196	Homo sapiens	0	0	0	0	0	0	0	0	0	1	1
1.00	mir-2355	Homo sapiens	0	0	0	0	0	1	0	1	0	0	1
1.00	mir-3611	Homo sapiens	0	0	0	0	0	1	0	1	0	0	1
1.00	mir-23c	Homo sapiens	0	0	0	0	0	1	0	1	0	0	1
1.00	mir-3690-1	Homo sapiens	0	0	0	0	0	0	0	0	1	1	1
1.00	mir-3908	Homo sapiens	0	0	0	0	0	0	0	0	0	1	1
1.00	mir-3911	Homo sapiens	0	0	0	0	0	0	0	0	1	1	1
1.00	mir-4422	Homo sapiens	0	0	0	0	0	0	0	0	1	1	1
1.00	mir-4444-1	Homo sapiens	0	0	0	0	0	1	0	0	0	0	1
1.00	mir-4448	Homo sapiens	0	0	0	0	0	1	0	1	0	0	1
1.00	mir-548x-2	Homo sapiens	0	0	0	0	0	0	0	0	0	1	1
1.00	mir-4485	Homo sapiens	0	0	0	0	0	1	0	1	0	0	1
1.00	mir-4521	Homo sapiens	0	0	0	0	0	0	0	0	1	1	1
1.00	mir-4658	Homo sapiens	0	0	0	0	0	1	0	1	0	0	1
1.00	mir-4659b	Homo sapiens	0	0	0	0	0	1	0	1	0	0	1
1.00	mir-4664	Homo sapiens	0	0	0	0	0	1	0	1	0	0	1
1.00	mir-4781	Homo sapiens	0	0	0	0	0	0	0	0	1	1	1
1.00	mir-4796	Homo sapiens	0	0	0	0	0	1	0	1	0	0	1
1.00	mir-4444-2	Homo sapiens	0	0	0	0	0	1	0	0	0	0	1
1.00	mir-5689	Homo sapiens	0	0	0	0	0	0	0	0	0	1	1
1.00	mir-5695	Homo sapiens	0	0	0	0	0	1	0	1	0	0	1
1.00	mir-5708	Homo sapiens	0	0	0	0	0	0	0	0	0	1	1
1.00	mir-6125	Homo sapiens	0	0	0	0	0	0	0	0	0	1	1
1.00	mir-548ay	Homo sapiens	0	0	0	0	0	0	0	0	1	1	1
1.00	mir-6855	Homo sapiens	0	0	0	0	0	0	0	0	1	1	1
1.00	mir-6511a-2	Homo sapiens	0	0	0	0	0	0	0	0	0	1	1
1.00	mir-6511a-3	Homo sapiens	0	0	0	0	0	0	0	0	1	1	1
1.00	mir-6511a-4	Homo sapiens	0	0	0	0	0	0	0	0	1	1	1
1.00	mir-7155	Homo sapiens	0	0	0	0	0	1	0	1	0	0	1
1.00	mir-6770-3	Homo sapiens	0	0	0	0	0	1	0	0	0	0	1
1.00	mir-9902-1	Homo sapiens	0	0	0	0	0	0	0	0	0	1	1
1.00	mir-10396a	Homo sapiens	0	0	0	0	0	0	0	0	1	1	1
1.00	mir-9902-2	Homo sapiens	0	0	0	0	0	0	0	0	0	1	1
0.00	mir-450a-2	Homo sapiens	0	0	0	0	0	0	0	0	0	0	0
0.00	mir-509-1	Homo sapiens	0	0	0	0	0	0	0	0	0	0	0
0.00	mir-548f-3	Homo sapiens	0	0	0	0	0	0	0	0	0	0	0
0.00	mir-548g	Homo sapiens	0	0	0	0	0	0	0	0	0	0	0
0.00	mir-1255b-2	Homo sapiens	0	0	0	0	0	0	0	0	0	0	0
0.00	mir-548t	Homo sapiens	0	0	0	0	0	0	0	0	0	0	0
0.00	mir-3179-1	Homo sapiens	0	0	0	0	0	0	0	0	0	0	0
0.00	mir-3180-3	Homo sapiens	0	0	0	0	0	0	0	0	0	0	0
0.00	mir-3195	Homo sapiens	0	0	0	0	0	0	0	0	0	0	0
0.00	mir-548x	Homo sapiens	0	0	0	0	0	0	0	0	0	0	0
0.00	mir-1972-2	Homo sapiens	0	0	0	0	0	0	0	0	0	0	0
0.00	mir-548aa-1	Homo sapiens	0	0	0	0	0	0	0	0	0	0	0
0.00	mir-548aa-2	Homo sapiens	0	0	0	0	0	0	0	0	0	0	0
0.00	mir-548ad	Homo sapiens	0	0	0	0	0	0	0	0	0	0	0
0.00	mir-548ae-2	Homo sapiens	0	0	0	0	0	0	0	0	0	0	0
0.00	mir-6511a-1	Homo sapiens	0	0	0	0	0	0	0	0	0	0	0
0.00	mir-6511b-1	Homo sapiens	0	0	0	0	0	0	0	0	0	0	0
0.00	mir-6770-1	Homo sapiens	0	0	0	0	0	0	0	0	0	0	0
0.00	mir-6511b-2	Homo sapiens	0	0	0	0	0	0	0	0	0	0	0
0.00	mir-3690-2	Homo sapiens	0	0	0	0	0	0	0	0	0	0	0
0.00	mir-6770-2	Homo sapiens	0	0	0	0	0	0	0	0	0	0	0
0.00	mir-3179-4	Homo sapiens	0	0	0	0	0	0	0	0	0	0	0

## Sheet: G9
Expression values	Name	Resource	Exact mature 5'	Mature 5'	Unique exact mature 5'	Unique mature 5'	Exact mature 3'	Mature 3'	Unique exact mature 3'	Unique mature 3'	Exact other	Other	Total
11,802.00	mir-200a	Homo sapiens	259	424	259	424	3	11292	3	11280	83	86	11802
11,208.00	mir-21	Homo sapiens	2925	11037	2925	11037	0	0	0	0	160	171	11208
8,478.00	mir-148a	Homo sapiens	7	12	7	12	7485	8397	7485	8386	61	69	8478
8,353.00	mir-34c	Homo sapiens	194	7101	194	7100	38	77	38	77	1122	1175	8353
7,830.00	let-7b	Homo sapiens	2926	6845	2926	6835	0	1	0	1	928	984	7830
7,599.00	mir-99a	Homo sapiens	276	7557	276	7548	0	0	0	0	42	42	7599
7,217.00	let-7i	Homo sapiens	5775	6943	5775	6933	0	1	0	1	256	273	7217
6,264.00	mir-200b	Homo sapiens	45	111	45	111	312	6132	312	6127	11	21	6264
5,280.00	mir-200c	Homo sapiens	0	0	0	0	1427	5071	1427	5067	188	209	5280
2,691.00	mir-151a	Homo sapiens	10	17	10	17	1551	2647	1551	2647	20	27	2691
2,246.00	mir-27a	Homo sapiens	5	21	5	21	4	2223	4	2213	2	2	2246
2,006.00	mir-375	Homo sapiens	0	0	0	0	250	1721	250	1721	265	285	2006
1,930.00	let-7c	Homo sapiens	923	1770	923	1758	0	0	0	0	154	160	1930
1,890.00	mir-27b	Homo sapiens	0	1	0	1	66	1887	66	1879	0	2	1890
1,784.00	mir-26a-1	Homo sapiens	1466	1780	0	0	0	0	0	0	2	4	1784
1,776.00	mir-26a-2	Homo sapiens	1465	1771	0	0	0	0	0	0	5	5	1776
1,770.00	let-7g	Homo sapiens	548	1689	548	1676	0	0	0	0	74	81	1770
1,587.00	mir-30d	Homo sapiens	364	1480	364	1478	0	6	0	6	91	101	1587
1,332.00	let-7f-2	Homo sapiens	340	1294	0	80	0	0	0	0	35	38	1332
1,269.00	let-7f-1	Homo sapiens	340	1227	0	2	0	2	0	2	36	40	1269
1,191.00	mir-3074	Homo sapiens	0	1174	0	1174	0	17	0	17	0	0	1191
1,174.00	mir-423	Homo sapiens	193	940	193	940	26	100	26	100	120	134	1174
945.00	mir-146a	Homo sapiens	219	941	219	932	3	3	3	3	1	1	945
914.00	let-7a-3	Homo sapiens	146	833	0	4	0	8	0	0	57	73	914
906.00	let-7a-1	Homo sapiens	146	833	0	0	0	9	0	0	51	64	906
902.00	let-7a-2	Homo sapiens	146	836	0	0	0	0	0	0	51	66	902
854.00	mir-100	Homo sapiens	12	820	12	811	0	0	0	0	32	34	854
708.00	mir-146b	Homo sapiens	248	698	248	689	0	6	0	6	4	4	708
592.00	mir-92b	Homo sapiens	0	154	0	154	32	280	32	274	110	158	592
592.00	mir-29a	Homo sapiens	0	0	0	0	7	401	7	400	182	191	592
502.00	mir-320a	Homo sapiens	0	0	0	0	136	489	136	477	0	13	502
495.00	mir-429	Homo sapiens	0	0	0	0	165	486	165	486	9	9	495
470.00	mir-30a	Homo sapiens	107	356	107	355	11	71	11	58	36	43	470
465.00	mir-99b	Homo sapiens	151	435	151	435	9	16	9	16	14	14	465
465.00	mir-22	Homo sapiens	0	46	0	46	165	374	165	374	42	45	465
428.00	mir-1180	Homo sapiens	0	0	0	0	107	372	107	372	51	56	428
412.00	mir-203b	Homo sapiens	3	412	3	412	0	0	0	0	0	0	412
392.00	mir-2110	Homo sapiens	57	365	57	365	0	0	0	0	12	27	392
373.00	mir-142	Homo sapiens	6	18	6	18	11	67	11	67	256	288	373
333.00	mir-26b	Homo sapiens	142	333	142	333	0	0	0	0	0	0	333
312.00	mir-34b	Homo sapiens	0	7	0	5	1	302	1	302	3	3	312
306.00	mir-125a	Homo sapiens	5	226	5	226	0	13	0	13	59	67	306
296.00	mir-141	Homo sapiens	4	8	4	8	0	250	0	235	35	38	296
292.00	mir-191	Homo sapiens	130	280	130	280	0	0	0	0	8	12	292
277.00	mir-25	Homo sapiens	0	3	0	3	151	271	151	271	3	3	277
267.00	mir-205	Homo sapiens	58	262	58	262	0	0	0	0	5	5	267
260.00	mir-342	Homo sapiens	39	231	39	231	4	17	4	17	6	12	260
260.00	mir-222	Homo sapiens	0	0	0	0	137	247	137	247	8	13	260
242.00	mir-186	Homo sapiens	38	241	38	241	0	0	0	0	1	1	242
234.00	mir-150	Homo sapiens	173	228	173	228	0	2	0	2	4	4	234
222.00	mir-125b-2	Homo sapiens	10	176	0	1	2	10	2	10	36	36	222
221.00	mir-125b-1	Homo sapiens	10	177	0	0	0	4	0	4	36	40	221
212.00	mir-140	Homo sapiens	7	15	7	15	17	180	17	180	3	17	212
207.00	mir-183	Homo sapiens	105	207	105	207	0	0	0	0	0	0	207
204.00	mir-30e	Homo sapiens	18	89	18	89	15	76	15	64	29	39	204
196.00	mir-361	Homo sapiens	0	2	0	2	7	176	7	176	17	18	196
192.00	mir-182	Homo sapiens	15	160	15	160	0	2	0	2	29	30	192
190.00	mir-449c	Homo sapiens	18	190	18	190	0	0	0	0	0	0	190
187.00	mir-181a-2	Homo sapiens	4	113	0	0	0	2	0	2	67	72	187
185.00	mir-181a-1	Homo sapiens	4	114	0	0	0	0	0	0	66	71	185
166.00	mir-190b	Homo sapiens	51	165	51	165	0	0	0	0	1	1	166
158.00	mir-101-2	Homo sapiens	0	0	0	0	37	157	0	12	0	1	158
152.00	mir-155	Homo sapiens	0	130	0	130	0	0	0	0	21	22	152
151.00	mir-28	Homo sapiens	0	22	0	22	38	122	38	122	7	7	151
151.00	mir-148b	Homo sapiens	0	3	0	3	46	142	46	132	6	6	151
149.00	mir-128-1	Homo sapiens	0	0	0	0	49	149	0	24	0	0	149
147.00	mir-3184	Homo sapiens	0	12	0	12	0	0	0	0	121	135	147
146.00	mir-378a	Homo sapiens	0	0	0	0	1	146	1	146	0	0	146
145.00	mir-10400	Homo sapiens	0	145	0	145	0	0	0	0	0	0	145
145.00	let-7d	Homo sapiens	0	131	0	128	0	2	0	2	12	12	145
145.00	mir-101-1	Homo sapiens	0	0	0	0	36	142	0	0	0	3	145
135.00	mir-449a	Homo sapiens	81	127	81	126	0	0	0	0	7	8	135
134.00	mir-224	Homo sapiens	0	78	0	78	0	0	0	0	52	56	134
126.00	mir-128-2	Homo sapiens	0	0	0	0	49	126	0	1	0	0	126
118.00	mir-92a-1	Homo sapiens	0	0	0	0	28	116	0	14	0	2	118
115.00	mir-221	Homo sapiens	0	17	0	17	1	62	1	62	30	36	115
102.00	mir-532	Homo sapiens	73	101	73	101	0	1	0	1	0	0	102
94.00	mir-92a-2	Homo sapiens	0	0	0	0	28	94	0	0	0	0	94
85.00	mir-744	Homo sapiens	10	74	10	74	0	0	0	0	3	11	85
83.00	mir-192	Homo sapiens	7	52	7	52	0	0	0	0	22	31	83
81.00	mir-451a	Homo sapiens	0	81	0	81	0	0	0	0	0	0	81
78.00	let-7e	Homo sapiens	8	73	8	70	0	0	0	0	5	5	78
78.00	mir-363	Homo sapiens	0	0	0	0	49	78	49	78	0	0	78
77.00	mir-340	Homo sapiens	31	67	31	67	5	10	5	10	0	0	77
67.00	mir-7-2	Homo sapiens	40	53	0	0	0	0	0	0	13	14	67
64.00	mir-7-1	Homo sapiens	39	51	0	0	0	0	0	0	13	13	64
63.00	mir-7-3	Homo sapiens	39	50	0	0	0	0	0	0	13	13	63
63.00	mir-181b-1	Homo sapiens	7	22	0	0	0	0	0	0	35	41	63
62.00	mir-152	Homo sapiens	0	0	0	0	4	62	4	62	0	0	62
60.00	mir-24-2	Homo sapiens	1	28	1	28	0	24	0	0	8	8	60
59.00	mir-16-2	Homo sapiens	6	29	0	0	2	19	2	19	10	11	59
57.00	mir-181b-2	Homo sapiens	6	19	0	0	0	0	0	0	35	38	57
56.00	mir-1843	Homo sapiens	1	55	1	55	0	0	0	0	0	1	56
55.00	mir-1246	Homo sapiens	2	55	2	55	0	0	0	0	0	0	55
55.00	mir-3960	Homo sapiens	0	0	0	0	0	2	0	2	0	53	55
53.00	mir-1307	Homo sapiens	5	5	5	5	0	48	0	48	0	0	53
51.00	mir-106b	Homo sapiens	0	3	0	3	0	30	0	30	18	18	51
46.00	mir-10a	Homo sapiens	3	43	3	43	0	0	0	0	3	3	46
45.00	mir-98	Homo sapiens	15	38	15	38	0	0	0	0	4	7	45
44.00	mir-8072	Homo sapiens	0	0	0	0	0	0	0	0	0	44	44
43.00	mir-4446	Homo sapiens	0	0	0	0	15	40	15	40	3	3	43
42.00	mir-425	Homo sapiens	1	34	1	34	0	0	0	0	7	8	42
41.00	mir-103b-1	Homo sapiens	11	39	0	0	0	0	0	0	2	2	41
40.00	mir-184	Homo sapiens	0	0	0	0	29	40	29	40	0	0	40
39.00	mir-103b-2	Homo sapiens	11	38	0	0	0	0	0	0	1	1	39
37.00	mir-30c-2	Homo sapiens	16	29	0	0	0	0	0	0	7	8	37
37.00	mir-30c-1	Homo sapiens	16	29	0	0	0	0	0	0	8	8	37
37.00	mir-223	Homo sapiens	0	12	0	12	7	25	7	25	0	0	37
36.00	mir-499a	Homo sapiens	5	36	5	36	0	0	0	0	0	0	36
36.00	mir-23b	Homo sapiens	0	10	0	10	0	17	0	17	2	9	36
34.00	mir-29b-2	Homo sapiens	0	5	0	5	4	16	0	0	11	13	34
34.00	mir-23a	Homo sapiens	0	1	0	1	0	33	0	33	0	0	34
33.00	mir-24-1	Homo sapiens	0	8	0	8	0	25	0	0	0	0	33
31.00	mir-16-1	Homo sapiens	6	30	0	0	0	0	0	0	1	1	31
31.00	mir-29b-1	Homo sapiens	1	1	1	1	5	16	0	0	11	14	31
30.00	mir-449b	Homo sapiens	4	29	4	29	0	0	0	0	0	1	30
30.00	mir-32	Homo sapiens	24	27	24	27	0	3	0	3	0	0	30
28.00	mir-135b	Homo sapiens	18	26	18	26	0	0	0	0	1	2	28
27.00	mir-3615	Homo sapiens	0	0	0	0	0	25	0	25	0	2	27
26.00	mir-143	Homo sapiens	0	0	0	0	13	26	13	26	0	0	26
23.00	mir-132	Homo sapiens	0	8	0	8	0	7	0	7	7	8	23
23.00	mir-126	Homo sapiens	0	0	0	0	3	23	3	23	0	0	23
22.00	mir-6510	Homo sapiens	0	0	0	0	3	22	3	22	0	0	22
21.00	mir-1301	Homo sapiens	0	0	0	0	0	15	0	15	2	6	21
20.00	mir-30b	Homo sapiens	9	20	9	20	0	0	0	0	0	0	20
20.00	mir-9-3	Homo sapiens	2	12	0	0	0	0	0	0	7	8	20
20.00	mir-708	Homo sapiens	0	0	0	0	0	20	0	20	0	0	20
20.00	mir-760	Homo sapiens	0	0	0	0	4	20	4	20	0	0	20
20.00	mir-7706	Homo sapiens	0	0	0	0	0	20	0	20	0	0	20
19.00	mir-218-1	Homo sapiens	9	19	0	0	0	0	0	0	0	0	19
19.00	mir-9-2	Homo sapiens	2	11	0	0	0	0	0	0	8	8	19
19.00	mir-339	Homo sapiens	5	5	5	5	0	11	0	11	3	3	19
19.00	mir-574	Homo sapiens	0	1	0	1	8	8	8	8	6	10	19
19.00	mir-10399	Homo sapiens	0	0	0	0	0	14	0	14	5	5	19
18.00	mir-218-2	Homo sapiens	9	18	0	0	0	0	0	0	0	0	18
18.00	mir-9-1	Homo sapiens	2	12	0	0	0	0	0	0	6	6	18
18.00	mir-29c	Homo sapiens	0	5	0	5	0	8	0	6	5	5	18
18.00	mir-10395	Homo sapiens	0	0	0	0	0	15	0	15	3	3	18
17.00	mir-628	Homo sapiens	3	9	3	9	0	8	0	8	0	0	17
16.00	mir-484	Homo sapiens	7	16	7	16	0	0	0	0	0	0	16
16.00	mir-769	Homo sapiens	3	16	3	16	0	0	0	0	0	0	16
16.00	mir-6842	Homo sapiens	3	3	3	3	3	13	3	13	0	0	16
15.00	mir-625	Homo sapiens	0	15	0	15	0	0	0	0	0	0	15
15.00	mir-210	Homo sapiens	0	0	0	0	2	15	2	15	0	0	15
15.00	mir-501	Homo sapiens	0	0	0	0	0	15	0	15	0	0	15
14.00	mir-31	Homo sapiens	0	14	0	14	0	0	0	0	0	0	14
14.00	mir-193a	Homo sapiens	0	14	0	14	0	0	0	0	0	0	14
14.00	mir-589	Homo sapiens	0	14	0	14	0	0	0	0	0	0	14
14.00	mir-185	Homo sapiens	0	13	0	13	0	1	0	1	0	0	14
14.00	mir-1285-1	Homo sapiens	0	1	0	1	0	3	0	0	2	10	14
14.00	mir-652	Homo sapiens	0	0	0	0	7	14	7	14	0	0	14
13.00	mir-345	Homo sapiens	2	13	2	13	0	0	0	0	0	0	13
13.00	mir-511	Homo sapiens	5	13	5	13	0	0	0	0	0	0	13
13.00	mir-619	Homo sapiens	0	10	0	10	0	0	0	0	0	3	13
13.00	mir-328	Homo sapiens	0	0	0	0	4	13	4	13	0	0	13
13.00	mir-1273h	Homo sapiens	0	0	0	0	0	2	0	2	1	11	13
12.00	mir-486-1	Homo sapiens	1	12	0	0	0	0	0	0	0	0	12
12.00	mir-486-2	Homo sapiens	1	12	0	0	0	0	0	0	0	0	12
12.00	mir-502	Homo sapiens	0	0	0	0	5	12	5	12	0	0	12
12.00	mir-3529	Homo sapiens	0	0	0	0	0	0	0	0	12	12	12
12.00	mir-8086	Homo sapiens	0	0	0	0	0	0	0	0	0	12	12
11.00	mir-181d	Homo sapiens	2	10	2	10	0	0	0	0	1	1	11
11.00	mir-374a	Homo sapiens	2	9	2	9	0	0	0	0	2	2	11
11.00	mir-452	Homo sapiens	2	4	2	4	0	0	0	0	7	7	11
11.00	mir-149	Homo sapiens	1	2	1	2	0	0	0	0	9	9	11
11.00	mir-320b-2	Homo sapiens	0	0	0	0	0	11	0	0	0	0	11
10.00	mir-378d-2	Homo sapiens	2	10	2	10	0	0	0	0	0	0	10
10.00	mir-374b	Homo sapiens	3	10	3	10	0	0	0	0	0	0	10
10.00	mir-320b-1	Homo sapiens	0	0	0	0	0	10	0	0	0	0	10
10.00	mir-1299	Homo sapiens	0	0	0	0	0	6	0	6	4	4	10
10.00	mir-3159	Homo sapiens	0	0	0	0	0	0	0	0	1	10	10
10.00	mir-5571	Homo sapiens	0	0	0	0	0	0	0	0	9	10	10
9.00	mir-629	Homo sapiens	6	9	6	9	0	0	0	0	0	0	9
9.00	mir-4661	Homo sapiens	0	9	0	9	0	0	0	0	0	0	9
9.00	mir-203a	Homo sapiens	0	0	0	0	0	9	0	9	0	0	9
9.00	mir-335	Homo sapiens	0	0	0	0	9	9	9	9	0	0	9
9.00	mir-941-2	Homo sapiens	0	0	0	0	4	8	0	0	1	1	9
9.00	mir-941-5	Homo sapiens	0	0	0	0	3	8	0	0	1	1	9
8.00	mir-20a	Homo sapiens	8	8	8	8	0	0	0	0	0	0	8
8.00	mir-642b	Homo sapiens	3	8	3	8	0	0	0	0	0	0	8
8.00	mir-942	Homo sapiens	0	4	0	4	0	0	0	0	4	4	8
8.00	mir-941-1	Homo sapiens	0	0	0	0	3	7	0	0	1	1	8
8.00	mir-1290	Homo sapiens	0	0	0	0	0	8	0	8	0	0	8
8.00	mir-320c-2	Homo sapiens	0	0	0	0	1	8	0	0	0	0	8
7.00	mir-660	Homo sapiens	1	7	1	7	0	0	0	0	0	0	7
7.00	mir-7704	Homo sapiens	0	7	0	7	0	0	0	0	0	0	7
7.00	mir-1269b	Homo sapiens	0	5	0	5	0	0	0	0	2	2	7
7.00	mir-199a-2	Homo sapiens	1	1	0	0	0	5	0	0	1	1	7
7.00	mir-95	Homo sapiens	0	0	0	0	0	7	0	7	0	0	7
7.00	mir-199a-1	Homo sapiens	0	0	0	0	0	6	0	0	1	1	7
7.00	mir-320c-1	Homo sapiens	0	0	0	0	1	7	0	0	0	0	7
7.00	mir-941-3	Homo sapiens	0	0	0	0	3	6	0	0	1	1	7
7.00	mir-676	Homo sapiens	0	0	0	0	4	7	4	7	0	0	7
7.00	mir-3929	Homo sapiens	0	0	0	0	0	0	0	0	0	7	7
6.00	mir-331	Homo sapiens	0	6	0	6	0	0	0	0	0	0	6
6.00	mir-651	Homo sapiens	0	6	0	6	0	0	0	0	0	0	6
6.00	mir-3158-1	Homo sapiens	0	6	0	0	0	0	0	0	0	0	6
6.00	mir-3622a	Homo sapiens	6	6	6	6	0	0	0	0	0	0	6
6.00	mir-1291	Homo sapiens	0	4	0	4	0	0	0	0	2	2	6
6.00	mir-455	Homo sapiens	0	3	0	3	0	0	0	0	0	3	6
6.00	mir-582	Homo sapiens	0	0	0	0	5	6	5	6	0	0	6
6.00	mir-874	Homo sapiens	0	0	0	0	0	6	0	6	0	0	6
6.00	mir-941-4	Homo sapiens	0	0	0	0	3	6	0	0	0	0	6
6.00	mir-4485	Homo sapiens	0	0	0	0	0	0	0	0	4	6	6
6.00	mir-7851	Homo sapiens	0	0	0	0	0	0	0	0	0	6	6
5.00	mir-96	Homo sapiens	2	5	2	5	0	0	0	0	0	0	5
5.00	mir-584	Homo sapiens	0	5	0	5	0	0	0	0	0	0	5
5.00	mir-659	Homo sapiens	0	5	0	5	0	0	0	0	0	0	5
5.00	mir-3158-2	Homo sapiens	0	5	0	0	0	0	0	0	0	0	5
5.00	mir-4466	Homo sapiens	0	5	0	5	0	0	0	0	0	0	5
5.00	mir-4488	Homo sapiens	0	5	0	5	0	0	0	0	0	0	5
5.00	mir-1295b	Homo sapiens	0	5	0	5	0	0	0	0	0	0	5
5.00	mir-3135b	Homo sapiens	0	4	0	4	0	0	0	0	0	1	5
5.00	mir-214	Homo sapiens	0	1	0	1	0	4	0	4	0	0	5
5.00	mir-130a	Homo sapiens	0	0	0	0	0	1	0	1	3	4	5
5.00	mir-503	Homo sapiens	0	0	0	0	0	0	0	0	4	5	5
5.00	mir-514a-1	Homo sapiens	0	0	0	0	4	5	0	0	0	0	5
5.00	mir-514a-2	Homo sapiens	0	0	0	0	4	5	0	0	0	0	5
5.00	mir-421	Homo sapiens	0	0	0	0	0	5	0	5	0	0	5
5.00	mir-671	Homo sapiens	0	0	0	0	4	5	4	5	0	0	5
5.00	mir-147b	Homo sapiens	0	0	0	0	0	5	0	5	0	0	5
5.00	mir-1306	Homo sapiens	0	0	0	0	0	5	0	5	0	0	5
5.00	mir-4706	Homo sapiens	0	0	0	0	0	0	0	0	2	5	5
4.00	mir-17	Homo sapiens	0	4	0	4	0	0	0	0	0	0	4
4.00	mir-34a	Homo sapiens	0	4	0	4	0	0	0	0	0	0	4
4.00	mir-556	Homo sapiens	0	4	0	4	0	0	0	0	0	0	4
4.00	mir-1287	Homo sapiens	0	4	0	4	0	0	0	0	0	0	4
4.00	mir-6501	Homo sapiens	0	4	0	4	0	0	0	0	0	0	4
4.00	mir-6729	Homo sapiens	0	4	0	4	0	0	0	0	0	0	4
4.00	mir-6516	Homo sapiens	0	4	0	4	0	0	0	0	0	0	4
4.00	mir-1268b	Homo sapiens	2	2	2	2	0	0	0	0	1	2	4
4.00	mir-199b	Homo sapiens	0	1	0	1	0	3	0	0	0	0	4
4.00	mir-664b	Homo sapiens	0	1	0	1	0	0	0	0	3	3	4
4.00	mir-197	Homo sapiens	0	0	0	0	3	4	3	4	0	0	4
4.00	mir-187	Homo sapiens	0	0	0	0	0	3	0	3	0	1	4
4.00	mir-145	Homo sapiens	0	0	0	0	0	4	0	4	0	0	4
4.00	mir-514a-3	Homo sapiens	0	0	0	0	4	4	0	0	0	0	4
4.00	mir-548e	Homo sapiens	0	0	0	0	0	4	0	4	0	0	4
4.00	mir-1269a	Homo sapiens	0	0	0	0	2	4	2	4	0	0	4
4.00	mir-1292	Homo sapiens	0	0	0	0	0	0	0	0	4	4	4
4.00	mir-4430	Homo sapiens	0	0	0	0	0	0	0	0	0	4	4
3.00	mir-15a	Homo sapiens	0	3	0	3	0	0	0	0	0	0	3
3.00	mir-194-1	Homo sapiens	0	3	0	0	0	0	0	0	0	0	3
3.00	mir-194-2	Homo sapiens	0	3	0	0	0	0	0	0	0	0	3
3.00	mir-130b	Homo sapiens	0	3	0	3	0	0	0	0	0	0	3
3.00	mir-324	Homo sapiens	3	3	3	3	0	0	0	0	0	0	3
3.00	mir-581	Homo sapiens	0	3	0	3	0	0	0	0	0	0	3
3.00	mir-618	Homo sapiens	3	3	3	3	0	0	0	0	0	0	3
3.00	mir-5090	Homo sapiens	0	3	0	3	0	0	0	0	0	0	3
3.00	mir-6744	Homo sapiens	3	3	3	3	0	0	0	0	0	0	3
3.00	mir-330	Homo sapiens	0	2	0	2	0	1	0	1	0	0	3
3.00	mir-193b	Homo sapiens	0	2	0	2	0	1	0	1	0	0	3
3.00	mir-378c	Homo sapiens	0	2	0	2	0	0	0	0	1	1	3
3.00	mir-9985	Homo sapiens	0	2	0	2	0	0	0	0	0	1	3
3.00	mir-144	Homo sapiens	0	0	0	0	3	3	3	3	0	0	3
3.00	mir-631	Homo sapiens	0	0	0	0	0	0	0	0	3	3	3
3.00	mir-1295a	Homo sapiens	0	0	0	0	3	3	3	3	0	0	3
3.00	mir-3194	Homo sapiens	0	0	0	0	0	0	0	0	2	3	3
3.00	mir-4521	Homo sapiens	0	0	0	0	0	0	0	0	3	3	3
3.00	mir-4775	Homo sapiens	0	0	0	0	0	0	0	0	3	3	3
3.00	mir-5684	Homo sapiens	0	0	0	0	0	0	0	0	0	3	3
2.00	mir-766	Homo sapiens	0	2	0	2	0	0	0	0	0	0	2
2.00	mir-887	Homo sapiens	0	2	0	2	0	0	0	0	0	0	2
2.00	mir-1304	Homo sapiens	0	2	0	2	0	0	0	0	0	0	2
2.00	mir-2115	Homo sapiens	1	2	1	2	0	0	0	0	0	0	2
2.00	mir-3175	Homo sapiens	2	2	2	2	0	0	0	0	0	0	2
2.00	mir-3065	Homo sapiens	0	2	0	2	0	0	0	0	0	0	2
2.00	mir-3614	Homo sapiens	0	2	0	2	0	0	0	0	0	0	2
2.00	mir-3616	Homo sapiens	0	2	0	2	0	0	0	0	0	0	2
2.00	mir-3180-5	Homo sapiens	2	2	0	0	0	0	0	0	0	0	2
2.00	mir-4529	Homo sapiens	0	2	0	2	0	0	0	0	0	0	2
2.00	mir-3064	Homo sapiens	0	2	0	2	0	0	0	0	0	0	2
2.00	mir-9901	Homo sapiens	0	2	0	2	0	0	0	0	0	0	2
2.00	mir-10396b	Homo sapiens	0	2	0	2	0	0	0	0	0	0	2
2.00	mir-18a	Homo sapiens	0	0	0	0	0	2	0	2	0	0	2
2.00	mir-19a	Homo sapiens	0	0	0	0	0	2	0	2	0	0	2
2.00	mir-19b-2	Homo sapiens	0	0	0	0	0	2	0	0	0	0	2
2.00	mir-103a-2	Homo sapiens	0	0	0	0	0	0	0	0	2	2	2
2.00	mir-103a-1	Homo sapiens	0	0	0	0	0	0	0	0	2	2	2
2.00	mir-107	Homo sapiens	0	0	0	0	0	0	0	0	2	2	2
2.00	mir-15b	Homo sapiens	0	0	0	0	0	0	0	0	2	2	2
2.00	mir-296	Homo sapiens	0	0	0	0	0	0	0	0	1	2	2
2.00	mir-576	Homo sapiens	0	0	0	0	2	2	2	2	0	0	2
2.00	mir-1285-2	Homo sapiens	0	0	0	0	0	2	0	0	0	0	2
2.00	mir-1303	Homo sapiens	0	0	0	0	0	0	0	0	0	2	2
2.00	mir-1278	Homo sapiens	0	0	0	0	0	2	0	2	0	0	2
2.00	mir-320d-1	Homo sapiens	0	0	0	0	1	2	0	0	0	0	2
2.00	mir-1273c	Homo sapiens	0	0	0	0	0	0	0	0	0	2	2
2.00	mir-3605	Homo sapiens	0	0	0	0	0	2	0	2	0	0	2
2.00	mir-3665	Homo sapiens	0	0	0	0	0	0	0	0	0	2	2
2.00	mir-4423	Homo sapiens	0	0	0	0	0	2	0	2	0	0	2
2.00	mir-4472-2	Homo sapiens	0	0	0	0	0	0	0	0	2	2	2
2.00	mir-1343	Homo sapiens	0	0	0	0	0	2	0	2	0	0	2
2.00	mir-6868	Homo sapiens	0	0	0	0	2	2	2	2	0	0	2
2.00	mir-6511a-2	Homo sapiens	0	0	0	0	0	1	0	0	1	1	2
2.00	mir-6511a-3	Homo sapiens	0	0	0	0	0	1	0	0	1	1	2
2.00	mir-10401	Homo sapiens	0	0	0	0	0	2	0	2	0	0	2
1.00	mir-129-1	Homo sapiens	0	1	0	0	0	0	0	0	0	0	1
1.00	mir-215	Homo sapiens	0	1	0	1	0	0	0	0	0	0	1
1.00	mir-505	Homo sapiens	1	1	1	1	0	0	0	0	0	0	1
1.00	mir-551b	Homo sapiens	0	1	0	1	0	0	0	0	0	0	1
1.00	mir-1271	Homo sapiens	1	1	1	1	0	0	0	0	0	0	1
1.00	mir-509-3	Homo sapiens	0	1	0	1	0	0	0	0	0	0	1
1.00	mir-939	Homo sapiens	0	1	0	1	0	0	0	0	0	0	1
1.00	mir-1294	Homo sapiens	0	1	0	1	0	0	0	0	0	0	1
1.00	mir-1262	Homo sapiens	0	1	0	1	0	0	0	0	0	0	1
1.00	mir-664a	Homo sapiens	0	1	0	1	0	0	0	0	0	0	1
1.00	mir-3613	Homo sapiens	1	1	1	1	0	0	0	0	0	0	1
1.00	mir-3180-4	Homo sapiens	1	1	0	0	0	0	0	0	0	0	1
1.00	mir-3913-1	Homo sapiens	0	1	0	0	0	0	0	0	0	0	1
1.00	mir-3913-2	Homo sapiens	0	1	0	0	0	0	0	0	0	0	1
1.00	mir-4429	Homo sapiens	0	1	0	1	0	0	0	0	0	0	1
1.00	mir-4510	Homo sapiens	0	1	0	0	0	0	0	0	0	0	1
1.00	mir-4677	Homo sapiens	0	1	0	1	0	0	0	0	0	0	1
1.00	mir-5701-1	Homo sapiens	0	1	0	0	0	0	0	0	0	0	1
1.00	mir-5701-2	Homo sapiens	0	1	0	0	0	0	0	0	0	0	1
1.00	mir-5787	Homo sapiens	0	1	0	1	0	0	0	0	0	0	1
1.00	mir-5701-3	Homo sapiens	0	1	0	0	0	0	0	0	0	0	1
1.00	mir-19b-1	Homo sapiens	0	0	0	0	0	1	0	0	0	0	1
1.00	mir-124-1	Homo sapiens	0	0	0	0	0	0	0	0	0	1	1
1.00	mir-124-2	Homo sapiens	0	0	0	0	0	0	0	0	0	1	1
1.00	mir-133a-1	Homo sapiens	0	0	0	0	0	1	0	0	0	0	1
1.00	mir-326	Homo sapiens	0	0	0	0	1	1	1	1	0	0	1
1.00	mir-504	Homo sapiens	0	0	0	0	0	0	0	0	1	1	1
1.00	mir-598	Homo sapiens	0	0	0	0	0	1	0	1	0	0	1
1.00	mir-873	Homo sapiens	0	0	0	0	0	0	0	0	0	1	1
1.00	mir-1289-1	Homo sapiens	0	0	0	0	0	0	0	0	1	1	1
1.00	mir-513c	Homo sapiens	0	0	0	0	0	0	0	0	1	1	1
1.00	mir-3176	Homo sapiens	0	0	0	0	0	0	0	0	0	1	1
1.00	mir-3177	Homo sapiens	0	0	0	0	0	1	0	1	0	0	1
1.00	mir-3648-1	Homo sapiens	0	0	0	0	0	0	0	0	1	1	1
1.00	mir-3909	Homo sapiens	0	0	0	0	0	0	0	0	1	1	1
1.00	mir-3912	Homo sapiens	0	0	0	0	0	1	0	1	0	0	1
1.00	mir-378f	Homo sapiens	0	0	0	0	0	0	0	0	0	1	1
1.00	mir-4448	Homo sapiens	0	0	0	0	0	1	0	1	0	0	1
1.00	mir-4645	Homo sapiens	0	0	0	0	0	1	0	1	0	0	1
1.00	mir-4658	Homo sapiens	0	0	0	0	0	0	0	0	1	1	1
1.00	mir-4685	Homo sapiens	0	0	0	0	0	1	0	1	0	0	1
1.00	mir-451b	Homo sapiens	0	0	0	0	0	0	0	0	1	1	1
1.00	mir-4762	Homo sapiens	0	0	0	0	0	1	0	1	0	0	1
1.00	mir-5100	Homo sapiens	0	0	0	0	0	1	0	1	0	0	1
1.00	mir-5695	Homo sapiens	0	0	0	0	0	1	0	1	0	0	1
1.00	mir-5696	Homo sapiens	0	0	0	0	0	0	0	0	1	1	1
1.00	mir-6511a-1	Homo sapiens	0	0	0	0	0	1	0	0	0	0	1
1.00	mir-6514	Homo sapiens	0	0	0	0	0	1	0	1	0	0	1
1.00	mir-6743	Homo sapiens	0	0	0	0	0	1	0	1	0	0	1
1.00	mir-3648-2	Homo sapiens	0	0	0	0	0	0	0	0	1	1	1
0.00	mir-124-3	Homo sapiens	0	0	0	0	0	0	0	0	0	0	0
0.00	mir-133a-2	Homo sapiens	0	0	0	0	0	0	0	0	0	0	0
0.00	mir-129-2	Homo sapiens	0	0	0	0	0	0	0	0	0	0	0
0.00	mir-320d-2	Homo sapiens	0	0	0	0	0	0	0	0	0	0	0
0.00	mir-6511b-1	Homo sapiens	0	0	0	0	0	0	0	0	0	0	0
0.00	mir-6511b-2	Homo sapiens	0	0	0	0	0	0	0	0	0	0	0
0.00	mir-6511a-4	Homo sapiens	0	0	0	0	0	0	0	0	0	0	0

## Sheet: D11
Expression values	Name	Resource	Exact mature 5'	Mature 5'	Unique exact mature 5'	Unique mature 5'	Exact mature 3'	Mature 3'	Unique exact mature 3'	Unique mature 3'	Exact other	Other	Total
7,200.00	mir-148a	Homo sapiens	0	4	0	4	6066	7160	6066	7151	29	36	7200
6,002.00	mir-21	Homo sapiens	2263	5873	2263	5873	0	0	0	0	111	129	6002
5,388.00	mir-200a	Homo sapiens	51	103	51	103	0	5263	0	5255	20	22	5388
3,291.00	mir-34c	Homo sapiens	104	2816	104	2815	8	14	8	14	436	461	3291
2,811.00	mir-99a	Homo sapiens	17	2803	17	2799	0	0	0	0	8	8	2811
2,412.00	let-7b	Homo sapiens	657	1886	657	1883	0	1	0	1	494	525	2412
2,389.00	mir-27b	Homo sapiens	0	0	0	0	34	2388	34	2364	0	1	2389
2,365.00	mir-200b	Homo sapiens	26	104	26	104	279	2246	279	2244	9	15	2365
1,627.00	mir-27a	Homo sapiens	1	2	1	2	6	1625	6	1602	0	0	1627
1,541.00	mir-200c	Homo sapiens	0	0	0	0	308	1476	308	1474	55	65	1541
1,458.00	mir-3960	Homo sapiens	0	0	0	0	0	10	0	10	2	1448	1458
1,454.00	mir-151a	Homo sapiens	205	377	205	377	618	1068	618	1068	4	9	1454
1,395.00	let-7i	Homo sapiens	888	1248	888	1245	0	1	0	1	122	146	1395
900.00	mir-375	Homo sapiens	0	0	0	0	155	734	155	734	138	166	900
750.00	let-7g	Homo sapiens	125	725	125	723	0	0	0	0	21	25	750
742.00	let-7a-3	Homo sapiens	62	690	0	2	0	6	0	0	32	46	742
737.00	let-7a-1	Homo sapiens	62	691	0	0	0	5	0	0	31	41	737
731.00	let-7a-2	Homo sapiens	62	688	0	0	0	0	0	0	32	43	731
710.00	mir-3074	Homo sapiens	0	695	0	695	0	14	0	14	1	1	710
656.00	mir-22	Homo sapiens	0	49	0	49	202	543	202	543	52	64	656
617.00	mir-30d	Homo sapiens	128	568	128	568	0	4	0	3	39	45	617
607.00	let-7f-2	Homo sapiens	72	594	0	14	0	0	0	0	13	13	607
594.00	let-7f-1	Homo sapiens	71	581	0	1	0	0	0	0	13	13	594
509.00	let-7c	Homo sapiens	191	439	191	436	0	0	0	0	65	70	509
489.00	mir-203b	Homo sapiens	2	489	2	489	0	0	0	0	0	0	489
464.00	mir-146a	Homo sapiens	151	463	151	448	0	0	0	0	1	1	464
371.00	mir-8072	Homo sapiens	0	0	0	0	0	0	0	0	1	371	371
306.00	mir-26a-2	Homo sapiens	196	302	0	0	0	0	0	0	4	4	306
301.00	mir-26a-1	Homo sapiens	197	296	0	0	0	0	0	0	5	5	301
289.00	mir-423	Homo sapiens	29	159	29	159	34	98	34	98	27	32	289
271.00	mir-429	Homo sapiens	0	0	0	0	87	265	87	265	6	6	271
270.00	mir-222	Homo sapiens	0	0	0	0	176	262	176	262	4	8	270
267.00	mir-320a	Homo sapiens	0	0	0	0	101	265	101	252	0	2	267
263.00	mir-30a	Homo sapiens	48	196	48	195	2	47	2	47	19	20	263
241.00	mir-125a	Homo sapiens	3	190	3	190	0	4	0	4	40	47	241
228.00	mir-29a	Homo sapiens	0	0	0	0	2	186	2	186	39	42	228
221.00	mir-10400	Homo sapiens	0	221	0	221	0	0	0	0	0	0	221
212.00	mir-205	Homo sapiens	24	210	24	210	0	0	0	0	0	2	212
210.00	mir-92b	Homo sapiens	0	17	0	17	22	112	22	110	51	81	210
161.00	mir-1246	Homo sapiens	12	161	12	161	0	0	0	0	0	0	161
158.00	let-7d	Homo sapiens	0	152	0	150	0	3	0	3	3	3	158
149.00	mir-141	Homo sapiens	1	3	1	3	0	133	0	125	13	13	149
135.00	mir-25	Homo sapiens	0	0	0	0	73	133	73	133	2	2	135
134.00	mir-183	Homo sapiens	49	131	49	131	0	2	0	2	0	1	134
126.00	mir-100	Homo sapiens	1	126	1	122	0	0	0	0	0	0	126
121.00	mir-99b	Homo sapiens	18	106	18	106	6	9	6	9	6	6	121
109.00	mir-128-1	Homo sapiens	0	0	0	0	34	109	0	13	0	0	109
104.00	mir-142	Homo sapiens	2	12	2	12	0	1	0	1	79	91	104
103.00	mir-34b	Homo sapiens	0	7	0	6	1	94	1	94	1	2	103
103.00	mir-1180	Homo sapiens	0	0	0	0	35	89	35	89	12	14	103
101.00	mir-181a-1	Homo sapiens	1	78	0	0	0	2	0	2	17	21	101
97.00	mir-182	Homo sapiens	8	62	8	62	0	0	0	0	31	35	97
97.00	mir-128-2	Homo sapiens	0	0	0	0	34	97	0	2	0	0	97
94.00	mir-181a-2	Homo sapiens	2	80	0	0	0	0	0	0	13	14	94
90.00	mir-125b-2	Homo sapiens	7	51	0	0	0	4	0	4	31	35	90
89.00	mir-2110	Homo sapiens	7	76	7	76	0	0	0	0	3	13	89
88.00	mir-26b	Homo sapiens	52	88	52	88	0	0	0	0	0	0	88
88.00	mir-125b-1	Homo sapiens	6	50	0	0	0	2	0	2	30	36	88
86.00	mir-146b	Homo sapiens	30	85	30	69	0	0	0	0	1	1	86
80.00	mir-378a	Homo sapiens	0	0	0	0	3	80	3	80	0	0	80
79.00	mir-191	Homo sapiens	28	65	28	65	0	0	0	0	14	14	79
79.00	mir-186	Homo sapiens	16	77	16	77	0	0	0	0	1	2	79
77.00	mir-30e	Homo sapiens	10	51	10	51	3	11	3	10	15	15	77
74.00	mir-221	Homo sapiens	0	8	0	8	0	49	0	49	14	17	74
74.00	mir-152	Homo sapiens	0	0	0	0	21	72	21	72	0	2	74
71.00	mir-28	Homo sapiens	1	42	1	42	9	27	9	27	1	2	71
68.00	mir-192	Homo sapiens	14	54	14	54	0	0	0	0	13	14	68
68.00	mir-148b	Homo sapiens	0	0	0	0	27	64	27	54	4	4	68
62.00	mir-224	Homo sapiens	0	29	0	29	0	0	0	0	28	33	62
61.00	mir-101-2	Homo sapiens	0	0	0	0	10	57	0	3	2	4	61
52.00	mir-101-1	Homo sapiens	0	0	0	0	10	50	0	0	2	2	52
51.00	mir-92a-1	Homo sapiens	0	0	0	0	12	51	0	8	0	0	51
49.00	mir-532	Homo sapiens	33	49	33	49	0	0	0	0	0	0	49
46.00	mir-449c	Homo sapiens	0	46	0	46	0	0	0	0	0	0	46
45.00	mir-340	Homo sapiens	20	43	20	43	0	1	0	1	0	1	45
45.00	mir-8086	Homo sapiens	0	0	0	0	0	0	0	0	0	45	45
40.00	mir-143	Homo sapiens	0	0	0	0	19	40	19	40	0	0	40
40.00	mir-1290	Homo sapiens	0	0	0	0	0	40	0	40	0	0	40
39.00	let-7e	Homo sapiens	1	35	1	33	0	0	0	0	4	4	39
39.00	mir-92a-2	Homo sapiens	0	0	0	0	12	39	0	2	0	0	39
38.00	mir-361	Homo sapiens	0	4	0	4	2	30	2	30	3	4	38
38.00	mir-744	Homo sapiens	4	36	4	36	0	0	0	0	2	2	38
36.00	mir-342	Homo sapiens	8	31	8	31	0	3	0	3	2	2	36
36.00	mir-3159	Homo sapiens	0	0	0	0	0	0	0	0	3	36	36
36.00	mir-3615	Homo sapiens	0	0	0	0	0	35	0	35	0	1	36
35.00	mir-184	Homo sapiens	0	0	0	0	24	34	24	34	1	1	35
34.00	mir-449a	Homo sapiens	16	34	16	34	0	0	0	0	0	0	34
34.00	mir-3184	Homo sapiens	0	3	0	3	0	0	0	0	29	31	34
31.00	mir-1307	Homo sapiens	3	6	3	6	0	24	0	24	0	1	31
30.00	mir-1285-1	Homo sapiens	0	0	0	0	0	0	0	0	6	30	30
28.00	mir-98	Homo sapiens	7	20	7	18	0	0	0	0	6	8	28
26.00	mir-24-2	Homo sapiens	0	11	0	11	0	12	0	0	2	3	26
26.00	mir-23b	Homo sapiens	1	14	1	14	0	9	0	9	1	3	26
25.00	mir-16-2	Homo sapiens	1	13	0	0	0	9	0	9	3	3	25
25.00	mir-135b	Homo sapiens	19	25	19	25	0	0	0	0	0	0	25
24.00	mir-451a	Homo sapiens	0	24	0	24	0	0	0	0	0	0	24
23.00	mir-1843	Homo sapiens	0	23	0	23	0	0	0	0	0	0	23
22.00	mir-140	Homo sapiens	0	2	0	2	3	17	3	17	0	3	22
22.00	mir-181b-2	Homo sapiens	2	8	0	0	0	0	0	0	12	14	22
22.00	mir-619	Homo sapiens	1	11	1	11	0	0	0	0	0	11	22
20.00	mir-181b-1	Homo sapiens	2	8	0	0	0	0	0	0	12	12	20
19.00	mir-7-2	Homo sapiens	4	10	0	0	0	0	0	0	8	9	19
19.00	mir-1273h	Homo sapiens	0	1	0	1	0	0	0	0	3	18	19
18.00	mir-95	Homo sapiens	0	0	0	0	0	18	0	18	0	0	18
18.00	mir-7-3	Homo sapiens	3	12	0	0	0	0	0	0	6	6	18
18.00	mir-628	Homo sapiens	0	4	0	4	2	9	2	9	5	5	18
18.00	mir-103b-1	Homo sapiens	5	16	0	0	0	0	0	0	2	2	18
17.00	mir-7-1	Homo sapiens	3	9	0	0	0	0	0	0	7	8	17
17.00	mir-218-1	Homo sapiens	10	16	0	0	0	0	0	0	0	1	17
17.00	mir-9-1	Homo sapiens	2	8	0	0	1	3	0	0	6	6	17
16.00	mir-23a	Homo sapiens	0	2	0	2	0	14	0	14	0	0	16
16.00	mir-103b-2	Homo sapiens	5	16	0	0	0	0	0	0	0	0	16
15.00	mir-24-1	Homo sapiens	0	1	0	1	0	13	0	0	1	1	15
15.00	mir-7851	Homo sapiens	0	0	0	0	0	0	0	0	0	15	15
14.00	mir-16-1	Homo sapiens	1	14	0	0	0	0	0	0	0	0	14
14.00	mir-31	Homo sapiens	2	14	2	14	0	0	0	0	0	0	14
14.00	mir-9-3	Homo sapiens	1	5	0	0	1	3	0	0	5	6	14
14.00	mir-106b	Homo sapiens	0	1	0	1	0	6	0	6	6	7	14
14.00	mir-29c	Homo sapiens	0	4	0	4	0	3	0	3	6	7	14
14.00	mir-363	Homo sapiens	0	0	0	0	12	14	12	14	0	0	14
13.00	mir-150	Homo sapiens	7	13	7	13	0	0	0	0	0	0	13
13.00	mir-339	Homo sapiens	0	0	0	0	0	13	0	13	0	0	13
13.00	mir-452	Homo sapiens	1	3	1	3	0	0	0	0	9	10	13
13.00	mir-499a	Homo sapiens	3	13	3	13	0	0	0	0	0	0	13
13.00	mir-190b	Homo sapiens	8	13	8	13	0	0	0	0	0	0	13
12.00	mir-32	Homo sapiens	7	12	7	12	0	0	0	0	0	0	12
12.00	mir-218-2	Homo sapiens	9	12	0	0	0	0	0	0	0	0	12
12.00	mir-9-2	Homo sapiens	1	6	0	0	0	1	0	0	5	5	12
12.00	mir-328	Homo sapiens	0	0	0	0	8	12	8	12	0	0	12
12.00	mir-629	Homo sapiens	9	12	9	12	0	0	0	0	0	0	12
12.00	mir-3665	Homo sapiens	0	0	0	0	0	0	0	0	0	12	12
12.00	mir-5684	Homo sapiens	0	0	0	0	0	0	0	0	0	12	12
11.00	mir-132	Homo sapiens	0	4	0	4	0	4	0	4	1	3	11
11.00	mir-501	Homo sapiens	0	0	0	0	0	11	0	11	0	0	11
11.00	mir-769	Homo sapiens	3	11	3	11	0	0	0	0	0	0	11
11.00	mir-4430	Homo sapiens	0	0	0	0	0	0	0	0	0	11	11
10.00	mir-320b-2	Homo sapiens	0	0	0	0	0	10	0	0	0	0	10
10.00	mir-708	Homo sapiens	0	0	0	0	0	10	0	10	0	0	10
10.00	mir-1269a	Homo sapiens	0	0	0	0	2	9	2	9	1	1	10
9.00	mir-193a	Homo sapiens	1	7	1	7	0	0	0	0	2	2	9
9.00	mir-155	Homo sapiens	1	8	1	8	0	0	0	0	1	1	9
9.00	mir-345	Homo sapiens	0	9	0	9	0	0	0	0	0	0	9
9.00	mir-511	Homo sapiens	3	8	3	8	0	0	0	0	1	1	9
9.00	mir-320b-1	Homo sapiens	0	0	0	0	0	9	0	0	0	0	9
8.00	mir-181d	Homo sapiens	6	8	6	8	0	0	0	0	0	0	8
8.00	mir-574	Homo sapiens	0	0	0	0	2	3	2	3	3	5	8
8.00	mir-449b	Homo sapiens	0	8	0	8	0	0	0	0	0	0	8
8.00	mir-3929	Homo sapiens	0	0	0	0	0	0	0	0	0	8	8
8.00	mir-3529	Homo sapiens	0	0	0	0	0	0	0	0	6	8	8
7.00	mir-20a	Homo sapiens	6	7	6	7	0	0	0	0	0	0	7
7.00	mir-29b-2	Homo sapiens	0	0	0	0	1	4	0	0	3	3	7
7.00	mir-425	Homo sapiens	1	6	1	6	0	1	0	1	0	0	7
7.00	mir-10395	Homo sapiens	0	0	0	0	1	7	1	7	0	0	7
6.00	mir-10a	Homo sapiens	0	4	0	4	0	0	0	0	2	2	6
6.00	mir-185	Homo sapiens	0	6	0	6	0	0	0	0	0	0	6
6.00	mir-374a	Homo sapiens	1	6	1	6	0	0	0	0	0	0	6
6.00	mir-502	Homo sapiens	0	0	0	0	0	6	0	5	0	0	6
6.00	mir-651	Homo sapiens	0	6	0	6	0	0	0	0	0	0	6
6.00	mir-147b	Homo sapiens	0	1	0	1	0	5	0	5	0	0	6
6.00	mir-1287	Homo sapiens	1	6	1	6	0	0	0	0	0	0	6
6.00	mir-3913-2	Homo sapiens	0	6	0	0	0	0	0	0	0	0	6
6.00	mir-4446	Homo sapiens	0	0	0	0	4	5	4	5	1	1	6
5.00	mir-30c-2	Homo sapiens	1	2	0	0	0	1	0	1	1	2	5
5.00	mir-210	Homo sapiens	0	0	0	0	1	5	1	5	0	0	5
5.00	mir-223	Homo sapiens	0	3	0	3	0	2	0	2	0	0	5
5.00	mir-149	Homo sapiens	0	2	0	2	0	0	0	0	1	3	5
5.00	mir-484	Homo sapiens	0	5	0	5	0	0	0	0	0	0	5
5.00	mir-652	Homo sapiens	0	0	0	0	1	5	1	5	0	0	5
5.00	mir-3125	Homo sapiens	0	0	0	0	0	0	0	0	0	5	5
5.00	mir-3135b	Homo sapiens	0	0	0	0	0	0	0	0	0	5	5
5.00	mir-378i	Homo sapiens	0	5	0	5	0	0	0	0	0	0	5
5.00	mir-6510	Homo sapiens	0	0	0	0	0	5	0	5	0	0	5
5.00	mir-9985	Homo sapiens	0	5	0	5	0	0	0	0	0	0	5
4.00	mir-29b-1	Homo sapiens	0	0	0	0	0	2	0	0	2	2	4
4.00	mir-197	Homo sapiens	0	0	0	0	1	4	1	4	0	0	4
4.00	mir-187	Homo sapiens	0	1	0	1	0	2	0	2	1	1	4
4.00	mir-199b	Homo sapiens	0	2	0	2	0	2	0	0	0	0	4
4.00	mir-30c-1	Homo sapiens	0	2	0	0	0	0	0	0	1	2	4
4.00	mir-486-1	Homo sapiens	1	4	0	2	0	0	0	0	0	0	4
4.00	mir-455	Homo sapiens	0	4	0	4	0	0	0	0	0	0	4
4.00	mir-582	Homo sapiens	0	0	0	0	4	4	4	4	0	0	4
4.00	mir-671	Homo sapiens	0	1	0	1	1	3	1	3	0	0	4
4.00	mir-320c-1	Homo sapiens	0	0	0	0	1	4	0	0	0	0	4
4.00	mir-1301	Homo sapiens	0	0	0	0	1	1	1	1	2	3	4
4.00	mir-676	Homo sapiens	0	1	0	1	0	3	0	3	0	0	4
4.00	mir-4485	Homo sapiens	0	0	0	0	0	2	0	2	0	2	4
4.00	mir-7704	Homo sapiens	0	4	0	4	0	0	0	0	0	0	4
4.00	mir-3648-2	Homo sapiens	0	0	0	0	0	0	0	0	3	4	4
4.00	mir-941-5	Homo sapiens	0	0	0	0	0	3	0	0	1	1	4
3.00	mir-96	Homo sapiens	1	3	1	3	0	0	0	0	0	0	3
3.00	mir-199a-2	Homo sapiens	0	0	0	0	0	3	0	0	0	0	3
3.00	mir-126	Homo sapiens	0	0	0	0	0	3	0	3	0	0	3
3.00	mir-194-1	Homo sapiens	0	3	0	0	0	0	0	0	0	0	3
3.00	mir-194-2	Homo sapiens	0	3	0	0	0	0	0	0	0	0	3
3.00	mir-514a-2	Homo sapiens	0	0	0	0	2	3	0	0	0	0	3
3.00	mir-3135a	Homo sapiens	0	0	0	0	0	0	0	0	0	3	3
3.00	mir-3913-1	Homo sapiens	0	3	0	0	0	0	0	0	0	0	3
3.00	mir-1268b	Homo sapiens	0	0	0	0	0	0	0	0	0	3	3
3.00	mir-4472-2	Homo sapiens	0	0	0	0	0	0	0	0	0	3	3
3.00	mir-5193	Homo sapiens	0	0	0	0	1	3	1	3	0	0	3
3.00	mir-6736	Homo sapiens	0	1	0	1	0	0	0	0	2	2	3
3.00	mir-6842	Homo sapiens	0	0	0	0	1	2	1	2	0	1	3
3.00	mir-10399	Homo sapiens	0	0	0	0	0	1	0	1	1	2	3
2.00	mir-19b-2	Homo sapiens	0	0	0	0	0	2	0	0	0	0	2
2.00	mir-103a-1	Homo sapiens	0	0	0	0	0	0	0	0	1	2	2
2.00	mir-199a-1	Homo sapiens	0	0	0	0	0	2	0	0	0	0	2
2.00	mir-181c	Homo sapiens	0	0	0	0	0	1	0	1	1	1	2
2.00	mir-204	Homo sapiens	0	2	0	2	0	0	0	0	0	0	2
2.00	mir-330	Homo sapiens	0	2	0	2	0	0	0	0	0	0	2
2.00	mir-331	Homo sapiens	0	2	0	2	0	0	0	0	0	0	2
2.00	mir-335	Homo sapiens	0	0	0	0	0	2	0	2	0	0	2
2.00	mir-422a	Homo sapiens	0	2	0	2	0	0	0	0	0	0	2
2.00	mir-514a-1	Homo sapiens	0	0	0	0	2	2	0	0	0	0	2
2.00	mir-514a-3	Homo sapiens	0	0	0	0	2	2	0	0	0	0	2
2.00	mir-548b	Homo sapiens	0	2	0	2	0	0	0	0	0	0	2
2.00	mir-589	Homo sapiens	0	2	0	2	0	0	0	0	0	0	2
2.00	mir-625	Homo sapiens	0	2	0	2	0	0	0	0	0	0	2
2.00	mir-454	Homo sapiens	0	1	0	1	1	1	1	1	0	0	2
2.00	mir-766	Homo sapiens	0	2	0	2	0	0	0	0	0	0	2
2.00	mir-874	Homo sapiens	0	0	0	0	2	2	2	2	0	0	2
2.00	mir-877	Homo sapiens	0	0	0	0	0	0	0	0	2	2	2
2.00	mir-760	Homo sapiens	0	0	0	0	1	2	1	2	0	0	2
2.00	mir-941-1	Homo sapiens	0	0	0	0	0	1	0	0	0	1	2
2.00	mir-941-2	Homo sapiens	0	0	0	0	1	1	0	0	1	1	2
2.00	mir-941-3	Homo sapiens	0	0	0	0	1	2	0	0	0	0	2
2.00	mir-941-4	Homo sapiens	0	0	0	0	1	2	0	0	0	0	2
2.00	mir-942	Homo sapiens	1	1	1	1	0	0	0	0	0	1	2
2.00	mir-1295a	Homo sapiens	0	0	0	0	2	2	2	2	0	0	2
2.00	mir-1268a	Homo sapiens	0	0	0	0	0	0	0	0	0	2	2
2.00	mir-1306	Homo sapiens	0	0	0	0	0	0	0	0	0	2	2
2.00	mir-320c-2	Homo sapiens	0	0	0	0	1	2	0	0	0	0	2
2.00	mir-3158-1	Homo sapiens	0	2	0	0	0	0	0	0	0	0	2
2.00	mir-3158-2	Homo sapiens	0	2	0	0	0	0	0	0	0	0	2
2.00	mir-3164	Homo sapiens	0	0	0	0	0	0	0	0	0	2	2
2.00	mir-1260b	Homo sapiens	0	2	0	2	0	0	0	0	0	0	2
2.00	mir-3614	Homo sapiens	0	1	0	1	0	0	0	0	1	1	2
2.00	mir-3648-1	Homo sapiens	0	0	0	0	0	0	0	0	2	2	2
2.00	mir-642b	Homo sapiens	0	2	0	2	0	0	0	0	0	0	2
2.00	mir-4488	Homo sapiens	0	2	0	2	0	0	0	0	0	0	2
2.00	mir-4733	Homo sapiens	0	2	0	2	0	0	0	0	0	0	2
2.00	mir-4753	Homo sapiens	0	2	0	2	0	0	0	0	0	0	2
2.00	mir-6511b-2	Homo sapiens	0	1	0	0	0	1	0	0	0	0	2
2.00	mir-7155	Homo sapiens	0	0	0	0	0	2	0	2	0	0	2
2.00	mir-486-2	Homo sapiens	1	2	0	0	0	0	0	0	0	0	2
2.00	mir-10396b	Homo sapiens	0	2	0	2	0	0	0	0	0	0	2
1.00	mir-15a	Homo sapiens	0	1	0	1	0	0	0	0	0	0	1
1.00	mir-18a	Homo sapiens	0	0	0	0	0	0	0	0	1	1	1
1.00	mir-19a	Homo sapiens	0	0	0	0	0	1	0	1	0	0	1
1.00	mir-103a-2	Homo sapiens	0	0	0	0	0	0	0	0	1	1	1
1.00	mir-107	Homo sapiens	0	0	0	0	0	0	0	0	1	1	1
1.00	mir-10b	Homo sapiens	0	1	0	1	0	0	0	0	0	0	1
1.00	mir-130a	Homo sapiens	0	0	0	0	0	1	0	1	0	0	1
1.00	mir-145	Homo sapiens	0	0	0	0	0	1	0	1	0	0	1
1.00	mir-195	Homo sapiens	0	0	0	0	0	1	0	1	0	0	1
1.00	mir-130b	Homo sapiens	0	0	0	0	0	1	0	1	0	0	1
1.00	mir-326	Homo sapiens	0	0	0	0	1	1	1	1	0	0	1
1.00	mir-324	Homo sapiens	0	0	0	0	0	0	0	0	0	1	1
1.00	mir-516b-2	Homo sapiens	1	1	0	0	0	0	0	0	0	0	1
1.00	mir-500a	Homo sapiens	0	1	0	1	0	0	0	0	0	0	1
1.00	mir-504	Homo sapiens	0	1	0	1	0	0	0	0	0	0	1
1.00	mir-505	Homo sapiens	0	1	0	1	0	0	0	0	0	0	1
1.00	mir-556	Homo sapiens	0	1	0	1	0	0	0	0	0	0	1
1.00	mir-576	Homo sapiens	0	0	0	0	0	1	0	1	0	0	1
1.00	mir-590	Homo sapiens	0	0	0	0	1	1	1	1	0	0	1
1.00	mir-592	Homo sapiens	0	1	0	1	0	0	0	0	0	0	1
1.00	mir-542	Homo sapiens	0	0	0	0	1	1	1	1	0	0	1
1.00	mir-450b	Homo sapiens	1	1	1	1	0	0	0	0	0	0	1
1.00	mir-374b	Homo sapiens	0	1	0	1	0	0	0	0	0	0	1
1.00	mir-937	Homo sapiens	0	0	0	0	0	1	0	1	0	0	1
1.00	mir-1227	Homo sapiens	0	0	0	0	0	1	0	1	0	0	1
1.00	mir-1285-2	Homo sapiens	0	0	0	0	0	0	0	0	0	1	1
1.00	mir-1291	Homo sapiens	0	0	0	0	0	0	0	0	1	1	1
1.00	mir-1304	Homo sapiens	0	0	0	0	0	0	0	0	0	1	1
1.00	mir-548f-5	Homo sapiens	0	0	0	0	0	0	0	0	0	1	1
1.00	mir-548o	Homo sapiens	0	0	0	0	1	1	0	0	0	0	1
1.00	mir-548i-3	Homo sapiens	0	1	0	0	0	0	0	0	0	0	1
1.00	mir-1284	Homo sapiens	0	1	0	1	0	0	0	0	0	0	1
1.00	mir-1292	Homo sapiens	0	0	0	0	0	0	0	0	0	1	1
1.00	mir-320d-2	Homo sapiens	0	0	0	0	1	1	0	0	0	0	1
1.00	mir-1973	Homo sapiens	0	0	0	0	1	1	1	1	0	0	1
1.00	mir-3150a	Homo sapiens	0	1	0	1	0	0	0	0	0	0	1
1.00	mir-3189	Homo sapiens	0	0	0	0	0	0	0	0	1	1	1
1.00	mir-3195	Homo sapiens	0	0	0	0	0	0	0	0	0	1	1
1.00	mir-3202-1	Homo sapiens	0	0	0	0	0	0	0	0	0	1	1
1.00	mir-3202-2	Homo sapiens	0	0	0	0	0	0	0	0	0	1	1
1.00	mir-378c	Homo sapiens	0	0	0	0	0	0	0	0	1	1	1
1.00	mir-4291	Homo sapiens	0	0	0	0	0	0	0	0	0	1	1
1.00	mir-3180-4	Homo sapiens	1	1	0	0	0	0	0	0	0	0	1
1.00	mir-3908	Homo sapiens	0	0	0	0	0	0	0	0	0	1	1
1.00	mir-378g	Homo sapiens	0	1	0	1	0	0	0	0	0	0	1
1.00	mir-4429	Homo sapiens	0	1	0	1	0	0	0	0	0	0	1
1.00	mir-4449	Homo sapiens	0	0	0	0	0	0	0	0	1	1	1
1.00	mir-4510	Homo sapiens	0	0	0	0	0	0	0	0	0	1	1
1.00	mir-4516	Homo sapiens	0	1	0	1	0	0	0	0	0	0	1
1.00	mir-4529	Homo sapiens	0	1	0	1	0	0	0	0	0	0	1
1.00	mir-4650-1	Homo sapiens	0	0	0	0	0	0	0	0	0	1	1
1.00	mir-4664	Homo sapiens	0	0	0	0	0	1	0	1	0	0	1
1.00	mir-4742	Homo sapiens	0	0	0	0	0	1	0	1	0	0	1
1.00	mir-5089	Homo sapiens	0	0	0	0	0	1	0	1	0	0	1
1.00	mir-5571	Homo sapiens	0	0	0	0	0	0	0	0	1	1	1
1.00	mir-5585	Homo sapiens	0	0	0	0	0	1	0	1	0	0	1
1.00	mir-6127	Homo sapiens	0	0	0	0	0	0	0	0	0	1	1
1.00	mir-6499	Homo sapiens	0	1	0	1	0	0	0	0	0	0	1
1.00	mir-6500	Homo sapiens	0	0	0	0	0	1	0	1	0	0	1
1.00	mir-6770-1	Homo sapiens	0	1	0	0	0	0	0	0	0	0	1
1.00	mir-6821	Homo sapiens	0	1	0	1	0	0	0	0	0	0	1
1.00	mir-6855	Homo sapiens	0	0	0	0	0	0	0	0	1	1	1
1.00	mir-6770-3	Homo sapiens	0	1	0	0	0	0	0	0	0	0	1
1.00	mir-9902-1	Homo sapiens	0	0	0	0	0	0	0	0	0	1	1
1.00	mir-10398	Homo sapiens	0	0	0	0	1	1	1	1	0	0	1
1.00	mir-10401	Homo sapiens	0	0	0	0	0	0	0	0	1	1	1
1.00	mir-10527	Homo sapiens	0	1	0	1	0	0	0	0	0	0	1
1.00	mir-12125	Homo sapiens	0	0	0	0	0	0	0	0	1	1	1
1.00	mir-9902-2	Homo sapiens	0	0	0	0	0	0	0	0	0	1	1
0.00	mir-19b-1	Homo sapiens	0	0	0	0	0	0	0	0	0	0	0
0.00	mir-516b-1	Homo sapiens	0	0	0	0	0	0	0	0	0	0	0
0.00	mir-1303	Homo sapiens	0	0	0	0	0	0	0	0	0	0	0
0.00	mir-548i-1	Homo sapiens	0	0	0	0	0	0	0	0	0	0	0
0.00	mir-548i-2	Homo sapiens	0	0	0	0	0	0	0	0	0	0	0
0.00	mir-548i-4	Homo sapiens	0	0	0	0	0	0	0	0	0	0	0
0.00	mir-320d-1	Homo sapiens	0	0	0	0	0	0	0	0	0	0	0
0.00	mir-1273c	Homo sapiens	0	0	0	0	0	0	0	0	0	0	0
0.00	mir-3180-5	Homo sapiens	0	0	0	0	0	0	0	0	0	0	0
0.00	mir-548o-2	Homo sapiens	0	0	0	0	0	0	0	0	0	0	0
0.00	mir-4650-2	Homo sapiens	0	0	0	0	0	0	0	0	0	0	0
0.00	mir-5689	Homo sapiens	0	0	0	0	0	0	0	0	0	0	0
0.00	mir-6511b-1	Homo sapiens	0	0	0	0	0	0	0	0	0	0	0
0.00	mir-7110	Homo sapiens	0	0	0	0	0	0	0	0	0	0	0
0.00	mir-6770-2	Homo sapiens	0	0	0	0	0	0	0	0	0	0	0

## Sheet: F7
Expression values	Name	Resource	Exact mature 5'	Mature 5'	Unique exact mature 5'	Unique mature 5'	Exact mature 3'	Mature 3'	Unique exact mature 3'	Unique mature 3'	Exact other	Other	Total
14,124.00	mir-148a	Homo sapiens	3	8	3	8	11797	14080	11797	14053	30	36	14124
13,306.00	mir-21	Homo sapiens	4396	13076	4396	13076	4	5	4	5	187	225	13306
11,245.00	mir-200a	Homo sapiens	115	302	115	302	1	10859	1	10841	78	84	11245
7,076.00	mir-34c	Homo sapiens	630	6301	630	6300	51	103	51	103	615	672	7076
5,697.00	mir-99a	Homo sapiens	41	5665	41	5656	0	0	0	0	26	32	5697
5,515.00	mir-200b	Homo sapiens	30	99	30	99	677	5383	677	5374	19	33	5515
4,669.00	let-7b	Homo sapiens	1629	4194	1629	4192	0	4	0	4	435	471	4669
3,743.00	let-7i	Homo sapiens	2560	3546	2560	3539	0	0	0	0	164	197	3743
3,710.00	mir-200c	Homo sapiens	0	0	0	0	563	3578	563	3570	102	132	3710
3,144.00	mir-151a	Homo sapiens	95	189	95	189	1776	2931	1776	2931	8	24	3144
2,305.00	mir-27b	Homo sapiens	0	0	0	0	114	2305	114	2268	0	0	2305
2,221.00	mir-27a	Homo sapiens	2	4	2	4	14	2216	14	2175	1	1	2221
2,010.00	mir-30d	Homo sapiens	341	1935	341	1934	0	1	0	1	61	74	2010
1,828.00	let-7g	Homo sapiens	588	1793	588	1785	0	0	0	0	22	35	1828
1,588.00	mir-146a	Homo sapiens	575	1585	575	1567	0	0	0	0	2	3	1588
1,564.00	mir-375	Homo sapiens	0	0	0	0	332	1394	332	1394	132	170	1564
1,063.00	mir-3074	Homo sapiens	1	1039	1	1039	0	23	0	23	1	1	1063
1,057.00	mir-423	Homo sapiens	299	878	299	878	58	110	58	110	61	69	1057
1,007.00	mir-92b	Homo sapiens	0	69	0	69	132	817	132	806	76	121	1007
950.00	mir-26a-2	Homo sapiens	646	941	0	0	0	1	0	1	7	8	950
949.00	let-7c	Homo sapiens	472	880	472	876	0	0	0	0	63	69	949
946.00	mir-26a-1	Homo sapiens	646	936	0	0	0	0	0	0	8	10	946
945.00	let-7f-2	Homo sapiens	157	918	0	59	0	0	0	0	26	27	945
907.00	mir-29a	Homo sapiens	0	0	0	0	24	769	24	769	122	138	907
896.00	let-7f-1	Homo sapiens	157	863	0	2	0	2	0	2	28	31	896
841.00	mir-22	Homo sapiens	0	75	0	75	325	719	325	719	44	47	841
809.00	mir-30a	Homo sapiens	200	670	200	670	24	93	24	93	34	46	809
790.00	mir-429	Homo sapiens	0	0	0	0	300	780	300	780	9	10	790
702.00	let-7a-3	Homo sapiens	81	645	0	4	0	9	0	0	35	48	702
694.00	let-7a-1	Homo sapiens	82	637	0	0	0	13	0	0	30	44	694
679.00	let-7a-2	Homo sapiens	82	635	0	0	0	0	0	0	30	44	679
669.00	mir-320a	Homo sapiens	0	0	0	0	245	660	245	641	1	9	669
548.00	mir-203b	Homo sapiens	1	547	1	547	0	1	0	1	0	0	548
461.00	mir-449c	Homo sapiens	40	458	40	458	0	0	0	0	3	3	461
439.00	mir-100	Homo sapiens	1	431	1	424	0	0	0	0	6	8	439
425.00	mir-141	Homo sapiens	0	10	0	10	0	359	0	342	53	56	425
422.00	mir-191	Homo sapiens	205	396	205	396	0	0	0	0	22	26	422
403.00	mir-222	Homo sapiens	0	0	0	0	195	387	195	387	7	16	403
390.00	mir-449a	Homo sapiens	218	367	218	359	0	0	0	0	15	23	390
381.00	mir-1180	Homo sapiens	0	0	0	0	187	364	187	364	14	17	381
369.00	mir-10400	Homo sapiens	0	369	0	369	0	0	0	0	0	0	369
369.00	mir-205	Homo sapiens	81	358	81	358	0	0	0	0	5	11	369
359.00	mir-3960	Homo sapiens	0	0	0	0	0	34	0	34	0	325	359
324.00	mir-25	Homo sapiens	2	5	2	5	231	317	231	317	2	2	324
318.00	mir-34b	Homo sapiens	0	18	0	16	5	293	5	293	7	7	318
316.00	mir-146b	Homo sapiens	117	310	117	292	0	3	0	3	3	3	316
300.00	mir-99b	Homo sapiens	20	258	20	258	15	30	15	30	9	12	300
290.00	mir-26b	Homo sapiens	157	290	157	290	0	0	0	0	0	0	290
279.00	mir-181a-2	Homo sapiens	12	212	0	0	0	4	0	4	57	63	279
276.00	mir-181a-1	Homo sapiens	13	211	0	0	0	0	0	0	60	65	276
273.00	mir-186	Homo sapiens	72	266	72	266	0	0	0	0	5	7	273
263.00	mir-221	Homo sapiens	0	30	0	30	5	171	5	171	47	62	263
255.00	mir-183	Homo sapiens	108	255	108	255	0	0	0	0	0	0	255
248.00	mir-182	Homo sapiens	37	198	37	198	0	3	0	3	41	47	248
235.00	mir-125a	Homo sapiens	5	190	5	190	0	9	0	9	26	36	235
229.00	mir-30e	Homo sapiens	27	143	27	142	14	62	14	61	19	24	229
208.00	mir-2110	Homo sapiens	15	172	15	172	0	0	0	0	14	36	208
184.00	mir-224	Homo sapiens	0	118	0	118	0	0	0	0	56	66	184
184.00	mir-28	Homo sapiens	3	56	3	56	56	117	56	117	7	11	184
184.00	mir-148b	Homo sapiens	0	9	0	9	80	173	80	145	0	2	184
167.00	mir-361	Homo sapiens	2	8	2	8	10	151	10	151	8	8	167
158.00	mir-378a	Homo sapiens	0	0	0	0	2	158	2	158	0	0	158
155.00	mir-128-1	Homo sapiens	0	0	0	0	66	155	0	26	0	0	155
131.00	mir-125b-1	Homo sapiens	19	98	0	0	0	9	0	9	23	24	131
129.00	mir-125b-2	Homo sapiens	19	95	0	0	0	8	0	8	23	26	129
128.00	let-7d	Homo sapiens	0	106	0	105	0	15	0	15	5	7	128
126.00	mir-192	Homo sapiens	25	81	25	81	0	0	0	0	33	45	126
126.00	mir-128-2	Homo sapiens	0	0	0	0	66	126	0	2	0	0	126
123.00	mir-8072	Homo sapiens	0	0	0	0	0	0	0	0	0	123	123
113.00	mir-190b	Homo sapiens	40	113	40	113	0	0	0	0	0	0	113
106.00	mir-340	Homo sapiens	48	94	48	94	0	11	0	11	1	1	106
105.00	mir-101-1	Homo sapiens	0	0	0	0	19	100	0	1	3	5	105
104.00	mir-140	Homo sapiens	11	15	11	15	22	79	22	79	6	10	104
101.00	mir-101-2	Homo sapiens	0	0	0	0	18	97	0	5	3	4	101
98.00	mir-142	Homo sapiens	1	4	1	4	0	8	0	8	71	86	98
93.00	mir-3184	Homo sapiens	0	21	0	21	0	0	0	0	61	72	93
87.00	mir-92a-1	Homo sapiens	1	1	1	1	22	86	0	13	0	0	87
85.00	mir-532	Homo sapiens	62	82	62	82	2	3	2	3	0	0	85
83.00	mir-342	Homo sapiens	17	53	17	53	3	23	3	23	6	7	83
77.00	mir-744	Homo sapiens	11	74	11	74	0	0	0	0	0	3	77
74.00	mir-152	Homo sapiens	0	0	0	0	21	74	21	74	0	0	74
69.00	mir-92a-2	Homo sapiens	0	0	0	0	23	68	0	1	0	1	69
62.00	mir-9-1	Homo sapiens	2	28	0	0	1	3	0	0	24	31	62
59.00	mir-9-2	Homo sapiens	2	28	0	0	0	2	0	0	24	29	59
55.00	mir-9-3	Homo sapiens	3	25	0	0	1	2	0	0	23	28	55
54.00	mir-98	Homo sapiens	26	46	26	46	0	0	0	0	7	8	54
54.00	mir-24-2	Homo sapiens	0	16	0	16	0	36	0	0	2	2	54
53.00	mir-184	Homo sapiens	0	0	0	0	34	46	34	46	6	7	53
52.00	mir-181b-1	Homo sapiens	7	21	0	0	0	2	0	2	25	29	52
49.00	mir-218-2	Homo sapiens	23	47	0	0	0	0	0	0	0	2	49
49.00	mir-1843	Homo sapiens	0	45	0	45	0	0	0	0	1	4	49
49.00	mir-16-2	Homo sapiens	10	31	0	0	0	13	0	13	5	5	49
49.00	mir-181b-2	Homo sapiens	6	21	0	0	0	0	0	0	22	28	49
48.00	mir-7706	Homo sapiens	0	0	0	0	3	40	3	40	4	8	48
45.00	mir-218-1	Homo sapiens	23	44	0	0	0	0	0	0	0	1	45
45.00	mir-1307	Homo sapiens	4	4	4	4	0	41	0	41	0	0	45
45.00	mir-3159	Homo sapiens	0	0	0	0	0	0	0	0	11	45	45
42.00	mir-24-1	Homo sapiens	0	4	0	4	0	36	0	0	2	2	42
41.00	mir-501	Homo sapiens	0	0	0	0	0	41	0	41	0	0	41
39.00	mir-574	Homo sapiens	0	1	0	1	10	20	10	20	9	18	39
38.00	mir-135b	Homo sapiens	26	38	26	38	0	0	0	0	0	0	38
38.00	mir-628	Homo sapiens	7	9	7	9	3	29	3	29	0	0	38
38.00	mir-8086	Homo sapiens	0	0	0	0	0	0	0	0	6	38	38
37.00	mir-155	Homo sapiens	0	32	0	32	0	0	0	0	4	5	37
37.00	mir-132	Homo sapiens	0	14	0	14	3	12	3	12	10	11	37
37.00	mir-328	Homo sapiens	0	0	0	0	24	37	24	37	0	0	37
35.00	mir-425	Homo sapiens	2	29	2	29	0	0	0	0	5	6	35
35.00	mir-23b	Homo sapiens	1	10	1	10	0	12	0	12	10	13	35
33.00	mir-499a	Homo sapiens	5	33	5	33	0	0	0	0	0	0	33
33.00	mir-29b-1	Homo sapiens	0	0	0	0	3	20	0	0	11	13	33
32.00	mir-7-3	Homo sapiens	11	22	0	0	0	0	0	0	8	10	32
32.00	mir-23a	Homo sapiens	0	2	0	2	0	27	0	27	3	3	32
32.00	mir-106b	Homo sapiens	0	1	0	1	4	24	4	24	7	7	32
32.00	mir-29b-2	Homo sapiens	0	0	0	0	3	18	0	0	11	14	32
32.00	mir-3615	Homo sapiens	0	0	0	0	0	32	0	32	0	0	32
31.00	mir-4446	Homo sapiens	0	0	0	0	5	29	5	29	2	2	31
30.00	mir-7-2	Homo sapiens	11	23	0	0	0	0	0	0	7	7	30
30.00	mir-7-1	Homo sapiens	11	18	0	0	0	2	0	2	8	10	30
29.00	mir-1246	Homo sapiens	2	29	2	29	0	0	0	0	0	0	29
29.00	let-7e	Homo sapiens	1	25	1	24	0	0	0	0	3	4	29
28.00	mir-103b-2	Homo sapiens	7	25	0	0	0	0	0	0	3	3	28
27.00	mir-16-1	Homo sapiens	11	27	0	0	0	0	0	0	0	0	27
27.00	mir-150	Homo sapiens	11	25	11	25	0	2	0	2	0	0	27
27.00	mir-103b-1	Homo sapiens	8	25	0	0	0	0	0	0	2	2	27
27.00	mir-30c-2	Homo sapiens	8	15	0	0	0	2	0	2	7	10	27
27.00	mir-1285-1	Homo sapiens	0	1	0	1	0	1	0	0	2	25	27
25.00	mir-345	Homo sapiens	7	25	7	25	0	0	0	0	0	0	25
25.00	mir-449b	Homo sapiens	4	21	4	12	1	4	1	4	0	0	25
25.00	mir-30c-1	Homo sapiens	9	14	0	0	0	1	0	1	7	10	25
25.00	mir-708	Homo sapiens	2	3	2	3	0	20	0	20	2	2	25
25.00	mir-95	Homo sapiens	0	0	0	0	0	25	0	25	0	0	25
23.00	mir-769	Homo sapiens	12	22	12	22	0	0	0	0	1	1	23
23.00	mir-29c	Homo sapiens	0	5	0	5	1	17	1	14	1	1	23
22.00	mir-619	Homo sapiens	0	6	0	6	0	0	0	0	1	16	22
21.00	mir-320b-1	Homo sapiens	0	0	0	0	0	21	0	0	0	0	21
21.00	mir-7851	Homo sapiens	0	0	0	0	0	0	0	0	0	21	21
20.00	mir-96	Homo sapiens	12	20	12	20	0	0	0	0	0	0	20
20.00	mir-4485	Homo sapiens	0	0	0	0	0	5	0	5	6	15	20
19.00	mir-484	Homo sapiens	11	19	11	19	0	0	0	0	0	0	19
19.00	mir-363	Homo sapiens	0	0	0	0	11	19	11	19	0	0	19
19.00	mir-320b-2	Homo sapiens	0	0	0	0	0	19	0	0	0	0	19
19.00	mir-760	Homo sapiens	0	0	0	0	0	19	0	19	0	0	19
18.00	mir-642b	Homo sapiens	9	18	9	18	0	0	0	0	0	0	18
18.00	mir-10399	Homo sapiens	3	3	3	3	2	12	2	12	3	3	18
17.00	mir-374a	Homo sapiens	5	16	5	16	0	1	0	1	0	0	17
17.00	mir-6510	Homo sapiens	0	0	0	0	5	17	5	17	0	0	17
17.00	mir-10395	Homo sapiens	0	0	0	0	3	17	3	17	0	0	17
16.00	mir-339	Homo sapiens	2	7	2	7	0	8	0	8	1	1	16
15.00	mir-330	Homo sapiens	0	3	0	3	0	9	0	9	0	3	15
14.00	mir-32	Homo sapiens	12	13	12	13	0	1	0	1	0	0	14
14.00	mir-1299	Homo sapiens	0	0	0	0	1	10	1	10	4	4	14
13.00	mir-20a	Homo sapiens	10	13	10	13	0	0	0	0	0	0	13
13.00	mir-193a	Homo sapiens	2	13	2	13	0	0	0	0	0	0	13
13.00	mir-629	Homo sapiens	7	13	7	13	0	0	0	0	0	0	13
13.00	mir-378i	Homo sapiens	0	13	0	13	0	0	0	0	0	0	13
13.00	mir-3929	Homo sapiens	0	0	0	0	0	0	0	0	0	13	13
12.00	mir-15b	Homo sapiens	4	4	4	4	2	7	2	7	1	1	12
12.00	mir-1273h	Homo sapiens	0	1	0	1	0	0	0	0	3	11	12
12.00	mir-210	Homo sapiens	0	0	0	0	0	11	0	11	0	1	12
12.00	mir-1301	Homo sapiens	0	0	0	0	4	7	4	7	4	5	12
12.00	mir-941-2	Homo sapiens	0	0	0	0	5	12	0	0	0	0	12
12.00	mir-941-3	Homo sapiens	0	0	0	0	6	12	0	0	0	0	12
12.00	mir-1269a	Homo sapiens	0	0	0	0	1	12	1	12	0	0	12
12.00	mir-3648-1	Homo sapiens	0	0	0	0	0	0	0	0	11	12	12
12.00	mir-3648-2	Homo sapiens	0	0	0	0	0	0	0	0	9	12	12
11.00	mir-31	Homo sapiens	0	11	0	11	0	0	0	0	0	0	11
11.00	mir-185	Homo sapiens	0	11	0	11	0	0	0	0	0	0	11
11.00	mir-181d	Homo sapiens	1	6	1	6	0	0	0	0	5	5	11
11.00	mir-941-1	Homo sapiens	0	0	0	0	6	11	0	0	0	0	11
11.00	mir-941-4	Homo sapiens	0	0	0	0	5	11	0	0	0	0	11
11.00	mir-1290	Homo sapiens	0	0	0	0	0	8	0	8	0	3	11
11.00	mir-4430	Homo sapiens	0	0	0	0	0	0	0	0	0	11	11
11.00	mir-5684	Homo sapiens	0	0	0	0	0	0	0	0	0	11	11
11.00	mir-7110	Homo sapiens	0	0	0	0	0	0	0	0	2	11	11
11.00	mir-941-5	Homo sapiens	0	0	0	0	6	11	0	0	0	0	11
10.00	mir-10a	Homo sapiens	0	10	0	10	0	0	0	0	0	0	10
10.00	mir-30b	Homo sapiens	3	8	3	8	0	0	0	0	2	2	10
10.00	mir-3529	Homo sapiens	0	0	0	0	0	0	0	0	8	10	10
9.00	mir-486-1	Homo sapiens	0	9	0	3	0	0	0	0	0	0	9
9.00	mir-511	Homo sapiens	3	9	3	9	0	0	0	0	0	0	9
9.00	mir-374b	Homo sapiens	1	9	1	8	0	0	0	0	0	0	9
9.00	mir-34a	Homo sapiens	0	7	0	7	0	0	0	0	2	2	9
9.00	mir-149	Homo sapiens	0	5	0	5	0	0	0	0	4	4	9
9.00	mir-335	Homo sapiens	0	2	0	2	0	7	0	7	0	0	9
9.00	mir-452	Homo sapiens	0	0	0	0	0	0	0	0	8	9	9
9.00	mir-652	Homo sapiens	0	0	0	0	4	9	4	9	0	0	9
9.00	mir-3665	Homo sapiens	0	0	0	0	0	0	0	0	0	9	9
8.00	mir-194-1	Homo sapiens	0	8	0	0	0	0	0	0	0	0	8
8.00	mir-194-2	Homo sapiens	0	8	0	1	0	0	0	0	0	0	8
8.00	mir-3158-2	Homo sapiens	0	8	0	0	0	0	0	0	0	0	8
8.00	mir-3135b	Homo sapiens	0	2	0	2	0	0	0	0	0	6	8
8.00	mir-223	Homo sapiens	0	1	0	1	2	7	2	7	0	0	8
8.00	mir-130a	Homo sapiens	0	0	0	0	0	8	0	8	0	0	8
8.00	mir-3135a	Homo sapiens	0	0	0	0	0	0	0	0	0	8	8
7.00	mir-1287	Homo sapiens	2	7	2	7	0	0	0	0	0	0	7
7.00	mir-3158-1	Homo sapiens	0	7	0	0	0	0	0	0	0	0	7
7.00	mir-7704	Homo sapiens	0	7	0	7	0	0	0	0	0	0	7
7.00	mir-671	Homo sapiens	0	0	0	0	2	7	2	7	0	0	7
6.00	mir-204	Homo sapiens	0	6	0	6	0	0	0	0	0	0	6
6.00	mir-455	Homo sapiens	0	6	0	6	0	0	0	0	0	0	6
6.00	mir-625	Homo sapiens	0	6	0	6	0	0	0	0	0	0	6
6.00	mir-3913-1	Homo sapiens	0	6	0	0	0	0	0	0	0	0	6
6.00	mir-9985	Homo sapiens	0	6	0	6	0	0	0	0	0	0	6
6.00	mir-3913-2	Homo sapiens	0	5	0	0	0	0	0	0	0	1	6
6.00	mir-12136	Homo sapiens	0	3	0	3	0	0	0	0	3	3	6
6.00	mir-1303	Homo sapiens	0	0	0	0	1	3	1	3	1	3	6
5.00	mir-17	Homo sapiens	0	5	0	5	0	0	0	0	0	0	5
5.00	mir-193b	Homo sapiens	2	5	2	5	0	0	0	0	0	0	5
5.00	mir-589	Homo sapiens	0	5	0	5	0	0	0	0	0	0	5
5.00	mir-651	Homo sapiens	1	5	1	5	0	0	0	0	0	0	5
5.00	mir-548az	Homo sapiens	0	5	0	5	0	0	0	0	0	0	5
5.00	mir-486-2	Homo sapiens	0	5	0	0	0	0	0	0	0	0	5
5.00	mir-147b	Homo sapiens	1	1	1	1	0	4	0	4	0	0	5
5.00	mir-143	Homo sapiens	0	0	0	0	2	5	2	5	0	0	5
5.00	mir-324	Homo sapiens	0	0	0	0	0	4	0	4	0	1	5
5.00	mir-1295a	Homo sapiens	0	0	0	0	2	3	2	3	2	2	5
5.00	mir-4472-2	Homo sapiens	0	0	0	0	0	0	0	0	0	5	5
4.00	mir-642a	Homo sapiens	3	4	3	4	0	0	0	0	0	0	4
4.00	mir-659	Homo sapiens	4	4	4	4	0	0	0	0	0	0	4
4.00	mir-660	Homo sapiens	2	4	2	4	0	0	0	0	0	0	4
4.00	mir-203a	Homo sapiens	0	0	0	0	0	4	0	4	0	0	4
4.00	mir-320c-2	Homo sapiens	0	0	0	0	1	4	0	0	0	0	4
4.00	mir-6842	Homo sapiens	0	0	0	0	3	4	3	4	0	0	4
3.00	mir-15a	Homo sapiens	0	3	0	3	0	0	0	0	0	0	3
3.00	mir-199b	Homo sapiens	1	3	1	3	0	0	0	0	0	0	3
3.00	mir-3180-4	Homo sapiens	0	3	0	0	0	0	0	0	0	0	3
3.00	mir-6877	Homo sapiens	0	3	0	3	0	0	0	0	0	0	3
3.00	mir-296	Homo sapiens	1	1	1	1	0	2	0	2	0	0	3
3.00	mir-1292	Homo sapiens	1	1	1	1	0	0	0	0	1	2	3
3.00	mir-4516	Homo sapiens	0	1	0	1	0	0	0	0	2	2	3
3.00	mir-19b-1	Homo sapiens	0	0	0	0	0	3	0	0	0	0	3
3.00	mir-103a-2	Homo sapiens	0	0	0	0	0	0	0	0	3	3	3
3.00	mir-153-1	Homo sapiens	0	0	0	0	1	3	0	0	0	0	3
3.00	mir-502	Homo sapiens	0	0	0	0	0	3	0	3	0	0	3
3.00	mir-582	Homo sapiens	0	0	0	0	0	2	0	2	1	1	3
3.00	mir-320c-1	Homo sapiens	0	0	0	0	0	3	0	0	0	0	3
3.00	mir-874	Homo sapiens	0	0	0	0	0	3	0	3	0	0	3
3.00	mir-1285-2	Homo sapiens	0	0	0	0	0	0	0	0	0	3	3
3.00	mir-1268a	Homo sapiens	0	0	0	0	0	0	0	0	0	3	3
3.00	mir-3177	Homo sapiens	0	0	0	0	3	3	3	3	0	0	3
3.00	mir-3605	Homo sapiens	0	0	0	0	0	3	0	3	0	0	3
3.00	mir-6515	Homo sapiens	0	0	0	0	0	0	0	0	3	3	3
2.00	mir-331	Homo sapiens	0	2	0	2	0	0	0	0	0	0	2
2.00	mir-504	Homo sapiens	0	2	0	2	0	0	0	0	0	0	2
2.00	mir-1293	Homo sapiens	0	2	0	2	0	0	0	0	0	0	2
2.00	mir-1262	Homo sapiens	1	2	1	2	0	0	0	0	0	0	2
2.00	mir-2277	Homo sapiens	2	2	2	2	0	0	0	0	0	0	2
2.00	mir-3664	Homo sapiens	0	2	0	2	0	0	0	0	0	0	2
2.00	mir-4429	Homo sapiens	0	2	0	2	0	0	0	0	0	0	2
2.00	mir-4667	Homo sapiens	0	2	0	2	0	0	0	0	0	0	2
2.00	mir-6855	Homo sapiens	0	2	0	2	0	0	0	0	0	0	2
2.00	mir-19b-2	Homo sapiens	0	0	0	0	0	2	0	0	0	0	2
2.00	mir-103a-1	Homo sapiens	0	0	0	0	0	0	0	0	2	2	2
2.00	mir-107	Homo sapiens	0	0	0	0	0	0	0	0	2	2	2
2.00	mir-153-2	Homo sapiens	0	0	0	0	1	2	0	0	0	0	2
2.00	mir-643	Homo sapiens	0	0	0	0	2	2	2	2	0	0	2
2.00	mir-944	Homo sapiens	0	0	0	0	0	2	0	2	0	0	2
2.00	mir-548o	Homo sapiens	0	0	0	0	2	2	0	0	0	0	2
2.00	mir-664a	Homo sapiens	0	0	0	0	0	1	0	1	0	1	2
2.00	mir-548u	Homo sapiens	0	0	0	0	0	2	0	2	0	0	2
2.00	mir-1273c	Homo sapiens	0	0	0	0	0	0	0	0	0	2	2
2.00	mir-3195	Homo sapiens	0	0	0	0	0	0	0	0	0	2	2
2.00	mir-676	Homo sapiens	0	0	0	0	0	2	0	2	0	0	2
2.00	mir-548o-2	Homo sapiens	0	0	0	0	2	2	0	0	0	0	2
2.00	mir-378f	Homo sapiens	0	0	0	0	0	1	0	1	0	1	2
2.00	mir-4473	Homo sapiens	0	0	0	0	0	2	0	2	0	0	2
2.00	mir-4512	Homo sapiens	0	0	0	0	0	0	0	0	0	2	2
2.00	mir-5588	Homo sapiens	0	0	0	0	0	0	0	0	1	2	2
2.00	mir-6131	Homo sapiens	0	0	0	0	0	2	0	2	0	0	2
2.00	mir-6503	Homo sapiens	0	0	0	0	0	2	0	2	0	0	2
2.00	mir-6733	Homo sapiens	0	0	0	0	2	2	2	2	0	0	2
2.00	mir-7854	Homo sapiens	0	0	0	0	0	2	0	2	0	0	2
2.00	mir-10396b	Homo sapiens	0	0	0	0	0	0	0	0	2	2	2
1.00	mir-129-2	Homo sapiens	0	1	0	0	0	0	0	0	0	0	1
1.00	mir-338	Homo sapiens	0	1	0	1	0	0	0	0	0	0	1
1.00	mir-451a	Homo sapiens	0	1	0	1	0	0	0	0	0	0	1
1.00	mir-505	Homo sapiens	0	1	0	1	0	0	0	0	0	0	1
1.00	mir-570	Homo sapiens	0	1	0	0	0	0	0	0	0	0	1
1.00	mir-548b	Homo sapiens	0	1	0	1	0	0	0	0	0	0	1
1.00	mir-618	Homo sapiens	1	1	1	1	0	0	0	0	0	0	1
1.00	mir-33b	Homo sapiens	0	1	0	1	0	0	0	0	0	0	1
1.00	mir-548d-2	Homo sapiens	0	1	0	0	0	0	0	0	0	0	1
1.00	mir-454	Homo sapiens	0	1	0	1	0	0	0	0	0	0	1
1.00	mir-509-3	Homo sapiens	0	1	0	1	0	0	0	0	0	0	1
1.00	mir-548i-3	Homo sapiens	1	1	0	0	0	0	0	0	0	0	1
1.00	mir-3613	Homo sapiens	0	1	0	1	0	0	0	0	0	0	1
1.00	mir-3180-5	Homo sapiens	0	1	0	0	0	0	0	0	0	0	1
1.00	mir-3911	Homo sapiens	0	1	0	1	0	0	0	0	0	0	1
1.00	mir-4423	Homo sapiens	1	1	1	1	0	0	0	0	0	0	1
1.00	mir-4661	Homo sapiens	0	1	0	1	0	0	0	0	0	0	1
1.00	mir-4775	Homo sapiens	0	1	0	1	0	0	0	0	0	0	1
1.00	mir-4776-2	Homo sapiens	0	1	0	0	0	0	0	0	0	0	1
1.00	mir-6773	Homo sapiens	0	1	0	1	0	0	0	0	0	0	1
1.00	mir-6814	Homo sapiens	0	1	0	1	0	0	0	0	0	0	1
1.00	mir-4433b	Homo sapiens	1	1	1	1	0	0	0	0	0	0	1
1.00	mir-7856	Homo sapiens	0	1	0	1	0	0	0	0	0	0	1
1.00	mir-93	Homo sapiens	0	0	0	0	1	1	1	1	0	0	1
1.00	mir-197	Homo sapiens	0	0	0	0	1	1	1	1	0	0	1
1.00	mir-199a-1	Homo sapiens	0	0	0	0	0	1	0	0	0	0	1
1.00	mir-187	Homo sapiens	0	0	0	0	0	1	0	1	0	0	1
1.00	mir-199a-2	Homo sapiens	0	0	0	0	0	1	0	0	0	0	1
1.00	mir-1-2	Homo sapiens	0	0	0	0	0	1	0	0	0	0	1
1.00	mir-126	Homo sapiens	0	0	0	0	1	1	1	1	0	0	1
1.00	mir-1-1	Homo sapiens	0	0	0	0	0	1	0	0	0	0	1
1.00	mir-130b	Homo sapiens	0	0	0	0	0	1	0	1	0	0	1
1.00	mir-500a	Homo sapiens	0	0	0	0	1	1	1	1	0	0	1
1.00	mir-508	Homo sapiens	0	0	0	0	0	0	0	0	1	1	1
1.00	mir-514a-1	Homo sapiens	0	0	0	0	1	1	0	0	0	0	1
1.00	mir-514a-2	Homo sapiens	0	0	0	0	1	1	0	0	0	0	1
1.00	mir-514a-3	Homo sapiens	0	0	0	0	1	1	0	0	0	0	1
1.00	mir-576	Homo sapiens	0	0	0	0	0	1	0	1	0	0	1
1.00	mir-584	Homo sapiens	0	0	0	0	0	0	0	0	0	1	1
1.00	mir-590	Homo sapiens	0	0	0	0	1	1	1	1	0	0	1
1.00	mir-598	Homo sapiens	0	0	0	0	0	0	0	0	0	1	1
1.00	mir-421	Homo sapiens	0	0	0	0	0	1	0	1	0	0	1
1.00	mir-873	Homo sapiens	0	0	0	0	0	0	0	0	1	1	1
1.00	mir-663b	Homo sapiens	0	0	0	0	0	0	0	0	0	1	1
1.00	mir-1288	Homo sapiens	0	0	0	0	1	1	1	1	0	0	1
1.00	mir-320d-1	Homo sapiens	0	0	0	0	0	1	0	1	0	0	1
1.00	mir-1910	Homo sapiens	0	0	0	0	0	0	0	0	0	1	1
1.00	mir-4284	Homo sapiens	0	0	0	0	0	0	0	0	0	1	1
1.00	mir-3614	Homo sapiens	0	0	0	0	0	0	0	0	0	1	1
1.00	mir-3908	Homo sapiens	0	0	0	0	0	0	0	0	0	1	1
1.00	mir-3909	Homo sapiens	0	0	0	0	1	1	1	1	0	0	1
1.00	mir-1268b	Homo sapiens	0	0	0	0	0	0	0	0	0	1	1
1.00	mir-4449	Homo sapiens	0	0	0	0	0	0	0	0	1	1	1
1.00	mir-4452	Homo sapiens	0	0	0	0	0	0	0	0	0	1	1
1.00	mir-4474	Homo sapiens	0	0	0	0	0	1	0	1	0	0	1
1.00	mir-4640	Homo sapiens	0	0	0	0	0	1	0	1	0	0	1
1.00	mir-4664	Homo sapiens	0	0	0	0	0	1	0	1	0	0	1
1.00	mir-4728	Homo sapiens	0	0	0	0	0	0	0	0	1	1	1
1.00	mir-4776-1	Homo sapiens	0	0	0	0	0	0	0	0	1	1	1
1.00	mir-5585	Homo sapiens	0	0	0	0	0	0	0	0	0	1	1
1.00	mir-5692c-2	Homo sapiens	0	0	0	0	0	0	0	0	0	1	1
1.00	mir-6127	Homo sapiens	0	0	0	0	0	0	0	0	1	1	1
1.00	mir-6787	Homo sapiens	0	0	0	0	0	1	0	1	0	0	1
1.00	mir-6808	Homo sapiens	0	0	0	0	0	1	0	1	0	0	1
1.00	mir-7705	Homo sapiens	0	0	0	0	0	0	0	0	1	1	1
1.00	mir-9902-1	Homo sapiens	0	0	0	0	0	0	0	0	0	1	1
1.00	mir-9903	Homo sapiens	0	0	0	0	0	1	0	1	0	0	1
1.00	mir-10396a	Homo sapiens	0	0	0	0	0	0	0	0	1	1	1
0.00	mir-129-1	Homo sapiens	0	0	0	0	0	0	0	0	0	0	0
0.00	mir-548d-1	Homo sapiens	0	0	0	0	0	0	0	0	0	0	0
0.00	mir-548i-1	Homo sapiens	0	0	0	0	0	0	0	0	0	0	0
0.00	mir-548i-2	Homo sapiens	0	0	0	0	0	0	0	0	0	0	0
0.00	mir-548i-4	Homo sapiens	0	0	0	0	0	0	0	0	0	0	0
0.00	mir-548ai	Homo sapiens	0	0	0	0	0	0	0	0	0	0	0
0.00	mir-548ar	Homo sapiens	0	0	0	0	0	0	0	0	0	0	0
0.00	mir-9902-2	Homo sapiens	0	0	0	0	0	0	0	0	0	0	0

## Sheet: F11
Expression values	Name	Resource	Exact mature 5'	Mature 5'	Unique exact mature 5'	Unique mature 5'	Exact mature 3'	Mature 3'	Unique exact mature 3'	Unique mature 3'	Exact other	Other	Total
22,387.00	mir-148a	Homo sapiens	13	23	13	23	17965	22257	17965	22220	97	107	22387
11,753.00	mir-21	Homo sapiens	3661	11466	3661	11466	1	2	1	2	219	285	11753
8,227.00	mir-200a	Homo sapiens	154	324	154	324	5	7830	5	7817	66	73	8227
6,134.00	mir-34c	Homo sapiens	789	5084	789	5082	70	127	70	127	846	923	6134
4,142.00	mir-200b	Homo sapiens	28	73	28	73	347	4052	347	4041	9	17	4142
3,781.00	mir-99a	Homo sapiens	54	3753	54	3749	0	0	0	0	26	28	3781
3,526.00	mir-27b	Homo sapiens	0	2	0	2	211	3511	211	3466	2	13	3526
3,067.00	let-7b	Homo sapiens	956	2644	956	2639	0	0	0	0	378	423	3067
3,065.00	mir-151a	Homo sapiens	350	550	350	550	1300	2498	1300	2498	8	17	3065
2,506.00	let-7i	Homo sapiens	1710	2426	1710	2420	0	0	0	0	67	80	2506
2,283.00	mir-27a	Homo sapiens	3	8	3	8	22	2275	22	2227	0	0	2283
2,201.00	mir-200c	Homo sapiens	0	1	0	1	680	2138	680	2126	53	62	2201
1,541.00	mir-30d	Homo sapiens	266	1476	266	1475	1	3	1	3	50	62	1541
1,405.00	let-7g	Homo sapiens	351	1376	351	1368	0	0	0	0	23	29	1405
1,135.00	mir-26a-2	Homo sapiens	789	1130	0	0	0	0	0	0	5	5	1135
1,132.00	mir-26a-1	Homo sapiens	789	1125	0	0	0	0	0	0	6	7	1132
1,084.00	mir-375	Homo sapiens	0	0	0	0	253	989	253	989	73	95	1084
964.00	let-7f-2	Homo sapiens	121	937	0	65	0	0	0	0	25	27	964
903.00	let-7f-1	Homo sapiens	121	875	0	3	0	2	0	2	26	26	903
890.00	mir-146a	Homo sapiens	252	889	252	870	0	0	0	0	1	1	890
874.00	mir-3074	Homo sapiens	0	853	0	853	0	21	0	21	0	0	874
831.00	mir-22	Homo sapiens	0	68	0	68	364	703	364	703	54	60	831
770.00	mir-30a	Homo sapiens	136	565	136	562	30	137	30	131	52	68	770
765.00	let-7c	Homo sapiens	391	724	391	715	0	0	0	0	31	41	765
764.00	let-7a-1	Homo sapiens	69	700	0	0	0	6	0	0	37	58	764
762.00	let-7a-3	Homo sapiens	68	698	0	1	1	7	0	0	35	57	762
744.00	let-7a-2	Homo sapiens	68	690	0	0	0	0	0	0	35	54	744
595.00	mir-203b	Homo sapiens	0	593	0	593	0	2	0	2	0	0	595
586.00	mir-92b	Homo sapiens	0	5	0	5	115	518	115	511	32	63	586
542.00	mir-29a	Homo sapiens	0	0	0	0	15	459	15	459	69	83	542
538.00	mir-429	Homo sapiens	0	0	0	0	233	529	233	529	8	9	538
518.00	mir-205	Homo sapiens	97	505	97	505	0	2	0	2	6	11	518
516.00	mir-423	Homo sapiens	139	355	139	355	61	124	61	124	34	37	516
493.00	mir-100	Homo sapiens	15	485	15	481	0	0	0	0	8	8	493
325.00	mir-25	Homo sapiens	0	0	0	0	195	321	195	321	2	4	325
305.00	mir-222	Homo sapiens	0	0	0	0	115	279	115	279	19	26	305
293.00	mir-183	Homo sapiens	142	292	142	292	0	0	0	0	0	1	293
275.00	mir-141	Homo sapiens	0	2	0	2	0	236	0	224	36	37	275
272.00	mir-146b	Homo sapiens	94	271	94	255	0	1	0	1	0	0	272
260.00	mir-26b	Homo sapiens	106	260	106	260	0	0	0	0	0	0	260
252.00	mir-30e	Homo sapiens	18	133	18	132	23	79	23	74	28	40	252
249.00	mir-449a	Homo sapiens	165	230	165	218	0	0	0	0	13	19	249
248.00	mir-148b	Homo sapiens	0	1	0	1	106	242	106	194	5	5	248
233.00	mir-34b	Homo sapiens	0	7	0	5	1	222	1	222	4	4	233
232.00	mir-99b	Homo sapiens	35	199	35	199	13	26	13	26	5	7	232
232.00	mir-125a	Homo sapiens	5	187	5	187	0	6	0	6	33	39	232
228.00	mir-191	Homo sapiens	103	213	103	213	0	0	0	0	12	15	228
206.00	mir-182	Homo sapiens	21	156	21	156	0	2	0	2	40	48	206
190.00	mir-224	Homo sapiens	0	137	0	137	0	1	0	1	46	52	190
189.00	mir-378a	Homo sapiens	0	0	0	0	1	189	1	189	0	0	189
188.00	mir-181a-2	Homo sapiens	13	145	0	0	0	8	0	8	28	35	188
179.00	mir-181a-1	Homo sapiens	14	140	0	0	0	1	0	1	31	38	179
164.00	mir-128-1	Homo sapiens	0	0	0	0	58	164	0	41	0	0	164
164.00	mir-152	Homo sapiens	0	0	0	0	21	162	21	162	0	2	164
161.00	mir-320a	Homo sapiens	0	0	0	0	62	159	62	157	1	2	161
156.00	mir-28	Homo sapiens	5	80	5	80	18	73	18	73	1	3	156
155.00	mir-142	Homo sapiens	6	19	6	19	0	9	0	9	105	127	155
151.00	mir-449c	Homo sapiens	31	113	31	113	0	3	0	3	1	35	151
147.00	mir-101-2	Homo sapiens	0	0	0	0	22	144	0	19	2	3	147
142.00	mir-192	Homo sapiens	32	109	32	109	0	0	0	0	17	33	142
141.00	mir-221	Homo sapiens	1	26	1	26	11	88	11	88	23	27	141
136.00	mir-532	Homo sapiens	88	136	88	136	0	0	0	0	0	0	136
134.00	mir-101-1	Homo sapiens	0	0	0	0	22	130	0	0	2	4	134
130.00	mir-186	Homo sapiens	36	119	36	119	0	0	0	0	11	11	130
126.00	mir-128-2	Homo sapiens	0	0	0	0	58	126	0	2	0	0	126
122.00	mir-361	Homo sapiens	1	7	1	7	10	107	10	107	8	8	122
111.00	let-7d	Homo sapiens	0	103	0	99	0	4	0	4	2	4	111
110.00	mir-744	Homo sapiens	13	104	13	104	0	0	0	0	4	6	110
103.00	mir-1180	Homo sapiens	0	0	0	0	62	97	62	97	5	6	103
102.00	mir-140	Homo sapiens	1	6	1	6	14	73	14	73	8	23	102
91.00	mir-125b-2	Homo sapiens	16	75	0	0	0	4	0	4	12	12	91
90.00	mir-340	Homo sapiens	49	87	49	87	1	3	1	3	0	0	90
89.00	mir-125b-1	Homo sapiens	15	72	0	0	0	4	0	4	13	13	89
84.00	mir-98	Homo sapiens	38	63	38	62	0	0	0	0	13	21	84
80.00	mir-184	Homo sapiens	0	0	0	0	52	77	52	77	2	3	80
79.00	mir-2110	Homo sapiens	5	68	5	68	0	0	0	0	9	11	79
75.00	mir-23b	Homo sapiens	0	14	0	14	0	38	0	38	14	23	75
73.00	mir-143	Homo sapiens	0	0	0	0	45	73	45	73	0	0	73
65.00	mir-3184	Homo sapiens	0	24	0	24	0	0	0	0	37	41	65
62.00	mir-92a-1	Homo sapiens	0	0	0	0	24	61	0	7	0	1	62
59.00	mir-106b	Homo sapiens	1	7	1	7	8	37	8	37	10	15	59
58.00	mir-92a-2	Homo sapiens	0	0	0	0	24	56	0	1	0	2	58
56.00	mir-16-2	Homo sapiens	6	29	0	0	4	23	4	23	4	4	56
56.00	mir-23a	Homo sapiens	0	0	0	0	0	56	0	56	0	0	56
53.00	mir-135b	Homo sapiens	31	52	31	52	0	0	0	0	1	1	53
51.00	mir-190b	Homo sapiens	17	51	17	51	0	0	0	0	0	0	51
48.00	mir-24-2	Homo sapiens	0	12	0	12	0	33	0	0	3	3	48
45.00	mir-181b-1	Homo sapiens	7	19	0	0	0	0	0	0	21	26	45
42.00	mir-223	Homo sapiens	0	4	0	4	2	37	2	37	1	1	42
40.00	mir-181b-2	Homo sapiens	8	19	0	1	0	0	0	0	20	21	40
39.00	let-7e	Homo sapiens	0	37	0	32	0	0	0	0	1	2	39
39.00	mir-95	Homo sapiens	0	0	0	0	4	39	4	39	0	0	39
38.00	mir-8072	Homo sapiens	0	0	0	0	0	0	0	0	0	38	38
37.00	mir-769	Homo sapiens	17	37	17	37	0	0	0	0	0	0	37
33.00	mir-449b	Homo sapiens	7	27	7	16	3	6	3	6	0	0	33
32.00	mir-218-2	Homo sapiens	12	32	0	0	0	0	0	0	0	0	32
32.00	mir-149	Homo sapiens	0	15	0	15	0	0	0	0	10	17	32
31.00	mir-9-2	Homo sapiens	1	16	0	0	0	1	0	0	13	14	31
31.00	mir-9-1	Homo sapiens	0	13	0	0	0	4	0	0	13	14	31
30.00	mir-132	Homo sapiens	0	15	0	15	4	12	4	12	2	3	30
29.00	mir-378i	Homo sapiens	0	29	0	29	0	0	0	0	0	0	29
29.00	mir-9-3	Homo sapiens	0	14	0	0	0	1	0	0	12	14	29
28.00	mir-16-1	Homo sapiens	5	27	0	0	0	0	0	0	1	1	28
28.00	mir-1307	Homo sapiens	7	9	7	9	0	19	0	19	0	0	28
28.00	mir-24-1	Homo sapiens	0	1	0	1	0	27	0	0	0	0	28
27.00	mir-29b-2	Homo sapiens	0	0	0	0	2	16	0	0	9	11	27
26.00	mir-218-1	Homo sapiens	12	25	0	0	0	0	0	0	0	1	26
25.00	mir-29b-1	Homo sapiens	0	0	0	0	3	15	0	0	9	10	25
24.00	mir-32	Homo sapiens	8	22	8	22	0	2	0	2	0	0	24
23.00	mir-1843	Homo sapiens	0	23	0	23	0	0	0	0	0	0	23
23.00	mir-30b	Homo sapiens	9	21	9	21	0	0	0	0	1	2	23
23.00	mir-7-1	Homo sapiens	10	18	0	0	0	0	0	0	4	5	23
22.00	mir-30c-1	Homo sapiens	8	20	0	0	0	0	0	0	2	2	22
22.00	mir-30c-2	Homo sapiens	7	17	0	0	0	2	0	2	3	3	22
22.00	mir-574	Homo sapiens	0	1	0	1	9	13	9	13	5	8	22
21.00	mir-345	Homo sapiens	3	21	3	21	0	0	0	0	0	0	21
21.00	mir-155	Homo sapiens	0	18	0	18	0	0	0	0	2	3	21
21.00	mir-7-2	Homo sapiens	10	17	0	0	0	0	0	0	3	4	21
21.00	mir-7-3	Homo sapiens	10	16	0	0	0	0	0	0	3	5	21
20.00	mir-425	Homo sapiens	2	19	2	19	0	1	0	1	0	0	20
20.00	mir-103b-1	Homo sapiens	10	19	0	0	0	0	0	0	1	1	20
20.00	mir-3960	Homo sapiens	0	0	0	0	0	0	0	0	0	20	20
19.00	mir-10a	Homo sapiens	0	18	0	18	0	0	0	0	1	1	19
19.00	mir-342	Homo sapiens	1	12	1	12	2	7	2	7	0	0	19
19.00	mir-339	Homo sapiens	3	5	3	5	1	12	1	12	1	2	19
19.00	mir-3615	Homo sapiens	0	0	0	0	0	19	0	19	0	0	19
18.00	mir-10400	Homo sapiens	0	18	0	18	0	0	0	0	0	0	18
18.00	mir-628	Homo sapiens	4	8	4	8	1	6	1	6	3	4	18
18.00	mir-29c	Homo sapiens	0	5	0	5	3	11	3	10	2	2	18
17.00	mir-103b-2	Homo sapiens	9	16	0	0	0	0	0	0	1	1	17
17.00	mir-708	Homo sapiens	2	2	2	2	0	14	0	14	1	1	17
17.00	mir-501	Homo sapiens	0	0	0	0	0	17	0	17	0	0	17
17.00	mir-8086	Homo sapiens	0	0	0	0	0	0	0	0	2	17	17
16.00	mir-499a	Homo sapiens	3	16	3	16	0	0	0	0	0	0	16
16.00	mir-1246	Homo sapiens	0	15	0	15	0	0	0	0	0	1	16
16.00	mir-31	Homo sapiens	2	14	2	14	1	2	1	2	0	0	16
16.00	mir-452	Homo sapiens	0	5	0	5	0	0	0	0	9	11	16
16.00	mir-363	Homo sapiens	0	0	0	0	12	16	12	16	0	0	16
16.00	mir-6510	Homo sapiens	0	0	0	0	5	16	5	16	0	0	16
15.00	mir-150	Homo sapiens	11	15	11	15	0	0	0	0	0	0	15
13.00	mir-328	Homo sapiens	0	0	0	0	9	13	9	13	0	0	13
13.00	mir-582	Homo sapiens	0	0	0	0	4	12	4	12	1	1	13
13.00	mir-1301	Homo sapiens	0	0	0	0	0	7	0	7	4	6	13
12.00	mir-4446	Homo sapiens	0	0	0	0	4	12	4	12	0	0	12
11.00	mir-96	Homo sapiens	3	11	3	11	0	0	0	0	0	0	11
11.00	mir-194-2	Homo sapiens	0	11	0	0	0	0	0	0	0	0	11
11.00	mir-511	Homo sapiens	7	11	7	11	0	0	0	0	0	0	11
11.00	mir-1287	Homo sapiens	3	10	3	10	0	0	0	0	1	1	11
11.00	mir-204	Homo sapiens	4	9	4	9	0	0	0	0	2	2	11
11.00	mir-374a	Homo sapiens	1	9	1	9	1	1	1	1	1	1	11
11.00	mir-199b	Homo sapiens	1	8	1	8	0	3	0	0	0	0	11
11.00	mir-147b	Homo sapiens	0	0	0	0	0	11	0	11	0	0	11
11.00	mir-941-4	Homo sapiens	0	0	0	0	3	10	0	0	1	1	11
11.00	mir-1269a	Homo sapiens	0	0	0	0	3	10	3	10	1	1	11
10.00	mir-194-1	Homo sapiens	0	10	0	0	0	0	0	0	0	0	10
10.00	mir-589	Homo sapiens	0	10	0	10	0	0	0	0	0	0	10
10.00	mir-374b	Homo sapiens	4	10	4	10	0	0	0	0	0	0	10
10.00	mir-941-1	Homo sapiens	0	0	0	0	4	9	0	0	1	1	10
10.00	mir-941-3	Homo sapiens	0	0	0	0	4	10	0	0	0	0	10
10.00	mir-941-5	Homo sapiens	0	0	0	0	4	9	0	0	1	1	10
9.00	mir-629	Homo sapiens	6	9	6	9	0	0	0	0	0	0	9
9.00	mir-335	Homo sapiens	0	8	0	8	0	1	0	1	0	0	9
9.00	mir-625	Homo sapiens	0	7	0	7	0	2	0	2	0	0	9
9.00	mir-10399	Homo sapiens	1	1	1	1	0	5	0	5	2	3	9
9.00	mir-941-2	Homo sapiens	0	0	0	0	4	9	0	0	0	0	9
9.00	mir-1285-1	Homo sapiens	0	0	0	0	0	0	0	0	0	9	9
9.00	mir-4485	Homo sapiens	0	0	0	0	0	5	0	5	0	4	9
8.00	mir-20a	Homo sapiens	6	8	6	8	0	0	0	0	0	0	8
8.00	mir-181c	Homo sapiens	3	5	3	5	0	3	0	3	0	0	8
8.00	mir-4430	Homo sapiens	0	0	0	0	0	0	0	0	0	8	8
7.00	mir-193a	Homo sapiens	4	5	4	5	0	0	0	0	2	2	7
7.00	mir-619	Homo sapiens	0	5	0	5	0	0	0	0	0	2	7
7.00	mir-330	Homo sapiens	0	2	0	2	0	4	0	4	1	1	7
6.00	mir-651	Homo sapiens	1	6	1	6	0	0	0	0	0	0	6
6.00	mir-1269b	Homo sapiens	0	6	0	6	0	0	0	0	0	0	6
6.00	mir-199a-2	Homo sapiens	2	2	0	0	1	4	0	0	0	0	6
6.00	mir-210	Homo sapiens	0	0	0	0	1	6	1	6	0	0	6
6.00	mir-126	Homo sapiens	0	0	0	0	1	6	1	6	0	0	6
6.00	mir-502	Homo sapiens	0	0	0	0	0	6	0	6	0	0	6
6.00	mir-320b-2	Homo sapiens	0	0	0	0	0	6	0	0	0	0	6
6.00	mir-874	Homo sapiens	0	0	0	0	3	5	3	5	1	1	6
6.00	mir-1290	Homo sapiens	0	0	0	0	0	6	0	6	0	0	6
5.00	mir-934	Homo sapiens	0	5	0	5	0	0	0	0	0	0	5
5.00	mir-1271	Homo sapiens	2	4	2	4	0	1	0	1	0	0	5
5.00	mir-887	Homo sapiens	0	3	0	3	0	0	0	0	2	2	5
5.00	mir-455	Homo sapiens	1	2	1	2	0	3	0	3	0	0	5
5.00	mir-873	Homo sapiens	0	2	0	2	0	0	0	0	2	3	5
5.00	mir-197	Homo sapiens	0	0	0	0	2	4	2	4	1	1	5
5.00	mir-1303	Homo sapiens	0	0	0	0	0	5	0	5	0	0	5
5.00	mir-3529	Homo sapiens	0	0	0	0	0	0	0	0	4	5	5
5.00	mir-7706	Homo sapiens	0	0	0	0	0	5	0	5	0	0	5
4.00	mir-185	Homo sapiens	0	4	0	4	0	0	0	0	0	0	4
4.00	mir-660	Homo sapiens	0	4	0	4	0	0	0	0	0	0	4
4.00	mir-3065	Homo sapiens	1	4	1	4	0	0	0	0	0	0	4
4.00	mir-4423	Homo sapiens	0	4	0	4	0	0	0	0	0	0	4
4.00	mir-9985	Homo sapiens	0	4	0	4	0	0	0	0	0	0	4
4.00	mir-34a	Homo sapiens	0	3	0	3	0	0	0	0	1	1	4
4.00	mir-199a-1	Homo sapiens	1	1	0	0	0	3	0	0	0	0	4
4.00	mir-93	Homo sapiens	0	0	0	0	0	4	0	4	0	0	4
4.00	mir-671	Homo sapiens	0	0	0	0	0	4	0	4	0	0	4
4.00	mir-3159	Homo sapiens	0	0	0	0	0	0	0	0	1	4	4
4.00	mir-3679	Homo sapiens	0	0	0	0	0	0	0	0	2	4	4
4.00	mir-4472-2	Homo sapiens	0	0	0	0	0	0	0	0	1	4	4
4.00	mir-6842	Homo sapiens	0	0	0	0	1	4	1	4	0	0	4
4.00	mir-7851	Homo sapiens	0	0	0	0	0	0	0	0	0	4	4
4.00	mir-10395	Homo sapiens	0	0	0	0	0	4	0	4	0	0	4
3.00	mir-212	Homo sapiens	1	3	1	3	0	0	0	0	0	0	3
3.00	mir-484	Homo sapiens	1	3	1	3	0	0	0	0	0	0	3
3.00	mir-486-1	Homo sapiens	0	3	0	0	0	0	0	0	0	0	3
3.00	mir-642a	Homo sapiens	0	3	0	3	0	0	0	0	0	0	3
3.00	mir-3150a	Homo sapiens	0	3	0	2	0	0	0	0	0	0	3
3.00	mir-3613	Homo sapiens	0	3	0	3	0	0	0	0	0	0	3
3.00	mir-130a	Homo sapiens	0	2	0	2	0	1	0	1	0	0	3
3.00	mir-181d	Homo sapiens	0	2	0	2	0	0	0	0	0	1	3
3.00	mir-15b	Homo sapiens	1	1	1	1	0	2	0	2	0	0	3
3.00	mir-676	Homo sapiens	0	1	0	1	2	2	2	2	0	0	3
3.00	mir-103a-1	Homo sapiens	0	0	0	0	0	0	0	0	1	3	3
3.00	mir-326	Homo sapiens	0	0	0	0	1	3	1	3	0	0	3
3.00	mir-505	Homo sapiens	0	0	0	0	0	3	0	3	0	0	3
3.00	mir-514a-1	Homo sapiens	0	0	0	0	2	3	0	0	0	0	3
3.00	mir-514a-2	Homo sapiens	0	0	0	0	3	3	0	0	0	0	3
3.00	mir-514a-3	Homo sapiens	0	0	0	0	3	3	0	0	0	0	3
3.00	mir-320b-1	Homo sapiens	0	0	0	0	0	3	0	0	0	0	3
3.00	mir-1304	Homo sapiens	0	0	0	0	0	2	0	2	0	1	3
3.00	mir-1278	Homo sapiens	0	0	0	0	0	2	0	2	1	1	3
3.00	mir-378c	Homo sapiens	0	0	0	0	0	0	0	0	3	3	3
3.00	mir-1295b	Homo sapiens	0	0	0	0	0	2	0	2	1	1	3
3.00	mir-6868	Homo sapiens	0	0	0	0	0	3	0	3	0	0	3
2.00	mir-139	Homo sapiens	2	2	2	2	0	0	0	0	0	0	2
2.00	mir-215	Homo sapiens	0	2	0	2	0	0	0	0	0	0	2
2.00	mir-422a	Homo sapiens	0	2	0	2	0	0	0	0	0	0	2
2.00	mir-556	Homo sapiens	0	2	0	2	0	0	0	0	0	0	2
2.00	mir-548b	Homo sapiens	0	2	0	2	0	0	0	0	0	0	2
2.00	mir-378d-2	Homo sapiens	0	2	0	2	0	0	0	0	0	0	2
2.00	mir-509-3	Homo sapiens	0	2	0	2	0	0	0	0	0	0	2
2.00	mir-942	Homo sapiens	0	2	0	2	0	0	0	0	0	0	2
2.00	mir-1260a	Homo sapiens	0	2	0	2	0	0	0	0	0	0	2
2.00	mir-3605	Homo sapiens	1	2	1	2	0	0	0	0	0	0	2
2.00	mir-3913-1	Homo sapiens	0	2	0	0	0	0	0	0	0	0	2
2.00	mir-4661	Homo sapiens	0	2	0	2	0	0	0	0	0	0	2
2.00	mir-6876	Homo sapiens	0	2	0	2	0	0	0	0	0	0	2
2.00	mir-486-2	Homo sapiens	0	2	0	2	0	0	0	0	0	0	2
2.00	mir-10527	Homo sapiens	0	2	0	2	0	0	0	0	0	0	2
2.00	mir-504	Homo sapiens	0	1	0	1	0	1	0	1	0	0	2
2.00	mir-877	Homo sapiens	0	1	0	1	0	0	0	0	0	1	2
2.00	mir-1262	Homo sapiens	0	1	0	1	0	0	0	0	1	1	2
2.00	mir-3158-2	Homo sapiens	0	1	0	0	0	1	0	0	0	0	2
2.00	mir-3135b	Homo sapiens	0	1	0	1	0	0	0	0	0	1	2
2.00	mir-19a	Homo sapiens	0	0	0	0	0	2	0	2	0	0	2
2.00	mir-103a-2	Homo sapiens	0	0	0	0	0	0	0	0	1	2	2
2.00	mir-107	Homo sapiens	0	0	0	0	0	0	0	0	2	2	2
2.00	mir-576	Homo sapiens	0	0	0	0	0	2	0	2	0	0	2
2.00	mir-548a-1	Homo sapiens	0	0	0	0	0	2	0	0	0	0	2
2.00	mir-652	Homo sapiens	0	0	0	0	1	2	1	2	0	0	2
2.00	mir-151b	Homo sapiens	0	0	0	0	0	1	0	1	0	1	2
2.00	mir-320c-1	Homo sapiens	0	0	0	0	1	2	0	0	0	0	2
2.00	mir-766	Homo sapiens	0	0	0	0	1	2	1	2	0	0	2
2.00	mir-664a	Homo sapiens	0	0	0	0	0	0	0	0	2	2	2
2.00	mir-1306	Homo sapiens	0	0	0	0	0	1	0	1	0	1	2
2.00	mir-4284	Homo sapiens	0	0	0	0	0	0	0	0	0	2	2
2.00	mir-3664	Homo sapiens	0	0	0	0	0	0	0	0	2	2	2
2.00	mir-548o-2	Homo sapiens	0	0	0	0	1	2	0	0	0	0	2
2.00	mir-4677	Homo sapiens	0	0	0	0	0	2	0	2	0	0	2
2.00	mir-664b	Homo sapiens	0	0	0	0	1	1	1	1	0	1	2
2.00	mir-1273h	Homo sapiens	0	0	0	0	0	1	0	1	0	1	2
2.00	mir-12136	Homo sapiens	0	0	0	0	0	0	0	0	1	2	2
1.00	mir-196a-1	Homo sapiens	1	1	0	0	0	0	0	0	0	0	1
1.00	mir-10b	Homo sapiens	0	1	0	1	0	0	0	0	0	0	1
1.00	mir-129-2	Homo sapiens	0	1	0	0	0	0	0	0	0	0	1
1.00	mir-331	Homo sapiens	0	1	0	1	0	0	0	0	0	0	1
1.00	mir-450a-1	Homo sapiens	0	1	0	0	0	0	0	0	0	0	1
1.00	mir-451a	Homo sapiens	0	1	0	1	0	0	0	0	0	0	1
1.00	mir-450a-2	Homo sapiens	0	1	0	0	0	0	0	0	0	0	1
1.00	mir-581	Homo sapiens	1	1	1	1	0	0	0	0	0	0	1
1.00	mir-584	Homo sapiens	0	1	0	1	0	0	0	0	0	0	1
1.00	mir-592	Homo sapiens	0	1	0	1	0	0	0	0	0	0	1
1.00	mir-641	Homo sapiens	0	1	0	1	0	0	0	0	0	0	1
1.00	mir-548d-2	Homo sapiens	0	1	0	0	0	0	0	0	0	0	1
1.00	mir-659	Homo sapiens	1	1	1	1	0	0	0	0	0	0	1
1.00	mir-1468	Homo sapiens	0	1	0	1	0	0	0	0	0	0	1
1.00	mir-548i-1	Homo sapiens	0	1	0	0	0	0	0	0	0	0	1
1.00	mir-548i-2	Homo sapiens	0	1	0	0	0	0	0	0	0	0	1
1.00	mir-513c	Homo sapiens	0	1	0	1	0	0	0	0	0	0	1
1.00	mir-3120	Homo sapiens	0	1	0	1	0	0	0	0	0	0	1
1.00	mir-3124	Homo sapiens	1	1	1	1	0	0	0	0	0	0	1
1.00	mir-3158-1	Homo sapiens	0	1	0	0	0	0	0	0	0	0	1
1.00	mir-3180-4	Homo sapiens	0	1	0	0	0	0	0	0	0	0	1
1.00	mir-3913-2	Homo sapiens	0	1	0	0	0	0	0	0	0	0	1
1.00	mir-642b	Homo sapiens	0	1	0	1	0	0	0	0	0	0	1
1.00	mir-4510	Homo sapiens	0	1	0	0	0	0	0	0	0	0	1
1.00	mir-4662a	Homo sapiens	1	1	1	1	0	0	0	0	0	0	1
1.00	mir-4776-1	Homo sapiens	1	1	0	0	0	0	0	0	0	0	1
1.00	mir-5701-2	Homo sapiens	0	1	0	0	0	0	0	0	0	0	1
1.00	mir-6736	Homo sapiens	1	1	1	1	0	0	0	0	0	0	1
1.00	mir-6763	Homo sapiens	0	1	0	1	0	0	0	0	0	0	1
1.00	mir-6811	Homo sapiens	0	1	0	1	0	0	0	0	0	0	1
1.00	mir-6516	Homo sapiens	0	1	0	1	0	0	0	0	0	0	1
1.00	mir-203a	Homo sapiens	0	0	0	0	0	1	0	1	0	0	1
1.00	mir-324	Homo sapiens	0	0	0	0	0	0	0	0	0	1	1
1.00	mir-409	Homo sapiens	0	0	0	0	0	1	0	1	0	0	1
1.00	mir-193b	Homo sapiens	0	0	0	0	1	1	1	1	0	0	1
1.00	mir-500a	Homo sapiens	0	0	0	0	0	1	0	1	0	0	1
1.00	mir-508	Homo sapiens	0	0	0	0	0	0	0	0	1	1	1
1.00	mir-548a-2	Homo sapiens	0	0	0	0	0	0	0	0	1	1	1
1.00	mir-599	Homo sapiens	0	0	0	0	0	0	0	0	0	1	1
1.00	mir-421	Homo sapiens	0	0	0	0	0	1	0	1	0	0	1
1.00	mir-760	Homo sapiens	0	0	0	0	0	1	0	1	0	0	1
1.00	mir-944	Homo sapiens	0	0	0	0	0	1	0	1	0	0	1
1.00	mir-1255a	Homo sapiens	0	0	0	0	0	0	0	0	0	1	1
1.00	mir-1268a	Homo sapiens	0	0	0	0	0	0	0	0	0	1	1
1.00	mir-1277	Homo sapiens	0	0	0	0	0	0	0	0	1	1	1
1.00	mir-1288	Homo sapiens	0	0	0	0	0	1	0	1	0	0	1
1.00	mir-320c-2	Homo sapiens	0	0	0	0	0	1	0	0	0	0	1
1.00	mir-1910	Homo sapiens	0	0	0	0	1	1	1	1	0	0	1
1.00	mir-2115	Homo sapiens	0	0	0	0	1	1	1	1	0	0	1
1.00	mir-3135a	Homo sapiens	0	0	0	0	0	0	0	0	0	1	1
1.00	mir-1273c	Homo sapiens	0	0	0	0	0	0	0	0	0	1	1
1.00	mir-3177	Homo sapiens	0	0	0	0	1	1	1	1	0	0	1
1.00	mir-3665	Homo sapiens	0	0	0	0	0	0	0	0	0	1	1
1.00	mir-3908	Homo sapiens	0	0	0	0	0	0	0	0	0	1	1
1.00	mir-3909	Homo sapiens	0	0	0	0	1	1	1	1	0	0	1
1.00	mir-3929	Homo sapiens	0	0	0	0	0	0	0	0	0	1	1
1.00	mir-374c	Homo sapiens	0	0	0	0	0	0	0	0	1	1	1
1.00	mir-4512	Homo sapiens	0	0	0	0	0	0	0	0	0	1	1
1.00	mir-548am	Homo sapiens	0	0	0	0	0	1	0	1	0	0	1
1.00	mir-4728	Homo sapiens	0	0	0	0	0	0	0	0	1	1	1
1.00	mir-5001	Homo sapiens	0	0	0	0	0	1	0	1	0	0	1
1.00	mir-5188	Homo sapiens	0	0	0	0	0	1	0	1	0	0	1
1.00	mir-5684	Homo sapiens	0	0	0	0	0	0	0	0	1	1	1
1.00	mir-5689	Homo sapiens	0	0	0	0	0	0	0	0	0	1	1
1.00	mir-6127	Homo sapiens	0	0	0	0	0	0	0	0	0	1	1
1.00	mir-548az	Homo sapiens	0	0	0	0	0	0	0	0	1	1	1
1.00	mir-6503	Homo sapiens	0	0	0	0	0	0	0	0	1	1	1
1.00	mir-6515	Homo sapiens	0	0	0	0	0	1	0	1	0	0	1
1.00	mir-6735	Homo sapiens	0	0	0	0	0	0	0	0	0	1	1
1.00	mir-6843	Homo sapiens	0	0	0	0	0	1	0	1	0	0	1
1.00	mir-6853	Homo sapiens	0	0	0	0	0	1	0	1	0	0	1
1.00	mir-6894	Homo sapiens	0	0	0	0	0	1	0	1	0	0	1
1.00	mir-7155	Homo sapiens	0	0	0	0	0	1	0	1	0	0	1
0.00	mir-129-1	Homo sapiens	0	0	0	0	0	0	0	0	0	0	0
0.00	mir-196a-2	Homo sapiens	0	0	0	0	0	0	0	0	0	0	0
0.00	mir-548a-3	Homo sapiens	0	0	0	0	0	0	0	0	0	0	0
0.00	mir-548d-1	Homo sapiens	0	0	0	0	0	0	0	0	0	0	0
0.00	mir-1295a	Homo sapiens	0	0	0	0	0	0	0	0	0	0	0
0.00	mir-548o	Homo sapiens	0	0	0	0	0	0	0	0	0	0	0
0.00	mir-548i-3	Homo sapiens	0	0	0	0	0	0	0	0	0	0	0
0.00	mir-548i-4	Homo sapiens	0	0	0	0	0	0	0	0	0	0	0
0.00	mir-3180-5	Homo sapiens	0	0	0	0	0	0	0	0	0	0	0
0.00	mir-3150b	Homo sapiens	0	0	0	0	0	0	0	0	0	0	0
0.00	mir-4776-2	Homo sapiens	0	0	0	0	0	0	0	0	0	0	0
0.00	mir-5701-1	Homo sapiens	0	0	0	0	0	0	0	0	0	0	0
0.00	mir-5701-3	Homo sapiens	0	0	0	0	0	0	0	0	0	0	0
