# Supplementary material for: Conserved MicroRNAs in Human Nasopharynx Tissue Samples from Swabs Are Differentially Expressed in Response to SARS-CoV-2
Source: Genes (Basel). 2022 Feb 14;13(2):348. doi: 10.3390/genes13020348 (PMC8871708; doi:10.3390/genes13020348)
Supplement: Supplementary file 1 [file genes-13-00348-s001.zip › Supplementary Table S3.xlsx]

## Sheet: List1
miRNA/sample	1A	2A	3A	5A	6A	9A	10A	11A	13A	15A	Total NegS	F11	F7	D11	G9	B1	F5	A7	D3	H3	H5	Total PosS
let-7a-1	545.861	97.7354	45.0794	159.195	313.727	839.186	1197.29	85.7706	169.231	567.321	4020.4	1070.21	157.687	364.716	419.583	460.712	337.152	432.832	363.23	416.067	404.971	4427.16
let-7a-2	541.71	94.5441	48.9993	156.887	304.5	809.277	1179.61	83.223	164.44	212.104	3595.29	1042.19	154.279	361.747	417.731	449.503	321.083	420.96	374.406	411.864	398.78	4352.54
let-7a-3	542.748	97.7354	47.0394	159.483	315.777	839.186	1194.85	84.0722	169.06	216.937	3666.88	1067.4	159.505	367.19	423.288	461.385	334.522	435.748	385.583	416.467	404.372	4455.46
let-7b	3675.74	974.961	1395.5	372.607	575.166	5272.22	4989.53	243.3	1197.11	1933.64	20629.8	4296.23	1060.86	1193.62	3626.2	3519.8	4191.32	5125.25	1341.16	1973.66	1280.81	27608.9
let-7c	1113.51	222.996	190.117	95.1706	178.394	638.492	994.671	49.679	278.23	645.441	4406.71	1071.61	215.627	251.887	893.814	799.689	763.996	630.294	379.994	432.477	434.126	5873.51
let-7d	59.1522	7.18056	1.95997	25.6672	45.111	192.458	123.605	18.2581	25.4958	42.4208	541.309	155.488	29.0835	78.1888	67.1518	86.7618	52.0043	97.481	44.7052	81.2521	66.297	758.414
let-7e	51.369	2.39352	1.95997	3.74915	10.2525	36.411	145.617	4.24607	12.6624	10.7394	279.4	54.631	6.58922	19.2998	36.1231	19.5046	28.3394	38.9507	50.2934	10.8069	11.7817	276.32
let-7f-1	598.268	159.568	72.519	282.628	423.429	843.954	1193.34	79.4015	160.675	220.696	4034.48	1264.92	203.584	293.95	587.694	595.451	305.599	426.792	860.576	680.236	597.072	5815.87
let-7f-2	702.562	240.948	131.318	288.107	429.58	875.597	1329.55	78.5523	176.418	250.766	4503.4	1350.37	214.718	300.384	616.871	640.289	368.121	430.541	905.281	696.046	610.452	6133.07
let-7g	655.863	191.881	162.678	519.401	573.115	893.369	1163.43	82.7984	265.054	417.765	4925.35	1968.12	415.348	371.149	819.715	949.672	536.697	1283.29	821.459	723.063	603.662	8492.17
let-7i	1854.99	1055.54	750.67	579.964	574.141	4028.18	1676.85	112.096	731.508	1580.85	12944.8	3510.39	850.464	690.338	3342.31	1797.34	2335.81	4911.96	1587.04	1915.43	1700.56	22641.6
mir-100	254.77	66.2208	78.3989	71.2338	100.475	64.1526	128.496	19.5319	94.1122	231.972	1109.36	690.591	99.7472	62.3531	395.501	366.776	301.8	636.959	173.233	262.368	163.945	3153.27
mir-101-1	143.211	29.919	23.5197	66.3311	116.879	180.321	75.2541	13.1628	56.2962	63.3627	768.256	187.706	23.8575	25.733	67.1518	103.128	90.5694	148.513	78.2341	70.4451	61.9038	857.242
mir-101-2	149.437	31.1158	25.4797	70.657	114.828	192.024	81.8388	16.1351	62.114	72.4913	816.121	205.917	22.9487	30.1868	73.1723	114.562	92.9066	157.053	67.0578	78.2501	71.0896	913.143
mir-10392	0	0.39892	0	0.288396	0	0	0.940676	0	0	0	1.62799	5.60317	0	0	0	0	0	0.208293	0	0	0	5.81147
mir-10394	0	0	0	0	0	0	0.37627	0	0	0	0.37627	0	0	0	0	0	0	0	0	0	0	0
mir-10395	6.74543	4.38812	1.95997	3.74915	7.17676	2.60078	29.161	1.69843	7.18675	0	64.6663	0	3.86265	3.46406	8.33609	0.672572	5.84318	14.5805	0	5.40346	5.791	47.9535
mir-10396a	1.03776	3.9892	0	1.73038	3.07575	0	0.752541	0	0.342226	0	10.9279	0	0.227214	0	0	0.224191	0.292159	0	0	0.200128	1.39783	2.34152
mir-10396b	2.5944	36.7007	0	1.73038	6.15151	0	1.69322	0	0.855565	0	49.7257	0	0.454429	0.989732	0.926232	0.448382	0.292159	0	5.58815	0	2.19659	10.8957
mir-10397	0	0	0	0	0	0	0	0	0	0	0	0	0	0	0	0	0	0.416585	0	0	0	0.416585
mir-10398	0	0	0	0	0	0	0	0	0	0	0	0	0	0.494866	0	0	0	0	0	0	0.19969	0.694556
mir-10399	2.07552	0	0	1.44198	1.02525	9.10274	2.44576	1.27382	0.513339	0	17.8784	12.6071	4.08986	1.4846	8.7992	6.05315	6.4275	6.45707	0	4.00256	3.19504	53.1161
mir-103a-1	0.518879	0	0	0.576792	0	3.03425	0.940676	0	0.342226	0.536972	5.94979	4.20238	0.454429	0.989732	0.926232	2.91448	10.2256	5.6239	0	1.4009	1.19814	27.9358
mir-103a-2	0.518879	0	0	0	1.02525	3.03425	2.06949	0.424607	0.513339	0.536972	8.12278	2.80159	0.681643	0.494866	0.926232	3.13867	10.2256	4.99903	5.58815	1.60103	0.599069	31.0558
mir-103b-1	9.33982	0	0	10.6706	25.6313	30.7759	29.7254	3.39686	4.44894	12.3504	126.339	28.0159	6.13479	8.90758	18.9878	17.9353	0	21.8707	5.58815	14.4092	13.5789	135.428
mir-103b-2	8.30207	0	0	9.51706	22.5555	32.0763	28.9728	2.97225	4.10671	12.3504	120.853	23.8135	6.36201	7.91785	18.0615	18.1595	0	22.9122	5.58815	14.6094	12.7801	130.204
mir-10400	743.554	0	15.6798	314.063	329.106	28.6086	393.579	6.3691	486.474	27.3856	2344.82	25.2143	83.8421	109.365	67.1518	153.122	16.9452	15.622	162.056	80.0513	795.165	1508.54
mir-10401	0	0	0	0	0	0	0.564406	0	0.171113	0	0.735519	0	0	0.494866	0.926232	0	0	0.208293	0	0	0	1.62939
mir-10527	1.03776	0	0	0.288396	2.0505	1.30039	0	0	0.855565	2.14789	7.6805	2.80159	0	0.494866	0	0.224191	0	0.208293	0	1.80115	0.798759	6.32885
mir-106a	0	0	0	0.865188	0	0	0.188135	0	13.689	15.0352	29.7776	0	0	0	0	0.224191	0	0	0	0.400256	0.599069	1.22352
mir-106b	15.5664	11.5687	11.7598	15.8618	23.5808	64.1526	46.4694	6.3691	0	0	195.329	82.6468	7.27086	6.92812	23.6189	30.2658	63.9829	47.699	44.7052	17.4112	12.9798	337.509
mir-107	1.03776	0	0	0.288396	3.07575	3.03425	0.564406	0.424607	0.513339	0	8.9385	2.80159	0.454429	0.494866	0.926232	3.81124	0.292159	5.20732	0	2.00128	0.998449	16.9876
mir-10a	12.972	6.38272	25.4797	3.74915	5.12625	27.7417	12.2288	0.424607	10.7801	0.536972	105.422	26.6151	2.27214	2.96919	21.3033	2.4661	40.318	23.3288	33.5289	11.0071	3.59442	167.403
mir-10b	0.518879	2.79244	0	0	2.0505	0.433464	0	0	1.19779	3.75881	10.7519	1.40079	0	0.494866	0	0	2.33727	1.04146	44.7052	0.200128	0	50.1798
mir-1-1	0	0	0	0.288396	1.02525	1.30039	0	0	0	0.536972	3.15101	0	0.227214	0	0	0.672572	0	0.624878	0	1.00064	0.19969	2.725
mir-1180	122.455	36.3017	54.8793	30.8584	47.1615	118.336	229.149	39.4885	114.988	225.528	1019.15	144.282	86.5687	50.9712	198.214	282.48	389.448	420.126	89.4104	90.0577	95.6514	1847.21
mir-1181	0	0	0	0.288396	0	0	0.37627	0	0	0	0.664666	0	0	0	0	0.224191	0	0.208293	0	0.600385	0.19969	1.23256
mir-1183	0	0	0	0	1.02525	0	0	0	0	0	1.02525	0	0	0	0	0	0	0	0	0	0	0
mir-1-2	0	0	0	0	0	1.30039	0	0	0	0	1.30039	0	0.227214	0	0	0.448382	0	0.624878	0	0	0.599069	1.89954
mir-12125	0	0	0	0	0	0	0	0	0	0	0	0	0	0.494866	0	0	0	0	0	0	0	0.494866
mir-12135	0	0	0	0	0	0	0.188135	0	0	0	0.188135	0	0	0	0	0	0	0	0	0	0	0
mir-12136	2.5944	0	1.95997	0.288396	9.22726	3.03425	7.33727	0.424607	0.513339	0	25.3795	2.80159	1.36329	0	0	1.34514	1.4608	4.79073	0	0.200128	0.19969	12.1614
mir-122	2.07552	0	0	0	0	0.433464	0	0.424607	0.171113	0	3.1047	0	0	0	0	0	0	0.208293	0	0.400256	0	0.608549
mir-1224	0	0	0	0	692.044	0	0	0	0	0	692.044	0	0	0	0	0	0	0.208293	0	0	0	0.208293
mir-1225	0	0	0	0	0	0	0.188135	0	0	0	0.188135	0	0	0	0	0	0	0	0	0	0	0
mir-1226	0	0	0	0	0	0	0	0	0	0	0	0	0	0	0	0	0.584318	0.208293	0	0	0.39938	1.19199
mir-1227	0	0	0	0	0	0	0.564406	0	0	0	0.564406	0	0	0.494866	0	0	0	0	0	0	0	0.494866
mir-1228	0	0	0	0	0	0.433464	0	0	0	0	0.433464	0	0	0	0	0	0	0.624878	0	0.200128	0	0.825006
mir-1229	0	0	0	0	0	0	0	0	0	0	0	0	0	0	0	0	0	0.208293	0	0	0	0.208293
mir-1237	0	0	0	0.576792	0	0	0.188135	0	0	0	0.764927	0	0	0	0	0	0	0	0	0	0	0
mir-124-1	0	0	0	0	0	0	0	0	0	0	0	0	0	0	0.463116	0	0	0	0	0	0	0.463116
mir-124-2	0	0	0	0	0	0	0	0	0	0	0	0	0	0	0.463116	0	0	0	0	0	0	0.463116
mir-1244-3	0.518879	0	0	0	0	0	0	0	0	0	0.518879	0	0	0	0	0	0	0	0	0	0	0
mir-1244-4	0.518879	0	0	0	0	0	0	0	0	0	0.518879	0	0	0	0	0	0	0	0	0	0	0
mir-1246	145.805	5.9838	0	68.0614	0	194.192	51.3609	644.129	72.0386	10.7394	1192.31	22.4127	6.58922	79.6734	25.4714	89.4521	32.4297	16.6634	11.1763	55.4355	101.243	440.546
mir-1248	0	0.39892	0	0.865188	0	0	1.50508	0	0.855565	0	3.62475	0	0	0	0	0.672572	0.584318	0.833171	0	1.00064	0.998449	4.08915
mir-1249	0	0.79784	0	123.145	0	0.433464	0	0	0	0	124.376	0	0	0	0	0	0	0	0	0	0	0
mir-1255a	0	0	0	0	0	1.30039	0	0	0	0	1.30039	1.40079	0	0	0	0.224191	0	0	0	0.200128	0.39938	2.22449
mir-1255b-1	0	0	0	0	0	0.866927	0	0	0	0	0.866927	0	0	0	0	0.224191	0	0	0	0	0	0.224191
mir-1257	0	0	0	0	0	0	0	0	0.171113	0	0.171113	0	0	0	0	0	0	0	0	0	0	0
mir-125a	193.023	22.7385	37.2395	0	228.631	242.306	242.13	69.6355	68.7874	83.7677	1188.26	324.984	53.3954	119.263	141.714	106.939	119.201	190.171	78.2341	56.8364	72.088	1262.83
mir-125b-1	51.8879	8.37732	9.79987	27.3976	48.1868	58.0841	65.0948	11.0398	22.2447	57.993	360.106	124.671	29.7651	43.5482	102.349	110.526	62.2299	154.137	33.5289	59.4381	52.3187	772.511
mir-125b-2	59.6711	8.37732	3.91995	29.4164	54.3383	61.5519	69.2337	9.34135	26.0092	56.9191	378.778	127.472	29.3107	44.5379	102.812	108.284	61.3534	156.636	33.5289	60.6389	51.9193	776.493
mir-126	3.63215	6.78164	1.95997	1.15358	19.4798	32.0763	4.89151	0	1.54002	1.61092	73.1259	8.40476	0.227214	1.4846	10.6517	9.19182	2.04511	14.1639	329.701	16.2104	8.78635	400.867
mir-1260a	0.518879	0	0	0	0	0	2.63389	0.849214	0.171113	0.536972	4.71007	2.80159	0	0	0	0	0.876478	0	0	0	0.19969	3.87775
mir-1260b	0	0	0	0.576792	3.07575	0	0.564406	0	0	0.536972	4.75392	0	0	0.989732	0	0.224191	0	0	0	0	0.19969	1.41361
mir-1262	7.78319	0.39892	1.95997	0	0	0.866927	0.188135	0	0.684452	1.07394	12.9555	2.80159	0.454429	0	0.463116	1.56934	0	2.29122	5.58815	0.200128	0.19969	13.5677
mir-1266	0	0	0	0	0	0	0.752541	0	0	0	0.752541	0	0	0	0	1.12095	0.292159	0.624878	0	0	0.19969	2.23768
mir-1267	0	0	0	0	0	0.433464	0	0	0	0	0.433464	0	0	0	0	0	0	0	0	0.200128	0	0.200128
mir-1268a	0	0	0	2.30717	4.101	0	2.44576	0.849214	2.22447	0.536972	12.4646	1.40079	0.681643	0.989732	0	2.24191	0	0.416585	0	0.200128	3.19504	9.12583
mir-1268b	0	0	0	0.865188	0	0.433464	0.752541	0	1.19779	0	3.24898	15.4087	0.227214	1.4846	1.85246	0.896763	0	0	0	0	0	19.8698
mir-1269a	2.07552	0.39892	0	2.88396	1.02525	0	12.9813	0.849214	1.02668	0.536972	21.7778	8.40476	2.72657	4.94866	1.85246	2.69029	3.21375	8.12342	0	0.200128	0.798759	32.9588
mir-1269b	0	1.59568	0	0	0	0.433464	0	0	0	0	2.02914	0	0	0	3.24181	0	0	0	0	0	0	3.24181
mir-127	4.66991	0.79784	0	0	0	0	0.564406	0	0	0	6.03216	0	0	0	0	0.224191	1.4608	0.416585	0	0.200128	2.19659	4.49829
mir-1270	0	0	0	0	0	0	0	0	0	0	0	0	0	0	0	0	0	0	0	0.200128	0	0.200128
mir-1271	0	0	0	0	0	0.866927	0.188135	0	0.171113	0	1.22618	7.00397	0	0	0.463116	0.448382	0.876478	0	0	0.200128	0.19969	9.19176
mir-1273c	0	0	0	1.73038	0	0.866927	1.69322	0	1.3689	0	5.65942	1.40079	0.454429	0	0.926232	1.34514	0.584318	2.29122	0	0.400256	1.79721	9.1996
mir-1273h	8.30207	0.39892	0	6.63311	7.17676	7.36888	10.5356	2.54764	7.70009	0.536972	51.2	2.80159	2.72657	9.40245	6.02051	1.79353	5.25887	3.33268	0	3.80244	12.5805	47.7191
mir-1276	1.55664	0	0	0	0	0	0	0	0	0	1.55664	0	0	0	0	0	0	0.208293	0	0	0	0.208293
mir-1277	0	0	0	0.288396	1.02525	2.16732	0.37627	0	0	0	3.85724	1.40079	0	0	0	1.79353	0	0	0	0.800513	0	3.99483
mir-1278	1.55664	0	0	0	1.02525	2.16732	0.940676	0	0.855565	0	6.54545	4.20238	0	0	0.926232	0.224191	0.876478	0.208293	0	0.200128	0	6.6377
mir-128-1	175.9	32.7115	94.0787	64.6007	99.4493	378.414	257.369	53.5005	143.906	116.523	1416.45	229.73	35.2182	53.9404	69.0043	117.252	190.488	79.3595	78.2341	73.6472	65.0989	991.972
mir-1282	0	0	0	0	0	0	0.188135	0	93.5988	0	93.787	0	0	0	0	0	0	0	0	0	0	0
mir-128-2	112.078	21.5417	48.9993	43.8362	55.3635	246.207	161.608	39.0638	0	80.5459	809.244	176.5	28.629	48.002	58.3526	102.007	117.448	71.4444	55.8815	46.83	42.7336	747.828
mir-1284	0.518879	0	0	0	2.0505	0.433464	0	0	0.342226	0.536972	3.88204	0	0	0.494866	0	0	0	0	0	0	0	0.494866
mir-1285-1	33.7271	3.59028	0	26.8208	30.7575	10.4031	20.883	6.3691	27.3781	4.29578	164.225	12.6071	6.13479	14.846	6.48362	10.3128	4.38239	5.41561	5.58815	8.60551	36.7429	111.119
mir-1285-2	3.11327	0.39892	1.95997	1.73038	1.02525	2.16732	3.38643	0.424607	1.71113	0	15.9173	0	0.681643	0.494866	0.926232	2.24191	1.16864	1.24976	5.58815	1.60103	2.79566	16.7479
mir-1287	10.8965	0	0	0.865188	10.2525	6.06849	5.64406	0.849214	3.25115	2.68486	40.5119	15.4087	1.5905	2.96919	1.85246	8.96763	2.04511	0	0	0	2.39628	35.2299
mir-1288	0.518879	0	0	0	0	0.433464	0.564406	0	0	1.07394	2.59069	1.40079	0.227214	0	0	0.672572	1.16864	0	0	0.400256	0	3.86947
mir-1289-1	0	0.39892	0	0	0	0.433464	0.37627	0	0.171113	0	1.37977	0	0	0	0.463116	0.672572	0	0	0	0.200128	0	1.33582
mir-1289-2	0	0	0	0	0	0	0	0	0	0	0	0	0	0	0	0	0	0	0	0	0	0
mir-1290	16.6041	0	0	27.686	44.0858	38.1448	12.0407	22.5042	7.8712	1.61092	170.548	8.40476	2.49936	19.7946	3.70493	9.19182	7.01182	2.29122	16.7645	0	10.5836	80.2466
mir-1291	0	0	0	0.865188	0	2.16732	1.31695	0	0.171113	0	4.52057	0	0	0.494866	2.7787	0.224191	0.584318	0.624878	22.3526	0	0.19969	27.2593
mir-129-1	1.55664	0	0	0	0	0	0.188135	0	0.855565	0	2.60034	0	0	0	0.463116	0.224191	2.04511	2.49951	5.58815	0	0	10.8201
mir-1292	0	1.59568	0	0.288396	0	2.16732	0.940676	0	0.855565	0.536972	6.38461	0	0.681643	0.494866	1.85246	2.24191	1.4608	1.87463	5.58815	8.00513	0	22.1996
mir-129-2	1.03776	0	0	0	0	0	0.188135	0	0.855565	0	2.08146	1.40079	0.227214	0	0	0.448382	2.62943	1.66634	111.763	0	0	118.135
mir-1293	0	0.79784	0	0	0	3.46771	0.564406	0	0	0	4.82996	0	0.454429	0	0	0	3.21375	0.208293	385.583	1.20077	0.19969	390.859
mir-1294	1.55664	0	0	0	0	0.433464	0	0.424607	0.171113	0	2.58582	0	0	0	0.463116	0.448382	0	0	0	0	0	0.911498
mir-1295a	0.518879	0	0	0	2.0505	0.433464	1.69322	0	1.02668	1.61092	7.33366	0	1.13607	0.989732	1.38935	1.56934	0.876478	1.66634	111.763	1.00064	0.798759	121.19
mir-1295b	1.03776	0	0	0	1.02525	0.433464	0.188135	0	0.684452	1.07394	4.44301	4.20238	0	0	2.31558	2.24191	1.75296	1.45805	301.76	0.200128	0.39938	314.331
mir-1296	0	0	0	0	0	0	0.752541	0	0	1.07394	1.82649	0	0	0	0	0	0	0.624878	357.642	0	0	358.267
mir-1298	0	0	0	0	0	0	0	0	0	0	0	0	0	0	0	0.224191	0	0	0	0	0	0.224191
mir-1299	13.4909	0.79784	0	0	3.07575	0.866927	3.01016	0.424607	0.513339	0	22.1795	0	3.181	0	4.63116	4.25963	0.584318	0.624878	11.1763	2.40154	0.39938	27.2582
mir-1301	7.26431	4.78704	7.83989	2.88396	4.101	31.2094	12.9813	1.69843	6.33118	7.51761	86.6141	18.2103	2.72657	1.97946	9.72544	8.07087	9.05694	23.3288	9466.33	6.80436	7.7879	9554.02
mir-1302-4	0	0	0	0	0	0	0.188135	0	0	0	0.188135	0	0	0	0	0	0	0	0	0	0	0
mir-1302-8	0	0	0	0	0	0	0	1.27382	0	0	1.27382	0	0	0	0	0	0	0	0	0	0	0
mir-1303	3.63215	0	0	1.15358	0	4.7681	5.26779	1.27382	1.54002	2.14789	19.7834	7.00397	1.36329	0	0.926232	3.13867	0.876478	2.29122	117.351	1.00064	2.59597	136.548
mir-1304	4.15103	0	1.95997	2.01877	1.02525	3.46771	1.31695	0	0.855565	0	14.7952	4.20238	0	0.494866	0.926232	0	4.09023	0.833171	11.1763	1.80115	0.599069	24.1234
mir-1306	3.11327	1.59568	0	0.576792	0	6.50196	2.44576	0	0.684452	5.36972	20.2876	2.80159	0	0.989732	2.31558	2.4661	2.62943	2.29122	111.763	1.00064	2.39628	128.654
mir-1307	16.0853	11.9676	11.7598	9.22867	16.404	112.267	56.2524	11.0398	28.5759	28.9965	302.577	39.2222	10.2247	15.3408	24.5452	155.14	124.752	76.4434	22.3526	21.0135	19.1702	508.205
mir-130a	3.11327	0	0	0.288396	0	3.46771	1.69322	0.424607	1.3689	0	10.3561	4.20238	1.81772	0.494866	2.31558	1.56934	0	1.24976	16.7645	2.40154	1.39783	32.2135
mir-130b	0	0	0	0.288396	3.07575	5.20156	1.12881	0.424607	0.342226	0	10.4614	0	0.227214	0.494866	1.38935	1.12095	0.876478	1.04146	22.3526	0.600385	1.39783	29.5011
mir-132	20.2363	4.78704	5.87992	4.61433	16.404	52.8826	20.6949	6.3691	18.138	19.868	169.874	42.0238	8.40694	5.44352	10.6517	30.7141	19.8668	39.3673	16.7645	14.6094	10.9829	198.831
mir-133a-1	0.518879	0	0	0	1.02525	0	0	0	0	0	1.54413	0	0	0	0.463116	0	0	0.208293	22.3526	0	0	23.024
mir-133a-2	25.4251	0	0	0	0	0	0	0.424607	0	0	25.8497	0	0	0	0	0	0	0.208293	5.58815	0	0	5.79645
mir-134	0	0	0	0	0	0	0.940676	0	0	0	0.940676	0	0	0	0	0.224191	0	0	0	0	0	0.224191
mir-1343	0.518879	0	0	0	0	0.866927	0.564406	0	0.342226	0	2.29244	0	0	0	0.926232	0	0	0.208293	184.409	0	0	185.544
mir-135a-1	25.4251	0	0	0	0	0	0	0	0.171113	0	25.5962	0	0	0	0	0	0	0	0	0	0.19969	0.19969
mir-135a-2	0	0	0	0	0	0	0.188135	0	0	0	0.188135	0	0	0	0	0	0	0	0	0	0	0
mir-135b	25.4251	8.37732	9.79987	4.61433	15.3788	44.6468	47.2219	1.69843	10.4379	35.4402	203.041	74.2421	8.63415	12.3716	12.9672	37.6641	9.93341	28.7444	22.3526	15.0096	28.955	250.874
mir-136	0	0	0	0	0	0	1.12881	0	0	0	1.12881	0	0	0	0	0	0	0	0	0	0	0
mir-138-1	0	0	0	0	0	0	0	0	0	0	0	0	0	0	0	0	0.292159	0	0	0	0	0.292159
mir-139	0	0	0	0	0	2.60078	1.12881	0	0.171113	0	3.90071	2.80159	0	0	0	0.448382	0	0.624878	5.58815	0.200128	0.19969	9.86282
mir-140	98.587	77.7894	47.0394	51.3345	50.2373	296.923	37.2508	8.49214	38.1582	78.398	784.209	142.881	23.6303	10.887	98.1806	140.343	54.6338	169.967	184.409	86.4554	65.6979	977.085
mir-141	110.002	33.5093	39.1995	43.2594	132.257	250.109	131.695	22.5042	90.5188	198.68	1051.73	385.218	96.5662	73.735	137.082	707.322	109.268	478.865	111.763	171.31	168.538	2439.67
mir-142	111.04	14.76	9.79987	135.834	29.7323	994.799	22.9525	25.901	81.1076	66.0476	1491.97	217.123	22.267	51.466	172.742	176.887	125.921	391.174	385.583	265.37	139.783	1948.31
mir-143	74.1997	9.97301	9.79987	111.321	30.7575	548.765	19.3779	28.8733	13.5179	26.3116	872.897	102.258	1.13607	19.7946	12.041	20.4014	34.7669	31.2439	111.763	166.907	45.5293	545.841
mir-144	0	0	0	0	0	1.30039	0	0	0.513339	0.536972	2.3507	0	0	0	1.38935	0	0	0.833171	301.76	0.800513	0.39938	305.183
mir-145	1.55664	0	0	0.288396	0	11.7035	0.188135	0.424607	0.171113	0.536972	14.8694	0	0	0.494866	1.85246	0	0	0.416585	357.642	1.80115	0	362.207
mir-1468	0.518879	0	0	0.576792	0	0.866927	0.940676	0	0.684452	0.536972	4.1247	1.40079	0	229.618	0	0	2.92159	1.87463	11.1763	0.400256	0.39938	247.791
mir-146a	318.592	187.891	74.479	312.621	175.318	1915.04	105.732	137.148	274.807	373.733	3875.36	1246.71	360.817	42.5585	437.645	440.983	268.494	773.183	301.76	806.317	394.387	5072.85
mir-146b	420.811	112.097	121.518	126.606	69.7171	1402.26	178.164	11.0398	184.802	172.905	2799.91	381.016	71.7998	0	327.886	304.9	218.243	613.005	357.642	658.022	164.345	3096.86
mir-147b	0.518879	7.57948	1.95997	1.73038	0	13.0039	2.63389	0	3.08003	2.68486	33.1914	15.4087	1.13607	2.96919	2.31558	7.84668	3.21375	3.33268	11.1763	2.00128	1.59752	50.9978
mir-148a	38423.5	18540.6	26820.3	5309.37	24445.1	31791.5	30006.6	3372.65	20236.9	13418.9	212365	31359.6	3209.18	3563.03	3926.3	13036.9	53305.3	6668.49	9466.33	5389.05	7798.08	137722
mir-148b	222.08	65.8218	56.8392	55.372	131.232	163.849	154.271	16.9843	106.432	108.468	1081.35	347.397	41.8075	33.6509	69.9305	116.579	203.927	187.88	117.351	61.0391	90.4595	1270.02
mir-149	14.5286	3.19136	5.87992	0.288396	11.2778	12.137	30.4779	3.82146	4.96228	12.3504	98.915	44.8254	2.04493	2.47433	5.09428	17.7111	24.5414	16.0385	11.1763	2.20141	2.79566	128.903
mir-150	8.30207	7.57948	7.83989	17.3038	0	33.3767	4.32711	0.424607	6.67341	6.98064	92.8077	21.0119	6.13479	6.43325	108.369	32.5077	23.0806	139.973	111.763	15.4099	5.19193	469.875
mir-151a	3374.27	1791.15	1483.7	476.142	1381.01	2096.23	1879.66	287.884	1494.5	1758.58	16023.1	4293.43	714.362	719.535	1246.25	2189.22	3822.61	1876.3	1799.39	696.446	1123.45	18481
mir-151b	0	0	0	0	0	0	0	0	0	0	0	2.80159	0	0	0	0.224191	0	0	0	0	0	3.02578
mir-152	119.861	27.1266	15.6798	47.2969	206.075	75.8562	106.485	6.79371	36.6182	57.4561	699.248	229.73	16.8139	36.6201	28.7132	84.0716	35.0591	55.4059	39.1171	25.4163	38.5401	589.487
mir-153-1	0	0.39892	0	0	0	0	0.752541	0	0	0.536972	1.68843	0	0.681643	0	0	0	0	0.624878	100.587	0	0	101.893
mir-153-2	0.518879	0.39892	0	0	1.02525	0	0.752541	0	0	0.536972	3.23256	0	0.454429	0	0	0	0	0.833171	5.58815	0.200128	0	7.07588
mir-1538	0	0	0	0	0	0	0.188135	0	0	0	0.188135	0	0	0	0	0	0	0	0	0	0	0
mir-155	21.7929	15.5579	9.79987	24.2253	1.02525	110.967	2.25762	0.849214	8.04231	8.59156	203.109	29.4167	8.40694	4.45379	70.3936	36.7673	15.1923	46.4493	100.587	40.0256	15.1764	366.869
mir-15a	0	0.79784	0	2.30717	1.02525	1.73385	1.50508	0.424607	0.342226	0.536972	8.673	0	0.681643	0.494866	1.38935	0.672572	0	0.833171	5.58815	1.00064	0.19969	10.8601
mir-15b	1.55664	0	0	3.17235	4.101	10.4031	5.64406	1.27382	0.684452	0.536972	27.3724	4.20238	2.72657	0	0.926232	4.48382	0.292159	3.33268	5.58815	3.80244	1.79721	27.1516
mir-16-1	18.1608	3.19136	1.95997	12.6894	14.3535	94.4951	19.3779	3.82146	10.7801	19.868	198.698	39.2222	6.13479	6.92812	14.3566	26.4545	12.855	38.1176	11.1763	21.2136	17.9721	194.431
mir-16-2	35.2838	7.57948	13.7198	21.3413	22.5555	195.926	39.1321	11.4644	28.9181	34.9032	410.823	78.4444	11.1335	12.3716	27.3238	49.7704	28.9238	58.322	11.1763	37.424	32.5494	347.439
mir-17	0	0.39892	0	1.15358	0	3.90117	0.37627	0	0	0	5.82995	0	1.13607	0	1.85246	2.24191	0.292159	1.04146	5.58815	0.400256	0.998449	13.5509
mir-181a-1	100.663	23.5363	21.5597	41.2406	86.1211	275.683	171.015	17.8335	61.6007	150.889	950.141	250.742	62.7112	49.9814	85.6765	287.861	153.968	350.973	117.351	98.263	91.8573	1549.38
mir-181a-2	105.851	25.132	21.5597	42.1058	80.9948	279.151	174.025	17.4089	61.0873	144.983	952.298	263.349	63.3928	46.5174	86.6027	291.448	155.721	351.806	128.528	98.0628	93.6545	1579.08
mir-181b-1	15.5664	6.38272	1.95997	7.49829	11.2778	67.6203	20.5067	5.09528	10.0957	27.3856	173.389	63.0357	11.8152	9.89732	29.1763	84.2957	18.6982	71.2361	16.7645	30.4195	19.3699	354.708
mir-181b-2	14.5286	8.37732	1.95997	7.78669	14.3535	67.6203	20.1305	3.39686	10.0957	28.9965	177.246	56.0317	11.1335	10.887	26.3976	83.399	18.6982	70.8195	11.1763	30.6196	19.3699	338.532
mir-181c	1.55664	0.39892	0	1.73038	2.0505	5.20156	1.88135	0.424607	0.342226	0.536972	14.1232	11.2063	0	0.989732	0	4.03543	1.75296	3.74927	83.8223	2.00128	0	107.557
mir-181d	3.11327	0.79784	0	3.17235	3.07575	13.8708	5.07965	1.27382	2.39558	4.29578	37.0749	4.20238	2.49936	3.95893	5.09428	12.5547	5.84318	12.2893	106.175	7.20462	2.59597	162.418
mir-182	243.873	100.528	39.1995	31.4352	147.636	200.694	225.762	12.7382	97.8766	124.578	1224.32	288.564	56.3492	48.002	88.9183	213.654	53.173	187.463	83.8223	58.6376	100.444	1179.03
mir-183	541.191	146.404	188.157	59.4095	229.656	309.927	276.935	18.2581	225.356	145.52	2140.81	410.433	57.9397	66.312	95.865	162.538	208.602	177.882	106.175	70.4451	97.2489	1453.44
mir-184	127.644	78.1884	82.3189	4.90273	16.404	165.583	85.9778	3.39686	43.2916	11.2764	618.984	112.063	12.0424	17.3203	18.5246	32.5077	44.9925	68.1117	39.1171	11.2072	18.9705	374.857
mir-1843	22.3118	12.3665	17.6398	8.07508	11.2778	22.5401	17.8728	0.849214	11.2935	15.5722	139.799	32.2183	11.1335	11.3819	25.9345	37.6641	38.2729	42.9083	11.1763	13.6087	15.3761	239.675
mir-185	5.18879	1.19676	0	5.47952	14.3535	21.6732	11.6644	2.97225	4.44894	5.9067	72.884	5.60317	2.49936	2.96919	6.48362	6.50153	5.55103	11.8727	5.58815	7.60487	10.5836	65.2572
mir-186	136.465	37.0996	21.5597	49.8925	64.5908	378.847	66.788	18.6827	49.6228	86.4526	910.001	182.103	62.0296	39.0944	112.074	287.637	75.6692	268.698	72.646	165.506	109.63	1375.09
mir-187	1.55664	0	0	0	0	1.73385	0.564406	0.424607	0.342226	2.68486	7.30659	0	0.227214	1.97946	1.85246	2.01772	1.16864	2.70781	22.3526	2.00128	0.599069	34.9063
mir-188	0	0.39892	0	0	0	0.866927	1.88135	0	0	0	3.1472	0	0	0	0	0.224191	0	0.416585	145.292	0.200128	0	146.133
mir-18a	0	0	0	0	0	3.46771	0	0	0.171113	1.07394	4.71277	0	0	0.494866	0.926232	1.12095	0	0.833171	55.8815	0.800513	0.998449	61.0557
mir-1908	0	0	0	0.288396	0	0	0.752541	0	0.684452	0	1.72539	0	0	0	0	0.224191	0	0	0	0.200128	0	0.424319
mir-1909	0	0	0	0.576792	0	0	0	0	0	0	0.576792	0	0	0	0	0	0	0	0	0	0	0
mir-190b	0	0	0	0	26.6565	25.5744	0	7.64293	0	32.7553	92.6291	71.4405	25.6752	6.43325	76.8773	0	153.676	0	0	0	0	334.102
mir-191	100.144	56.2477	45.0794	97.1894	78.9443	342.003	211.84	28.0241	27.5492	0.536972	987.558	319.381	95.8845	39.0944	135.23	311.177	53.4651	134.974	145.292	106.068	97.0492	1437.61
mir-1910	0	0.39892	0	0	0	1.30039	0.564406	0	0.171113	0	2.43483	1.40079	0.227214	0	0	0.448382	0	0	0	0	0	2.07639
mir-1911	0	0	0	0	0	0	0	0	0	0	0	0	0	0	0	0.224191	0	0	0	0	0	0.224191
mir-1913	0	0	0	0	0	0	0.188135	0	0	0	0.188135	0	0	0	0	0	0	0	0	0	0	0
mir-1914	0	0	0	0	0	0	0	0	0	44.5687	44.5687	0	0	0	0	0	0	0.208293	55.8815	0	0	56.0898
mir-192	145.805	37.0996	52.9193	38.645	56.3888	181.188	70.5507	6.79371	46.5427	4.29578	640.229	198.913	28.629	33.6509	38.4386	80.7087	73.332	83.7337	55.8815	53.8345	49.5231	696.645
mir-193a	7.78319	0.39892	3.91995	5.19113	2.0505	26.8748	3.95084	1.69843	1.54002	3.75881	57.1665	9.80556	2.95379	4.45379	6.48362	6.27734	2.04511	9.78976	5.58815	9.60616	2.99535	59.9986
mir-193b	4.15103	0.39892	0	0	2.0505	3.03425	2.25762	0	0.342226	5.9067	18.1412	1.40079	1.13607	0	1.38935	2.4661	13.1472	3.33268	0	0	0.798759	23.6709
mir-194-1	3.63215	0.39892	1.95997	0.576792	4.101	12.5704	5.07965	0.849214	3.59337	6.44367	39.2052	14.0079	1.81772	1.4846	1.38935	9.41601	4.09023	7.08195	5.58815	2.40154	3.9938	51.2713
mir-194-2	5.70767	0.39892	0	0.865188	3.07575	12.5704	5.64406	0.849214	3.9356	0.536972	33.5838	15.4087	1.81772	1.4846	1.38935	9.41601	3.21375	6.87366	16.7645	3.00192	3.79411	63.1643
mir-195	0.518879	0	0	0	6.15151	1.30039	2.63389	0.849214	1.19779	0	12.6517	0	0	0.494866	0	0.896763	1.75296	1.45805	5.58815	1.00064	0.599069	11.7905
mir-196a-1	0	0	0	0	0	0.433464	0	0	0	0.536972	0.970436	1.40079	0	0	0	0	0	0	0	0.400256	0.19969	2.00074
mir-196a-2	0	0	0	0	0	0.866927	0	0	0	0	0.866927	0	0	0	0	0	0	0.208293	0	0.200128	0.39938	0.8078
mir-196b	0	0	0	0	0	0	0.188135	0	0	2.68486	2.873	0	0	0	0	0.224191	1.4608	0.833171	0	0.800513	0	3.31867
mir-197	1.55664	0.39892	3.91995	9.80546	1.02525	12.5704	2.63389	1.27382	2.39558	0	35.58	7.00397	0.227214	1.97946	1.85246	0.672572	5.25887	4.79073	402.347	1.4009	1.9969	427.53
mir-1972-1	0.518879	0	0	0	0	0.433464	0.564406	0.424607	0.171113	0	2.11247	0	0	0	0	0.224191	0	0	0	0	0.39938	0.62357
mir-1972-2	0	0	0	0	0	0	0	0.424607	0.855565	0	1.28017	0	0	0	0	1.34514	0	0	0	0	0.39938	1.74452
mir-1973	0	0	0	0	0	0	0	0	0	0	0	0	0	0.494866	0	0	0	0	0	0	0	0.494866
mir-1976	0	0	0	0.288396	0	0	0.188135	0	0	0.536972	1.0135	0	0	0	0	0	1.16864	0.208293	156.468	0	0.19969	158.045
mir-199a-1	2.07552	0.79784	1.95997	4.32594	0	14.3043	0.752541	0	0	0.536972	24.7531	5.60317	0.227214	0.989732	3.24181	1.34514	0	6.24878	16.7645	4.20269	4.19349	42.8165
mir-199a-2	1.55664	0.79784	0	3.46075	1.02525	13.8708	1.31695	0	1.02668	1.07394	24.1289	8.40476	0.227214	1.4846	3.24181	0	0	5.41561	22.3526	4.40282	4.19349	49.7229
mir-199b	1.03776	0.39892	0	5.47952	1.02525	32.0763	2.63389	0.849214	0.855565	2.14789	46.5043	15.4087	0.681643	1.97946	1.85246	3.81124	2.33727	6.24878	27.9408	7.40474	6.78945	74.4546
mir-19a	2.07552	0.39892	0	1.73038	7.17676	18.6389	1.88135	0.849214	1.19779	1.07394	35.0228	2.80159	0	0.494866	0.926232	3.13867	0.292159	3.12439	508.522	3.80244	3.79411	526.896
mir-19b-1	2.07552	0	0	2.01877	3.07575	6.06849	1.12881	0.424607	0.513339	0.536972	15.8423	0	0.681643	0	0.463116	2.24191	0.292159	3.74927	111.763	2.60167	1.39783	123.191
mir-19b-2	1.55664	0.39892	0	2.30717	2.0505	6.93542	0.940676	0	0.342226	4177.65	4192.18	0	0.454429	0.989732	0.926232	1.79353	0.584318	2.9161	5.58815	2.40154	1.19814	16.8522
mir-200a	5240.68	2247.92	1640.5	1323.74	2168.41	7995.24	2840.84	485.75	2564.3	3123.57	29630.9	11524.3	2555.03	2666.34	5465.7	12056.8	6245.49	13490.1	2615.26	4942.97	5797.19	67359.1
mir-200b	3038.56	999.295	972.147	983.718	2876.85	4668.84	3862.6	483.203	1462.85	1848.8	21196.9	5802.09	1253.09	1170.36	2900.96	6388.54	1979.96	4923.41	1737.92	1802.96	2463.57	30422.9
mir-200c	1491.26	347.858	439.034	534.974	1327.7	2425.66	2559.01	311.662	809.707	0	10246.9	3083.15	842.966	762.588	2445.25	3741.52	1007.07	3052.95	882.928	923.392	1297.38	18039.2
mir-203a	1.03776	0.39892	199.917	0.576792	0	1.30039	1.12881	0	0	183.108	387.468	1.40079	0.908858	0	4.16804	3.13867	0.292159	1.04146	5.58815	0.800513	0.798759	18.1374
mir-203b	593.598	123.266	0	100.362	546.459	668.835	315.315	42.4607	119.779	2.14789	2512.22	833.472	124.514	241.989	190.804	375.295	506.312	417.002	357.642	154.699	216.064	3417.79
mir-204	12.4531	0.79784	0	0.288396	9.22726	4.7681	10.9118	0.849214	1.54002	378.029	418.864	15.4087	1.36329	0.989732	0	2.24191	2.04511	2.29122	5.58815	1.00064	1.19814	32.1269
mir-205	606.57	112.097	164.638	64.0239	445.984	876.464	830.052	27.5995	339.146	1.07394	3467.65	725.611	83.8421	104.912	123.652	584.465	159.811	375.968	156.468	75.0481	156.557	2546.33
mir-20a	8.30207	1.19676	1.95997	13.2662	17.4293	20.3728	8.27795	3.39686	1.19779	1.07394	76.4736	11.2063	2.95379	3.46406	3.70493	6.94992	1.75296	6.45707	22.3526	9.60616	5.19193	73.6398
mir-20b	0	0	0	0.288396	0	0.866927	0	0	0	5865.89	5867.04	0	0	0	0	0.224191	0	0.208293	6353.73	1.00064	6070.97	12426.1
mir-21	6153.91	2391.93	1662.06	3109.2	7005.54	16326	5330.62	1171.07	3952.88	3.22183	47106.4	16463.5	3023.32	2970.18	5190.6	12709.2	5178.52	11672.3	6353.73	6931.44	0	70492.8
mir-210	3.63215	2.79244	7.83989	0.576792	6.15151	16.0382	16.744	0.424607	4.79116	0	58.9907	8.40476	2.72657	2.47433	6.94674	9.8644	8.47262	10.4146	16.7645	6.20398	2.79566	75.0681
mir-211	0	0.39892	1.95997	34.3191	0	35.544	0.752541	0	0	74.6392	147.614	0	0	0	0	0.896763	4.38239	0	0	0.200128	52.7181	58.1974
mir-2110	88.2095	31.1158	43.1194	0	48.1868	0	154.459	17.8335	37.6449	0.536972	421.106	110.663	47.2606	44.0431	181.541	91.0215	188.735	200.586	72.646	59.238	52.7181	1048.45
mir-2113	0	0	0	0	0	0	0.188135	0	0.342226	0	0.530361	0	0	0	0	0	2.33727	0	0	0	0	2.33727
mir-2114	0	0	0	0	0	0	0	0.424607	0	0	0.424607	0	0	0	0	0.448382	0	0.416585	11.1763	0.200128	0	12.2414
mir-2115	0	0	0	0	0	9.10274	0.188135	0	0.171113	0	9.46199	1.40079	0	0	0.926232	0	0	0.208293	5.58815	1.00064	0.798759	9.92287
mir-2116	0	0	0	0.288396	0	0.433464	0	0	0	0	0.72186	0	0	0	0	0	0	0	0	0	0	0
mir-212	1.55664	0	0	0.288396	0	2.16732	0.188135	0	1.19779	0	5.39828	4.20238	0	0	0	0.896763	1.16864	2.9161	162.056	2.00128	0.39938	173.641
mir-214	0	0	0	0	0	0	0.37627	0	0.684452	0	1.06072	0	0	0	2.31558	0	0	0.416585	89.4104	0.400256	0	92.5429
mir-215	5.70767	0.39892	3.91995	0.288396	3.07575	0.866927	0.940676	0	0.513339	0	15.7116	2.80159	0	0	0.463116	0.672572	0	1.45805	150.88	1.60103	0.998449	158.875
mir-217	0	0	0	0	0	0	0	0.424607	0	17.7201	18.1447	0	0	0	0	0	0.292159	0	0	0	0	0.292159
mir-218-1	29.5761	5.18596	5.87992	4.90273	12.303	31.6429	30.4779	5.09528	9.75344	17.7201	152.537	36.4206	10.2247	8.41272	8.7992	64.3428	18.406	20.2044	11.1763	6.00385	15.7755	199.766
mir-218-2	30.095	3.59028	5.87992	4.32594	11.2778	30.7759	30.8542	5.9445	8.21342	0.536972	131.494	44.8254	11.1335	5.93839	8.33609	65.2395	18.6982	19.9961	5.58815	5.80372	17.1733	202.732
mir-219a-1	0	0	0	0	1.02525	0	0.564406	0	0.342226	448.372	450.304	0	0	0	0	0	0	0.624878	162.056	0.200128	0.39938	163.281
mir-22	396.424	41.0888	99.9586	216.585	619.252	866.061	495.924	162.2	320.837	37.5881	3255.92	1164.06	191.087	324.632	215.349	670.331	496.379	905.657	162.056	255.964	224.851	4610.36
mir-221	70.0487	18.7492	11.7598	54.5068	78.9443	247.074	85.2252	19.5319	38.1582	110.079	734.078	197.512	59.7574	36.6201	53.2583	171.73	42.9474	212.25	89.4104	88.0564	82.6716	1034.21
mir-222	199.768	82.5765	45.0794	82.1928	115.853	729.086	218.989	45.0083	127.479	27.9226	1673.96	427.242	91.5674	133.614	120.41	274.634	217.659	355.972	150.88	145.093	131.596	2048.67
mir-223	22.8307	3.19136	1.95997	45.8549	20.505	540.096	14.2983	8.91675	5.47562	46.1796	709.308	58.8333	1.81772	2.47433	17.1353	24.8852	7.8883	30.2024	178.821	91.4586	66.4967	480.013
mir-224	105.332	51.0618	54.8793	27.3976	85.0958	247.074	134.517	13.5874	43.6338	0	762.579	266.151	41.8075	30.6817	62.0576	89.6763	130.887	108.729	33.5289	30.0192	51.52	845.058
mir-2276	0	0	0	0	0	0	0	0	0	0.536972	0.536972	0	0	0	0	1.56934	0.584318	0	0	0	0	2.15365
mir-2277	0	0	0	0.288396	0	0	0.37627	0	0.171113	0.536972	1.37275	0	0.454429	0	0	0.672572	0	1.04146	0	0.200128	0	2.36859
mir-2278	0	0	0	0.576792	0	0	0	0	0	0	0.576792	0	0	0	0	0.224191	0	0.624878	0	0	0	0.849069
mir-2355	0	0	0	0	0	3.46771	0	0	0	30.6074	34.0751	0	0	0	0	0.224191	0	0.416585	0	0.200128	0	0.840904
mir-23a	12.4531	6.38272	0	19.0341	25.6313	66.32	25.7745	6.79371	12.149	51.5494	226.088	78.4444	7.27086	7.91785	15.7459	44.8382	3.79807	64.9873	22.3526	15.61	21.3668	282.332
mir-23b	34.246	12.7654	1.95997	6.9215	32.808	35.9775	74.8778	3.82146	26.1803	0.536972	230.095	105.06	7.95251	12.8665	16.6722	112.095	62.2299	43.5332	44.7052	5.20333	19.7693	430.087
mir-23c	0	0	0	0	0	0	0	0	0	37.5881	37.5881	0	0	0	0	0.224191	0	0	0	0	0	0.224191
mir-24-1	33.2083	3.59028	7.83989	13.2662	36.909	46.3806	35.5575	5.51989	16.598	43.4948	242.364	39.2222	9.54301	7.42299	15.2828	49.5462	13.1472	41.242	5.58815	16.8108	19.3699	217.175
mir-24-2	52.4068	7.18056	13.7198	17.3038	47.1615	76.2896	49.2914	8.49214	25.1536	182.034	479.033	67.2381	12.2696	12.8665	27.787	66.5847	21.6198	62.4878	22.3526	24.6158	25.5603	343.382
mir-25	227.269	87.7624	72.519	145.928	136.358	789.771	174.589	44.1591	145.617	0	1823.97	455.258	73.6175	66.8069	128.283	254.008	205.096	296.401	173.233	200.328	189.905	2042.94
mir-2681	0	0	0	0	0	0	0	0	0	561.136	561.136	0	0	148.955	0	0.224191	0	0	0	0	0	149.179
mir-26a-1	888.321	204.247	309.676	247.732	274.767	1238.41	1671.2	36.0916	151.606	554.156	5576.21	1585.7	214.945	0	826.199	1444.46	260.022	615.297	1179.1	448.688	372.222	6946.63
mir-26a-2	890.397	205.045	297.916	246.867	287.07	1245.34	1670.64	40.3377	150.579	123.504	5157.7	1589.9	215.854	151.429	822.494	1449.62	260.898	613.214	1179.1	451.689	372.821	7107.02
mir-26b	112.078	15.9568	17.6398	118.242	124.055	359.775	216.355	16.5597	39.356	1855.24	2875.26	364.206	65.8922	43.5482	154.218	333.148	45.869	211.417	150.88	192.723	173.93	1735.83
mir-27a	1845.65	195.87	209.717	554.008	1557.36	4725.62	1813.06	445.837	1094.78	2067.88	14509.8	3198.01	504.643	805.147	1040.16	2937.35	1161.33	2419.11	938.81	831.333	1013.23	14849.1
mir-27b	3448.47	403.308	419.434	597.556	2349.88	2650.2	2804.72	576.616	1931.01	57.993	15239.2	4939.2	523.729	1182.23	875.289	2563.85	2385.77	1892.96	961.162	408.862	926.56	16659.6
mir-28	94.9549	34.7061	27.4396	28.8396	56.3888	182.055	79.0168	9.34135	54.5851	0	567.327	218.524	41.8075	35.1355	69.9305	133.169	97.289	142.264	78.2341	62.44	53.1175	931.911
mir-2861	0	0	0	0	0	0	0.188135	0	0.171113	0	0.359248	0	0	0	0	0.224191	0	0	0	0	0	0.224191
mir-296	0	0.39892	0	0	0	0.433464	0.564406	0	0.171113	352.254	353.822	0	0.681643	0	0.926232	1.34514	1.75296	2.29122	0	0.200128	0	7.19732
mir-29a	265.666	47.4715	60.7592	92.8635	186.596	468.141	310.423	40.3377	166.493	8.59156	1647.34	759.23	206.084	112.829	274.165	538.058	183.184	737.565	240.291	251.361	194.098	3496.86
mir-29b-1	7.26431	2.39352	0	3.74915	2.0505	9.5362	8.27795	0	2.22447	8.59156	44.0877	35.0198	7.49808	1.97946	14.3566	32.2835	2.33727	26.4532	11.1763	12.8082	8.98604	152.898
mir-29b-2	8.30207	1.9946	0	4.32594	3.07575	12.5704	8.46608	1.27382	2.05336	10.7394	52.8015	37.8214	7.27086	3.46406	15.7459	32.9561	2.62943	28.7444	5.58815	12.2078	8.18728	154.615
mir-29c	6.74543	0.79784	0	1.44198	11.2778	13.8708	11.2881	2.12303	5.3045	0	52.8495	25.2143	5.22593	6.92812	8.33609	13.8998	5.25887	25.62	11.1763	7.20462	7.18883	116.053
mir-300	0	0	0	0	0	0	0	0.849214	0	0.536972	1.38619	0	0	0	0	0	0	0	0	0	0	0
mir-301a	0	0	0	0	0	1.73385	0.188135	0	0	0.536972	2.45896	0	0	351.355	0	0	0	0.416585	0	0.600385	0	352.372
mir-3064	0	0	0	0	0	1.73385	0.940676	0	0	2.14789	4.82242	0	0	0	0.926232	0.672572	1.75296	0.208293	0	0	0	3.56005
mir-3065	0.518879	1.59568	0	0.288396	1.02525	1.73385	0.940676	0	0.171113	1341.36	1347.63	5.60317	0	0	0.926232	1.12095	1.75296	2.08293	0	0.200128	0	11.6864
mir-3074	1098.47	123.266	192.077	307.43	1153.41	1876.03	1163.62	261.133	616.691	327.016	7119.14	1224.29	241.529	0	551.571	1848	789.706	1273.29	402.347	490.514	491.437	7312.7
mir-30a	641.335	228.98	205.797	116.224	328.08	478.111	441.741	58.1712	250.681	10.7394	2759.86	1078.61	183.817	130.15	217.665	539.179	336.86	694.865	156.468	180.115	278.368	3796.1
mir-30b	11.9342	3.59028	0	1.44198	2.0505	16.9051	13.5457	0.424607	3.42226	16.6461	69.9608	32.2183	2.27214	1.97946	9.26232	19.0562	2.92159	9.99805	11.1763	2.8018	7.98759	99.6737
mir-30c-1	23.3496	7.57948	5.87992	8.36348	12.303	57.6507	53.0541	0.849214	16.0846	15.5722	200.686	30.8175	5.68036	0	17.1353	26.0061	5.84318	24.162	16.7645	12.2078	13.1795	151.796
mir-30c-2	27.5006	9.57408	3.91995	8.07508	9.22726	58.9511	54.5592	2.54764	17.7958	1261.89	1454.04	30.8175	6.13479	2.47433	17.1353	28.0239	7.8883	26.0366	11.1763	11.6074	14.5774	155.872
mir-30d	1796.88	408.494	838.869	436.343	1033.45	1437.8	1538.01	234.808	880.89	152.5	8758.04	2158.62	456.701	305.332	734.965	1169.83	1434.21	1707.79	508.522	437.48	608.455	9521.91
mir-30e	243.873	63.8272	70.559	78.7321	98.4241	449.935	191.333	31.8455	102.668	3.22183	1334.42	353	52.0321	38.1047	94.4757	241.678	119.201	184.547	111.763	119.877	102.84	1417.52
mir-31	4.66991	0	0	4.90273	13.3283	7.80235	5.26779	1.69843	1.02668	0	38.6961	22.4127	2.49936	6.92812	6.48362	7.3983	0	11.8727	5.58815	2.60167	6.19038	71.975
mir-3115	0	0	0	0	0	0	0.188135	0	0	0	0.188135	0	0	0	0	0	0	0	0	0	0	0
mir-3118-1	0	0	0	0	0	0	0.188135	0	0	0	0.188135	0	0	0	0	0	0	0	0	0	0	0
mir-3118-3	0	0	0	0	0	0	0	0	0	0	0	0	0	0	0	0	0	0	0	0	0.19969	0.19969
mir-3120	0	0	0	0	0	0	0.188135	0	0	0	0.188135	1.40079	0	0	0	0	0	0	0	0	0	1.40079
mir-3121	0	0	0	0	0	0	0.188135	0	0	0	0.188135	0	0	0	0	0	0	0	0	0	0	0
mir-3124	0	0	0	0	0	0.433464	0	0	0.171113	1.07394	1.67852	1.40079	0	0	0	0	0	0	0	0	0	1.40079
mir-3125	0	0	0	0.576792	0	0	0.188135	0	0.171113	0.536972	1.47301	0	0	2.47433	0	0.224191	0	0	0	0	0.599069	3.29759
mir-3127	0	0.39892	0	0	0	0.866927	0.37627	0.424607	0	0	2.06673	0	0	0	0	0.224191	1.4608	1.04146	0	0	0	2.72645
mir-3128	1.55664	0	0	0	0	0	0	0	0	0	1.55664	0	0	0	0	0	0	0	0	0	0	0
mir-3129	0	0	0	0	0	0	0.188135	0	0	0	0.188135	0	0	0	0	0.224191	0	0.208293	0	0	0.19969	0.632173
mir-3132	0	0	0	0	0	0.866927	0	0	0	0	0.866927	0	0	0	0	0	0	0	0	0	0	0
mir-3133	0	0	0	0	0	0	0	0	0	0.536972	0.536972	0	0	0	0	0	0	0.624878	0	0	0	0.624878
mir-3134	0	0	0	0	0	0	0.188135	0	0	5.36972	5.55786	0	0	0	0	0	0	0	0	0	0.39938	0.39938
mir-3135a	2.07552	1.19676	0	0.865188	1.02525	1.73385	1.88135	0	4.10671	0	12.8846	1.40079	1.81772	1.4846	0	0.896763	0.876478	1.24976	0	1.60103	3.59442	12.9215
mir-3135b	10.3776	0	0	2.88396	0	1.30039	9.03049	0	9.41122	0	33.0036	2.80159	1.81772	2.47433	2.31558	8.29506	2.62943	8.74829	0	4.60295	11.3823	45.0673
mir-3136	0	0	0	0	0	0	0	0	0	0	0	0	0	0	0	0.224191	0	0	0	0	0	0.224191
mir-3137	0	0	0	0	0	0	0	0	0.513339	0	0.513339	0	0	0	0	0	0	0	0	0	0	0
mir-3138	0	0	0	0	0	0	0	0	0	0	0	0	0	0	0	0	0	0.208293	0	0	0	0.208293
mir-3142	0	0	0	0	0	0	0	0	0	0.536972	0.536972	0	0	0	0	0.224191	0	0	0	0	0	0.224191
mir-3144	0	0	0	0	0	0	0	0	0	0	0	0	0	0	0	0	0	0.208293	5.58815	0	0	5.79645
mir-3149	0	0	0	0	0	0	0	0	0	0	0	0	0	0	0	0	0	0.208293	22.3526	0	0.39938	22.9603
mir-3150a	0	0	0	0	1.02525	2.16732	0.564406	0.424607	0.171113	0	4.3527	4.20238	0	0.494866	0	2.01772	2.04511	0.208293	16.7645	1.20077	0.39938	27.333
mir-3150b	0	0	0	0.288396	0	0.433464	0	0.424607	0	0	1.14647	0	0	0	0	0	0	0	0	0	0	0
mir-3154	0	0	0	0	0	0	0	0	0	0	0	0	0	0	0	0	0	0.208293	16.7645	0	0	16.9728
mir-3155b	0	0	0	0	0	0	0.188135	0	0	2.14789	2.33602	0	0	0	0	0	0	0	0	0	0	0
mir-3157	0	0	0	0	0	0.433464	0.564406	0	0.342226	3.22183	4.56193	0	0	0	0	0.224191	0	0.416585	5.58815	0.200128	0	6.42906
mir-3158-1	5.18879	1.59568	1.95997	0.865188	1.02525	2.16732	2.25762	0.424607	1.02668	9.12853	25.6396	1.40079	1.5905	0.989732	2.7787	3.36286	7.30398	2.9161	5.58815	1.60103	0.998449	28.5303
mir-3158-2	4.15103	1.59568	0	0.865188	1.02525	3.03425	1.69322	0.424607	1.02668	0	13.8159	2.80159	1.81772	0.989732	2.31558	2.91448	7.30398	2.9161	5.58815	1.60103	0.599069	28.8474
mir-3159	50.8502	2.39352	1.95997	40.3754	41.01	16.9051	33.4881	13.5874	48.425	0	248.995	5.60317	10.2247	17.8152	4.63116	6.50153	4.09023	5.8322	5.58815	14.2091	50.5215	125.017
mir-3163	0	0.79784	0	0	0	0	0	0	0	0	0.79784	0	0	0	0	0	0	0	0	0	0	0
mir-3164	0	0	0	0.576792	0	0	0	0	0.342226	0	0.919018	0	0	0.989732	0	0	0	0	0	0	0	0.989732
mir-3166	0	0	0	0	0	0	0	0	0	0	0	0	0	0	0	0	0	0.208293	50.2934	0	0	50.5017
mir-3173	0	0	0	0	0	0	0.188135	0	0	0	0.188135	0	0	0	0	0	0	0.208293	5.58815	0.400256	0	6.1967
mir-3174	0.518879	0	0	0	0	0	0.564406	0	0	0	1.08328	0	0	0	0	0	0	0	0	0.200128	0	0.200128
mir-3175	0	0	0	0	0	0.433464	0	0	0.342226	0.536972	1.31266	0	0	0	0.926232	0	0	0	0	0	0	0.926232
mir-3176	0	0	0	0	0	0	0	0	0	0	0	0	0	0	0.463116	0.224191	0	0	0	0	0	0.687307
mir-3177	2.5944	0.39892	0	0	2.0505	3.46771	3.38643	0	0.513339	0	12.4113	1.40079	0.681643	0	0.463116	0.448382	9.64125	0	0	0	0.599069	13.2343
mir-3179-1	0	0	0	0	0	0	0	0	0	0	0	0	0	0	0	0	0	0.208293	11.1763	0.200128	0	11.5847
mir-3179-2	0	0	0	0	0	0	0.188135	0	0	0	0.188135	0	0	0	0	0.224191	0	0.416585	11.1763	0	0	11.8171
mir-3179-3	0	0	0	0	0	0	0.188135	0	0	0	0.188135	0	0	0	0	0.224191	0	0.208293	33.5289	0	0	33.9614
mir-3179-4	0	0	0	0	0	0	0	0	0	0	0	0	0	0	0	0	0	0.208293	5.58815	0.200128	0	5.99657
mir-3180-1	0	0	0	0	0	0.433464	0	0	0	0	0.433464	0	0	0	0	0.224191	0.292159	0	5.58815	0	0	6.1045
mir-3180-2	0.518879	0.39892	0	0	0	0	0	0	0.171113	0	1.08891	0	0	0	0	0.224191	0.584318	0	5.58815	0	0	6.39666
mir-3180-3	0.518879	0	0	0	0	0	0	0	0.171113	0	0.689992	0	0	0	0	0.448382	0.292159	0.208293	5.58815	0.200128	0.19969	6.9368
mir-3180-4	0	0	0	0	0	0.866927	0	0	0	46.1796	47.0466	1.40079	0.681643	0.494866	0.463116	0.672572	0	0.624878	5.58815	0	0.19969	10.1257
mir-3180-5	0	0	0	0.288396	0	0.433464	0.37627	0	0.171113	0	1.26924	0	0.227214	0	0.926232	0	0	0.208293	33.5289	0	0	34.8907
mir-3184	69.0109	33.1104	43.1194	19.0341	29.7323	169.051	159.162	16.9843	62.9696	0	602.174	91.0516	21.1309	16.8254	68.0781	51.1155	219.996	122.476	39.1171	29.0186	23.3637	682.173
mir-3186	0	0	0	0	0	0	0	0	0.171113	0	0.171113	0	0	0	0	0	0.292159	0	0	0	0	0.292159
mir-3187	0	0	0	0	0	0	0.564406	0	0	0	0.564406	0	0	0	0	0	0	0.624878	16.7645	0	0	17.3893
mir-3188	0	0	0	0	0	0	0	0	0	0	0	0	0	0	0	0.224191	0	0	0	0	0	0.224191
mir-3189	0	0	0	0	0	0	0	0	0	0	0	0	0	0.494866	0	0	0	0	0	0	0	0.494866
mir-3190	0	0	0	0	0	0	0	0	0	0	0	0	0	0	0	0	0	0	0	0.200128	0	0.200128
mir-3191	0	0	0	0	0	0	0.188135	0	0	0	0.188135	0	0	0	0	0	0	0.208293	78.2341	0	0.19969	78.6421
mir-3193	0	0	0	0	0	0	0.188135	0	0	0	0.188135	0	0	0	0	0	0	0	0	0	0	0
mir-3194	0	0	0	0.576792	0	0	0.37627	0	0	0.536972	1.49003	0	0	0	1.38935	0	0	0.833171	0	0.400256	0	2.62278
mir-3195	1.55664	0	0	0	0	0	0.940676	0	1.54002	0	4.03733	0	0.454429	0.494866	0	0	0	0.416585	5.58815	0	0.998449	7.95248
mir-3196	0	0	0	0	0	0	0	0	0	0	0	0	0	0	0	0.224191	1.75296	0.208293	39.1171	0.200128	0	41.5026
mir-3198-1	0	0	0	0	0	0	0.188135	0	0	18.2571	18.4452	0	0	0	0	0	0	0	0	0	0	0
mir-3198-2	0	0	0	0	0	0	0.37627	0	0	0	0.37627	0	0	0	0	0	0.292159	0	0	0	0	0.292159
mir-32	20.7552	7.18056	1.95997	4.32594	15.3788	66.32	25.5864	4.67068	8.72676	0	154.904	33.619	3.181	5.93839	13.8935	25.5578	10.8099	23.9537	145.292	11.8076	12.1811	286.234
mir-3202-1	0	0	0	0	0	0	0	0	0	189.014	189.014	0	0	0.494866	0	0	0	0	0	0	0	0.494866
mir-3202-2	0	0	0	0	0	0	0	0	0	3.22183	3.22183	0	0	0.494866	0	0	0	0	0	0	0	0.494866
mir-320a	291.61	146.803	141.118	48.4505	143.535	852.19	547.285	66.6633	175.049	3.22183	2415.93	225.528	152.006	132.129	232.484	312.298	565.912	688.199	16.7645	199.528	176.925	2701.77
mir-320b-1	11.4153	5.18596	11.7598	3.17235	6.15151	24.274	24.6457	4.24607	6.33118	1.61092	98.7929	4.20238	4.7715	4.45379	4.63116	7.3983	28.0473	19.1629	11.1763	8.40539	5.39162	97.6407
mir-320b-2	10.8965	3.59028	5.87992	2.59556	9.22726	26.0078	23.8932	2.54764	6.50229	1.07394	92.2144	8.40476	4.31708	4.94866	5.09428	7.62249	26.5865	20.2044	5.58815	8.20526	6.19038	97.1619
mir-320c-1	0.518879	0.39892	1.95997	0	1.02525	2.16732	4.13897	0.424607	0.342226	0.536972	11.5131	2.80159	0.681643	1.97946	3.24181	1.79353	4.09023	3.74927	0	2.00128	1.39783	21.7366
mir-320c-2	1.03776	0	0	0	0	2.60078	4.32711	0	0.684452	0	8.6501	1.40079	0.908858	0.989732	3.70493	1.56934	4.09023	4.37415	5.58815	2.00128	1.39783	26.0253
mir-320d-1	1.03776	0	0	0.288396	0	1.30039	1.31695	0	0.171113	0	4.1146	0	0.227214	0.494866	0.926232	0.448382	1.4608	1.04146	0	1.00064	0.39938	5.99897
mir-320d-2	0.518879	0	0	0	0	0.866927	1.31695	0.424607	0.171113	0	3.29847	0	0	0	0	0.448382	0.584318	1.24976	0	0.600385	0.19969	3.08253
mir-320e	0	0	0	0	0	0.433464	0.188135	0	0	1.61092	2.23252	0	0	0	0	0	0	0	0	0.200128	0	0.200128
mir-323a	0	0	0	0	0	0	0	0	0	0	0	0	0	0	0	0.224191	0	0	0	0	0	0.224191
mir-324	5.18879	0	0	0.865188	2.0505	3.03425	1.69322	0.424607	1.54002	20.9419	35.7385	1.40079	1.13607	0.494866	1.38935	4.25963	2.33727	7.70683	0	1.00064	1.59752	21.323
mir-326	0	0	0	0	0	0.433464	0.752541	0	0	5.9067	7.0927	4.20238	0	0.494866	0.463116	0.224191	0.876478	1.66634	0	0.200128	0.19969	8.32719
mir-328	14.0097	3.19136	0	9.22867	9.22726	28.6086	40.0728	11.4644	11.1223	1.61092	128.536	18.2103	8.40694	5.93839	6.02051	5.82896	25.71	12.081	5.58815	4.00256	5.19193	96.9788
mir-330	11.4153	3.19136	1.95997	2.59556	2.0505	20.8063	6.3966	0.424607	1.54002	2.14789	52.5281	9.80556	3.40822	0.989732	1.38935	17.9353	13.4393	8.54	0	4.40282	2.59597	62.5062
mir-331	1.03776	0	0	0.576792	3.07575	2.16732	2.82203	0	0.342226	1.61092	11.6328	1.40079	0.454429	0.989732	2.7787	3.36286	6.4275	1.45805	0	0.200128	1.19814	18.2703
mir-335	6.74543	1.19676	3.91995	1.44198	4.101	3.90117	6.961	0.849214	3.59337	15.0352	47.7451	12.6071	2.04493	0.989732	4.16804	7.17411	7.59614	7.29025	0	2.40154	5.39162	49.6635
mir-338	1.55664	0	0	4.32594	2.0505	31.6429	3.01016	2.97225	0.342226	0	45.9006	0	0.227214	0	0	1.12095	0.876478	2.49951	0	3.60231	2.79566	11.1221
mir-339	12.972	3.19136	3.91995	5.19113	12.303	22.1067	17.3084	2.97225	9.2401	0	89.2049	26.6151	3.63543	6.43325	8.7992	23.7642	3.50591	6.04049	0	5.20333	5.59131	89.5882
mir-33a	1.03776	0	0	0.288396	0	0.433464	0.37627	0	0.342226	54.7712	57.2493	0	0	0	0	1.12095	0	0	0	0	0	1.12095
mir-33b	0	0	0	0	0	0	0.37627	0	0	44.0317	44.408	0	0.227214	0	0	0.448382	0	0.208293	0	53.034	0	53.9179
mir-340	70.5676	17.5525	35.2795	34.0307	54.3383	178.154	60.9558	12.3136	32.6826	18.794	514.668	126.071	24.0847	22.269	35.6599	88.7796	41.7788	72.9025	33.5289	0	53.3172	498.392
mir-342	47.218	18.7492	17.6398	9.22867	7.17676	133.507	47.5982	2.12303	28.5759	4.83275	316.649	26.6151	18.8588	17.8152	120.41	66.3605	117.74	112.686	55.8815	53.4342	32.9488	622.751
mir-345	13.4909	3.59028	1.95997	5.47952	12.303	49.8483	31.6067	3.39686	11.2935	389.305	522.274	29.4167	5.68036	4.45379	6.02051	39.6818	14.0236	27.9112	0	7.40474	7.38852	141.981
mir-34a	3.11327	0.39892	0	0.288396	0	2.16732	6.58473	0.424607	1.3689	5631.23	5645.58	5.60317	2.04493	0	1.85246	5.60477	1.75296	5.41561	0	0.200128	1.79721	24.2712
mir-34b	128.163	41.0888	43.1194	49.8925	51.2625	48.5479	198.671	29.2979	108.657	1.61092	700.311	326.385	72.2542	50.9712	144.492	255.578	246.875	429.916	72.646	60.6389	104.238	1763.99
mir-34c	4882.13	939.058	1154.42	1732.68	2129.45	931.08	3409.57	616.529	2272.38	0	18067.3	8592.47	1607.77	1628.6	3868.41	6406.03	3954.67	10178.4	1989.38	3231.87	2571.01	44028.6
mir-3529	1.55664	1.19676	0	1.15358	1.02525	7.80235	0.752541	0	0.171113	124.578	138.236	7.00397	2.27214	3.95893	5.55739	4.9322	0.876478	12.7059	0	11.2072	6.39007	54.9042
mir-3605	1.55664	1.59568	0	0	0	5.20156	1.12881	0	1.02668	0	10.5094	2.80159	0.681643	0	0.926232	1.56934	0	1.45805	11.1763	0.800513	0.798759	20.2124
mir-361	107.408	81.3797	105.839	21.0529	48.1868	320.33	69.4219	9.34135	81.9631	4.83275	849.755	170.897	37.9448	18.8049	90.7707	189.441	155.137	182.048	111.763	56.236	75.4827	1088.52
mir-3611	0	0	0	0	0	0	0	0	0	0	0	0	0	0	0	0.224191	0	0	0	0	0	0.224191
mir-3613	3.11327	0	0	2.01877	6.15151	13.0039	3.01016	0.849214	0.684452	9.6655	38.4968	4.20238	0.227214	0	0.463116	5.15639	0	2.08293	16.7645	4.60295	2.19659	35.696
mir-3614	0	1.19676	0	2.01877	0	11.7035	0	0	0	0	14.9191	0	0.227214	0.989732	0.926232	1.34514	0	1.87463	5.58815	1.4009	0.798759	13.1508
mir-3615	48.2558	20.3449	17.6398	22.7833	15.3788	197.226	22.3881	13.5874	14.3735	0.536972	372.514	26.6151	7.27086	17.8152	12.5041	23.9884	72.1633	51.4483	5.58815	14.8095	14.9767	247.18
mir-3616	0	0.79784	0	0	0	0.866927	0	0	0	0	1.66477	0	0	0	0.926232	0.896763	0.584318	0	0	0.800513	0.798759	4.00659
mir-3617	0	0.39892	0	0	0	0	0.564406	0.424607	0.684452	0	2.07238	0	0	0	0	0	0	0.833171	0	0.200128	0	1.0333
mir-362	0	0	0	0	0	0	0.188135	0	0	0	0.188135	0	0	0	0	0.896763	0	0	0	0	0.19969	1.09645
mir-3620	0	0	0	0.288396	0	0	0	0	0	12.3504	12.6388	0	0	0	0	0	0	0.416585	0	0.400256	0	0.816842
mir-3622a	0	0	0	0	0	0.433464	0.564406	0	0	0	0.997869	0	0	0	2.7787	0.672572	0	1.24976	0	0.400256	0	5.10128
mir-363	26.9817	12.3665	5.87992	5.47952	3.07575	102.731	10.5356	0.849214	11.2935	0	179.193	22.4127	4.31708	6.92812	36.1231	59.1864	25.71	64.1542	33.5289	43.8281	24.9612	321.15
mir-3648-1	2.07552	0	0	3.17235	3.07575	0	4.70338	0.424607	7.18675	0	20.6384	0	2.72657	0.989732	0.463116	2.91448	0.584318	0.833171	0	1.00064	4.59286	14.1049
mir-3648-2	0	0.39892	0	3.46075	2.0505	0.433464	4.89151	0.424607	8.21342	0	19.8732	0	2.72657	1.97946	0.463116	1.56934	0.876478	0.624878	5.58815	1.20077	5.19193	20.2207
mir-3651	0	0	0	0	0	0	0.188135	0	0	0	0.188135	0	0	0	0	0	0	0	0	0	0	0
mir-3652	0	0.79784	0	0	0	0	0.188135	0	0	0.536972	1.52295	0	0	0	0	0	0	0.416585	0	0	0	0.416585
mir-3659	0	0	0	0	0	0.433464	0	0	0	0.536972	0.970436	0	0	0	0	0	0	0.416585	0	0	0	0.416585
mir-365a	0	0	0	0	0	0	0	0	0.342226	0	0.342226	0	0	0	0	0	0	0	0	0	0	0
mir-365b	1.03776	0	1.95997	0	0	0	0.37627	0	0.171113	0	3.54512	0	0	0	0	0	0	0	0	0	0	0
mir-3661	0	0	0	0	0	0	0	0	0	0	0	0	0	0	0	0	0	0	0	0	0.19969	0.19969
mir-3663	0	0	0	0	0	0	0	0	0.855565	0	0.855565	0	0	0	0	0	0	0	0	0	0	0
mir-3664	0	0	0	0	0	0	0.188135	0	0.342226	0	0.530361	2.80159	0.454429	0	0	0	1.75296	0.416585	0	0.200128	0.19969	5.82538
mir-3665	4.15103	2.79244	0	7.2099	8.20201	0.866927	5.83219	1.27382	5.3045	0.536972	36.1698	1.40079	2.04493	5.93839	0.926232	2.24191	1.4608	0.624878	0	1.20077	3.9938	19.8325
mir-3675	0	0	0	0	0	0	0	0	0	0	0	0	0	0	0	0	0	0	0	0	0.39938	0.39938
mir-3678	0	0	0	0	0	0	0.188135	0	0	0	0.188135	0	0	0	0	0	0	0	0	0	0	0
mir-3679	0.518879	0	1.95997	0	0	0.433464	0.564406	0	0.513339	0	3.99006	5.60317	0	0	0	0.448382	0.292159	1.87463	0	0.800513	0	9.01886
mir-3681	0	0	0	0	0	0	0	0	0.171113	0	0.171113	0	0	0	0	0	0	0	0	0	0	0
mir-3682	0	0	0	0	0	0.866927	0	0	0	0	0.866927	0	0	0	0	0	0	0	0	0	0.19969	0.19969
mir-3684	0	0	0	0	0	0	0	0	0.171113	0	0.171113	0	0	0	0	0	0	0	0	0	0	0
mir-3685	0	0	0	0	0	0.433464	0	0	0	0	0.433464	0	0	0	0	0	0	0	0	0	0	0
mir-3688-2	0	0	0	0	0	0	0.188135	0	0	0	0.188135	0	0	0	0	0	0	0	0	0	0	0
mir-369	0	0	0	0	0	0	0.37627	0	0	0	0.37627	0	0	0	0	0	0	0	0	0	0	0
mir-3690-1	1.03776	0.39892	0	0.288396	0	1.30039	0	0	0.342226	0	3.36769	0	0	0	0	0.224191	0.584318	0.416585	0	0.200128	0	1.42522
mir-3690-2	1.03776	0	1.95997	0.288396	0	2.16732	0	0	0.513339	0.536972	6.50376	0	0	0	0	0	0.584318	0.208293	0	0.600385	0.19969	1.59269
mir-370	0	0	0	0	0	0.433464	1.50508	0	0.171113	0	2.10966	0	0	0	0	0.448382	0	0	0	0.200128	0	0.64851
mir-371b	0	0	0	0	0	1.30039	0	0	0	4.29578	5.59617	0	0	0	0	0	0	0	0	0	0.19969	0.19969
mir-374a	0	0	0	0	0	0	0	0	0	0	0	0	0	0	0	0	0	0	0	0	0	0
mir-374b	6.74543	2.79244	1.95997	1.15358	2.0505	15.1712	5.83219	0	1.54002	1290.88	1328.13	14.0079	2.04493	0.494866	4.63116	8.96763	4.09023	4.37415	11.1763	6.00385	4.19349	59.9845
mir-374c	0	0	0	0.288396	0	912.875	0	0	0	106.321	1019.48	1.40079	0	0	0	0	0	0	0	0.200128	0	1.60092
mir-375	1990.94	418.467	1109.34	462.299	1635.28	0	1444.5	484.901	1118.22	0	8663.95	1518.46	355.363	445.379	929.011	2213.66	2673.55	1800.69	167.645	276.577	298.536	10678.9
mir-378a	390.716	82.9754	152.878	83.6348	313.727	313.828	222.94	33.9686	109.512	0	1704.18	264.75	35.8999	39.5893	67.6149	194.373	427.429	159.552	178.821	74.4477	73.2861	1515.76
mir-378b	0	0	0	0	0	0	0.37627	0	0	0	0.37627	0	0	0	0	0	0	0	0	0	0	0
mir-378c	2.07552	0	0	1.44198	2.0505	6.06849	2.44576	1.27382	1.19779	0	16.5539	4.20238	0	0.494866	1.38935	1.34514	0.876478	2.29122	0	1.4009	1.19814	13.1985
mir-378d-1	0	0	0	0	1.02525	0	0.37627	0	0	0	1.40152	0	0	0	0	0	0	0.208293	0	0.200128	0	0.408421
mir-378d-2	0.518879	0	0	0	4.101	3.46771	3.01016	0.424607	2.90892	0	14.4313	2.80159	0	0	4.63116	2.24191	0.292159	1.66634	0	0.800513	1.39783	13.8315
mir-378e	0	0	0	0	1.02525	0	0	0	0	0	1.02525	0	0	0	0	0	0	0.208293	0	0	0	0.208293
mir-378f	1.55664	0.79784	0	0	2.0505	1.30039	1.31695	0	0.171113	0	7.19343	0	0.454429	0	0.463116	1.56934	2.04511	1.45805	0	0.600385	0.599069	7.1895
mir-378g	1.03776	0	0	0	1.02525	1.30039	0.37627	0.424607	0.342226	6.44367	10.9502	0	0	0.494866	0	0	0.876478	0.208293	0	0.400256	0.19969	2.17958
mir-378h	0	0	0	0	0	0	0.188135	0	0.513339	0	0.701474	0	0	0	0	0	0	0	0	0	0	0
mir-378i	19.1985	3.59028	0	4.32594	11.2778	15.6047	12.6051	3.82146	5.98896	0	76.4127	40.623	2.95379	2.47433	0	9.8644	12.855	5.6239	5.58815	2.40154	3.9938	86.3779
mir-379	0	0	0	0	0	0.433464	1.88135	0	0	0	2.31482	0	0	0	0	0	0	0	0	0	0	0
mir-381	0	0	0	0	0	0.866927	2.25762	0	0.171113	0	3.29566	0	0	0	0	0.448382	1.16864	0	0	0.400256	0.19969	2.21696
mir-382	1.03776	0	0	0.288396	0	0.433464	0.564406	0	0	0	2.32402	0	0	0	0	0.224191	0	0	0	0.200128	0	0.424319
mir-384	0	0	0	0	0	0	0	0	0.342226	1.07394	1.41617	0	0	0	0	0	0	0	0	0	0	0
mir-3908	0	0	0	0.576792	0	0.433464	0.188135	0.849214	0.513339	0	2.56094	1.40079	0.227214	0.494866	0	0.224191	0	0.833171	0	1.00064	0.39938	4.58026
mir-3909	1.03776	0	0	0.288396	0	2.60078	2.25762	0.849214	1.19779	0	8.23156	1.40079	0.227214	0	0.463116	0.672572	2.62943	1.24976	0	1.00064	0.39938	8.04291
mir-3911	0	0	0	0	0	0.433464	0.940676	0	0.513339	1.07394	2.96142	0	0.227214	0	0	0.224191	0	0.624878	0	0.800513	0	1.8768
mir-3912	0	0	0	0	0	1.30039	0	0	0.342226	0.536972	2.17959	0	0	0	0.463116	0.448382	0	0	0	0	0	0.911498
mir-3913-1	2.5944	0.79784	0	0.288396	1.02525	1.30039	0.564406	0.849214	1.19779	0	8.61768	2.80159	1.36329	1.4846	0.463116	2.01772	1.16864	1.24976	0	0.200128	1.79721	12.546
mir-3913-2	3.63215	0.79784	1.95997	0.865188	1.02525	1.73385	0.37627	0	1.02668	0	11.4172	1.40079	1.36329	2.96919	0.463116	2.01772	1.16864	1.45805	0	0.200128	1.39783	12.4388
mir-3918	0	0	0	0	0	0.433464	0.564406	0	0.171113	0	1.16898	0	0	0	0	0.224191	0	0.833171	0	0.200128	0	1.25749
mir-3922	0	0	0	0	0	0	0.188135	0	0	0	0.188135	0	0	0	0	0	0	0	0	0	0.19969	0.19969
mir-3924	0	0	0	0.288396	0	0	0	0	0	0	0.288396	0	0	0	0	0	0	0	0	0	0	0
mir-3927	0	0	0	0	0	0	0.188135	0	0	2.68486	2.873	0	0	0	0	0	0	0.208293	0	4.00256	0.39938	4.61024
mir-3928	0	0	0	0	0	1.30039	0	0	0	0	1.30039	0	0	0	0	0	0	0.624878	0	53.2341	0	53.859
mir-3929	8.82095	0.79784	0	10.959	11.2778	2.60078	7.33727	3.39686	10.9512	0.536972	56.6787	1.40079	2.95379	3.95893	3.24181	1.56934	1.16864	1.66634	5.58815	0	16.1749	37.7227
mir-3934	0	0	0	0	0	0.433464	0.37627	0	0.171113	0	0.980847	0	0	0	0	0.224191	0	0.208293	0	0	0	0.432484
mir-3936	2.5944	0	0	0	0	0	0.188135	0	0.513339	0	3.29587	0	0	0	0	0	0	0	0	0	0	0
mir-3940	0	0	0	0	0	0	0	0	0	0.536972	0.536972	0	0	0	0	0	0	0.208293	0	0	0	0.208293
mir-3941	1.03776	0.39892	0	0	0	0	0	0	0	26.3116	27.7483	0	0	0	0	0	0	0	0	0	0	0
mir-3944	0	0	0	0	0	0.433464	0.37627	0	0	0	0.809734	0	0	0	0	0	0	0.624878	0	0	0	0.624878
mir-3960	549.493	25.5309	7.83989	395.968	755.61	47.681	263.389	70.9094	360.535	0	2476.96	28.0159	81.57	721.514	25.4714	86.5377	73.6241	34.9932	78.2341	0	356.646	1486.61
mir-409	0.518879	0	0	0	0	0.866927	1.88135	0	0	0	3.26716	1.40079	0	0	0	0	0	0	0	0	0.39938	1.80017
mir-411	0	0	0	0	0	0	1.12881	0	0	3.22183	4.35065	0	0	0	0	0	0	0	0	0	0	0
mir-412	0	0	0	0	0	0	0.188135	0	0	0	0.188135	0	0	0	0	0	0	0	0	0	0	0
mir-421	1.55664	0.39892	0	0.288396	6.15151	12.137	4.13897	0.849214	1.88224	491.867	519.27	1.40079	0.227214	0	2.31558	5.60477	2.92159	1.45805	0	2.8018	0.798759	17.5286
mir-422a	4.15103	0.79784	3.91995	0.288396	2.0505	1.30039	2.82203	0	0.513339	0.536972	16.3804	2.80159	0	0.989732	0	0.672572	4.38239	0.833171	0	0.600385	0	10.2798
mir-423	860.821	279.643	597.792	127.471	172.242	1389.25	923.556	115.068	456.187	15.0352	4937.07	722.81	240.166	143.016	543.698	750.591	2767.04	1380.56	391.171	254.363	197.493	7390.91
mir-424	1.03776	0.79784	0	3.74915	1.02525	23.407	1.31695	1.69843	0.684452	0	33.7169	0	0	0	0	0	0	3.12439	5.58815	3.60231	1.59752	13.9124
mir-425	18.6796	26.7277	5.87992	9.22867	6.15151	85.8258	24.4576	2.12303	9.92455	0	188.998	28.0159	7.95251	3.46406	19.4509	29.5932	13.4393	23.7454	50.2934	14.009	15.7755	205.739
mir-4277	0	0	0	0	0	0	0	0	0	1.07394	1.07394	0	0	0	0	0	0	0.416585	0	0	0	0.416585
mir-4284	0	0	0	0	0	1.30039	0.752541	0	0	686.788	688.841	2.80159	0.227214	0	0	0	0	0	0	0	0	3.0288
mir-4286	0	0	0	0	0	0.433464	0	0	0	0	0.433464	0	0	0	0	1.34514	0	0	0	0	0	1.34514
mir-429	708.27	68.6143	101.919	167.846	538.257	760.295	514.926	109.124	358.311	0	3327.56	753.627	179.499	134.109	229.242	998.098	310.857	619.879	156.468	220.741	296.739	3899.26
mir-4291	0	0	0	0	0	0	0	0	0	0	0	0	0	0.494866	0	0	0	0	0	0	0	0.494866
mir-4295	0	0	0	0	0	0	0	0.424607	0	0	0.424607	0	0	0	0	0	0	0	0	0	0	0
mir-431	0	0	0	0	0	0	0	0.424607	0	0	0.424607	0	0	0	0	0	0	0	0	0	0	0
mir-432	0.518879	0	0	0	0	0	1.88135	0	0	1.07394	3.47418	0	0	0	0	0	0	0	0	0	0	0
mir-4321	0	0	0	0	0	0	0	0	0	0	0	0	0	0	0	0	0	0	0	0.200128	0	0.200128
mir-4326	0	0	0	0	0	0	0	0.424607	1.02668	0	1.45129	0	0	0	0	1.12095	0	1.24976	0	0.400256	0.998449	3.76942
mir-4418	0	0	0	0	1.02525	0	0	0	0	0	1.02525	0	0	0	0	0	0	0	0	0	0	0
mir-4422	0	0	0	0	0	0	0	0	0	1.07394	1.07394	0	0	0	0	0	1.4608	0	0	0	0	1.4608
mir-4423	0	0	0	0.288396	0	0	0.564406	0	0	0	0.852801	0	0	0	0	0	0	0	0	0	0	0
mir-4424	0	0	0	0	0	0.866927	0	0	0	0.536972	1.4039	0	0	0	0	0	0	0	0	0	0	0
mir-4425	0	0	0	0	0	0	0	0	0.171113	1.61092	1.78203	0	0	0	0	0	0	0	0	0	0.39938	0.39938
mir-4429	0	0	0	0	0	0	0.752541	0	0	0	0.752541	0	0	0	0	0	0	0	0	0	0	0
mir-4430	13.4909	1.59568	0	8.65188	11.2778	1.73385	6.77287	2.97225	9.92455	0	56.4197	11.2063	2.49936	5.44352	1.85246	2.24191	2.62943	1.24976	0	3.00192	8.38697	38.5117
mir-4431	0	0	0	0	0	0	0	0	0	0	0	0	0	0	0	0.224191	0	0.208293	0	0	0	0.432484
mir-4433b	0	0	0	0	0	0	0	0	0	0	0	0	0.227214	0	0	0	0	0	0	0	0	0.227214
mir-4436b-1	0	0	0	0.288396	0	0	0	0	0	0	0.288396	0	0	0	0	0.224191	0.292159	0.208293	0	0	0	0.724643
mir-4436b-2	0	0	0	0	0	0.433464	0	0	0	0	0.433464	0	0	0	0	0	0	0	0	0	0	0
mir-4440	0	0	0	0	0	0.866927	0.37627	0.424607	0	3.75881	5.42661	0	0	0	0	0	0	0	5.58815	0.200128	0.19969	5.98797
mir-4444-1	0	0	0	0	0	0	0	0	0	0	0	0	0	0	0	0	0	0	0	0	0	0
mir-4444-2	0	0	0	0	0	0	0	0	0	0	0	0	0	0	0	0	0	0.208293	0	0	0	0.208293
mir-4446	11.4153	3.19136	1.95997	1.15358	1.02525	8.66927	13.7339	2.12303	9.06899	1.07394	53.4146	16.8095	7.04365	2.96919	19.914	7.17411	39.4415	31.2439	11.1763	3.60231	1.39783	140.772
mir-4448	0.518879	0.39892	0	0	0	1.30039	0.37627	0	0.171113	0	2.76557	0	0	0	0.463116	0.224191	2.92159	0.624878	0	1.4009	1.39783	7.0325
mir-4449	0	0	0	1.15358	1.02525	0.433464	1.31695	0	1.54002	0	5.46926	0	0.227214	0.494866	0	0	0	0.833171	0	0.400256	0.19969	2.1552
mir-4452	1.03776	0	0	1.15358	0	0.433464	0	0	0.171113	0	2.79592	0	0.227214	0	0	1.34514	0	0	0	0.400256	0.998449	2.97106
mir-4454	0	0	0	0	1.02525	2.60078	0.37627	1.69843	0	0	5.70073	0	0	0	0	0	0	0	0	0.600385	0	0.600385
mir-4466	0	0	0	0	0	1.73385	0	0	0.513339	0.536972	2.78417	0	0	0	2.31558	0.224191	0	0.208293	0	0	0	2.74806
mir-4467	0	0	0	0	0	0	0.940676	0	0	0.536972	1.47765	0	0	0	0	0.224191	1.4608	0	0	0	0.798759	2.48375
mir-4470	0	0	0	0	0	0	0.37627	0	0	0	0.37627	0	0	0	0	0	0	0	0	0	0	0
mir-4472-2	8.30207	0.39892	0	3.17235	4.101	3.03425	3.57457	2.12303	4.62005	0	29.3262	5.60317	1.13607	1.4846	0.926232	1.56934	0	1.04146	0	3.00192	4.19349	18.9563
mir-4473	0	0.39892	0	0	0	0	1.69322	0.424607	0	0.536972	3.05372	0	0.454429	0	0	0.448382	0	0.416585	0	0	0	1.3194
mir-4474	0	0	0	0	0	0	0	0	0	1.61092	1.61092	0	0.227214	0	0	0	0	0	0	0.400256	0	0.627471
mir-4477a	0	0.39892	0	0	0	0	0	0	0	0	0.39892	0	0	0	0	0	0	0	0	0	0.19969	0.19969
mir-4477b	0	0	0	0	0	0.866927	0	0	0	0	0.866927	0	0	0	0	0	0	0	0	0	0.19969	0.19969
mir-4485	10.3776	2.39352	0	1.15358	10.2525	7.80235	7.52541	2.54764	2.5667	0	44.6193	12.6071	4.54429	1.97946	2.7787	0.224191	20.159	7.91512	0	0.800513	1.79721	52.8056
mir-4488	2.5944	1.19676	0	1.73038	0	0.433464	2.06949	0	3.9356	0	11.9601	0	0	0.989732	2.31558	0	10.5177	1.66634	0	2.20141	1.9969	19.6877
mir-4489	0	0	0	0.576792	0	0.433464	0	0	0	0	1.01026	0	0	0	0	0	1.4608	0.208293	0	0	0	1.66909
mir-4491	0	0	0	0	1.02525	0	0	0	0	0	1.02525	0	0	0	0	0.448382	0	0.416585	0	0	0	0.864967
mir-4493	0	0	0	0	0	0.433464	0	0	0	0	0.433464	0	0	0	0	0	0	0	0	0	0	0
mir-4496	0	0	0	0	0	0	0.188135	0	0.171113	73.5652	73.9245	0	0	0	0	0	0	0	0	0	0.599069	0.599069
mir-4497	0	0	0	0	0	0	0	0.424607	0	4.83275	5.25736	0	0	0	0	0	0	0	0	0	0	0
mir-4498	0	0	0	0	0	0	0.188135	0	0	52.0863	52.2745	0	0	0	0	0	0	0	0	0	0	0
mir-449a	50.3313	57.4445	21.5597	58.8328	76.8938	348.071	78.4524	11.889	89.321	0	792.796	348.798	88.6136	16.8254	62.5207	364.31	73.332	118.727	106.175	89.2572	117.018	1385.58
mir-449b	4.15103	7.18056	1.95997	15.5734	6.15151	46.8141	5.83219	1.27382	5.81784	0	94.7544	46.2262	5.68036	3.95893	13.8935	81.1571	7.59614	11.8727	5.58815	15.2097	9.58511	200.768
mir-449c	45.1425	183.503	35.2795	44.7014	18.4545	763.33	113.257	8.91675	88.9788	0	1301.56	211.52	104.746	22.7638	87.992	258.044	185.229	192.254	122.939	100.264	125.205	1410.96
mir-4504	0	0	0	0.288396	0	0.433464	0	0	0	1.07394	1.7958	0	0	0	0	0	0	0.624878	5.58815	0	0	6.21303
mir-4508	0	0	1.95997	0.288396	0	0	1.12881	0	0.171113	0	3.54829	0	0	0	0	0	0	0.833171	0	0	0	0.833171
mir-450a-1	1.55664	0.39892	0	1.73038	0	9.5362	0	0	0.684452	0.536972	14.4436	1.40079	0	0	0	0.224191	0.584318	1.04146	0	2.20141	1.39783	6.85001
mir-450a-2	3.11327	0	0	1.73038	0	9.96967	0.37627	0	0.171113	0	15.3607	1.40079	0	0	0	0	0.876478	1.24976	0	3.20205	1.79721	8.52629
mir-450b	1.55664	0	0	0.865188	0	3.03425	0	0	0	0	5.45607	0	0	0.494866	0	0.224191	0	0	0	0.200128	0.599069	1.51825
mir-4510	0	0	0	0	0	0.866927	1.12881	0	0.513339	0	2.50908	1.40079	0	0.494866	0.463116	0.224191	0.292159	0	0	0	0.19969	3.07482
mir-4511	0.518879	0	0	0	0	0	0	0	0	0	0.518879	0	0	0	0	0.224191	0	0	0	0	0.39938	0.62357
mir-4512	0	0	0	0.288396	0	0	0.752541	0	0.342226	7.51761	8.90078	1.40079	0.454429	0	0	0.896763	0	0.416585	0	0.200128	0.39938	3.76808
mir-4515	0	0	0	0	0	0	0	0	0	0	0	0	0	0	0	0.224191	0	0	0	0.400256	0	0.624447
mir-4516	0	0	0	0	0	0	2.25762	0	0.513339	7.51761	10.2886	0	0.681643	0.494866	0	0.672572	0	0	0	0.600385	1.19814	3.6476
mir-451a	26.4628	3.59028	1.95997	8.65188	3.07575	86.2593	0	4.24607	0	0	134.246	1.40079	0	0	37.5124	0	26.0022	157.469	78.2341	0	0	300.619
mir-451b	0	0	0	0	0	0	0	0	0	0	0	0	0	0	0.463116	0	0	0	0	0	0	0.463116
mir-452	7.78319	1.9946	1.95997	8.07508	19.4798	24.274	8.46608	4.24607	2.22447	0	78.5032	22.4127	2.04493	6.43325	5.09428	8.29506	2.62943	7.70683	11.1763	4.60295	0	70.3957
mir-4520-1	0	0	0	0	0	0	0.188135	0.424607	0	0	0.612742	0	0	0	0	0	5.84318	0.833171	0	0	0	6.67636
mir-4520-2	0	0	0	0	0	0	0	0	0	0	0	0	0	0	0	0	0	0.416585	0	0	0.19969	0.616275
mir-4521	0	0	0	0	0	0	0.188135	0	0	0	0.188135	0	0	0	1.38935	0.224191	0	0.416585	0	0	0.19969	2.22981
mir-4522	0	0	0	0	0	0	0.37627	0	0	0	0.37627	0	0	0	0	0	0	0	0	0	0	0
mir-4524a	0	0	0	0	1.02525	0	0	0	0	0	1.02525	0	0	0	0	0	0	0	0	0	0	0
mir-4524b	0	0	0	0	1.02525	0	0	0	0	0	1.02525	0	0	0	0	0	0	0	0	0	0	0
mir-4525	0	0	0	0	0	0	0.188135	0	0	0	0.188135	0	0	0	0	0	0	0	0	0	0	0
mir-4529	0.518879	0.39892	0	0	0	0.433464	0.37627	0	0	0	1.72753	0	0	0.494866	0.926232	0.896763	0	0.416585	0	0	0	2.73445
mir-4536-1	0	0	0	0	0	0.433464	0.188135	0	0	11.8134	12.435	0	0	0	0	0	0	0	0	0	0	0
mir-4536-2	0	0	0	0	0	0	0.188135	0	0	0	0.188135	0	0	0	0	0	0	0	0	0	0	0
mir-4537	0	0	0	0	0	0	0	1.27382	0	0	1.27382	0	0	0	0	0	0	0	0	0	0	0
mir-4539	0.518879	0	0	0	0	0	0.37627	0	0	0	0.89515	0	0	0	0	0	0	0	0	0	0	0
mir-454	0.518879	0	0	0.288396	0	1.30039	0.188135	0	0.513339	0	2.80914	0	0.227214	0.989732	0	0.224191	0	0.833171	0	0.600385	0.39938	3.27407
mir-455	6.22655	5.18596	7.83989	0.865188	3.07575	8.66927	7.71354	0.424607	2.05336	0	42.0541	7.00397	1.36329	1.97946	2.7787	7.17411	0	2.29122	22.3526	1.4009	2.19659	48.5408
mir-4634	0	0	0	0.288396	0	0	0	0	0.171113	0.536972	0.996481	0	0	0	0	0	0	0	0	0	0	0
mir-4635	0	0	0	0	0	0	0	0	0	0	0	0	0	0	0	0	0	0.208293	0	0	0	0.208293
mir-4638	0	0	0	0	0	0.433464	0	0	0	0	0.433464	0	0	0	0	0	0.876478	0	0	0	0.19969	1.07617
mir-4639	0	0	0	0.288396	0	0	0	0	0	0	0.288396	0	0	0	0	0.672572	0.584318	0	0	0	0.599069	1.85596
mir-4640	0	0	0	0	0	0	0	0	0	1.07394	1.07394	0	0.227214	0	0	0	0	0	0	0	0	0.227214
mir-4645	1.03776	0	0	0	0	0.433464	0	0	0.342226	0.536972	2.35042	0	0	0	0.463116	0	0	0.208293	0	0	0	0.671409
mir-4648	0	0	0	0	0	0.866927	0.188135	0	0	0	1.05506	0	0	0	0	0	0	0.208293	0	0	0	0.208293
mir-4650-1	0	0	0	0	0	0	0	0	0	0	0	0	0	0.494866	0	0	0	0	0	0	0	0.494866
mir-4652	0.518879	0	0	0	0	0	0.188135	0	0	0	0.707014	0	0	0	0	0.672572	0.584318	0.208293	0	0	0	1.46518
mir-4654	0	0	0	0	0	0	0.37627	0	0	0	0.37627	0	0	0	0	0	0.584318	0	0	0	0	0.584318
mir-4658	0	0	0	0	0	0.433464	0	0	0	2.14789	2.58135	0	0	0	0.463116	0.224191	0.876478	0.208293	0	0.600385	0.599069	2.97153
mir-4659a	0	0	0	0	0	0	0	0.424607	0	0.536972	0.961579	0	0	0	0	0	0	0.208293	0	0.200128	0	0.408421
mir-4659b	0	0	0	0	0	0	0	0	0	1.07394	1.07394	0	0	0	0	0.224191	0	0.416585	0	0	0	0.640776
mir-466	0	0	0	0	0	0.433464	0	0	0	0	0.433464	0	0	0	0	0	0	0	0	0	0	0
mir-4661	0.518879	0	0	0	1.02525	0.866927	1.69322	0	1.19779	0	5.30207	2.80159	0.227214	0	4.16804	0.448382	3.50591	1.45805	0	0.200128	0.798759	13.6081
mir-4662a	1.55664	0	0	0.576792	1.02525	0	2.25762	0	1.19779	0	6.61409	1.40079	0	0	0	2.01772	0	2.08293	0	0.400256	0	5.90169
mir-4664	0	4.38812	3.91995	0	0	4.33464	1.12881	0.424607	1.88224	0	16.0784	0	0.227214	0.494866	0	0.224191	6.4275	1.24976	0	1.00064	0.39938	10.0236
mir-4666a	0	0	0	0	0	0.433464	0	0	0	0	0.433464	0	0	0	0	0.448382	0	0	0	0	0	0.448382
mir-4667	0	0	0	0.288396	0	0	0.564406	0	0	1.07394	1.92675	0	0.454429	0	0.463116	0	2.33727	0	0	0	0.19969	3.45451
mir-4668	0	0	0	0	0	0.433464	0	0	0.171113	0	0.604577	0	0	0	0	0	0	0	0	0	0.19969	0.19969
mir-4671	0	0	0	0	0	0.433464	0	0	0	0	0.433464	0	0	0	0	0	0	0	0	0	0	0
mir-4676	0	0	0	0	1.02525	0	0	0	0	0	1.02525	0	0	0	0	0	0	0	0	0	0	0
mir-4677	0.518879	0	0	0	3.07575	3.90117	0	0.424607	1.19779	0	9.1182	2.80159	0	0	0	2.4661	0	0.833171	0	0.200128	0.19969	6.50068
mir-4679-1	0	0	0	0	0	0	0	0	0	0	0	0	0	0	0	0	0.584318	0	0	0	0	0.584318
mir-4679-2	0	0	0	0	0	0	0.188135	0	0	0	0.188135	0	0	0	0	0	0.292159	0	0	0	0	0.292159
mir-4680	0	0	0	0	0	0	0.188135	0	0	0.536972	0.725108	0	0	0	0	0	0	0	0	0	0	0
mir-4682	0	0	0	0	0	0	0.188135	0	0	0	0.188135	0	0	0	0	0	0	0	0	0	0	0
mir-4684	0	0	0	0	0	0.433464	0	0	0	0	0.433464	0	0	0	0	0	0	0	0	0	0	0
mir-4685	0	0	0	0	0	0	0	0	0	0	0	0	0	0	0.463116	0	0	0	0	0	0	0.463116
mir-4687	0	0	0	0	1.02525	0	0.37627	0	0	0	1.40152	0	0	0	0	0	1.75296	0.416585	0	0.200128	0	2.36967
mir-4688	0	0	0	0	0	0	0	0	0	0	0	0	0	0	0	0	0	0.208293	0	0	0	0.208293
mir-4689	0	0	0	0	0	0	0.188135	0	0	0	0.188135	0	0	0	0	0	1.75296	0	0	0	0	1.75296
mir-4699	0	0	0	0	0	0	0	0.424607	0	0	0.424607	0	0	0	0	0	0	0	0	0	0	0
mir-4700	0	0	0	0	0	0	0.188135	0	0	0	0.188135	0	0	0	0	0	0	0	0	0	0.19969	0.19969
mir-4701	0	0	0	0	0	0	0	0	0	0	0	0	0	0	0	0	0.292159	0	0	0	0	0.292159
mir-4703	0.518879	0	0	0	0	0	0	0	0	0	0.518879	0	0	0	0	0	0	0	0	0	0	0
mir-4705	0	0	0	0.576792	0	0	0	0	0	0	0.576792	0	0	0	0	0	0	0	0	0	0	0
mir-4706	0	0	0	0	0	0	0.188135	0	0	0	0.188135	0	0	0	2.31558	0	0	0	0	0.200128	0	2.51571
mir-4707	0	0	0	0	0	0.866927	0	0	0	0	0.866927	0	0	0	0	0	1.4608	0	0	0	0	1.4608
mir-4708	0	0	1.95997	0	0	0	0	0	0	0	1.95997	0	0	0	0	0	0	0	0	0	0	0
mir-4709	0.518879	0	0	0	0	0	0	0	0	0	0.518879	0	0	0	0	0	0	0	0	0	0	0
mir-4713	0	0	0	0	0	0	0	0	0	0	0	0	0	0	0	0.448382	0	0	0	0	0	0.448382
mir-4714	0	0	0	0	0	0	0	0	0	0	0	0	0	0	0	0.224191	0	0	0	0	0	0.224191
mir-4723	0	0	0	0	0	0	0	0	0	0.536972	0.536972	0	0	0	0	0.224191	0	0	0	0	0	0.224191
mir-4724	0	0	0	0	0	0	0	0	0.171113	0	0.171113	0	0	0	0	0	0	0.208293	0	0.600385	0	0.808677
mir-4726	0	0	0	0	0	0	0	0	0	0	0	0	0	0	0	0	0	1.04146	0	0.400256	0	1.44172
mir-4728	0	0	0	0.576792	0	0	0	0	0	0	0.576792	1.40079	0.227214	0	0	0.448382	0	0.416585	0	0	0	2.49298
mir-4733	0	0	0	0	0	0	0	0	0	0	0	0	0	0.989732	0	0	0	0.416585	0	0	0	1.40632
mir-4738	0	0	0	0	0	0	0	0	0	0	0	0	0	0	0	0	0	0.208293	0	0	0	0.208293
mir-4742	0.518879	0	1.95997	0.288396	0	1.30039	0	0	0	0	4.06764	0	0	0.494866	0	0	0	0	0	0	0	0.494866
mir-4745	0	0	0	0	0	0	0.37627	0	0	0	0.37627	0	0	0	0	0.224191	0	0.208293	0	0	0	0.432484
mir-4746	0.518879	0.39892	0	0	0	3.90117	0.752541	0	0.171113	0	5.74263	0	0	0	0	0.224191	1.75296	1.66634	0	0	0.39938	4.04287
mir-4748	0	0	0	0	0	0	0	0	0	0	0	0	0	0	0	0	0	0.416585	0	0	0	0.416585
mir-4750	0	0	1.95997	0	0	0.866927	0	0	0	0	2.8269	0	0	0	0	0	0	0	0	0	0	0
mir-4752	0	0	0	0	0	0	0	0	0.513339	0.536972	1.05031	0	0	0	0	0	0	0	0	0	0	0
mir-4753	0	0	0	0	0	0	0.37627	0	0	0	0.37627	0	0	0.989732	0	0	0	0	0	0	0	0.989732
mir-4757	0	0	0	0	0	0.866927	0.188135	0	0	0	1.05506	0	0	0	0	0	0	0	0	0	0	0
mir-4758	0	0	0	0	0	0.866927	0	0	0	0	0.866927	0	0	0	0	0	0	0.208293	0	0	0	0.208293
mir-4762	0	0	0	0	0	0	0	0	0	0	0	0	0	0	0.463116	0	0	0	0	0	0	0.463116
mir-4763	0.518879	0	0	0	0	0	0	0	0	0	0.518879	0	0	0	0	0	0	0	0	0	0	0
mir-4767	0	0	0	0	0	0	0	0	0.342226	0	0.342226	0	0	0	0	0	0	0.208293	0	0	0	0.208293
mir-4772	0.518879	0	0	0	0	0.433464	0	0	0	0	0.952343	0	0	0	0	0	0	0.208293	0	0.200128	0.798759	1.20718
mir-4773-1	0	0	0	0	0	0	0.188135	0	0	1.07394	1.26208	0	0	0	0	0	0	0	0	0	0	0
mir-4773-2	0	0	0	0	0	0.433464	0	0	0	0	0.433464	0	0	0	0	0	0	0	0	0	0	0
mir-4774	0	0	0	0	0	0.866927	0	0	0	0	0.866927	0	0	0	0	0	0	0	0	0	0	0
mir-4775	0	0	0	0	0	0	0	0	0	0	0	0	0.227214	0	1.38935	0	0	0	0	0.200128	0.39938	2.21607
mir-4776-1	0	0.39892	0	0.288396	0	0	0	0	0	0	0.687316	1.40079	0.227214	0	0	0.448382	0	0.208293	0	0	0	2.28468
mir-4776-2	0	0	1.95997	0	0	0	0.37627	0.424607	0	0	2.76085	0	0.227214	0	0	0.224191	0	0	0	0	0	0.451405
mir-4778	0	0	0	0	0	0	0.188135	0	0	0	0.188135	0	0	0	0	0	0	0.208293	0	0	0	0.208293
mir-4779	0.518879	0	0	0	0	0	0	0	0	0	0.518879	0	0	0	0	0	0	0	0	0.200128	0	0.200128
mir-4781	0	0	0	0	0	0.433464	0	0	0	0	0.433464	0	0	0	0	0.224191	0	0	0	0	0	0.224191
mir-4786	0	0	0	0	0	0	0	0	0.171113	0	0.171113	0	0	0	0	0	0	0	0	0	0	0
mir-4787	0	0	0	0	0	0	0	0	0.171113	0	0.171113	0	0	0	0	0	0	0.208293	11.1763	0	0.599069	11.9837
mir-4796	0	0	0	0	0	0	0	0	0	0	0	0	0	0	0	0.224191	0	0	0	0	0	0.224191
mir-4797	0	0	0	0	0	0	0	0	0	0	0	0	0	0	0	0.224191	0	0	0	0	0.39938	0.62357
mir-4798	0	0	0	0	0	0.433464	0	0	0	3.75881	4.19227	0	0	0	0	0	0	0	0	0	0	0
mir-4799	0	0	0	0	0	0	0	0	0.171113	0	0.171113	0	0	0	0	0	0	0	0	0	0	0
mir-4802	0	0	0	0.288396	0	0	0	0	0	1.07394	1.36234	0	0	0	0	0	0	0	0	0	0	0
mir-4804	0	0	0	0	0	0	0	0	0	2.14789	2.14789	0	0	0	0	0	0	0	0	0	0.19969	0.19969
mir-484	8.82095	0.79784	0	6.05631	4.101	44.6468	9.97116	2.12303	6.50229	0	83.0194	4.20238	4.31708	2.47433	7.40986	11.8821	13.1472	21.4541	5.58815	6.4041	3.9938	80.8731
mir-485	0	0	0	0	0	0	0.188135	0	0	0	0.188135	0	0	0	0	0	0	0	0	0	0	0
mir-486-1	5.70767	1.9946	0	1.15358	2.0505	10.4031	7.33727	0.849214	3.9356	0	33.4316	4.20238	2.04493	1.97946	5.55739	4.70801	14.0236	23.9537	11.1763	6.20398	4.99224	78.842
mir-486-2	4.15103	1.59568	0	2.30717	0	11.2701	8.08981	0.849214	4.27783	0	32.5408	2.80159	1.13607	0.989732	5.55739	4.03543	17.2374	24.162	5.58815	6.80436	5.99069	74.3028
mir-491	0	0	0	0	0	0	0	0	0	0	0	0	0	0	0	0.224191	0	0	0	0	0	0.224191
mir-492	0	0	0	0.288396	0	0	0.37627	0	0	0	0.664666	0	0	0	0	0	0	0	0	0.200128	0	0.200128
mir-493	0	0.39892	0	0	0	0	2.44576	0	0	15.5722	18.4169	0	0	0	0	0	0.584318	0	0	0	0	0.584318
mir-494	0	0	0	0	0	0	0.37627	0	0	0	0.37627	0	0	0	0	0	0	0	0	0	0	0
mir-495	0	0	0	0	0	0	0	0	0	0	0	0	0	0	0	0	0	0.208293	0	0	0	0.208293
mir-4999	0	0.39892	0	0	0	0	0.188135	0	0	0.536972	1.12403	0	0	0	0	0.224191	0	0	0	0.600385	0	0.824576
mir-499a	5.70767	2.79244	3.91995	3.46075	5.12625	20.8063	6.20846	0.849214	4.44894	0	53.3199	22.4127	7.49808	6.43325	16.6722	39.6818	23.3727	31.6605	11.1763	15.61	14.3777	188.895
mir-5001	0	0	0	0	0	0.433464	0	0	0.513339	0	0.946803	1.40079	0	0	0	0.224191	0.584318	0.208293	11.1763	0.200128	0	13.794
mir-5003	0	0	0	0	0	0	0	0.424607	0	1.07394	1.49855	0	0	0	0	0	0	0	0	0	0	0
mir-5006	0	0	0	0	0	0	0.188135	0	0	0.536972	0.725108	0	0	0	0	0	0	0	0	0	0	0
mir-5009	0	0	0	0	0	0	0.37627	0	0.171113	4.83275	5.38014	0	0	0	0	0.224191	1.4608	0	0	0.200128	0	1.88512
mir-500a	2.5944	0	0	0.865188	0	3.46771	1.88135	0.849214	1.19779	0	10.8557	1.40079	0.227214	0.494866	0	2.01772	1.16864	1.24976	0	0.600385	1.19814	8.35751
mir-500b	1.03776	0	0	0.288396	0	0	0.564406	0	0	1.61092	3.50148	0	0	0	0	26.0061	0	0	0	0	0	26.0061
mir-501	9.33982	1.59568	3.91995	5.47952	6.15151	18.6389	8.27795	2.54764	4.27783	0	60.2288	23.8135	9.31579	5.44352	6.94674	7.62249	6.71966	13.3307	0	5.80372	3.39473	82.3909
mir-5010	0	0	0	0	0	1.30039	0.188135	0	0	0.536972	2.0255	0	0	0	0	0	0	1.66634	0	0	0	1.66634
mir-502	0	0	0	2.30717	1.02525	3.03425	2.82203	0	1.54002	1.61092	12.3396	8.40476	0.681643	2.96919	5.55739	0	0.584318	4.16585	0	3.60231	2.59597	28.5614
mir-503	0	0	0	1.15358	0	4.33464	0	0	0.171113	1.07394	6.73328	0	0	0	2.31558	0.448382	0	2.70781	0	1.20077	1.19814	7.87068
mir-504	0.518879	0	0	0.576792	0	1.73385	0.752541	0	0.684452	0	4.26652	2.80159	0.454429	0.494866	0.463116	2.01772	0	1.04146	0	0.200128	0.39938	7.87269
mir-505	1.03776	0.39892	0	0	0	5.63503	1.69322	0	1.3689	0	10.1338	4.20238	0.227214	0.494866	0.463116	2.69029	4.38239	2.49951	0	1.00064	1.19814	17.1585
mir-506	0	0	0	0	0	0.433464	0.564406	0	0.171113	0	1.16898	0	0	0	0	1.12095	0.876478	0	0	0	0	1.99743
mir-508	0	1.19676	0	0.288396	0	0.433464	0.37627	0	0	0	2.29489	1.40079	0.227214	0	0	1.79353	0	0.624878	0	0.800513	0.39938	5.24631
mir-5088	0	0	0	0	0	0	0	0	0	0	0	0	0	0	0	0.224191	0	0	0	0	0	0.224191
mir-5089	0	0	0	0.288396	0	0	0.564406	0	0	0	0.852801	0	0	0.494866	0	1.34514	0	0.416585	0	0	1.59752	3.85411
mir-5090	0	0	0	0	0	0	0	0	0.171113	0.536972	0.708085	0	0	0	1.38935	0	0	0.416585	0	0	0.39938	2.20531
mir-5091	0	0	0	0	0	0	0	0	0	2.68486	2.68486	0	0	0	0	0	0	0	0	0.200128	0	0.200128
mir-509-1	0	0	0	0	0	0	0	0	0	0	0	0	0	0	0	0	0.876478	0.208293	0	0.200128	0	1.2849
mir-509-2	0	0	0	0	0	0	0	0	0	5.36972	5.36972	0	0	0	0	0.224191	0.876478	0	0	0	0	1.10067
mir-509-3	3.63215	1.19676	15.6798	0	4.101	1.30039	1.69322	0	0.171113	0	27.7744	2.80159	0.227214	0	0.463116	9.19182	7.8883	0.833171	5.58815	3.20205	1.59752	31.7929
mir-5100	0	0	0	0	0	0	0	0	0	0	0	0	0	0	0.463116	0	0	0	0	0	0.39938	0.862496
mir-511	11.9342	3.9892	1.95997	4.03754	1.02525	19.0724	6.20846	1.27382	15.4002	5.36972	70.2708	15.4087	2.04493	4.45379	6.02051	12.3305	4.38239	10.4146	5.58815	7.20462	2.19659	70.0448
mir-513b	0	0	0	0.288396	0	0	0	0	0	6.44367	6.73207	0	0	0	0	0	0	0	0	0	0	0
mir-513c	0	0	0	0	0	0	0.188135	0	0	5.36972	5.55786	1.40079	0	0	0.463116	0	0	0.208293	0	0.600385	0	2.67259
mir-514a-1	1.03776	1.59568	3.91995	0.288396	3.07575	1.30039	1.50508	0.424607	0.171113	0	13.3187	4.20238	0.227214	0.989732	2.31558	4.48382	0.876478	1.24976	5.58815	3.80244	1.39783	25.1334
mir-514a-2	1.03776	1.59568	3.91995	0.288396	1.02525	1.30039	1.50508	0.424607	0.171113	0	11.2682	4.20238	0.227214	1.4846	2.31558	4.03543	0.876478	1.04146	0	4.00256	1.19814	19.3839
mir-514a-3	1.03776	3.19136	1.95997	0.288396	1.02525	1.73385	1.69322	0.424607	0.171113	0	11.5255	4.20238	0.227214	0.989732	1.85246	4.25963	0.584318	0.833171	0	4.20269	0.998449	18.15
mir-514b	0	0	0	0	1.02525	0	0	0	0	0	1.02525	0	0	0	0	0	0	0	0	0	0	0
mir-516b-1	0	0	0	0	0	0	0.37627	0	0	0	0.37627	0	0	0	0	0	0	0	0	0	0	0
mir-516b-2	0	0	0	0	0	0	0.564406	0	0	0	0.564406	0	0	0.494866	0	0	0	0	0	0	0	0.494866
mir-5187	0	0	0	0	0	0	0	0	0	0	0	0	0	0	0	0	0	0.208293	0	0	0	0.208293
mir-5188	0	0	0	0	0	0	0	0	0	0	0	1.40079	0	0	0	0	0	0	0	0	0	1.40079
mir-5191	0	0	0	0	0	0	0.188135	0	0	0	0.188135	0	0	0	0	0	0	0	0	0	0	0
mir-5193	1.03776	0	0	0	0	0	0.188135	0	0	48.3275	49.5534	0	0	1.4846	0	0	0	0.208293	0	0	0	1.69289
mir-5194	0	0	0	0	0	0	0	0	0	0	0	0	0	0	0	0	0	0	0	0.200128	0	0.200128
mir-5196	0	0	0	0	0	0.866927	0	0	0	0	0.866927	0	0	0	0	0	0	0.416585	0	0	0	0.416585
mir-532	200.287	32.3125	33.3195	40.6638	89.1968	150.412	81.6507	9.34135	65.0229	0.536972	702.744	190.508	19.3132	24.2484	47.2378	116.131	177.048	125.392	61.4697	48.0308	33.7476	843.127
mir-539	0	0	0	0	0	0	0.188135	0	0	0	0.188135	0	0	0	0	0	0	0	0	0	0	0
mir-542	0	0	0	2.88396	0	3.46771	0	0	0	0	6.35167	0	0	0.494866	0	0.448382	0	0.208293	0	1.00064	0.599069	2.75125
mir-543	0	0	0	0	0	0	1.12881	0	0	0	1.12881	0	0	0	0	0.224191	0.584318	0	0	0	0	0.808509
mir-544a	0	0	0	0	0	0	0	0	0	0.536972	0.536972	0	0	0	0	0	0.292159	0	0	0	0	0.292159
mir-544b	1.03776	0	0	0	0	0	0	0	0.684452	0	1.72221	0	0	0	0	0	0	0	0	0	0	0
mir-548a-1	0	0	0	0	0	0.433464	0	0	0.171113	0	0.604577	2.80159	0	0	0	0	0	0	0	0	0	2.80159
mir-548a-2	0	0	0	0	0	0	0	0	0.171113	0	0.171113	1.40079	0	0	0	0	0.292159	0	0	0	0.19969	1.89264
mir-548a-3	0	0	0	0	0	0.433464	0.188135	0	0.171113	0	0.792712	0	0	0	0	0	0	0	0	0	0	0
mir-548aa-1	0	0	0	0	0	0	0	0	0	0	0	0	0	0	0	0	0	0	0	0	0	0
mir-548aa-2	0	0	0	0	0	0	0	0	0	0	0	0	0	0	0	0	0	0	0	0	0.19969	0.19969
mir-548ad	0	0	0	0	0	0	0.188135	0.849214	0	0.536972	1.57432	0	0	0	0	0	0	0	0	1.00064	0.798759	1.7994
mir-548ae-1	0.518879	0	0	0	0	0	0	0	0	0	0.518879	0	0	0	0	0	0	0	0	0	0	0
mir-548ae-2	0	0	0	0	0	0	0	0	0	0.536972	0.536972	0	0	0	0	0	0	0.416585	0	0	0.19969	0.616275
mir-548ah	0	0	1.95997	0	0	0	0	0	0.171113	0	2.13109	0	0	0	0	0.672572	0.584318	0	0	0.200128	0.19969	1.65671
mir-548aj-2	0	0	0	0	0	0.433464	0.564406	0	0.171113	0	1.16898	0	0	0	0	0.224191	0	0.833171	0	0.200128	0	1.25749
mir-548ak	0	0	0	0	0	0	0.188135	0	0	0	0.188135	0	0	0	0	0	0	0	0	0	0	0
mir-548am	0	0	0	0	0	0.433464	0.188135	0	0	0	0.621599	1.40079	0	0	0	0	0	0	0	0	0	1.40079
mir-548ap	0	0	0	0	0	0	0.188135	0	0	0	0.188135	0	0	0	0	0	0	0	0	0.200128	0.39938	0.599508
mir-548ar	0	0	0	0	0	0	0	0	0	1.07394	1.07394	0	0	0	0	0	2.04511	0	0	0	0	2.04511
mir-548au	0	0	0	0	0	0.866927	0	0	0	0	0.866927	0	0	0	0	0	0	0	0	0	0	0
mir-548aw	0	0	0	0	0	0	0.188135	0	0	0	0.188135	0	0	0	0	0	0	0	0	0	0	0
mir-548ax	0	0	0	0	0	0.866927	0	0	0	3.75881	4.62573	0	0	0	0	0	0	0	0	0	0	0
mir-548ay	0	0	0	0.288396	0	2.16732	0	0	0	0	2.45571	0	0	0	0	0.224191	0	0	0	0.200128	0	0.424319
mir-548az	0	0.79784	0	0	3.07575	1.73385	1.31695	0.424607	0.171113	0	7.52011	1.40079	1.13607	0	0	0.896763	0	0.208293	0	0	0	3.64192
mir-548b	0	0	0	0	0	0	0.188135	0	0.342226	0	0.530361	2.80159	0.227214	0.989732	0	1.79353	0	1.66634	0	0.400256	3.19504	11.0737
mir-548c	0	0	0	0	0	0.433464	0	0	0	0	0.433464	0	0	0	0	0	0	0	0	0	0	0
mir-548d-1	0	0	0	0	0	1.73385	0	0	0.171113	0	1.90497	0	0	0	0	0.224191	0	0	0	0.400256	0.19969	0.824137
mir-548d-2	1.03776	0	0	0	0	1.73385	0	0	0.855565	0	3.62718	1.40079	0.227214	0	0	0.224191	0	0	0	0.200128	0.39938	2.45171
mir-548e	0.518879	0	0	0	0	0.433464	1.12881	0	0	0	2.08115	0	0	0	1.85246	0	2.33727	0.833171	0	0.800513	0.39938	6.2228
mir-548f-1	0.518879	0	0	0	0	3.46771	0.37627	0	0.171113	0	4.53397	0	0	0	0	0	0.876478	0.833171	0	0.600385	0.599069	2.9091
mir-548f-2	1.03776	1.19676	0	2.30717	0	0.433464	0.37627	0	0.342226	0	5.69365	0	0	0	0	0.224191	0.876478	0.833171	0	0.600385	0.19969	2.73391
mir-548f-3	0.518879	0.79784	0	0.288396	0	0.866927	0	0.424607	0.171113	1.07394	4.14171	0	0	0	0	0	0.584318	1.04146	0	0.400256	0.39938	2.42542
mir-548f-4	0	0	0	0	0	0	0	0	0	0	0	0	0	0	0	0	0	0	0	0	0	0
mir-548f-5	0	0	0	0	0	0	0	0	0	0	0	0	0	0.494866	0	0	0	0	0	0	0	0.494866
mir-548g	0	0	0	0	0	0.866927	0.188135	0	0.171113	0	1.22618	0	0	0	0	0	0	0.416585	0	0.400256	0.39938	1.21622
mir-548h-1	0	0	0	0	0	0	0	0	0	0	0	0	0	0	0	0	0	0	0	0.200128	0	0.200128
mir-548h-2	0	0	0	0	0	0	0.188135	0	0	0	0.188135	0	0	0	0	0	0	0	0	0	0	0
mir-548h-3	0	0	0	0	0	0.433464	0	0	0	1.61092	2.04438	0	0	0	0	0	0	0.208293	0	0	0	0.208293
mir-548h-5	0	0	0	0	0	0.433464	0	0	0	1.07394	1.50741	0	0	0	0	0	0	0	0	0	0	0
mir-548i-1	1.03776	0	0	0.288396	0	0	0.37627	0	0	0	1.70242	1.40079	0	0	0	0.448382	0.584318	1.04146	0	0.200128	0.19969	3.87478
mir-548i-2	0	0	0	0.576792	0	0	0	0	0	0	0.576792	1.40079	0	0	0	0.448382	0.876478	0.624878	0	0.200128	0.19969	3.75035
mir-548i-3	0	0	0	0.288396	0	0	0.188135	0	0	0	0.476531	0	0.227214	0.494866	0	0.448382	0.584318	0.833171	0	0	0.19969	2.78764
mir-548i-4	0.518879	0	0	0.576792	0	0	0	0	0	1.07394	2.16962	0	0	0	0	0.896763	0.876478	1.04146	0	0.200128	0.19969	3.21452
mir-548j	0	0	0	0	0	0.433464	0.37627	0	0	0.536972	1.34671	0	0	0	0	0	0	0	0	0.200128	0	0.200128
mir-548k	1.55664	0	0	0	0	1.73385	0	0	0.171113	0	3.46161	0	0	0	0	0.896763	0	0	0	0.200128	0.39938	1.49627
mir-548l	0	0.39892	0	0	0	0	0	0	0	0	0.39892	0	0	0	0	0	0	0	0	0	0	0
mir-548n	0	0	1.95997	0	0	0	0	0	0.171113	0	2.13109	0	0	0	0	0	0	0.208293	0	0	0	0.208293
mir-548o	2.5944	2.39352	3.91995	0.576792	2.0505	4.33464	2.44576	0	1.19779	0	19.5133	0	0.454429	0.494866	0	0.672572	3.79807	0.208293	0	0.800513	1.19814	7.62688
mir-548o-2	3.11327	2.39352	1.95997	0.288396	2.0505	4.7681	2.25762	0.424607	1.02668	0	18.2827	2.80159	0.454429	0	0	0.672572	4.38239	0.416585	0	0.800513	1.39783	10.9259
mir-548q	0	0	1.95997	0	0	1.73385	0.188135	0	0	0	3.88196	0	0	0	0	0	0	0.416585	0	0	0.798759	1.21534
mir-548t	0	0.39892	0	0	0	0	0	0.424607	0	0	0.823527	0	0	0	0	0	0	0	0	0	0	0
mir-548u	1.03776	0	0	0	0	1.30039	0.188135	0	0.342226	0	2.86851	0	0.454429	0	0	0.224191	0	0	0	0	0.19969	0.87831
mir-548v	0	0	0	0	0	0	0	0	0	0	0	0	0	0	0	0.224191	0	0	0	0	0	0.224191
mir-548w	0	0	0	0.576792	0	0.433464	0	0	0	0	1.01026	0	0	0	0	0	0	0	0	0	0	0
mir-548x	0	0	0	0	0	0.866927	0.188135	0	0.171113	0	1.22618	0	0	0	0	0	0	0.208293	0	0.200128	0	0.408421
mir-548x-2	0	0	0	0	0	0	0	0	0	0	0	0	0	0	0	0.224191	0	0	0	0	0	0.224191
mir-548y	0	0	0	0	0	0	0	0	0	0	0	0	0	0	0	0	0.292159	0	0	0	0	0.292159
mir-548z	0	0	0	0	0	0	0	0	0	0	0	0	0	0	0	0	0	0	0	0.200128	0	0.200128
mir-549a	0	0	0	0	0	0.433464	0	0	0	0	0.433464	0	0	0	0	0.672572	0	0	0	0	0.39938	1.07195
mir-550a-1	0	0	0	0	0	0	0.37627	0	0	0.536972	0.913243	0	0	0	0	0	0	0	0	0	0	0
mir-550a-2	0	0	0	0	0	0	0	0	0	1.07394	1.07394	0	0	0	0	0	0	0	0	0.200128	0	0.200128
mir-550a-3	0	0	0	0	0	0	0	0	0	0	0	0	0	0	0	0	0	0.208293	0	0	0.19969	0.407982
mir-551b	0	0	0	0	0	0	0.37627	0	0	1.07394	1.45022	0	0	0	0.463116	0	0	0.208293	0	0	0	0.671409
mir-552	0	0	0	0.288396	0	1.30039	0	0	0	0	1.58879	0	0	0	0	0	0	0	0	0.200128	0	0.200128
mir-556	1.03776	0.39892	1.95997	0.288396	1.02525	1.30039	0.752541	0	0.342226	0	7.10546	2.80159	0	0.494866	1.85246	4.03543	0	1.24976	0	0.200128	0	10.6342
mir-5571	1.55664	0	0	0.288396	0	0.866927	0	0	0.171113	0	2.88307	0	0	0.494866	4.63116	0	0.292159	0	0	0	0	5.41819
mir-5580	0	0	0	0	0	0	0	0	0	0	0	0	0	0	0	0	0	0	0	0.200128	1.59752	1.79765
mir-5582	0	0	0	0	1.02525	0	0	0	0	0	1.02525	0	0	0	0	0	0	0	0	0	0	0
mir-5584	0.518879	0	0	0	0	0	0	0	0	0	0.518879	0	0	0	1.38935	0	0	0	0	0	0	1.38935
mir-5585	0	0.79784	0	1.44198	0	0.866927	0.37627	0	0.171113	0.536972	4.1911	0	0.227214	0.494866	0	0.448382	1.4608	0.833171	0	0.200128	0.798759	4.46332
mir-5588	0	0	0	2.01877	4.101	0	0.188135	2.97225	0.171113	0.536972	9.98824	0	0.454429	0	0	0	0	0	0	0.400256	0	0.854685
mir-561	1.55664	0	0	0	0	0.433464	0.37627	0	0	2.14789	4.51426	0	0	0	0	0.896763	0	0.208293	0	0.400256	0	1.50531
mir-5680	0	0	0	0.576792	0	0	0	0	0	0	0.576792	0	0	0	0	0	0	0	0	0	0	0
mir-5684	2.07552	0	0	4.61433	1.02525	3.46771	7.52541	1.69843	8.38454	0	28.7912	1.40079	2.49936	5.93839	0	2.91448	1.16864	1.66634	0	4.80308	5.59131	25.9824
mir-5687	0	0	0	0	0	0	0.188135	0	0	0	0.188135	0	0	0	0	0	0	0	0	0	0	0
mir-5688	0	0	0	0	1.02525	0	0	0	0	0	1.02525	0	0	0	0	0	0	0	0	0	0	0
mir-5689	0	0.79784	0	1.15358	0	0	1.50508	0	0.684452	0	4.14096	1.40079	0	0	0	0.224191	0	0	5.58815	0	0.19969	7.41283
mir-5692c-2	0	0	0	0	0	0	0	0	0	0	0	0	0.227214	0	0	0	0	0	0	0	0	0.227214
mir-5694	0	0	0	0	0	0	0	0.849214	0	0.536972	1.38619	0	0	0	0	0	0	0	0	0	0	0
mir-5695	0	0	0	0	0	0	0	0	0	0	0	0	0	0	0.463116	0.224191	0	0	0	0.200128	0.39938	1.28681
mir-5696	0	0	0	0	0	0	0.188135	0	0	0	0.188135	0	0	0	0.463116	0.672572	0	0.624878	0	0	0	1.76057
mir-5699	0	0	0	0	0	0	0	0	0.171113	0	0.171113	0	0	0	0	0.448382	0	0	0	0	0	0.448382
mir-570	0	0	0	0	0	0	0	0	0	0	0	0	0.227214	0	0	0	0	0	0	0	0	0.227214
mir-5701-1	0.518879	0	0	0	0	0	0.752541	0	0	0	1.27142	0	0	0	0.463116	0	0	0.208293	0	0	0.19969	0.871099
mir-5701-2	0.518879	0.39892	0	0	0	0	0.564406	0	0	0	1.4822	1.40079	0	0	0.463116	0	0	0.416585	0	0	0	2.2805
mir-5701-3	0	0	0	0	0	0	0.752541	0	0	18.794	19.5466	0	0	0	0.463116	0	0	0.416585	0	0	0	0.879701
mir-5708	0.518879	0	0	0.865188	0	0.433464	0	0	0	0	1.81753	0	0	0	0	0.224191	0	0	0	0	0.39938	0.62357
mir-574	0	0	3.91995	0	0	0	0	0	0	0	3.91995	0	0	0	0	0	0	0	0	0	0	0
mir-576	4.66991	0.79784	0	0.576792	2.0505	2.16732	0.188135	0.424607	1.88224	0	12.7574	2.80159	0.227214	0.494866	0.926232	1.12095	1.16864	0.416585	0	3.00192	1.39783	11.5558
mir-577	0	0	0	0	0	0	0	0	0	0	0	0	0	0	0	0	0	0	0	0.400256	0	0.400256
mir-5787	0.518879	0.39892	0	0.576792	0	0	0	0	0.342226	0	1.83682	0	0	0	0.463116	0	0	0	0	0	0.798759	1.26188
mir-579	0	0	0	0	1.02525	0	0	0	0	0	1.02525	0	0	0	0	0.448382	0	1.04146	0	0	0	1.48985
mir-580	0	0	0	0	0	0	0	0	0	8.05459	8.05459	0	0	0	0	0	0	0.208293	0	0	0	0.208293
mir-581	0	0.39892	0	0	0	0	0	0	0.684452	0	1.08337	1.40079	0	0	1.38935	0.224191	0	0.208293	0	0.200128	0.798759	4.22151
mir-582	0	0	19.5997	0	0	0	0	0	0	0	19.5997	0	0	0	0	0	0	0	0	0	0	0
mir-583	0	0	0	0	0	0	0.37627	0	0	0	0.37627	0	0	0	0	0	0	0	0	0	0	0
mir-584	0	0.79784	0	0.288396	0	2.60078	0.188135	0.849214	0	1.61092	6.33529	1.40079	0.227214	0	2.31558	0	1.4608	1.87463	5.58815	1.00064	0.39938	14.2672
mir-589	0	0	1.95997	0	0	0	0	0	0	0	1.95997	0	0	0	0	0	0	0	0	0	0	0
mir-590	1.55664	0	0	0	1.02525	5.20156	0.37627	0	0.171113	0.536972	8.86781	0	0.227214	0.494866	0	0.224191	0	0	0	0	0.39938	1.34565
mir-592	0	0	0	0	0	0	0.37627	0	0	1.61092	1.98719	1.40079	0	0.494866	0	0.896763	0	0.208293	0	0	0.599069	3.59978
mir-597	0	0	0	0	0	0.866927	1.31695	0.424607	0.171113	0.536972	3.31657	0	0	0	0	0.448382	0	0.208293	0	0.400256	0	1.05693
mir-598	1.03776	0	0	0	2.0505	1.30039	0.188135	0	0.684452	0.536972	5.79821	0	0.227214	0	0.463116	5.60477	0.292159	3.54098	5.58815	1.00064	1.39783	18.1149
mir-599	0	0	0	1.15358	0	0.866927	0	0	0	0	2.02051	1.40079	0	0	0	0.224191	0	0	0	0.600385	0	2.22537
mir-607	0	0	0	0.288396	0	0	0	0	0	0	0.288396	0	0	0	0	0	0	0	0	0	0	0
mir-609	0	0	0	0	0	0	0	0	0	1.07394	1.07394	0	0	0	0	0	0	0	0	0	0.19969	0.19969
mir-6125	0	0	0	0	0	0	0	0	0	0	0	0	0	0	0	0.224191	0	0	0	0	0	0.224191
mir-6127	0	0	0	0	0	0.866927	0.752541	0	0.342226	0	1.96169	1.40079	0.227214	0.494866	0	0	0	0	5.58815	0.200128	0.39938	8.31053
mir-6130	0	0	0	0	0	0	0	0	0	0	0	0	0	0	0	0	0	0.416585	0	0	0	0.416585
mir-6131	0	0	0	0	0	0	0.940676	0	0	0	0.940676	0	0.454429	0	0	0	0	0	0	0	0.19969	0.654119
mir-6132	0	0	0	0	2.0505	0	0	0	0	1.07394	3.12445	0	0	0	0	0	0	0	0	0	0	0
mir-616	0.518879	0	0	0	0	0	0.37627	0	0	3.22183	4.11698	0	0	0	0	0.224191	0	0.208293	0	0	0.19969	0.632173
mir-618	0	0	0	0.576792	0	25.1409	0.564406	0	0	0	26.2821	0	0.227214	0	1.38935	0.448382	0	4.37415	0	5.40346	4.79255	16.6351
mir-619	15.0475	1.59568	0	28.8396	20.505	8.66927	15.6152	5.9445	19.8491	0	116.066	9.80556	4.99872	10.887	6.02051	4.48382	4.96671	3.12439	0	4.60295	25.76	74.6497
mir-622	0	0	0	0	0	0	0	0	0	11.2764	11.2764	0	0	0	0	0	0.584318	0	0	0	0	0.584318
mir-624	0	0	0	0	0	0	0	0.424607	0	0.536972	0.961579	0	0	0	0	0.224191	0	0	0	0.200128	0	0.424319
mir-625	10.8965	1.9946	0	6.34471	5.12625	25.1409	5.07965	1.69843	6.50229	11.2764	74.0597	12.6071	1.36329	0.989732	6.94674	4.9322	7.30398	7.91512	5.58815	7.805	1.79721	57.2486
mir-627	0	0	0	0	0	0	0.188135	0	0	5.36972	5.55786	0	0	0	0	0	0	0	0	0.600385	0	0.600385
mir-628	12.4531	1.19676	7.83989	3.74915	20.505	15.6047	16.3678	3.39686	9.92455	0	91.0378	25.2143	8.63415	8.90758	7.87297	18.1595	3.21375	6.24878	22.3526	6.60423	6.58976	113.798
mir-629	13.4909	2.39352	7.83989	7.49829	4.101	43.3464	7.90168	2.12303	3.25115	0	91.9458	12.6071	2.95379	5.93839	4.16804	9.19182	15.1923	11.4561	0	11.0071	6.78945	79.3041
mir-631	0	0	0	0	0	0	0	0	0	0	0	0	0	0	1.38935	0	0	0	0	0	0	1.38935
mir-632	0	0	0	0	0	0	0.564406	0	0.171113	0.536972	1.27249	0	0	0	0	0.224191	0	0.833171	0	0	0	1.05736
mir-636	0	0	0	0	0	0.866927	0	0	0	0.536972	1.4039	0	0	0	0	0	0	0.208293	0	0	0	0.208293
mir-641	0	0	0	0	0	1.30039	0	0	0	10.7394	12.0398	1.40079	0	0	0	0.448382	0	0.416585	0	0.400256	0	2.66602
mir-642a	0	0.39892	1.95997	0.288396	0	0.433464	0	0	0.171113	0	3.25187	4.20238	0.908858	0	3.70493	0.672572	0	0.624878	0	0	0	10.1136
mir-642b	11.9342	3.59028	3.91995	0.865188	0	1.30039	6.58473	0.849214	11.1223	0	40.1663	1.40079	4.08986	0.989732	0	11.6579	17.5296	9.78976	0	1.60103	1.9969	49.0555
mir-643	0	0	0	0	0	0	0.188135	0	0	2.14789	2.33602	0	0.454429	0	0	0.224191	0	0	0	0	0	0.67862
mir-6499	0	0.79784	0	0	0	0	0	0	0	0	0.79784	0	0	0.494866	0	0.448382	0	0.208293	0	0	0	1.15154
mir-6500	0	0.39892	0	0.288396	0	0	0.188135	0	0.684452	0	1.5599	0	0	0.494866	0	0	0	0.624878	0	0	0	1.11974
mir-6501	0	1.19676	0	0	0	0.433464	0	0.424607	0	0	2.05483	0	0	0	1.85246	0.448382	0	1.24976	0	0	0	3.5506
mir-6502	0	0	0	0	0	0.433464	0	0	0	0	0.433464	0	0	0	0	0.448382	0	0	0	0	0	0.448382
mir-6503	0	0.79784	0	0	0	3.03425	0.564406	0	2.22447	2.14789	8.76885	1.40079	0.454429	0	0	2.69029	1.4608	1.45805	16.7645	1.20077	0.39938	25.829
mir-6505	0	0	0	0	0	0	0	0	0	9.12853	9.12853	0	0	0	0	0	0	0	0	0	0.39938	0.39938
mir-651	12.972	0.79784	3.91995	0.288396	1.02525	7.36888	5.45592	1.27382	2.73781	0.536972	36.3768	8.40476	1.13607	2.96919	2.7787	9.19182	2.33727	9.78976	0	2.8018	2.99535	42.4047
mir-6510	31.6516	2.39352	13.7198	1.73038	17.4293	21.2397	77.5117	0.849214	10.0957	0	176.621	22.4127	3.86265	2.47433	10.1886	22.8675	19.8668	10.2063	16.7645	7.40474	5.19193	121.24
mir-6511a-1	0	0	0	0	0	0	0	0	0.171113	0	0.171113	0	0	0	0.463116	0	0.584318	0.416585	0	0	0	1.46402
mir-6511a-2	0	0	0	0	0	0.433464	0	0	0	0	0.433464	0	0	0	0.926232	0.224191	0.876478	0.416585	0	0	0	2.44349
mir-6511a-3	0	0	0	0.288396	0	0	0.188135	0	0.171113	0.536972	1.18462	0	0	0	0.926232	0.224191	0.584318	0.208293	0	0	0	1.94303
mir-6511a-4	0	0	0	0.288396	0	0	0.37627	0	0	0	0.664666	0	0	0	0	0.224191	0.876478	0.208293	0	0	0.19969	1.50865
mir-6511b-1	0	0	0	0.288396	0	0	0.188135	0.424607	0.171113	0	1.07225	0	0	0	0	0	0	0	0	0	0.19969	0.19969
mir-6511b-2	0	0	0	0.576792	0	0	0	0	0	0	0.576792	0	0	0.989732	0	0	0	0	0	0	0	0.989732
mir-6514	0	0	0	0	0	0.433464	0	0	0	0.536972	0.970436	0	0	0	0.463116	0	0	0.624878	0	0	0	1.08799
mir-6515	1.03776	0	0	0	0	1.73385	0.37627	0	0.513339	8.59156	12.2528	1.40079	0.681643	0	0	0	0.584318	0.208293	0	0.600385	0.39938	3.87481
mir-6516	0.518879	0	0	0	0	0.433464	2.82203	0	0.342226	0.536972	4.65357	1.40079	0	0	1.85246	1.34514	1.16864	1.04146	0	0.600385	0.39938	7.80827
mir-652	2.07552	0	1.95997	6.05631	2.0505	23.8405	11.1	0	2.05336	0	49.1361	2.80159	2.04493	2.47433	6.48362	10.0886	1.75296	12.2893	5.58815	4.80308	5.39162	53.7181
mir-653	0.518879	0	0	0	0	0	0	0	0	1.61092	2.1298	0	0	0	0	0.224191	0	0.416585	0	0	0	0.640776
mir-654	0	0	0	0	0	0	0.940676	0	0	4.83275	5.77343	0	0	0	0	0	0	0	0	0	0	0
mir-659	2.07552	0.39892	0	0.865188	0	3.46771	0.752541	0	1.3689	0	8.92878	1.40079	0.908858	0	2.31558	2.4661	1.4608	1.04146	0	0.200128	0.798759	10.5925
mir-660	7.78319	2.39352	0	0.576792	2.0505	5.20156	5.45592	0.424607	1.19779	0	25.0839	5.60317	0.908858	0	3.24181	9.8644	1.4608	5.20732	0	1.60103	1.9969	29.8843
mir-662	0	0	0	0	0	0	0	0	0	0	0	0	0	0	0	0	0.292159	0.208293	0	0	0	0.500452
mir-663a	0	0	0	0	0	0.433464	0.188135	0	0	0	0.621599	0	0	0	0	0	0	1.66634	0	0	0	1.66634
mir-663b	0	0	0	0	0	0.433464	0.37627	0	0	0	0.809734	0	0.227214	0	0	1.12095	0	0	0	0	0.39938	1.74755
mir-664a	0.518879	0	0	0.288396	0	0	0.752541	0	0.513339	5.9067	7.97985	2.80159	0.454429	0	0.463116	0.448382	0.292159	2.08293	0	0.400256	0.19969	7.14255
mir-664b	1.03776	0.79784	0	0	1.02525	0.433464	0.752541	0	0	0	4.04685	2.80159	0	0	1.85246	0	0	0.208293	0	0	0	4.86234
mir-671	4.66991	1.59568	29.3996	4.03754	3.07575	7.36888	12.7932	1.27382	4.62005	0	68.8344	5.60317	1.5905	1.97946	2.31558	3.81124	9.93341	4.37415	0	1.80115	3.59442	35.0031
mir-6715b	0	0	0	0.288396	0	0	0	0	0	0	0.288396	0	0	0	0	0	0	0	0	0	0	0
mir-6716	0	0	0	0	0	0	0.188135	0	0	0	0.188135	0	0	0	0	0	0	0	0	0	0	0
mir-6718	0	0	0	0	0	0	0	0	0	0	0	0	0	0	0	0	0	0	0	0.200128	0	0.200128
mir-6721	0	0	0	0	0	0.433464	0	0	0	0	0.433464	0	0	0	0	0	0	0	0	0	0	0
mir-6724-1	0	0	0	0	0	0	0.188135	0	0	0	0.188135	0	0	0	0	0	0	0	0	0	0	0
mir-6724-4	0	0	0	0	0	0	0.188135	0	0	0	0.188135	0	0	0	0	0	0	0	0	0	0	0
mir-6726	0	0	0	0	0	0	0.188135	0	0	0	0.188135	0	0	0	0	0	0	0	0	0	0	0
mir-6727	0	0	0	0	0	0	0	0	0	0	0	0	0	0	0	0	0.876478	0	0	0	0	0.876478
mir-6729	0	0	0	0	0	0	0	0	0	0	0	0	0	0	1.85246	0	0	0.208293	0	0	0	2.06076
mir-6733	0	0	0	0	0	0	0	0	0	0	0	0	0.454429	0	0	0	0	0.416585	0	0	0	0.871014
mir-6734	0	0	0	0	0	0	0.188135	0	0	0	0.188135	0	0	0	0	0	0	0	0	0	0	0
mir-6735	0.518879	0	0	0	0	0	0.564406	0.424607	0	0	1.50789	1.40079	0	0	0	0	0.584318	0	0	0	0	1.98511
mir-6736	0	0	0	0	1.02525	0.433464	0.940676	0	0	0	2.39939	1.40079	0	1.4846	0	0	0.584318	0.416585	5.58815	0	0	9.47445
mir-6741	0	0	0	0	0	0	0.188135	0	0	0	0.188135	0	0	0	0	0	0	0	0	0	0	0
mir-6743	0.518879	0	0	0	0	0	0	0	0	1.07394	1.59282	0	0	0	0.463116	0	0	0	0	0	0	0.463116
mir-6744	0	0.39892	0	0	0	0	0.37627	0	0	0	0.775191	0	0	0	1.38935	0.224191	0	2.29122	0	1.00064	0	4.9054
mir-6747	3.11327	0	1.95997	0.576792	0	0	0.940676	0	0	0	6.59072	0	0	0	0	0.672572	2.62943	1.87463	0	0	0	5.17664
mir-6748	0	0	0	0	0	0	0	0	0	0	0	0	0	0	0	0	0	0.416585	0	0	0	0.416585
mir-675	0	0	3.91995	0	0	0	0	0	0	0	3.91995	0	0	0	0	0	0	0	0	0	0	0
mir-6750	0	0	0	0	0	0	0	0	0	0	0	0	0	0	0	0	0	0	0	0	0.19969	0.19969
mir-6751	0	0	0	0	0	0	0	0	0	0	0	0	0	0	0	0.224191	0	0	0	0	0	0.224191
mir-6752	0	0	0	0	0	0	0.188135	0	0	0	0.188135	0	0	0	0	0	0	0	0	0	0	0
mir-6753	0	0	0	0	0	0	0	0	0	0	0	0	0	0	0	0	0	0	0	0.200128	0	0.200128
mir-6754	0	0	0	0	0	0.433464	0	0	0	0	0.433464	0	0	0	0	0	0	0	0	0	0	0
mir-6755	0	0	3.91995	0	0	0	0	0	0	1.07394	4.99389	0	0	0	0	0	0	0	0	0	0	0
mir-6758	0	0	0	0	0	0.866927	0	0	0	0	0.866927	0	0	0	0	0	0	0	0	0	0	0
mir-676	1.55664	0	1.95997	0	0	0.433464	1.69322	0	0.684452	0	6.32774	4.20238	0.454429	1.97946	3.24181	2.01772	0	0	0	0.200128	0.599069	12.695
mir-6761	0	0	0	0	0	0	0	0	0.342226	0	0.342226	0	0	0	0	0	0	0	0	0	0	0
mir-6762	0	0	0	0	0	0	0	0	0	0	0	0	0	0	0	0	0	0	0	0	0.19969	0.19969
mir-6763	0	0	0	0	0	0	0	0	0	0	0	1.40079	0	0	0	0	0	0	0	0	0	1.40079
mir-6764	0	0	0	0	0	0.433464	0	0	0.171113	0	0.604577	0	0	0	0	0.448382	0	0	0	0.200128	0	0.64851
mir-6765	0	0	0	0	0	0	0	0	0.171113	0	0.171113	0	0	0	0	0	0	0	0	0	0	0
mir-6766	0	0	0	0	0	0	0	0	0	0	0	0	0	0	0	0.224191	0	0	0	0	0	0.224191
mir-6770-1	0	0	0	0	0	0	0	0	0	0	0	0	0	0.494866	0	0	0	0.416585	0	0	0	0.911451
mir-6770-2	0	0	0	0	0	0	0	0	0	0	0	0	0	0	0	0	0	0.416585	0	0	0	0.416585
mir-6770-3	0	0	0	0	0	0	0	0	0	0	0	0	0	0.494866	0	0.224191	0	0.208293	0	0	0	0.927349
mir-6773	0	0	0	0	0	0	0	0	0	0	0	0	0.227214	0	0	0	0.876478	0	0	0	0	1.10369
mir-6774	0	0	0	0	0	0	0	0	0.171113	0	0.171113	0	0	0	0	0	0	0	0	0	0	0
mir-6777	0.518879	0	0	0	0	0.866927	0	0	0	0	1.38581	0	0	0	0	0	0	0	0	0	0.39938	0.39938
mir-6779	0	0	0	0	0	0	0	0	0	0.536972	0.536972	0	0	0	0	0	0	0.208293	0	0	0.19969	0.407982
mir-6780a	0	0	0	0	0	0	0.188135	0	0	0	0.188135	0	0	0	0	0	0	0	0	0	0	0
mir-6786	0	0	0	0.865188	0	0	0.188135	0	0	0	1.05332	0	0	0	0	0	0.292159	0	0	0	0	0.292159
mir-6787	0	0	0	0	0	0.433464	0.188135	0	0	0	0.621599	0	0.227214	0	0	0	0.584318	0.624878	0	0.200128	0	1.63654
mir-6789	0	0	0	0	0	0.433464	0	0	0	0	0.433464	0	0	0	0	0	0	0	0	0	0	0
mir-6793	0	0	0	0	0	0.433464	0	0	0.513339	0.536972	1.48378	0	0	0	0	0	0.292159	0.208293	0	0	0.39938	0.899831
mir-6795	0	0	0	0	0	0	0.37627	0	0	0	0.37627	0	0	0	0	0	0	0	0	0	0	0
mir-6799	0	0	0	0	0	0	0	0	0	0	0	0	0	0	0	0	0.876478	0	0	0	0	0.876478
mir-6803	0	0	0	0	0	0	0	0	0	0	0	0	0	0	0	0	0	0.208293	0	0	0	0.208293
mir-6805	0	0	0	0	0	0.433464	0.188135	0	0	0	0.621599	0	0	0	0	0.672572	0	0.624878	0	0.200128	0.599069	2.09665
mir-6806	0	0	0	0	0	0.433464	0.188135	0	0	0	0.621599	0	0	0	0	0	0	0.208293	0	0	0	0.208293
mir-6807	0	0	0	0	0	0	0	0	0	0.536972	0.536972	0	0	0	0	0.448382	0	0.208293	0	0	0	0.656674
mir-6808	1.03776	0	0	0	0	0.866927	0.752541	0	0.342226	0	2.99945	0	0.227214	0	0	0.672572	0	0	0	0	0	0.899787
mir-6811	0	0	0	0.288396	1.02525	0	0.188135	0	0	0	1.50178	1.40079	0	0	0	0	0	0	0	0	0	1.40079
mir-6812	0	0	0	0	0	0	0.188135	0	0.171113	0	0.359248	0	0	0	0	0	1.4608	0	0	0	0	1.4608
mir-6813	0	0	0	0	0	0.433464	0	0	0	0	0.433464	0	0	0	0	0	0	0	0	0	0	0
mir-6814	0	0	0	0.288396	0	0	0	0	0.171113	0	0.459509	0	0.227214	0	0	0	0	0.208293	0	0	0	0.435507
mir-6815	0	0	0	0	0	0	0.188135	0	0	0	0.188135	0	0	0	0	0	0	0	0	0	0	0
mir-6817	0	0	0	0	0	0	0	0	0.171113	0	0.171113	0	0	0	0	0	0	0	0	0	0	0
mir-6818	0	0	0	0	0	0.433464	0	0	0	0	0.433464	0	0	0	0	0.448382	0	0.833171	5.58815	0	0.19969	7.0694
mir-6819	0	0	0	0	0	0	0	0	0	0	0	0	0	0	0	0.448382	0	0	0	0.200128	0	0.64851
mir-6821	0	0	0	0	0	1.73385	1.12881	0	0	0	2.86267	0	0	0.494866	0	0	0	0.208293	0	0	0	0.703158
mir-6822	0	0	0	0	0	0	0	0	0	0	0	0	0	0	0	0.448382	0	0	0	0	0	0.448382
mir-6827	2.07552	0	0	0.288396	0	0	0	0	0	0	2.36391	0	0	0	0	0	0	0.208293	0	0	0	0.208293
mir-6833	0.518879	0	0	0	0	0	0	0	0	1.61092	2.1298	0	0	0	0	0	0	0	0	0	0	0
mir-6837	0.518879	0.79784	0	0	0	0.866927	0.188135	0	0	0	2.37178	0	0	0	0	0	0	0	0	0	0	0
mir-6839	0.518879	0	0	0	0	0	0	0	0	4.29578	4.81466	0	0	0	0	0	0	0	0	0	0	0
mir-6842	8.30207	2.79244	1.95997	3.46075	1.02525	18.6389	7.14914	0.849214	3.42226	1.07394	48.674	5.60317	0.908858	1.4846	7.40986	1.34514	13.7315	4.37415	0	3.60231	3.9938	42.4534
mir-6843	2.5944	0.39892	5.87992	0	0	0.866927	2.25762	0.424607	1.3689	0	13.7913	1.40079	0	0	0	0.448382	4.09023	0.833171	0	0.200128	0.599069	7.57177
mir-6846	0	0	0	0	0	0	0	0.424607	0	0	0.424607	0	0	0	0	0	0	0	0	0	0	0
mir-6851	0	0	0	0	0	0	0.752541	0	0	0	0.752541	0	0	0	0	0	0	0.624878	0	0	0	0.624878
mir-6853	0	0	0	0	0	0	0	0	0	0.536972	0.536972	1.40079	0	0	0	0	0	0	0	0	0	1.40079
mir-6854	0	0	0	0	0	0.433464	0.564406	0	0	0	0.997869	0	0	0	0	0	0	0	0	0	0	0
mir-6855	0	0	0	0	0	0	0	0	0.171113	0.536972	0.708085	0	0.454429	0.494866	0	0.224191	0	0.833171	0	0	0	2.00666
mir-6859-1	0	0	0	0	0	0	0	0	0	0	0	0	0	0	0	0	0	0	0	0.200128	0	0.200128
mir-6859-2	0	0	0	0	0	0	0	0	0	0	0	0	0	0	0	0	0	0	0	0	0	0
mir-6859-3	0	0	0	0	0	0	0	0	0	0	0	0	0	0	0	0	0	0	0	0.200128	0	0.200128
mir-6859-4	0	0	0	0	0	0	0.188135	0	0	0	0.188135	0	0	0	0	0	0	0	0	0	0	0
mir-6861	0	0	0	0.288396	0	0	0	0	0.171113	0	0.459509	0	0	0	0	0	0	0	0	0	0	0
mir-6866	1.03776	0	0	1.15358	0	0	1.31695	0.424607	0	0	3.9329	0	0	0	0	0	1.4608	0	5.58815	0.200128	0.599069	7.84815
mir-6868	0	0	0	0	1.02525	0.866927	0.37627	0	0.171113	1.07394	3.51351	4.20238	0	0	0.926232	2.4661	0	1.24976	0	0	0.798759	9.64323
mir-6873	0.518879	0	0	0	0	0	0.564406	0	0.171113	0.536972	1.79137	0	0	0	0	0	0	0.208293	0	0	0.19969	0.407982
mir-6874	0	0	0	0	0	0	0	0	0	0	0	0	0	0	0	0	0	0.208293	0	0	0	0.208293
mir-6875	0	0	0	0	0	0.866927	0.564406	0.424607	0	0	1.85594	0	0	0	0	0	0	0.416585	0	0	0	0.416585
mir-6876	0	0	0	0	0	0	0	0	0	0	0	2.80159	0	0	0	0	0.876478	0	0	0	0	3.67807
mir-6877	0	0	0	0.288396	0	0	0.37627	0	0	0	0.664666	0	0.681643	0	0	0	0.292159	0.624878	0	0	0.19969	1.79837
mir-6878	0	0	0	0	0	0	0	0	0	0	0	0	0	0	0	0	0	0.208293	0	0	0	0.208293
mir-6879	0	0	0	0	0	0	0	0.424607	0	0	0.424607	0	0	0	0	0	0	0	0	0	0	0
mir-6882	0	0.39892	0	0	0	0	0.188135	0	0	0	0.587055	0	0	0	0	0	0	0	0	0	0	0
mir-6885	0	0	0	0	0	0	0.188135	0	0	0.536972	0.725108	0	0	0	0	0	0	0	0	0	0	0
mir-6886	0	0	0	0	0	0.866927	0	0	0	0	0.866927	0	0	0	0	0	0	0	0	0	0	0
mir-6887	0	0	0	0	0	0	0	0	0	0	0	0	0	0	0	0	1.16864	0.624878	0	0	0	1.79352
mir-6889	0	0	0	0	0	0	0	0	0	0	0	0	0	0	0	0	0	0.208293	0	0	0	0.208293
mir-6891	0	0	0	0	0	0.433464	0	0	0.171113	0	0.604577	0	0	0	0	0	0	0	0	0	0	0
mir-6892	0	0	0	0	0	0	0	0.424607	0	0	0.424607	0	0	0	0	0	0	0	0	0	0	0
mir-6894	0	0	0	0	0	0	0	0	0	0	0	1.40079	0	0	0	0	0	0.208293	0	0	0	1.60909
mir-708	28.5384	9.97301	23.5197	5.19113	20.505	33.8102	20.5067	5.09528	11.2935	0	158.433	23.8135	5.68036	4.94866	9.26232	29.8174	49.0828	27.2863	50.2934	8.20526	11.1826	219.573
mir-7-1	15.0475	14.76	3.91995	6.9215	7.17676	71.5215	15.8034	0.424607	3.59337	17.7201	156.889	32.2183	6.81643	8.41272	29.6394	12.7789	8.18046	29.9942	5.58815	43.4278	31.1516	208.208
mir-7108	0	0	0	0	0	0	0.188135	0	0	8.59156	8.77969	0	0	0	0	0	0	0	0	0	0.39938	0.39938
mir-7109	0	0	0	0	0	0.866927	0	0	0	0	0.866927	0	0	0	0	0	0	0	0	0	0	0
mir-7110	0	0	0	0.576792	2.0505	0	4.32711	0.849214	0.513339	0	8.31696	0	2.49936	0	0	0.896763	1.16864	1.45805	0	0.200128	1.19814	7.42108
mir-7111	0	0	0	0	0	0	0.37627	0	0	0	0.37627	0	0	0	0	0	0	0	0	0	0	0
mir-7155	0	0	0	0.288396	0	0	0	0	0	0	0.288396	1.40079	0	0.989732	0	0.224191	0.584318	0	0	0.200128	0	3.39916
mir-7-2	14.5286	15.9568	7.83989	5.76792	3.07575	75.8562	14.8627	0.849214	3.59337	0	142.33	29.4167	6.81643	9.40245	31.0288	12.3305	7.8883	29.5776	11.1763	45.6292	29.5541	212.82
mir-7-3	14.5286	15.159	3.91995	6.63311	3.07575	73.2554	15.2389	0.424607	3.25115	8.05459	143.541	29.4167	7.27086	8.90758	29.1763	12.5547	8.47262	28.9527	11.1763	44.0282	30.3528	210.309
mir-744	117.267	32.7115	9.79987	17.3038	69.7171	82.7916	262.825	20.3811	63.4829	8.59156	684.871	154.087	17.4955	18.8049	39.3649	43.0446	209.77	41.0337	33.5289	9.60616	14.777	581.513
mir-760	1.55664	0.39892	0	0	1.02525	4.7681	4.70338	0	1.3689	71.9543	85.7755	1.40079	4.31708	0.989732	9.26232	6.05315	28.0473	16.8717	0	4.80308	2.19659	73.9417
mir-764	0	0	0	2.30717	0	0	0	0	0	1.07394	3.38111	0	0	0	0	0	0	0	0	0	0	0
mir-766	0	0	0	0.288396	0	3.03425	0.188135	0	1.3689	0	4.87968	2.80159	0	0.989732	0.926232	0.672572	0	2.49951	5.58815	1.00064	0	14.4784
mir-769	21.7929	7.18056	9.79987	9.22867	13.3283	31.6429	21.8237	3.39686	11.6357	0	129.829	51.8294	5.22593	5.44352	7.40986	17.9353	28.6316	24.7868	5.58815	7.20462	9.58511	163.64
mir-7703	0.518879	0	0	0	0	0.433464	0	0	0	13.4243	14.3767	0	0	0	0	0	0	0	0	0	0	0
mir-7704	0	0.39892	0	2.30717	3.07575	0.433464	2.63389	0	1.54002	0	10.3892	0	1.5905	1.97946	3.24181	0	6.71966	1.24976	0	1.00064	1.19814	16.98
mir-7705	0	0	0	0	0	0.433464	0	0	0.684452	0.536972	1.65489	0	0.227214	0	0	1.56934	76.2536	1.45805	0	0	0.39938	79.9075
mir-7706	9.33982	17.9514	3.91995	4.90273	2.0505	18.2055	13.5457	2.54764	15.4002	0	87.8634	7.00397	10.9063	0	9.26232	9.19182	0	19.1629	5.58815	3.80244	5.791	70.7089
mir-7845	0	0	0	0	0	0	0	0	0	12.8873	12.8873	0	0	0	0	0	0	0.208293	5.58815	0	0	5.79645
mir-7846	0	0	0	0	0	0	0.188135	0	0	0	0.188135	0	0	0	0	0	0	0	0	0	0	0
mir-7847	0	0	0	0	0	0	0	0	0.171113	0	0.171113	0	0	0	0	0	0	0	0	0	0	0
mir-7850	0	0	0	0	0	0.866927	0	0	0	0	0.866927	0	0	0	0	0	0	0.208293	0	0.200128	0.19969	0.608111
mir-7851	17.123	2.39352	0	7.2099	12.303	2.16732	11.8525	2.12303	13.689	0	68.8614	5.60317	4.7715	7.42299	2.7787	4.03543	2.92159	0.624878	5.58815	5.60359	11.1826	50.5326
mir-7854	0	0	0	0.576792	0	0	0.564406	0	0.171113	0	1.31231	0	0.454429	0	0	0.448382	0	0.416585	0	1.20077	0.19969	2.71986
mir-7856	0	0	0	0.288396	0	0	0	0	0	0	0.288396	0	0.227214	0	0	0	0	0	0	0	0	0.227214
mir-7974	0	0	0	0	0	0	0.188135	0	0	0	0.188135	0	0	0	0	0	0	0	0	0.200128	0	0.200128
mir-7976	0	0	0	0	0	1.30039	0	0	0	0	1.30039	0	0	0	0	0	0.584318	0	0	0	0	0.584318
mir-8064	0	0	0	0	0	0.433464	0	0	0	0	0.433464	0	0	0	0	0	0	0.208293	0	0	0	0.208293
mir-8072	305.101	9.97301	1.95997	274.264	308.601	0	0	31.8455	477.063	0	1408.81	53.2302	27.9474	183.595	20.3771	48.8736	0	0	0	0	190.304	524.328
mir-8081	0	0	0	0	0	0	0	0.424607	0	0	0.424607	0	0	0	0	0	0	0	0	0	0	0
mir-8086	23.8684	2.79244	3.91995	33.4539	21.5303	16.4716	34.2406	11.4644	37.6449	0	185.386	23.8135	8.63415	22.269	5.55739	9.19182	14.0236	7.70683	11.1763	16.0103	34.746	153.129
mir-8485	0.518879	0.39892	0	0	0	0.433464	0.752541	0.424607	0	8.59156	11.12	0	0	0	0	0.448382	0.584318	0.624878	0	0.400256	0.19969	2.25752
mir-873	2.07552	0	1.95997	0	0	3.03425	0.37627	0.849214	0.171113	0	8.46633	7.00397	0.227214	0	0.463116	0.224191	0	1.04146	0	0.200128	0.798759	9.95884
mir-874	7.26431	1.9946	3.91995	0	2.0505	0.866927	12.6051	1.27382	2.39558	0	32.3707	8.40476	0.681643	0.989732	2.7787	5.82896	2.33727	3.95756	11.1763	0.200128	1.9969	38.352
mir-876	0	0	0	0	0	0	0	0	0	4.29578	4.29578	0	0	0	0	0	0	0.208293	0	0	0	0.208293
mir-877	0	0.39892	3.91995	0	0	1.30039	0.940676	0	1.02668	0	7.58661	2.80159	0	0.989732	0	2.24191	6.71966	1.24976	0	0.400256	0	14.4029
mir-887	0	0	1.95997	0	0	0	0	0	0	1.61092	3.57089	7.00397	0	0	0.926232	0	0	0.208293	0	0.200128	0.39938	8.738
mir-9-1	22.8307	3.59028	5.87992	3.17235	18.4545	27.7417	43.8355	2.12303	10.0957	0	137.724	43.4246	14.0873	8.41272	8.33609	38.1124	11.3942	26.0366	11.1763	16.8108	18.5711	196.362
mir-9-2	22.8307	3.59028	3.91995	3.17235	18.4545	26.8748	43.6474	2.54764	9.58233	11.2764	145.896	43.4246	13.4057	5.93839	8.7992	37.6641	10.8099	26.8698	22.3526	17.4112	17.373	204.048
mir-92a-1	66.9354	41.4877	27.4396	46.1433	57.4141	191.591	96.7015	12.3136	37.1315	10.7394	587.897	86.8492	19.7677	25.2382	54.6477	59.1864	131.179	108.521	55.8815	35.2226	24.3622	600.855
mir-92a-2	58.6333	34.3071	37.2395	43.5478	52.2878	172.952	83.9083	14.012	29.9448	38.662	565.495	81.246	15.6778	19.2998	43.5329	52.6848	112.773	101.439	39.1171	31.0199	19.969	516.759
mir-92b	309.252	90.9538	111.718	232.447	256.313	268.314	393.203	156.255	315.532	28.9965	2162.98	820.865	228.805	103.922	274.165	410.493	754.355	374.927	145.292	66.0423	105.237	3284.1
mir-93	0.518879	0	0	0	0	0.433464	0.564406	0	0.342226	470.925	472.784	5.60317	0.227214	0	0	0.224191	0	0.208293	0	0.400256	0.798759	7.46189
mir-9-3	21.7929	3.19136	3.91995	3.17235	17.4293	26.8748	42.7067	2.54764	10.609	0	132.244	40.623	12.4968	6.92812	9.26232	38.785	11.6864	26.8698	16.7645	17.4112	19.3699	200.197
mir-933	0	0	0	0	0	0.866927	0	0	0	9.12853	9.99546	0	0	0	0	0	0	0	0	0	0	0
mir-934	0	1.19676	3.91995	0.288396	0	3.90117	1.50508	0	0.684452	0	11.4958	7.00397	0	0	0	4.70801	0.876478	1.04146	11.1763	1.4009	2.19659	28.4037
mir-935	0.518879	0	0	0	0	0	0	0	0	1.61092	2.1298	0	0	0	0	0.224191	0	0.208293	0	0	0	0.432484
mir-937	0	0	0	0	0	0	0.940676	0.424607	0	0	1.36528	0	0	0.494866	0	0	0.584318	0.208293	0	0.200128	0	1.48761
mir-939	0	0.39892	0	0	0	0	0	0	0	0	0.39892	0	0	0	0.463116	0	0	0	0	0.200128	0	0.663244
mir-940	0	0	0	0.576792	0	0	0	0	0	0	0.576792	0	0	0	0	0	0	0	0	0	0	0
mir-941-1	6.22655	8.37732	1.95997	6.34471	2.0505	33.8102	6.77287	1.27382	4.10671	0	70.9226	14.0079	2.49936	0.989732	3.70493	6.50153	7.8883	7.91512	5.58815	7.40474	3.59442	60.0942
mir-941-2	6.22655	7.18056	3.91995	5.47952	1.02525	33.8102	8.46608	0.849214	3.9356	2.14789	73.0408	0	2.72657	0.989732	4.16804	6.27734	7.59614	7.29025	5.58815	6.80436	2.79566	44.2362
mir-941-3	6.74543	8.37732	1.95997	6.34471	3.07575	34.6771	6.3966	0.849214	3.76449	1.07394	73.2645	0	2.72657	0.989732	3.24181	6.72572	7.30398	7.29025	5.58815	6.20398	3.79411	43.8643
mir-941-4	6.22655	6.78164	0	5.47952	4.101	34.6771	7.90168	0.849214	4.62005	4.29578	74.9325	0	2.49936	0.989732	2.7787	7.3983	6.71966	7.49854	0	7.00449	2.99535	37.8841
mir-941-5	5.18879	6.38272	0	5.76792	2.0505	35.544	6.02033	1.27382	3.76449	2.14789	68.1405	0	2.49936	1.97946	4.16804	6.27734	7.8883	7.49854	11.1763	7.00449	2.99535	51.4872
mir-942	1.03776	0.39892	0	0.288396	0	6.06849	0.940676	0	0.171113	2.14789	11.0532	0	0	0.989732	3.70493	2.01772	1.4608	2.49951	0	1.20077	0	11.8735
mir-943	0	0	0	0	0	0.433464	0	0	21.5602	0	21.9937	0	0	0	0	0	0	0	0	0	0	0
mir-944	2.07552	0.79784	0	0.576792	0	2.16732	0.940676	0	5.64673	0	12.2049	0	0.454429	0	0	0.672572	2.33727	0.416585	0	0.200128	0.39938	4.48037
mir-95	39.4348	29.919	23.5197	5.19113	24.606	35.9775	18.4372	0.849214	15.5713	0	193.506	0	5.68036	8.90758	3.24181	15.0208	50.2514	11.8727	5.58815	6.60423	10.1842	117.351
mir-96	10.3776	8.37732	0	5.47952	17.4293	26.8748	33.4881	0	0.342226	11.8134	114.182	0	4.54429	1.4846	2.31558	17.4869	4.38239	8.95659	16.7645	4.60295	10.3839	70.9216
mir-98	35.8027	11.1698	3.91995	12.6894	36.909	80.1908	49.4796	3.39686	0	8.59156	242.15	0	12.2696	13.8562	20.8402	58.0654	14.9001	24.5785	27.9408	24.4156	30.1532	227.02
mir-9901	0	0	0	0	0	0	0	0	0	34.9032	34.9032	0	0	0	0.926232	0	0	0	0	0	0	0.926232
mir-9902-1	1.03776	0	0	0.288396	0	0	0.37627	0	0	0	1.70242	0	0.227214	0.494866	0	0.224191	0.584318	0	0	1.00064	0	2.53123
mir-9902-2	0.518879	0	0	0	0	0	0.564406	0	0.342226	0.536972	1.96248	0	0	0.494866	0	0.224191	0.292159	0	0	0.600385	0	1.6116
mir-9903	2.5944	0	1.95997	0	0	0.866927	0.752541	0	0	0.536972	6.71081	0	0.227214	0	0	0.672572	0.876478	0	5.58815	0.200128	0.19969	7.76424
mir-9985	5427.99	0	0	0	2.0505	3.03425	5.64406	1.69843	4.62005	2.14789	5447.19	0	1.36329	2.47433	1.38935	3.58705	3.50591	2.49951	0	0.400256	0.998449	16.2181
mir-99a	213.778	768.32	1528.78	0	2504.69	3473.35	5781.58	1124.36	2626.07	2.68486	18023.6	0	1294.44	1391.07	3519.22	7587.07	4904.77	4844.26	2291.14	1559.4	2781.68	30173
mir-99b	0	64.6251	52.9193	0	133.283	214.565	245.328	43.3099	99.0744	6138.13	6991.24	0	68.1643	59.8788	215.349	156.261	213.568	233.08	122.939	69.6446	96.2505	1235.14
