# Supplementary material for: Conserved MicroRNAs in Human Nasopharynx Tissue Samples from Swabs Are Differentially Expressed in Response to SARS-CoV-2
Source: Genes (Basel). 2022 Feb 14;13(2):348. doi: 10.3390/genes13020348 (PMC8871708; doi:10.3390/genes13020348)
Supplement: Supplementary file 1 [file genes-13-00348-s001.zip › Supplementary Table S4.xlsx]

## Sheet: List1
miRNA/samle	1A	2A	3A	5A	6A	9A	10A	11A	13A	15A	median NegS	average NegS	F11	F7	D11	G9	B1	F5	A7	D3	H3	H5	median PosS	average PosS
mir-148a	38423.5	18540.6	26820.3	5309.37	24445.1	31791.5	30006.6	3372.65	20236.9	13418.9	22341	4710.64	31359.6	3209.18	3563.03	3926.3	13036.9	53305.3	6668.49	9466.33	5389.05	7798.08	7233.29	13772.2
mir-21	6153.91	2391.93	1662.06	3109.2	7005.54	16326	5330.62	1171.07	3952.88	3.22183	3531.04	21236.5	16463.5	3023.32	2970.18	5190.6	12709.2	5178.52	11672.3	6353.73	6931.44	0	5772.17	7049.28
mir-34c	4882.13	939.058	1154.42	1732.68	2129.45	931.08	3409.57	616.529	2272.38	0	1443.55	1806.73	8592.47	1607.77	1628.6	3868.41	6406.03	3954.67	10178.4	1989.38	3231.87	2571.01	3550.14	4402.86
mir-203b	593.598	123.266	0	100.362	546.459	668.835	315.315	42.4607	119.779	2.14789	121.523	251.222	833.472	124.514	241.989	190.804	375.295	506.312	417.002	357.642	154.699	216.064	299.816	341.779
mir-34b	128.163	41.0888	43.1194	49.8925	51.2625	48.5479	198.671	29.2979	108.657	1.61092	49.2202	70.0311	326.385	72.2542	50.9712	144.492	255.578	246.875	429.916	72.646	60.6389	104.238	124.365	176.399
mir-342	47.218	18.7492	17.6398	9.22867	7.17676	133.507	47.5982	2.12303	28.5759	4.83275	18.1945	31.6649	26.6151	18.8588	17.8152	120.41	66.3605	117.74	112.686	55.8815	53.4342	32.9488	54.6579	62.2751
